# Supplementary material
Source: publisher figshare collection journal article supplement (https://gsajournals.figshare.com/ndownloader/files/12264317)
Supplement: Supplementary file 1 [file 12264317]

## Sheet: Table S2A
Hermaphrodite transcript expression levels
Expression levels are normalized and averaged across replicates as described in M&M
Open reading frame	1	2	3	4	5	6	7	8	9	10	Chromosome	Start	End	Strand	WBGene	Gene Name	Type
2L52.1	0	0	0	0	0	0.528014	0.953616	0	0	0	CHROMOSOME_II	1867	4663	+	WBGene00007063		cds
2RSSE.1	0	0	0	0	0	0	0	0	0	0	CHROMOSOME_II	15268136	15273238	+	WBGene00007064		cds
2RSSE.2	0	0	0	0	0	0	0	0	0	0	CHROMOSOME_II	15274315	15275613	+	WBGene00044165		cds
3R5.1	1.12859	4.93499	3.96332	3.42587	2.22905	2.74639	0.475186	2.37309	1.42378	1.19784	CHROMOSOME_III	13780127	13781032	+	WBGene00007065	pot-3	cds
4R79.1	0	0	0	0	0	0	0	0	0	0	CHROMOSOME_IV	17486946	17490461	-	WBGene00003525	nas-6	cds
4R79.2	0	0	0	0	0	0	0	0	0	0	CHROMOSOME_IV	17480360	17483294	-	WBGene00007067		cds
6R55.2	0	0	0	0	0	0	0	0	0	0	CHROMOSOME_X	17714380	17714756	+	WBGene00007069		cds
AC3.1	0	0	0	0	0	0	0	0	0	0	CHROMOSOME_V	10368533	10369845	+	WBGene00005532	sri-20	cds
AC3.10	0	0	0	0	0	0	0	0	0	0	CHROMOSOME_V	10384134	10385688	+	WBGene00004964	spe-10	cds
AC3.12	0	0	0	0	0	0	0	0	0	0	CHROMOSOME_V	10378929	10379380	-	WBGene00077503		cds
AC3.2	0	0	0.162666	0	0	0	0	0	0	1.49815	CHROMOSOME_V	10372118	10374238	+	WBGene00007070	ugt-49	cds
AC3.3	0	0	0	0	0	0	0	0	0	0	CHROMOSOME_V	10380316	10381800	-	WBGene00000024	abu-1	cds
AC3.4	0	0	0	0	0	0	0	0	0	0	CHROMOSOME_V	10382419	10383953	+	WBGene00004098	pqn-2	cds
AC3.5	0	0	0	0	0	0	0	0	0	0	CHROMOSOME_V	10388447	10393480	+	WBGene00007071		cds
AC3.6	0	0	0	0	0	0	0	0	0	0	CHROMOSOME_V	10393508	10395209	-	WBGene00000724	col-151	cds
AC3.7	0	0	0	0	0	0	0	0	0	0	CHROMOSOME_V	10395654	10397794	+	WBGene00007072	ugt-1	cds
AC3.8	0	0	0	0	0	0	0	0	0	0	CHROMOSOME_V	10398787	10401290	+	WBGene00007073	ugt-2	cds
AC7.1	0	0	0	0	0	0	0	0	0	0	CHROMOSOME_IV	5112921	5122011	-	WBGene00006428	tag-49	cds
AC7.2	0.564296	0	0.325332	0.292593	0.985677	4.92693	3.80149	4.65997	4.78407	3.74198	CHROMOSOME_IV	5126998	5145802	-	WBGene00004929	soc-2	cds
AC7.3	0	0	0	0	0	0	0	0	0	0	CHROMOSOME_IV	5111678	5112867	+	WBGene00014997		cds
AC8.10	0	0	0	0	0	0	0	0	0	0	CHROMOSOME_X	237496	239177	-	WBGene00043988		cds
AC8.11	0	0	0	0	0	0	0	0	0.481529	0	CHROMOSOME_X	236067	236810	-	WBGene00043989		cds
AC8.12	0	0	0	0	0	0.140565	0	0	0	0	CHROMOSOME_X	239849	240779	+	WBGene00043990		cds
AC8.3	0	0	0	0	0	0	0	0	0	0	CHROMOSOME_X	228080	229761	-	WBGene00007075		cds
AC8.4	0	0	0	0	0	0	0	0	0.481529	0	CHROMOSOME_X	226651	227394	-	WBGene00007076		cds
AC8.7	0	0	0	0	0	0.140565	0	0	0	0	CHROMOSOME_X	230433	231363	+	WBGene00007079		cds
AH10.1	0	0	0	0	0	0	0	0	0	0	CHROMOSOME_V	14146494	14148769	+	WBGene00007082	acs-10	cds
AH10.2	0	0	0	0	0	0	0	0	0	0	CHROMOSOME_V	14156816	14157607	+	WBGene00007083		cds
AH10.3	0	0	0	0	0	0	0	0	0	0	CHROMOSOME_V	14144015	14145396	-	WBGene00007084		cds
AH10.4	0	0	0.162666	0	0.140811	0	0	0	0	0	CHROMOSOME_V	14137333	14137625	-	WBGene00007085		cds
AH6.1	0	0	0	0	0	0	0	0	0	0	CHROMOSOME_II	9512431	9516877	-	WBGene00001528	gcy-1	cds
AH6.10	0	0	0	0	0	0	0	0	0	0	CHROMOSOME_II	9548346	9549639	-	WBGene00005032	sra-6	cds
AH6.11	0	0	0	0	0	0	0	0	0	0	CHROMOSOME_II	9544626	9546148	+	WBGene00005033	sra-7	cds
AH6.12	0	0	0	0	0	0	0	0	0	0	CHROMOSOME_II	9537669	9539025	+	WBGene00005034	sra-8	cds
AH6.14	0	0	0	0	0	0	0	0	0	0	CHROMOSOME_II	9532239	9533914	+	WBGene00005035	sra-9	cds
AH6.17	0	0	0	0	0	0	0	0	0	0	CHROMOSOME_II	9523111	9523475	+	WBGene00219290		cds
AH6.2	0	0	0	0	0	0	0	0	0	0	CHROMOSOME_II	9517509	9518837	-	WBGene00007080		cds
AH6.3	0	0	0	0	0	0	0	0	0	0	CHROMOSOME_II	9519037	9520151	+	WBGene00007081		cds
AH6.4	0	0	0	0	0	0	0	0	0	0	CHROMOSOME_II	9520141	9521611	-	WBGene00005027	sra-1	cds
AH6.5	3.73251	6.34556	10.6494	19.8614	47.2676	43.1601	40.4622	36.7186	47.6431	52.5396	CHROMOSOME_II	9524113	9526307	+	WBGene00003231	mex-6	cds
AH6.6	0	0	0	0	0	0	0	0	0	0	CHROMOSOME_II	9528720	9529802	+	WBGene00005028	sra-2	cds
AH6.7	0	0	0	0	0	0	0	0	0	0	CHROMOSOME_II	9539214	9540763	-	WBGene00005029	sra-3	cds
AH6.8	0	0	0	0	0	0	0	0	0	0	CHROMOSOME_II	9541541	9542825	-	WBGene00005030	sra-4	cds
AH9.1	0	0	0	0	0	0	0	0	0.471125	0	CHROMOSOME_X	2243226	2247000	-	WBGene00014998		cds
AH9.2	0	0	0	0	0.704055	5.13957	10.0081	2.28688	3.7794	5.98582	CHROMOSOME_X	2255840	2258073	-	WBGene00000797	crn-4	cds
AH9.3	0	0	0.223481	0	0.140811	4.93052	3.80798	6.86064	9.06581	11.0775	CHROMOSOME_X	2259144	2260518	-	WBGene00014999		cds
AH9.4	0	0	0	0	0	0	0	0	0	0	CHROMOSOME_X	2271017	2274329	-	WBGene00015000		cds
AH9.6	0	0	0	0	0	0	0	0	0	0	CHROMOSOME_X	2263168	2267464	-	WBGene00044701		cds
AH9.7	0	0	0	0	0	0	0.475186	0	0	0	CHROMOSOME_X	2243145	2244459	+	WBGene00175029		cds
B0001.1	3.16821	12.6992	20.446	20.2975	14.9194	12.8471	12.8527	15.8781	15.6616	18.3337	CHROMOSOME_IV	12129482	12135410	+	WBGene00003010	lin-24	cds
B0001.2	17.6495	15.5676	19.2465	19.3537	21.8631	16.0531	10.9487	7.85283	17.1686	15.9448	CHROMOSOME_IV	12146459	12150953	-	WBGene00007087		cds
B0001.3	2.25718	8.46745	8.77953	9.28549	7.94055	9.68264	8.57281	6.86064	5.2552	5.38859	CHROMOSOME_IV	12143409	12145709	-	WBGene00007088		cds
B0001.4	18.0847	16.5476	14.9608	18.5903	14.1374	13.8653	14.2718	11.1319	13.725	13.2454	CHROMOSOME_IV	12135058	12137327	-	WBGene00007089		cds
B0001.5	3.61693	7.4875	7.3976	4.7745	5.03137	6.16136	8.09763	6.21329	1.91571	3.06883	CHROMOSOME_IV	12141138	12143309	-	WBGene00007090		cds
B0001.6	0	0	0.162666	0	0.422433	4.43675	9.04475	6.12709	10.4792	6.51051	CHROMOSOME_IV	12156816	12164252	+	WBGene00007091		cds
B0001.7	10.7352	8.40809	8.02849	12.0332	14.8654	9.15104	4.27992	12.3404	12.3637	9.35156	CHROMOSOME_IV	12150934	12154220	-	WBGene00007092		cds
B0001.8	2.93706	8.57008	6.2802	7.40783	7.32832	6.9705	8.09114	5.56595	5.71592	10.4009	CHROMOSOME_IV	12138823	12141036	-	WBGene00007093		cds
B0019.1	0	0	0	0	0	0	0	0	0	0	CHROMOSOME_I	12759576	12764950	-	WBGene00000138	amx-2	cds
B0019.2	1.92404	2.98313	4.61398	2.84068	3.21473	4.47458	4.28316	3.02044	4.29214	3.06883	CHROMOSOME_I	12773647	12782247	+	WBGene00007094		cds
B0024.1	0	0	0	0	0	0	0	0	0	0	CHROMOSOME_V	10291671	10292843	-	WBGene00000722	col-149	cds
B0024.10	10.1845	7.32149	12.8249	14.153	11.9612	7.46068	11.4207	8.67259	9.94564	9.12718	CHROMOSOME_V	10315225	10317371	-	WBGene00007100		cds
B0024.11	12.4417	18.8827	9.26752	10.1768	12.5244	10.0016	12.856	9.49236	9.0242	3.96637	CHROMOSOME_V	10317465	10319509	-	WBGene00007101		cds
B0024.12	1.12859	0	0.325332	0.271281	0.247672	0.387449	0	1.55332	0.471125	0.224383	CHROMOSOME_V	10319510	10320133	-	WBGene00001646	gna-1	cds
B0024.13	1.80847	10.2533	9.45145	9.74281	14.5887	14.1536	16.1725	11.262	15.2425	11.3019	CHROMOSOME_V	10320690	10322190	+	WBGene00007102		cds
B0024.14	0	0	0	0.156952	0	0.140565	0	0	0	0	CHROMOSOME_V	10322262	10332087	-	WBGene00007103	crm-1	cds
B0024.15	0	0	0	0	0	0	0	0	0	0	CHROMOSOME_V	10289696	10291685	+	WBGene00007104		cds
B0024.2	0	0	0	0	0	0	0	0	0	0	CHROMOSOME_V	10293540	10294596	-	WBGene00000723	col-150	cds
B0024.3	0	0	0.162666	0	0	0	0	0	0	0	CHROMOSOME_V	10287539	10289247	+	WBGene00007096		cds
B0024.4	0	0	0	0	0	0	0	0	0	0	CHROMOSOME_V	10297374	10298957	+	WBGene00007097		cds
B0024.6	0	0	0	0	0	0	0	0	0	0	CHROMOSOME_V	10308266	10314028	-	WBGene00001533	gcy-6	cds
B0024.8	0	0	0	0	0	0	0	0	0.471125	0	CHROMOSOME_V	10299448	10307329	-	WBGene00000491	che-12	cds
B0024.9	20.3554	24.853	24.9186	28.831	21.6744	15.5935	12.3711	11.262	10.9607	10.5562	CHROMOSOME_V	10314616	10315751	+	WBGene00007099	trx-2	cds
B0025.1	1.24417	2.44184	3.67902	3.68937	2.41384	3.59336	0.475186	5.47974	3.32908	1.87099	CHROMOSOME_I	6028488	6033460	+	WBGene00006932	vps-34	cds
B0025.2	12.5709	8.35678	8.59708	12.3102	11.3011	10.3819	8.09114	10.1397	10.5	19.4658	CHROMOSOME_I	6022659	6026983	+	WBGene00000814	csn-2	cds
B0025.4	3.16821	4.06973	5.73139	6.30917	5.73543	5.31438	6.66558	2.28688	5.22399	6.06174	CHROMOSOME_I	6027194	6028372	+	WBGene00015001		cds
B0025.5	0	0	0	0	0	0	0	0	0	0	CHROMOSOME_I	6024153	6024957	-	WBGene00194700		cds
B0034.1	0	0	0	0	0	0	0	0	0	0	CHROMOSOME_II	5970080	5972630	+	WBGene00015002		cds
B0034.2	0	0	0	0	0	0	0	0	0	0	CHROMOSOME_II	5944171	5944343	-	WBGene00015003		cds
B0034.3	0.679874	0	0.325332	0.563874	0.495345	1.65612	4.76484	7.68041	6.66857	5.84075	CHROMOSOME_II	5945381	5956660	-	WBGene00000403	casy-1	cds
B0034.4	0	0	0	0	0	0	0	0	0	0	CHROMOSOME_II	5968110	5969033	-	WBGene00015004		cds
B0034.5	0	0	0	0	0	0	0	0	0	0	CHROMOSOME_II	5972831	5974952	-	WBGene00015005		cds
B0034.7	0	0	0.223481	0	0	0	0	0	0	0.749075	CHROMOSOME_II	5961652	5961975	+	WBGene00044394		cds
B0035.1	23.5237	26.4729	27.6414	26.9496	28.2987	33.9514	33.3214	17.7339	28.9675	30.3846	CHROMOSOME_IV	11310950	11312475	+	WBGene00007105		cds
B0035.10	0.564296	0	0.772294	1.12775	1.56396	1.75885	0.475186	0	0	0.973458	CHROMOSOME_IV	11326535	11327198	+	WBGene00001919	his-45	cds
B0035.11	10.7352	12.0985	15.0597	12.6532	18.4107	15.0349	17.6111	8.50017	9.045	11.8957	CHROMOSOME_IV	11327592	11329349	-	WBGene00007110		cds
B0035.12	19.2268	16.0696	13.1913	18.2202	19.1059	11.9317	14.288	17.9063	11.9134	17.1426	CHROMOSOME_IV	11329444	11332922	-	WBGene00007111		cds
B0035.13	0	0	0.223481	0.135641	0.140811	0	0.953616	0	0	0	CHROMOSOME_IV	11304699	11306698	-	WBGene00007112		cds
B0035.14	7.0163	4.34239	11.1374	8.52204	11.7575	13.0291	6.18715	7.5942	10.9815	10.6287	CHROMOSOME_IV	11298986	11304765	+	WBGene00001019	dnj-1	cds
B0035.15	15.0456	10.5813	11.8079	14.587	10.7957	11.6163	7.61271	13.8075	8.56348	12.1269	CHROMOSOME_IV	11296969	11298397	-	WBGene00007113		cds
B0035.16	0.564296	3.57975	2.05236	1.55598	1.69976	0.421694	0	0.819766	1.8845	1.12192	CHROMOSOME_IV	11295126	11296867	-	WBGene00007114		cds
B0035.18	6.90073	3.25578	2.74406	3.28245	2.6565	3.69968	2.85111	1.55332	1.92611	2.54414	CHROMOSOME_IV	11320298	11320621	+	WBGene00044290		cds
B0035.2	1.69289	3.52442	3.67902	3.91803	4.53101	5.56127	4.28316	3.754	4.77367	4.33921	CHROMOSOME_IV	11312451	11313954	-	WBGene00001020	dnj-2	cds
B0035.3	12.5573	15.1923	15.6298	15.1296	16.8668	16.7937	17.1294	7.76662	11.9342	19.3865	CHROMOSOME_IV	11314055	11315028	-	WBGene00007106		cds
B0035.4	20.9197	15.8996	17.2762	20.059	15.4236	11.0883	9.52318	11.4344	9.50573	10.3284	CHROMOSOME_IV	11315183	11315855	+	WBGene00007107	pfd-4	cds
B0035.5	4.29681	6.02159	9.12612	5.94487	7.14855	5.20806	2.85436	3.27906	5.2656	9.95557	CHROMOSOME_IV	11317395	11319928	+	WBGene00007108	gspd-1	cds
B0035.6	28.7451	30.1633	31.5029	29.6391	38.9335	35.0759	41.4028	42.5009	45.7586	48.1245	CHROMOSOME_IV	11320778	11323614	+	WBGene00007109		cds
B0035.7	0.564296	0.651961	1.21925	1.03473	1.31127	0.843388	2.85436	0.819766	0.963057	1.12192	CHROMOSOME_IV	11323863	11324448	-	WBGene00001921	his-47	cds
B0035.8	2.48834	3.31112	6.09776	6.87304	7.22647	6.12353	5.71521	6.55813	5.6743	4.78797	CHROMOSOME_IV	11324697	11325200	+	WBGene00001922	his-48	cds
B0035.9	0.564296	0.75861	1.64644	2.59071	2.09325	1.40565	0	0.819766	1.8949	2.99291	CHROMOSOME_IV	11325996	11326307	-	WBGene00001920	his-46	cds
B0041.1	0	0	0	0	0	0	0	0	0	0	CHROMOSOME_I	4664500	4665349	+	WBGene00015006		cds
B0041.11	0	0.21732	0	0.135641	0	1.1281	2.85436	0.733557	0.963057	2.39568	CHROMOSOME_I	4661116	4662200	-	WBGene00206362		cds
B0041.2	1.35975	1.46591	1.80911	1.01342	2.22905	1.40923	0	0.733557	2.86836	0.448767	CHROMOSOME_I	4653472	4659519	+	WBGene00015007	ain-2	cds
B0041.3	0	0	0	0.135641	0.422433	1.47772	1.4288	0.819766	0.481529	0.67315	CHROMOSOME_I	4644438	4645627	+	WBGene00015008		cds
B0041.4	502.074	353.176	293.702	241.536	186.899	176.796	173.835	53.545	44.9961	21.4784	CHROMOSOME_I	4645637	4646966	-	WBGene00004415	rpl-4	cds
B0041.5	0	4.01439	7.49797	6.12313	6.91979	6.65512	7.14077	5.47974	4.28174	7.63582	CHROMOSOME_I	4648270	4650771	-	WBGene00015009		cds
B0041.6	0	0.813946	0	0	0	0.387449	0.953616	0.819766	0	0	CHROMOSOME_I	4652144	4652907	-	WBGene00015010	ptps-1	cds
B0041.7	14.6989	18.3374	16.1588	15.1431	16.4143	17.3595	17.6241	8.97511	15.7552	9.05465	CHROMOSOME_I	4665745	4671739	-	WBGene00006961	xnp-1	cds
B0041.8	11.6462	16.4409	22.1122	20.9117	19.9947	20.7673	12.384	17.9925	14.7089	18.4821	CHROMOSOME_I	4647319	4648279	+	WBGene00015011		cds
B0047.1	2.03962	0.651961	0.162666	0.135641	0.106861	0.387449	0	0	0	0	CHROMOSOME_II	2040276	2041620	-	WBGene00015012	bath-20	cds
B0047.2	0.679874	1.62789	0.223481	0.135641	0.675118	0.562259	0.953616	0	0	0.224383	CHROMOSOME_II	2043028	2044064	-	WBGene00015013	btb-3	cds
B0047.3	3.96367	1.24859	2.05236	2.04815	2.08824	1.44348	0	0	0	0	CHROMOSOME_II	2044629	2045590	-	WBGene00015014	bath-24	cds
B0047.4	0	0	0	0	0.106861	0.246884	0	0	0	0	CHROMOSOME_II	2045968	2046661	-	WBGene00015015	math-1	cds
B0198.1	0	0	0	0.135641	0	0.140565	0.950372	0	0	0	CHROMOSOME_X	12031530	12033969	-	WBGene00006646	tsp-20	cds
B0198.2	0	0	0	0	0	0	0	0	0	0	CHROMOSOME_X	12028643	12031429	+	WBGene00007115		cds
B0198.3	0	0	0	0	0	0	0.953616	0.819766	0	0	CHROMOSOME_X	12042548	12049279	-	WBGene00007116		cds
B0205.1	13.8015	9.00874	11.2393	11.975	13.4472	13.0669	14.7535	10.8733	8.12356	16.7698	CHROMOSOME_I	10713439	10718190	-	WBGene00015017		cds
B0205.10	0	0	0	0	0	0	0	0	0	0	CHROMOSOME_I	10708352	10710364	+	WBGene00015024		cds
B0205.11	35.4011	29.3061	37.1339	39.5659	29.9355	13.1968	15.7168	7.76662	12.3533	11.0016	CHROMOSOME_I	10732531	10733674	-	WBGene00015025	mrpl-9	cds
B0205.12	3.73251	3.03846	6.30146	3.2476	3.44349	2.39318	1.90399	0.819766	0.471125	1.12192	CHROMOSOME_I	10730456	10730701	+	WBGene00044413		cds
B0205.13	0	0	0	0.156952	0	0	0	0	0	0	CHROMOSOME_I	10727740	10728784	-	WBGene00044644		cds
B0205.14	0	0	0	0	0	0	0	0	0	0	CHROMOSOME_I	10726907	10727340	+	WBGene00044646		cds
B0205.2	0	0	0	0	0	0	0	0	0	0	CHROMOSOME_I	10724150	10726125	-	WBGene00015018	srz-85	cds
B0205.3	43.6615	45.4743	42.4608	55.4918	50.774	47.6833	51.8537	55.7049	46.6696	73.9659	CHROMOSOME_I	10730718	10732437	-	WBGene00004466	rpn-10	cds
B0205.4	0	0	0	0	0	0	0	0	0	0	CHROMOSOME_I	10741358	10744432	-	WBGene00015019		cds
B0205.5	0.679874	0	0	0	0	0	0	0	0	0	CHROMOSOME_I	10740207	10740579	+	WBGene00015020		cds
B0205.6	10.1845	21.0087	13.2734	16.3852	15.5065	11.4415	9.04475	9.31994	12.866	9.50681	CHROMOSOME_I	10736686	10739900	+	WBGene00015021		cds
B0205.7	39.7999	31.8586	27.9272	38.5563	33.1252	24.0525	16.651	31.0665	29.1027	37.1297	CHROMOSOME_I	10734011	10736596	+	WBGene00002191	kin-3	cds
B0205.8	11.082	11.8299	12.0739	10.605	9.65922	6.90201	13.3247	8.24155	8.12356	11.3778	CHROMOSOME_I	10728884	10730226	-	WBGene00015022		cds
B0205.9	3.84809	3.95906	6.05672	5.83831	6.01705	8.97982	4.7551	4.74618	8.56348	8.30557	CHROMOSOME_I	10720815	10723580	+	WBGene00015023		cds
B0207.1	0	0	0	0	0	0	0	0	0	0	CHROMOSOME_I	5965064	5967213	+	WBGene00015026		cds
B0207.10	0	0	0	0	0	0	0	0	0	0	CHROMOSOME_I	5959010	5959528	-	WBGene00015033		cds
B0207.11	0	0	0	0	0	0	0	0	0	0	CHROMOSOME_I	5962954	5964128	-	WBGene00015034		cds
B0207.12	0	0	0	0	0	0	0	0	0	0	CHROMOSOME_I	5967253	5973322	-	WBGene00000232	avr-14	cds
B0207.2	0	0	0	0	0	0	0	0	0	0	CHROMOSOME_I	5955032	5956885	+	WBGene00015027		cds
B0207.3	0	0	0	0	0	0	0	0	0	0	CHROMOSOME_I	5942421	5945539	+	WBGene00001676	gpa-14	cds
B0207.4	9.83778	10.4153	13.7203	12.0332	16.648	13.7968	25.7119	19.3734	20.5185	26.3491	CHROMOSOME_I	5937479	5938887	+	WBGene00000099	air-2	cds
B0207.5	0	0	0	0.135641	0	0	0	0	0	0	CHROMOSOME_I	5919789	5935418	+	WBGene00015028		cds
B0207.6	4.8611	9.27738	8.67767	6.3014	5.49277	7.00474	9.04475	2.28688	8.54267	7.63242	CHROMOSOME_I	5935372	5936946	-	WBGene00015029		cds
B0207.7	0	0	0	0	0	0	0	0	0	0	CHROMOSOME_I	5945759	5947344	-	WBGene00015030		cds
B0207.8	0	0	0	0	0	0	0	0	0	0	CHROMOSOME_I	5951138	5951744	-	WBGene00015031		cds
B0207.9	0	0	0	0	0	0	0	0	0	0	CHROMOSOME_I	5957462	5958361	-	WBGene00015032		cds
B0212.1	0	0	0	0	0	0	0	0	0	0	CHROMOSOME_IV	3572467	3577625	+	WBGene00015035	otpl-1	cds
B0212.2	0	0	0	0	0	0	0	0	0	0	CHROMOSOME_IV	3565197	3567810	+	WBGene00015036	sre-5	cds
B0212.3	0	0	0.386147	0.156952	0.743017	1.93725	0.950372	0.819766	0.963057	0.67315	CHROMOSOME_IV	3540184	3543598	+	WBGene00015037		cds
B0212.4	0	0.75861	0	0.313904	0	0	0	0.819766	0	0	CHROMOSOME_IV	3543624	3547596	-	WBGene00015038	nstp-6	cds
B0212.5	0	0	0	0	0	0	0	0	0	0	CHROMOSOME_IV	3551086	3557427	-	WBGene00003889	osm-9	cds
B0212.6	0	0	0	0	0	0	0	0	0	0	CHROMOSOME_IV	3570714	3571642	+	WBGene00044111		cds
B0213.10	0	0	0	0	0	0	0	0	0	0	CHROMOSOME_V	3955751	3957700	-	WBGene00015040	cyp-34A5	cds
B0213.11	0	0	0	0	0	0	0	0	0	0	CHROMOSOME_V	3958224	3961343	-	WBGene00015041	cyp-34A6	cds
B0213.12	0	0	0	0	0	0	0	0	0	0	CHROMOSOME_V	3961745	3963800	-	WBGene00015042	cyp-34A7	cds
B0213.14	0	0	0	0	0	0	0	0	0	0	CHROMOSOME_V	3964764	3967856	-	WBGene00015043	cyp-34A8	cds
B0213.15	0	0	0	0	0	0	0	0	0	0	CHROMOSOME_V	3968118	3970499	-	WBGene00015044	cyp-34A9	cds
B0213.16	0	0	0	0	0	0	0	0	0	0	CHROMOSOME_V	3970697	3972986	-	WBGene00015045	cyp-34A10	cds
B0213.17	0	0	0	0	0	0	0	0	0	0	CHROMOSOME_V	3978814	3979119	-	WBGene00015046	nlp-34	cds
B0213.2	0	0.379305	0	0	0	0	0	0	0.471125	0	CHROMOSOME_V	3989076	3989755	+	WBGene00003765	nlp-27	cds
B0213.3	0	0	0	0	0	0	0	0	0	0.224383	CHROMOSOME_V	3987885	3988299	+	WBGene00003766	nlp-28	cds
B0213.4	0	0	0	0	0	0	0	0	0	0	CHROMOSOME_V	3984398	3984834	+	WBGene00003767	nlp-29	cds
B0213.5	0	0	0	0.135641	0	0.140565	0	0	0	0	CHROMOSOME_V	3981965	3982730	+	WBGene00003768	nlp-30	cds
B0213.6	0	0.596626	0.386147	0	0.106861	0.246884	0	0.733557	0.471125	0	CHROMOSOME_V	3980040	3980602	+	WBGene00003769	nlp-31	cds
B0213.7	0	0	0	0	0	0	0	0	0	0	CHROMOSOME_V	3977249	3978796	+	WBGene00006142	str-83	cds
B0213.8	0	0	0	0	0	0	0	0	0	0	CHROMOSOME_V	3974646	3976249	+	WBGene00006141	str-82	cds
B0213.9	0	0	0	0	0	0	0	0	0	0	CHROMOSOME_V	3954024	3955445	+	WBGene00006274	str-247	cds
B0218.1	0	0	0.325332	0	0.281622	2.00932	3.80798	1.63953	0.94225	0.224383	CHROMOSOME_IV	8159344	8162028	+	WBGene00015047	faah-1	cds
B0218.2	0	0	0	0	0.140811	0.246884	0	0	0	0.749075	CHROMOSOME_IV	8152429	8154845	+	WBGene00015048	faah-2	cds
B0218.3	0	0	0	0	0	1.05603	2.38242	0	0.963057	0.448767	CHROMOSOME_IV	8148780	8150727	+	WBGene00004055	pmk-1	cds
B0218.5	0	0	0	0	0	0	0	0	0	0	CHROMOSOME_IV	8155237	8156433	-	WBGene00015049		cds
B0218.6	0	0	0	0	0	0	0	0	0	0	CHROMOSOME_IV	8161738	8163781	-	WBGene00015050	clec-51	cds
B0218.7	0	0	0	0	0	0	0	0	0	0	CHROMOSOME_IV	8164580	8166064	-	WBGene00015051		cds
B0218.8	0	0	0	0	0	0	0	0	0	0	CHROMOSOME_IV	8167149	8168760	-	WBGene00015052	clec-52	cds
B0222.1	0	0	0	0	0	0	0	0	0	0	CHROMOSOME_V	9134277	9135553	+	WBGene00015053		cds
B0222.10	0	0	0	0	0	0	0	0	0	0	CHROMOSOME_V	9158361	9159515	+	WBGene00015058		cds
B0222.11	0	0	0	0	0	0	0	0	0	0	CHROMOSOME_V	9165797	9168018	-	WBGene00044582		cds
B0222.2	0	0	0	0	0	0	0	0	0	0	CHROMOSOME_V	9135634	9137696	-	WBGene00015054		cds
B0222.3	0	0	0	0	0	0	0	0	0	0	CHROMOSOME_V	9138928	9141375	-	WBGene00015055		cds
B0222.4	0	0	0	0	0	0	0	0	0	0	CHROMOSOME_V	9144593	9146877	-	WBGene00006418	tag-38	cds
B0222.5	0	0	0	0	0	0	0	0	0	0	CHROMOSOME_V	9152299	9154850	-	WBGene00015056		cds
B0222.6	0	0	0	0	0	0	0	0	0	0	CHROMOSOME_V	9159619	9160640	-	WBGene00000717	col-144	cds
B0222.7	0	0	0	0	0	0	0	0	0	0	CHROMOSOME_V	9162028	9162982	-	WBGene00000718	col-145	cds
B0222.8	0	0	0	0	0	0	0	0	0	0	CHROMOSOME_V	9164272	9165284	-	WBGene00000599	col-10	cds
B0222.9	0	0	0	0	0	0	0	0	0	0	CHROMOSOME_V	9168369	9173001	-	WBGene00015057	gad-3	cds
B0228.1	0	0	0	0	0	0	0	0	0	0	CHROMOSOME_II	7755956	7756856	+	WBGene00015059		cds
B0228.4	0	0	0	0.156952	0.106861	0.493769	0	0	0.481529	1.19784	CHROMOSOME_II	7724850	7752673	+	WBGene00015061	cpna-2	cds
B0228.5	0	0	0	0	0	0	0	0	0	0	CHROMOSOME_II	7752579	7753554	-	WBGene00015062	trx-1	cds
B0228.6	0	0	0	0	0	0	0	0	0	0	CHROMOSOME_II	7754515	7755104	-	WBGene00015063		cds
B0228.7	7.0163	13.6751	10.8121	8.55689	9.59132	4.39892	1.4288	0.819766	2.38684	2.39568	CHROMOSOME_II	7757138	7758387	-	WBGene00015064		cds
B0228.8	0	0	0	0	0	0	0	0	0	0	CHROMOSOME_II	7759658	7761488	-	WBGene00015065		cds
B0228.9	0	0	0	0	0	0	0	0	0	0	CHROMOSOME_II	7762010	7763617	-	WBGene00015066		cds
B0238.1	0	0	0	0	0	0.387449	0.953616	0	0	0	CHROMOSOME_V	5240754	5243120	-	WBGene00015067		cds
B0238.10	4.41239	6.61822	6.72716	5.4527	5.55565	6.1956	5.23353	6.2995	7.1501	12.5756	CHROMOSOME_V	5274058	5275546	+	WBGene00015074		cds
B0238.11	44.8037	38.0935	41.1367	40.2965	34.4627	39.9471	35.7103	30.5492	25.5968	39.5118	CHROMOSOME_V	5269467	5270728	+	WBGene00015075		cds
B0238.12	0	0	0	0	0	0	0	0	0	0	CHROMOSOME_V	5267806	5268807	+	WBGene00015076		cds
B0238.13	0	0	0	0	0	0.387449	1.90723	0	0	0	CHROMOSOME_V	5243713	5248024	-	WBGene00015077		cds
B0238.15	0	0	0	0	0	0.387449	0	0	0	0.224383	CHROMOSOME_V	5240173	5240435	+	WBGene00044537		cds
B0238.3	0	0	0	0	0	0	0	0	0	0	CHROMOSOME_V	5250588	5252100	-	WBGene00015068	srt-68	cds
B0238.5	0	0	0	0	0	0	0	0	0	0	CHROMOSOME_V	5256126	5257442	-	WBGene00015069	srt-67	cds
B0238.6	0	0	0	0	0	0	0	0	0	0	CHROMOSOME_V	5258020	5259532	-	WBGene00015070	srt-70	cds
B0238.7	0	0	0	0	0	0	0	0	0	0	CHROMOSOME_V	5260316	5263083	-	WBGene00015071		cds
B0238.8	0	0	0	0	0	0	0	0	0	0	CHROMOSOME_V	5263935	5265760	-	WBGene00015072	srt-69	cds
B0238.9	9.15791	11.9878	20.7105	22.9443	28.4534	18.4156	13.7999	13.9799	18.09	21.2541	CHROMOSOME_V	5275533	5278290	-	WBGene00015073		cds
B0240.1	0	0	0	0	0	0	0	0	0	0	CHROMOSOME_V	11727880	11730142	-	WBGene00004359	rhr-2	cds
B0240.2	0	0	0	0	0	0	0	0	0	0	CHROMOSOME_V	11733526	11736950	-	WBGene00007117	spe-42	cds
B0240.3	0	0	0	0	0	0	0	0	0	0	CHROMOSOME_V	11718071	11725634	-	WBGene00000907	daf-11	cds
B0240.4	13.006	22.2452	16.2211	16.6138	26.1325	27.8442	25.227	29.9881	38.5877	32.6386	CHROMOSOME_V	11730974	11733461	-	WBGene00007118	npp-22	cds
B0244.10	0	0	0	0	0	0	0	0	0	0	CHROMOSOME_III	5733951	5737469	+	WBGene00015085		cds
B0244.11	0	0	0	0	0	0	0	0	0	0	CHROMOSOME_III	5767837	5768620	+	WBGene00015086		cds
B0244.15	0	0	0	0	0	0	0	0	0	0	CHROMOSOME_III	5742510	5744774	+	WBGene00206513		cds
B0244.2	0	0	0	0	0	0	0	0	0	0	CHROMOSOME_III	5755493	5765769	+	WBGene00002048	ida-1	cds
B0244.4	0	0	0	0	0	0	0	0	0	0	CHROMOSOME_III	5747439	5751591	+	WBGene00015079		cds
B0244.5	0	0	0	0	0	0	0	0	0	0	CHROMOSOME_III	5744833	5747149	+	WBGene00015080		cds
B0244.6	0.679874	0	0	0	0	0	0	0	0	0	CHROMOSOME_III	5737962	5741508	+	WBGene00015081		cds
B0244.7	0	0	0	0	0	0	0	0	0	0	CHROMOSOME_III	5731455	5732808	+	WBGene00015082		cds
B0244.8	9.50464	12.2565	39.7504	59.1115	106.118	114.429	155.603	139.716	158.768	125.073	CHROMOSOME_III	5728132	5730348	+	WBGene00015083	egg-1	cds
B0244.9	0	0	0	0	0	0	0	0	0	0	CHROMOSOME_III	5730074	5730965	-	WBGene00015084		cds
B0250.1	535.517	374.37	302.97	254.968	200.695	197.084	167.596	74.5156	54.429	16.9115	CHROMOSOME_V	20479656	20480815	+	WBGene00004413	rpl-2	cds
B0250.10	0	0	0	0	0	0	0	0	0	0	CHROMOSOME_V	20487614	20489171	-	WBGene00007127	srbc-78	cds
B0250.18	0	0	0	0	0	0	0	0	0	0	CHROMOSOME_V	20456815	20457223	-	WBGene00206505		cds
B0250.2	0	0	0	0	0	0	0	0	0	0	CHROMOSOME_V	20476717	20479058	-	WBGene00007119	calf-1	cds
B0250.5	8.02932	8.84676	11.5251	17.6273	16.1917	13.804	14.2783	17.4753	17.6189	18.9377	CHROMOSOME_V	20493893	20497315	+	WBGene00007122		cds
B0250.6	0	0	0	0	0	0	0	0	0	0	CHROMOSOME_V	20490740	20492454	-	WBGene00007123	srbc-79	cds
B0250.8	20.8042	11.1306	15.6511	9.41336	6.897	9.14388	3.33603	0	0	2.62007	CHROMOSOME_V	20469672	20470454	-	WBGene00007125		cds
B0250.9	0	0	0	0.406922	0.213723	0.246884	0	0	0.471125	0	CHROMOSOME_V	20480761	20485354	-	WBGene00007126	dhcr-7	cds
B0252.1	0.679874	0	0	0	0	0	0	0	0	0	CHROMOSOME_II	6919687	6923621	+	WBGene00015087		cds
B0252.2	0	0	0.223481	0.135641	0	0.740653	0	0	0	0.749075	CHROMOSOME_II	6910028	6912653	+	WBGene00000211	asm-1	cds
B0252.3	0	0	0	0	0	0.140565	2.38242	0.733557	0.952653	1.72253	CHROMOSOME_II	6902826	6907713	-	WBGene00015088		cds
B0252.4	2.48834	7.43619	8.92241	9.43467	10.0338	10.9856	11.4174	9.23373	6.66857	8.3815	CHROMOSOME_II	6912498	6913321	-	WBGene00000886	cyn-10	cds
B0252.5	0	0	0	0	0	0	0	0	0	0	CHROMOSOME_II	6916949	6918878	-	WBGene00015089		cds
B0252.8	0	0	0	0	0	0	0	0	0	0	CHROMOSOME_II	6916112	6916923	+	WBGene00044615		cds
B0261.1	5.54098	6.24293	7.60131	8.03564	8.57169	9.37085	2.85111	3.8402	9.08662	10.3284	CHROMOSOME_I	5263697	5268387	+	WBGene00015091		cds
B0261.2	8.59361	5.58695	7.84605	7.17917	8.56167	6.75786	11.4272	11.8654	12.9388	10.8531	CHROMOSOME_I	5245743	5263429	+	WBGene00002583	let-363	cds
B0261.4	5.65656	8.08815	8.13034	8.00655	6.47844	5.77391	3.3263	4.01262	4.32335	0.897533	CHROMOSOME_I	5244286	5245526	+	WBGene00015092	mrpl-47	cds
B0261.5	0	0	0	0	0	0	0	0	0	0	CHROMOSOME_I	5249775	5250440	-	WBGene00015093		cds
B0261.6	0	0	0	0	0	0	0	0	0	0	CHROMOSOME_I	5255450	5256926	-	WBGene00015094		cds
B0261.7	69.8775	70.9672	81.0953	64.6071	65.1173	54.9676	49.5037	75.2069	67.3783	52.2291	CHROMOSOME_I	5269547	5270937	-	WBGene00015095		cds
B0261.8	0	0.21732	0.386147	0.470856	0.95674	4.08713	3.81446	0	1.42378	3.66945	CHROMOSOME_I	5271280	5272040	-	WBGene00015096		cds
B0261.9	0	0	0	0	0	0	0	0	0	0	CHROMOSOME_I	5268422	5269466	+	WBGene00195057		cds
B0272.1	0	0	0.162666	0	0	0	0	0	0	0	CHROMOSOME_X	9434393	9436834	-	WBGene00006538	tbb-4	cds
B0272.2	0	0	0	0	0.140811	0.528014	1.90723	0	0	0.897533	CHROMOSOME_X	9440339	9441505	-	WBGene00007128	memb-1	cds
B0272.3	1.35975	0	0.162666	0.135641	1.65578	11.0576	13.3279	12.2542	11.4839	19.4658	CHROMOSOME_X	9431366	9432689	+	WBGene00007129		cds
B0272.4	0	0	0	0	0	0	0	0	0	0	CHROMOSOME_X	9428372	9430264	+	WBGene00007130		cds
B0273.1	0	0	0	0	0	0	0	0.819766	0	0	CHROMOSOME_IV	5493986	5495241	+	WBGene00015097		cds
B0273.115	0	0.596626	0	0	0.106861	0	0	0	0	0	CHROMOSOME_IV	5490546	5491145	-	WBGene00206473		cds
B0273.2	5.88771	13.3944	16.6454	24.5003	33.4809	28.7632	29.9789	33.0085	26.1928	30.388	CHROMOSOME_IV	5486676	5490322	+	WBGene00004243	puf-7	cds
B0273.3	12.8904	10.9093	6.09776	5.58057	4.28334	2.99327	0.475186	0.733557	2.37643	1.57068	CHROMOSOME_IV	5484037	5486201	-	WBGene00015098		cds
B0273.4	0.564296	0	1.09763	0.428233	0.422433	0.634333	1.4288	0	1.92611	6.58982	CHROMOSOME_IV	5495657	5516256	-	WBGene00006745	unc-5	cds
B0280.1	11.5307	10.0913	9.28878	13.7461	12.904	12.7408	7.61271	12.9015	13.2747	9.87626	CHROMOSOME_III	7133727	7136401	+	WBGene00015099	ggtb-1	cds
B0280.10	3.73251	3.6864	6.64657	6.04566	4.8516	3.62402	4.28316	3.27906	3.82102	3.36914	CHROMOSOME_III	7131972	7133616	-	WBGene00015105	pot-1	cds
B0280.11	0	0	0	0	0	0	0	0	0	0	CHROMOSOME_III	7136448	7138216	-	WBGene00015106		cds
B0280.12	0	0	0	0	0	0.140565	0.953616	0	0	0	CHROMOSOME_III	7138621	7144770	-	WBGene00001613	glr-2	cds
B0280.13	0	0	0	0	0	0	0	0	0	0	CHROMOSOME_III	7128837	7131986	+	WBGene00015107		cds
B0280.17	0	0	0	0	0	0	0	0	0	0	CHROMOSOME_III	7134960	7136065	-	WBGene00044674		cds
B0280.2	0	0	0	0	0	0	0	0	0	0	CHROMOSOME_III	7124602	7128320	+	WBGene00015100		cds
B0280.3	35.0679	41.2305	48.0676	56.3929	53.3436	40.7634	38.07	45.9962	35.1129	25.6726	CHROMOSOME_III	7123062	7124270	+	WBGene00015101	rpia-1	cds
B0280.4	0	0	0	0	0	0	0	0	0	0	CHROMOSOME_III	7108260	7109248	+	WBGene00003845	odd-1	cds
B0280.5	29.6425	34.3276	98.8689	158.376	185.237	232.583	418.386	422.811	410.999	337.833	CHROMOSOME_III	7102024	7103930	-	WBGene00015102	cpg-2	cds
B0280.7	0	0	0	0	0	0	0	0	0	0	CHROMOSOME_III	7110241	7111811	-	WBGene00015103		cds
B0280.8	0	0	0.386147	0.313904	0.281622	7.49851	6.66882	5.30732	7.60042	7.11112	CHROMOSOME_III	7112238	7115378	-	WBGene00003609	nhr-10	cds
B0280.9	4.52796	5.04968	6.26042	6.59399	7.96448	8.97982	8.09438	5.56595	5.2448	7.10773	CHROMOSOME_III	7120842	7122833	-	WBGene00015104		cds
B0281.1	0	0	0	0	0	0	0	0	0	0	CHROMOSOME_II	2313072	2314932	+	WBGene00015108		cds
B0281.3	0	0	0	0	0	0	0	0	0	0	CHROMOSOME_II	2307046	2308356	+	WBGene00015110		cds
B0281.4	0	0	0	0	2.33591	3.44563	2.86085	0	0	0	CHROMOSOME_II	2297852	2298798	-	WBGene00015111		cds
B0281.5	0	0	0.325332	0.135641	0	0.246884	0.475186	0	0.471125	1.87099	CHROMOSOME_II	2299853	2300887	-	WBGene00015112		cds
B0281.6	0	0	0	0	0	0	0	0	0	0	CHROMOSOME_II	2301313	2302234	-	WBGene00015113		cds
B0281.8	0	0	0	0	0	0	0	0	0	0	CHROMOSOME_II	2311495	2312852	-	WBGene00015114		cds
B0284.1	0	0	0	0	0	0	0	0	0	0	CHROMOSOME_III	4376475	4378855	+	WBGene00007131		cds
B0284.2	0	0	0	0	0	0	0	0	0	0	CHROMOSOME_III	4381711	4384113	+	WBGene00007132		cds
B0284.3	0	0	0	0	0.140811	1.40923	0	0	0	0	CHROMOSOME_III	4379340	4381013	-	WBGene00007133		cds
B0284.4	0	0	0	0	0	0	0	0	0	0	CHROMOSOME_III	4384759	4387729	+	WBGene00007134		cds
B0285.1	2.60392	4.12507	5.75265	6.03789	3.86091	5.24948	2.37917	4.57376	4.72165	7.48736	CHROMOSOME_III	4333369	4340455	+	WBGene00007135	cdtl-7	cds
B0285.10	0	0	0	0	0	0	0	0	0	0	CHROMOSOME_III	4370857	4372792	+	WBGene00000513	ckb-3	cds
B0285.3	4.51437	7.00154	6.4839	4.68148	6.22576	6.58663	7.13752	6.2995	9.01379	8.45742	CHROMOSOME_III	4341657	4343308	-	WBGene00007136		cds
B0285.4	6.66957	5.53564	6.07798	6.64438	6.37659	7.00116	5.71521	3.02044	7.1501	4.71544	CHROMOSOME_III	4343433	4345194	+	WBGene00007137		cds
B0285.5	8.1449	8.94938	13.3342	14.9591	17.2842	20.9493	16.6704	31.1104	28.1085	27.6988	CHROMOSOME_III	4345309	4350051	+	WBGene00002003	hse-5	cds
B0285.6	0	0	0	0	0	0	0	0	0	0	CHROMOSOME_III	4352218	4355860	+	WBGene00007138		cds
B0285.7	0	0	0	0	0	0.387449	0	0	0.952653	0.448767	CHROMOSOME_III	4356511	4364938	+	WBGene00007139	mnp-1	cds
B0285.8	0	0	0	0	0	0.634333	0.950372	2.93423	0.471125	0	CHROMOSOME_III	4365347	4367441	+	WBGene00000511	ckb-1	cds
B0285.9	0	0	0	0	0.281622	3.77176	2.85111	1.55332	2.36603	4.04229	CHROMOSOME_III	4367804	4370132	+	WBGene00000512	ckb-2	cds
B0286.1	0	0	0.325332	0.156952	0.106861	0.387449	0	0.733557	0	0.749075	CHROMOSOME_II	4378659	4386355	+	WBGene00015115		cds
B0286.2	0	0	0	0	0	0	0	0	0	0	CHROMOSOME_II	4359086	4368285	+	WBGene00002252	lat-2	cds
B0286.3	0	0	0	0.135641	0.247672	0	1.4288	0	0.963057	1.19784	CHROMOSOME_II	4369629	4372572	-	WBGene00015116		cds
B0286.4	30.3224	23.9284	33.9048	39.7364	61.2553	43.4106	34.262	45.6937	52.3751	46.3362	CHROMOSOME_II	4372744	4376745	-	WBGene00003825	ntl-2	cds
B0286.5	0	0	0	0	0	0	0	0	0.481529	0	CHROMOSOME_II	4379886	4383290	-	WBGene00001438	fkh-6	cds
B0286.6	0	0	0	0	0	0	0	0	0	0	CHROMOSOME_II	4368494	4369696	+	WBGene00023425	try-9	cds
B0294.1	0	0	0	0	0	0	0	0	0	0	CHROMOSOME_X	1896657	1897337	-	WBGene00015117		cds
B0294.3	0	0	0	0	0	0	0	0	0	0	CHROMOSOME_X	1892181	1893266	+	WBGene00015118		cds
B0302.1	1.12859	0	0.162666	0	0.563244	4.08713	4.76159	2.37309	2.87877	2.54414	CHROMOSOME_X	17186066	17193219	+	WBGene00002207	kin-25	cds
B0302.2	0	0	0	0	0	0	0	0	0	0	CHROMOSOME_X	17178465	17178918	+	WBGene00015119		cds
B0302.4	0	0	0	0	0	0	0	0	0	0	CHROMOSOME_X	17176416	17176703	-	WBGene00015121		cds
B0302.5	0	0	0	0	0	0	0.475186	0.733557	0	0.749075	CHROMOSOME_X	17193224	17195044	-	WBGene00015122		cds
B0303.11	0	0	0	0	0	0	0	0	0	0	CHROMOSOME_III	8703226	8710031	-	WBGene00015131		cds
B0303.14	0	0	0	0	0	0	3.32955	2.28688	2.85796	3.21729	CHROMOSOME_III	8713908	8716103	-	WBGene00015132		cds
B0303.15	11.9794	12.1579	8.71871	10.5333	8.93124	8.06077	9.51669	3.8402	6.63736	11.3019	CHROMOSOME_III	8717561	8718486	+	WBGene00015133	mrpl-11	cds
B0303.16	0	0	0	0	0	0	0	0	0	0	CHROMOSOME_III	8705030	8706266	+	WBGene00044678		cds
B0303.2	0	0.21732	0.223481	0.156952	0.461395	0.387449	0	0	0.471125	0	CHROMOSOME_III	8684727	8686400	+	WBGene00015124		cds
B0303.3	10.0689	12.4778	14.2266	13.4748	24.9582	23.8976	25.699	18.7261	29.1027	28.2201	CHROMOSOME_III	8686037	8688396	-	WBGene00015125		cds
B0303.4	4.29681	6.34556	7.35805	4.168	5.66251	5.35221	7.6192	7.76662	2.36603	6.95927	CHROMOSOME_III	8689769	8693392	+	WBGene00015126		cds
B0303.7	0	0.21732	0.650665	0	0.140811	3.94656	2.38242	9.14752	2.85796	3.89044	CHROMOSOME_III	8693557	8699374	+	WBGene00015128		cds
B0303.8	0	0	0	0	0	0	0	0	0	0	CHROMOSOME_III	8699402	8700254	-	WBGene00015129	sdz-1	cds
B0303.9	5.77213	6.83554	9.67345	15.9647	23.8495	16.4783	22.3759	15.6194	19.5138	12.9485	CHROMOSOME_III	8700848	8703225	+	WBGene00015130		cds
B0304.1	0	0	0	0	0	0	0	0	0	0	CHROMOSOME_II	4518557	4522454	+	WBGene00001948	hlh-1	cds
B0304.2	9.83778	7.32551	9.04553	9.89199	14.3411	6.82635	6.65909	6.38571	9.00339	6.88335	CHROMOSOME_II	4523612	4524589	+	WBGene00015134		cds
B0304.3	0	0	0	0.156952	0	0	0	0	0	0	CHROMOSOME_II	4512208	4516130	+	WBGene00015135	cyp-23A1	cds
B0304.4	1.24417	2.98715	2.03259	3.51111	2.62255	3.20233	1.90074	2.28688	5.23439	2.24383	CHROMOSOME_II	4522459	4523219	-	WBGene00015136		cds
B0304.5	0	0	0	0	0	0	0	1.55332	0.471125	1.19784	CHROMOSOME_II	4529633	4531961	-	WBGene00005058	sra-32	cds
B0304.6	0	0	0	0	0	0	0	0	0	0	CHROMOSOME_II	4534739	4537238	-	WBGene00005059	sra-33	cds
B0304.7	0	0	0	0	0	0	0	0	0	0	CHROMOSOME_II	4541862	4543665	-	WBGene00005060	sra-34	cds
B0304.8	0	0	0	0	0.106861	0	0	0	0	0	CHROMOSOME_II	4524631	4527897	-	WBGene00005061	sra-35	cds
B0304.9	0	0	0	0	0	0	0	0	0	0	CHROMOSOME_II	4538985	4540728	-	WBGene00005062	sra-36	cds
B0310.1	0	0	0	0	0	0	0	0	0	0	CHROMOSOME_X	493237	497214	+	WBGene00015137		cds
B0310.2	0	0	0	0	0	0	0.953616	0	0.471125	0.897533	CHROMOSOME_X	501966	506944	-	WBGene00015138		cds
B0310.3	0	0	0	0	0	0	0	0	0	0	CHROMOSOME_X	510819	514534	-	WBGene00015139		cds
B0310.5	0	0	0	0	0	0	0	0	0	0	CHROMOSOME_X	525929	530177	-	WBGene00015141	ugt-46	cds
B0310.6	0	0	0	0	0	0	0	0	0	0	CHROMOSOME_X	530626	530962	-	WBGene00015142		cds
B0331.1	0	0	0	0	0	0	0	0	0	0	CHROMOSOME_V	9654681	9657951	+	WBGene00007140	cyp-29A4	cds
B0331.2	0	0	0	0	0	0	0	0	0	0	CHROMOSOME_V	9658907	9661590	-	WBGene00007141		cds
B0334.1	0	0	0	0	0	0	0	0.819766	0	0	CHROMOSOME_II	11485446	11486710	-	WBGene00007142	ttr-18	cds
B0334.10	0.564296	0	0	0	0	0	0	0	0	0	CHROMOSOME_II	11518424	11519507	+	WBGene00007148		cds
B0334.11	10.5177	18.93	18.3739	23.6516	28.9599	27.2548	21.8942	31.4552	31.3855	25.5899	CHROMOSOME_II	11493167	11495250	-	WBGene00003868	ooc-3	cds
B0334.13	0	0	0	0	0	0	0	0	0	0	CHROMOSOME_II	11488223	11489555	+	WBGene00007149		cds
B0334.15	1.12859	1.68323	2.11318	1.30601	1.16545	1.65612	1.42556	0.819766	1.41337	0.67315	CHROMOSOME_II	11496714	11497996	+	WBGene00195248		cds
B0334.2	0	0.21732	0	0.313904	0.675118	0.387449	1.42556	2.37309	3.80021	0.67315	CHROMOSOME_II	11483137	11485295	-	WBGene00006660	twk-5	cds
B0334.20	0	0	0	0	0	0	0	0	0	0	CHROMOSOME_II	11499579	11500400	-	WBGene00219293		cds
B0334.3	3.05264	4.23171	4.73561	3.5402	4.04068	3.97723	8.09114	7.03306	5.2448	7.70835	CHROMOSOME_II	11489541	11492957	-	WBGene00007143		cds
B0334.4	12.4417	15.299	19.2905	21.2547	22.3067	22.3442	26.1936	13.9799	27.5437	35.1828	CHROMOSOME_II	11495628	11496605	+	WBGene00007144		cds
B0334.5	23.5373	19.5267	19.8151	14.7944	19.0268	17.3902	19.5118	17.8201	16.6662	19.6868	CHROMOSOME_II	11497601	11499559	+	WBGene00007145		cds
B0334.6	0	0	0	0	0	0.140565	1.90723	1.63953	0	0	CHROMOSOME_II	11510611	11513826	+	WBGene00007146		cds
B0334.7	0	0	0	0	0	0	0	0	0	0	CHROMOSOME_II	11515011	11518090	+	WBGene00005267	srh-44	cds
B0334.8	4.29681	3.69042	6.11902	8.79909	8.42086	6.15777	8.56957	11.3482	8.59469	12.0543	CHROMOSOME_II	11519435	11526998	-	WBGene00000090	age-1	cds
B0336.1	10.9664	13.4538	20.0188	18.2067	25.2336	22.9208	21.4028	15.8357	17.6813	8.30897	CHROMOSOME_III	5722804	5727068	+	WBGene00006943	wrm-1	cds
B0336.10	455.965	318.529	276.452	240.47	187.228	178.337	160.462	68.6033	56.8783	20.8812	CHROMOSOME_III	5705468	5706281	-	WBGene00004435	rpl-23	cds
B0336.11	0	0	0	0	0	0	0	0.819766	0	0.749075	CHROMOSOME_III	5706692	5709284	-	WBGene00015148	hpo-28	cds
B0336.12	0	0	0	0	0	0	0	0	0	0	CHROMOSOME_III	5710017	5710464	-	WBGene00015149		cds
B0336.13	10.9664	7.81549	12.7854	11.1611	12.5445	12.8814	11.8991	7.76662	10.0289	12.1201	CHROMOSOME_III	5693991	5695178	+	WBGene00015150		cds
B0336.2	37.3387	40.8714	44.7975	44.4024	38.3564	35.2435	39.0334	41.4648	55.2435	52.7742	CHROMOSOME_III	5716068	5717538	+	WBGene00000182		cds
B0336.3	3.73251	3.90775	2.80488	5.31706	4.85661	5.10533	3.80473	3.19286	5.70552	2.24383	CHROMOSOME_III	5711503	5714579	+	WBGene00015143		cds
B0336.4	0.679874	0.596626	1.70725	1.73424	2.33591	2.60582	5.70872	2.28688	2.38684	5.98921	CHROMOSOME_III	5698390	5702257	+	WBGene00004348	rgs-5	cds
B0336.5	1.24417	6.99752	12.641	15.552	18.7313	22.6397	32.8495	18.3813	22.8221	22.2275	CHROMOSOME_III	5692875	5693893	+	WBGene00015145		cds
B0336.6	10.6332	14.157	14.9989	19.2549	24.219	26.8909	18.0733	22.0914	17.1686	25.0686	CHROMOSOME_III	5690062	5692695	-	WBGene00015146	abi-1	cds
B0336.7	10.6332	10.6286	5.99591	9.17116	7.83369	9.96019	11.4272	5.30732	9.00339	8.23304	CHROMOSOME_III	5694690	5697320	-	WBGene00015147		cds
B0336.8	2.82148	3.90372	5.44709	6.28786	5.98811	6.86418	7.12779	6.2995	2.37643	5.98582	CHROMOSOME_III	5697431	5697964	-	WBGene00002982	lgg-3	cds
B0336.9	4.06565	8.02879	8.78101	8.0725	6.55135	7.14889	6.66233	3.02044	5.2448	1.42222	CHROMOSOME_III	5702210	5705421	-	WBGene00006359	swp-1	cds
B0344.2	0	0	0	0	0	0	0	0	0	0	CHROMOSOME_X	1576630	1590890	+	WBGene00006955	wrt-9	cds
B0348.1	0	0	0	0	0	0	0	0	0	0	CHROMOSOME_V	48922	49619	+	WBGene00015151		cds
B0348.2	0	0	0	0	0	0	0	0	0	0	CHROMOSOME_V	45463	46923	+	WBGene00015152		cds
B0348.4	0	0	0.325332	0.156952	0.140811	2.25262	4.76484	3.66779	4.28174	2.54414	CHROMOSOME_V	20825	43971	+	WBGene00001177	egl-8	cds
B0348.5	0	0	0	0	0.140811	0	0.953616	0	0	0	CHROMOSOME_V	5690	6511	+	WBGene00015153		cds
B0348.6	33.4634	34.3517	43.4566	52.7286	45.6558	33.8685	29.5037	27.5711	21.911	21.4818	CHROMOSOME_V	6589	7822	-	WBGene00002061	ife-3	cds
B0350.2	0	0	0.650665	0.156952	0	1.51555	3.33603	1.46711	4.76327	5.83736	CHROMOSOME_IV	5966644	6004847	+	WBGene00006780	unc-44	cds
B0350.3	0	0	0	0	0	0	0	0	0	0	CHROMOSOME_IV	5965470	5966029	+	WBGene00015154		cds
B0353.1	0	0	0	0	0	0	0	0	0	0	CHROMOSOME_III	557515	572134	+	WBGene00015155		cds
B0361.10	4.41239	7.92616	10.204	10.8337	10.6649	8.44822	9.98864	13.2464	8.57388	17.6673	CHROMOSOME_III	7285933	7287541	-	WBGene00015164	ykt-6	cds
B0361.11	0	0	0	0	0	0	0	0	0	0	CHROMOSOME_III	7277540	7281153	+	WBGene00015165		cds
B0361.2	11.082	17.0295	15.7727	18.1137	22.3545	18.4841	22.8543	25.9316	12.3949	22.9007	CHROMOSOME_III	7293568	7308300	+	WBGene00015156		cds
B0361.3	7.81176	7.91812	5.7922	8.2643	11.8204	9.53491	10.9423	19.8045	17.7229	8.75773	CHROMOSOME_III	7281340	7283892	+	WBGene00015157		cds
B0361.4	0	0	0	0	0	0	0	0	0.471125	0	CHROMOSOME_III	7258949	7268422	+	WBGene00015158		cds
B0361.5	7.34944	9.32869	6.5645	7.27219	7.22647	9.04831	2.8576	4.09883	5.23439	8.90619	CHROMOSOME_III	7268351	7275334	-	WBGene00015159	psd-1	cds
B0361.6	17.4184	29.3061	19.1051	21.2973	17.1874	20.9457	15.2222	21.5741	19.0635	20.8812	CHROMOSOME_III	7275441	7277210	-	WBGene00015160		cds
B0361.7	1.24417	6.39687	12.5011	10.7136	12.4716	11.054	13.3344	18.295	20.4872	12.4272	CHROMOSOME_III	7283857	7285819	-	WBGene00015161	pho-5	cds
B0361.8	6.45201	4.72169	6.72864	5.41785	6.73614	6.65154	2.8576	2.93423	3.32908	1.79507	CHROMOSOME_III	7287783	7290500	-	WBGene00015162		cds
B0361.9	0	0	0	0	1.40811	4.68005	0.475186	1.55332	0.471125	3.29322	CHROMOSOME_III	7298284	7299579	-	WBGene00015163		cds
B0365.1	11.8774	19.8547	24.9369	24.6417	37.1019	44.3838	39.961	40.9037	46.7736	60.6378	CHROMOSOME_V	13116488	13120120	+	WBGene00007150		cds
B0365.3	13.4547	19.914	21.5451	22.237	23.5049	19.3653	27.1375	32.1887	20.0473	20.5809	CHROMOSOME_V	13126392	13129982	-	WBGene00001137	eat-6	cds
B0365.5	0	0	0	0	0	0	0	0	0	0	CHROMOSOME_V	13133735	13134843	-	WBGene00007152	clec-225	cds
B0365.6	0	0	0	0	0	0	0	0	0	0	CHROMOSOME_V	13134950	13138071	-	WBGene00007153	clec-41	cds
B0365.7	0	0	0	0	0	0	0	0	0	0	CHROMOSOME_V	13138966	13152452	+	WBGene00007154	dhc-3	cds
B0365.9	0	0	0	0	0	0	0	0	0	0	CHROMOSOME_V	13131911	13133520	-	WBGene00219208		cds
B0379.1	0	0	0	0	0.106861	0	0	0	0	0	CHROMOSOME_I	10074958	10077739	+	WBGene00007155		cds
B0379.2	0	0	0	0	0	0	0	0	0	0	CHROMOSOME_I	10070912	10071819	-	WBGene00007156		cds
B0379.3	8.94035	11.6166	15.5097	17.8424	19.1198	17.3253	16.1758	18.8123	21.4607	23.805	CHROMOSOME_I	10080141	10086280	+	WBGene00003508	mut-16	cds
B0379.4	1.24417	0.813946	1.93073	0.563874	2.40381	0	0.475186	2.20067	0.471125	0.448767	CHROMOSOME_I	10086381	10102001	-	WBGene00007054	scpl-1	cds
B0379.6	0	0	0	0	0	0	0	0	0	0	CHROMOSOME_I	10097306	10097766	+	WBGene00007158		cds
B0379.7	0	0	0	0	0	0	0	0	0	0	CHROMOSOME_I	10072571	10074376	-	WBGene00007159		cds
B0391.11	0	0	0	0	0	0	0	0	0	0	CHROMOSOME_V	15600341	15602326	-	WBGene00007166	fbxa-152	cds
B0391.12	0	0	0	0	0	0	0	0	0	0	CHROMOSOME_V	15613167	15614949	+	WBGene00006289	str-263	cds
B0391.14	0	0	0	0	0	0	0	0	0	0	CHROMOSOME_V	15599152	15599712	-	WBGene00206462		cds
B0391.3	0	0	0	0	0	0	0	0	0	0	CHROMOSOME_V	15614918	15617592	-	WBGene00007161		cds
B0391.4	0	0	0	0	0	0	0	0	0	0	CHROMOSOME_V	15610871	15612572	+	WBGene00006080	str-12	cds
B0391.5	0	0	0	0	0	1.19659	2.85436	1.46711	0.94225	0.973458	CHROMOSOME_V	15605705	15610361	-	WBGene00007162	fbxa-153	cds
B0391.6	0	0	0	0	0	0	0	0	0	0	CHROMOSOME_V	15602896	15605136	-	WBGene00007163	fbxa-154	cds
B0391.9	0	0.596626	0	0	0	0	0.475186	0	0	0	CHROMOSOME_V	15593443	15593780	-	WBGene00007164	fbxa-139	cds
B0393.1	416.07	303.194	274.193	224.595	178.666	170.564	128.049	45.4774	36.8934	15.4926	CHROMOSOME_III	4752864	4754048	-	WBGene00004469	rps-0	cds
B0393.2	7.24746	17.0416	27.4985	27.2926	31.4945	34.4308	34.7502	29.858	33.218	40.6405	CHROMOSOME_III	4754397	4756984	+	WBGene00007167	rbg-3	cds
B0393.3	10.7352	13.3511	17.1531	18.8345	25.2826	24.076	26.6688	25.5867	19.4722	26.4183	CHROMOSOME_III	4757213	4759696	+	WBGene00007168		cds
B0393.4	0	0	0	0	0	0	0	0	0	0	CHROMOSOME_III	4759707	4763574	-	WBGene00007169		cds
B0393.5	0	0	0	0	0.106861	0.387449	0	0	0	0	CHROMOSOME_III	4765783	4776242	+	WBGene00007170		cds
B0393.6	13.4547	12.3158	14.5109	15.5094	22.6122	16.8208	14.2783	13.8937	14.2482	19.9078	CHROMOSOME_III	4780124	4781946	-	WBGene00007171		cds
B0393.7	0	0	0	0	0	0	0	0	0	0	CHROMOSOME_III	4776229	4778030	-	WBGene00007172		cds
B0393.8	10.9664	9.01276	11.7486	8.5782	8.20827	6.89484	4.76484	0	2.84756	1.3463	CHROMOSOME_III	4751843	4752335	-	WBGene00007173		cds
B0393.9	0	0.596626	0	0.292593	0.602206	0.387449	0	1.46711	1.44459	3.22068	CHROMOSOME_III	4778355	4780123	-	WBGene00044636		cds
B0395.1	0	0	0	0	0	0	0	0	0	0	CHROMOSOME_X	16017447	16021677	+	WBGene00003729	nhx-1	cds
B0395.2	0	0	0	0	0	0	0	0	0	0	CHROMOSOME_X	16030734	16034744	+	WBGene00007174	mboa-1	cds
B0395.3	0	0.21732	0	0.271281	0	0.987537	0	0.733557	1.41337	1.42222	CHROMOSOME_X	16034975	16039442	-	WBGene00007175		cds
B0399.1	0	0	0	0	0	0	0	0	0	0.224383	CHROMOSOME_V	19565356	19606090	+	WBGene00007176	kcnl-1	cds
B0399.2	0	0	0	0	0	0	0	0	0	0	CHROMOSOME_V	19550986	19555842	-	WBGene00007177	oac-1	cds
B0403.2	0	0	0	0	0	0	0	0	0	0.224383	CHROMOSOME_X	7050584	7055330	+	WBGene00006712	ubc-17	cds
B0403.3	0	0	0	0	0	0	0	0	0	0	CHROMOSOME_X	7061805	7063286	-	WBGene00015167		cds
B0403.4	0.679874	0.21732	2.23629	0.992107	1.20441	24.6148	45.2173	24.9833	25.2713	21.6994	CHROMOSOME_X	7066301	7068519	-	WBGene00015168	tag-320	cds
B0403.5	0	0	0	0.135641	0	0.246884	0	0	0	0	CHROMOSOME_X	7057764	7061638	+	WBGene00015169		cds
B0403.6	0	0	0	0	0	0	0	0	0	0	CHROMOSOME_X	7071346	7075293	-	WBGene00043982		cds
B0410.1	0	0	0	0	0	0	0	0	0	0	CHROMOSOME_X	2894564	2895235	+	WBGene00015170		cds
B0410.2	0	0	0.162666	0	0.281622	2.35894	3.80798	2.20067	3.33949	4.26667	CHROMOSOME_X	2885859	2890593	+	WBGene00015171	vang-1	cds
B0410.3	0	0	0	0	0	0	0	0	0	0.749075	CHROMOSOME_X	2890566	2891483	-	WBGene00015172		cds
B0412.1	0	0	0	0	0	0	0	0	0	0	CHROMOSOME_III	816240	821723	+	WBGene00000895	dac-1	cds
B0412.2	0	0	0	0	0	0	0	0	0	0	CHROMOSOME_III	811822	813758	+	WBGene00000903	daf-7	cds
B0412.3	6.10527	8.47147	9.89841	8.95604	10.9126	5.77391	7.61595	4.57376	6.15583	7.33551	CHROMOSOME_III	795131	809434	+	WBGene00015173		cds
B0412.4	218.301	192.862	207.074	159.78	100.162	101.645	60.9795	26.535	26.5911	13.9185	CHROMOSOME_III	794289	795072	+	WBGene00004498	rps-29	cds
B0414.1	0	0	0	0	0	0	0	0	0	0	CHROMOSOME_I	5801875	5803269	+	WBGene00015175	srz-4	cds
B0414.2	0.679874	0	0	0	0	0.387449	0	0	0	0	CHROMOSOME_I	5776157	5788612	+	WBGene00004393	rnt-1	cds
B0414.3	188.074	189.953	139.347	114.786	111.793	118.526	136.596	136.045	125.553	101.103	CHROMOSOME_I	5774588	5775613	+	WBGene00001856	hil-5	cds
B0414.5	9.50464	23.2805	18.4559	22.3165	16.5261	13.5157	18.083	13.0739	17.1165	21.2608	CHROMOSOME_I	5788634	5791755	-	WBGene00000772	cpb-3	cds
B0414.6	2.60392	6.34958	6.91109	6.88658	6.09497	4.75212	11.4304	6.38571	4.79448	6.28612	CHROMOSOME_I	5792327	5795124	-	WBGene00001600	glh-3	cds
B0414.7	7.11829	9.38	12.0314	10.605	13.2725	16.4441	24.2831	14.4548	21.8902	17.1392	CHROMOSOME_I	5795407	5801302	-	WBGene00003472	mtk-1	cds
B0414.8	5.77213	8.1948	12.6014	15.7225	19.9457	19.6392	16.6542	17.9063	13.8395	11.0016	CHROMOSOME_I	5803962	5807294	-	WBGene00015176	vps-51	cds
B0416.1	0	0	0	0	0	0	0	0	0.481529	0	CHROMOSOME_X	9303665	9310424	+	WBGene00015177	tmc-2	cds
B0416.10	0	0	0	0	0.951727	1.47772	1.4288	0	0.481529	0	CHROMOSOME_X	9273679	9274612	-	WBGene00206482		cds
B0416.11	0	0	0	0	0	0	0	0	0	0	CHROMOSOME_X	9281969	9283032	-	WBGene00206483		cds
B0416.2	0	0	0	0	0	0	0	0	0	0	CHROMOSOME_X	9299112	9300072	+	WBGene00015178		cds
B0416.3	0	0	0	0	0	0	0	0	0	0	CHROMOSOME_X	9291592	9293587	+	WBGene00015179		cds
B0416.4	0	0	0.162666	0	1.12649	5.70542	3.33603	3.8402	4.29214	4.33921	CHROMOSOME_X	9278903	9279887	+	WBGene00015180		cds
B0416.5	0.679874	0.21732	0.548813	0.292593	1.90345	17.5722	17.1456	11.5206	11.0023	13.4732	CHROMOSOME_X	9268575	9270794	-	WBGene00015181		cds
B0416.6	0.564296	0.596626	0.223481	0	1.1994	3.90874	3.32955	0.733557	0	1.42222	CHROMOSOME_X	9293607	9296563	-	WBGene00001638	gly-13	cds
B0416.7	0	0	0	0	0	0	0	0	0	0	CHROMOSOME_X	9296886	9297891	-	WBGene00015182		cds
B0432.1	0	0	0	0	0.140811	0.140565	0	0	0	0	CHROMOSOME_II	297399	299527	+	WBGene00015183		cds
B0432.10	1.92404	3.52442	2.03259	2.98986	2.36986	3.87449	0.475186	0.819766	3.80021	0.897533	CHROMOSOME_II	283887	286275	-	WBGene00015191		cds
B0432.11	0	0	0	0	0	0	0	0	0	0	CHROMOSOME_II	293864	294642	-	WBGene00015192		cds
B0432.12	0	0	0	0	0	0	0	0	0	0	CHROMOSOME_II	296275	297017	-	WBGene00015193	clec-117	cds
B0432.13	3.16821	6.29022	5.56872	5.31706	6.58029	6.19918	5.70872	5.47974	5.71592	10.7013	CHROMOSOME_II	278621	282578	-	WBGene00015194		cds
B0432.14	0.679874	0	0.223481	0.720826	0.461395	1.19659	1.42556	0	0.471125	0.448767	CHROMOSOME_II	264353	266305	+	WBGene00044640		cds
B0432.2	14.2502	9.98467	13.0301	16.8212	12.141	8.47888	6.66233	8.58638	13.3788	14.8229	CHROMOSOME_II	290581	291861	+	WBGene00015184		cds
B0432.3	9.83778	12.6438	10.9154	13.3023	8.81435	6.72361	4.28641	2.28688	3.29787	2.31976	CHROMOSOME_II	288937	290399	+	WBGene00015185	mrpl-41	cds
B0432.4	5.54098	6.83956	6.26042	6.65792	5.56066	6.79569	2.37593	5.56595	6.18704	11.3778	CHROMOSOME_II	286625	288850	+	WBGene00015186	misc-1	cds
B0432.5	0	0	0	0	0	0	0	0	0	0	CHROMOSOME_II	258463	261063	+	WBGene00000296	cat-2	cds
B0432.6	0	0	0.162666	0.156952	0	0.387449	0	0	0	0	CHROMOSOME_II	266447	269280	-	WBGene00015187		cds
B0432.7	0	0.21732	0	0	0	0	0	0	0.471125	0	CHROMOSOME_II	269390	273966	-	WBGene00015188		cds
B0432.8	1.80847	3.36243	5.81346	5.72398	6.80905	7.567	9.99512	4.74618	8.10276	4.93982	CHROMOSOME_II	276212	278738	-	WBGene00015189		cds
B0432.9	1.24417	0.75861	0.162666	0.563874	0.422433	0.949708	0.475186	0	0.481529	0	CHROMOSOME_II	282576	283697	-	WBGene00015190		cds
B0454.1	0.679874	1.46591	1.64644	0.585185	1.09755	3.44563	3.33279	4.48755	1.90531	2.62007	CHROMOSOME_II	3056644	3060251	+	WBGene00002997	lin-8	cds
B0454.10	0	0	0	0	0	0	0	0	0	0	CHROMOSOME_II	3046222	3048157	+	WBGene00005542	sri-30	cds
B0454.2	0	0	0	0	0	0	0	0	0	0	CHROMOSOME_II	3051006	3052325	+	WBGene00005543	sri-31	cds
B0454.26	0	0	0	0	0	0	0.475186	0	0	0	CHROMOSOME_II	3036190	3037760	-	WBGene00206372		cds
B0454.3	0	0	0	0	0	0	0	0	0	0	CHROMOSOME_II	3048681	3050438	+	WBGene00005540	sri-28	cds
B0454.4	0	0	0	0	0	0	0	0	0	0	CHROMOSOME_II	3044326	3046118	+	WBGene00005541	sri-29	cds
B0454.5	0	0	0	0	0	0	0	0	0	0	CHROMOSOME_II	3038862	3040825	+	WBGene00015196		cds
B0454.6	0	0	0	0	0	0	0	0	0	0	CHROMOSOME_II	3032783	3036120	+	WBGene00015197		cds
B0454.7	0	0	0	0	0	0	0	0	0	0	CHROMOSOME_II	3020564	3023434	-	WBGene00015198	clec-2	cds
B0454.8	0	0	0	0	0	0	0	0	0	0	CHROMOSOME_II	3040943	3043409	-	WBGene00015199		cds
B0454.9	0	0.379305	0.162666	0	0.140811	6.5488	4.76159	6.94685	4.27133	3.29322	CHROMOSOME_II	3052599	3054351	-	WBGene00015200		cds
B0457.1	8.02932	7.2742	17.4587	13.3023	17.6137	15.1412	11.8991	19.1571	29.993	31.3683	CHROMOSOME_II	8896780	8908592	+	WBGene00002251	lat-1	cds
B0457.2	0	0	0	0	0	0	0	0	0	0	CHROMOSOME_II	8924510	8926517	-	WBGene00007178		cds
B0457.4	0	0	0	0	0	0	0	0	0	0	CHROMOSOME_II	8910852	8911968	-	WBGene00007179		cds
B0457.6	0.564296	0	0	0	0.213723	0.246884	0	0.733557	0	0	CHROMOSOME_II	8922390	8924311	+	WBGene00007180		cds
B0462.1	0	0	0	0	0	0	0	0	0	0	CHROMOSOME_V	18324994	18328763	+	WBGene00007181		cds
B0462.3	0	0	0	0	0	0	0	0	0	0	CHROMOSOME_V	18318567	18319748	+	WBGene00007182	fbxb-119	cds
B0462.4	0	0	0	0	0	0	0	0	0	0	CHROMOSOME_V	18329084	18331151	-	WBGene00007183		cds
B0462.5	0	0	0	0	0	0	0	0	0	0	CHROMOSOME_V	18322187	18323299	-	WBGene00194695		cds
B0464.1	85.1815	59.0941	61.1571	66.5714	55.5526	40.9832	47.5932	50.4822	66.1626	58.9118	CHROMOSOME_III	9489078	9491152	-	WBGene00001094	dars-1	cds
B0464.2	16.0586	22.0751	20.893	21.6092	20.0086	24.1517	17.6111	28.2623	30.4849	20.9571	CHROMOSOME_III	9491220	9497236	+	WBGene00007184		cds
B0464.3	13.1216	10.526	14.6948	14.8583	14.5837	17.6064	29.9789	19.8484	28.1189	38.0272	CHROMOSOME_III	9488534	9489102	+	WBGene00007185	nlp-36	cds
B0464.4	1.92404	8.57008	13.2931	10.0489	14.0444	12.6723	13.7966	18.3813	21.9943	15.4926	CHROMOSOME_III	9469842	9485367	-	WBGene00000268	bre-3	cds
B0464.5	37.5291	38.4647	43.0309	41.2265	40.4635	33.2792	24.7389	28.9959	28.1813	38.5553	CHROMOSOME_III	9456479	9462876	+	WBGene00004980	spk-1	cds
B0464.6	8.81117	10.5773	9.73575	8.55689	9.73714	8.76718	12.3743	7.5942	11.8822	15.2682	CHROMOSOME_III	9462900	9465881	-	WBGene00007186		cds
B0464.7	19.1113	26.3743	23.1307	30.7202	20.5379	19.742	20	11.8654	21.7654	13.1695	CHROMOSOME_III	9467373	9467982	+	WBGene00000235	baf-1	cds
B0464.8	7.34944	6.56288	6.68613	5.06709	6.26973	5.20806	5.71196	3.92641	5.69511	3.44167	CHROMOSOME_III	9468072	9470450	+	WBGene00007187	tag-342	cds
B0464.9	4.52796	8.73609	11.9097	11.3123	11.0924	9.92236	11.9088	14.7997	6.66857	9.57934	CHROMOSOME_III	9465689	9467064	+	WBGene00007188		cds
B0478.1	0	0	0	0.135641	0	0.140565	0	0	0.471125	0.749075	CHROMOSOME_IV	6957630	6963705	+	WBGene00002178	jnk-1	cds
B0478.3	0	0	0	0	0	0	0	0	0	0	CHROMOSOME_IV	6963864	6964551	-	WBGene00015202		cds
B0491.1	1.69289	7.81147	6.66635	6.13091	8.32402	8.62303	7.14077	9.23373	5.6743	5.08828	CHROMOSOME_II	11348366	11350312	+	WBGene00007189		cds
B0491.2	0	0	0	0	0	0	0	0	0	0	CHROMOSOME_II	11336627	11337771	-	WBGene00005016	sqt-1	cds
B0491.3	0	0	0	0	0	0	0	0	0	0	CHROMOSOME_II	11338386	11339535	-	WBGene00007190	rmd-3	cds
B0491.4	0	0	0	0	0	0	0	0	0	0	CHROMOSOME_II	11340070	11343466	-	WBGene00007191	lgc-20	cds
B0491.5	14.1346	16.8202	15.3865	19.4603	14.458	13.094	14.7567	14.8859	16.6246	19.9871	CHROMOSOME_II	11343652	11345679	-	WBGene00007192		cds
B0491.6	3.61693	5.09697	4.3905	3.2476	4.7837	5.10174	2.8576	3.754	0.94225	4.78797	CHROMOSOME_II	11345881	11347893	-	WBGene00007193		cds
B0491.7	7.69618	9.6607	7.56175	9.78342	5.42487	4.61156	4.76159	3.02044	1.90531	1.87099	CHROMOSOME_II	11350126	11351311	+	WBGene00007194		cds
B0491.8	0	0	0	0	0	0	0	0	0	0	CHROMOSOME_II	11358383	11370248	+	WBGene00000529	clh-2	cds
B0495.1	0	0	0	0	0.106861	0	0	0	0	0	CHROMOSOME_II	7709736	7711391	+	WBGene00005149	sre-1	cds
B0495.10	0	0	0	0	0	0	0	0	0.963057	0.224383	CHROMOSOME_II	7711818	7718538	-	WBGene00007044	cpna-5	cds
B0495.2	12.5437	13.8884	10.1827	11.8393	12.4565	10.845	7.13752	10.2259	10.5104	5.46452	CHROMOSOME_II	7699201	7702251	+	WBGene00015203		cds
B0495.4	0	0	0	0	0	0	0	0	0	0	CHROMOSOME_II	7690656	7693906	-	WBGene00003730	nhx-2	cds
B0495.5	0	2.54849	2.96755	2.00553	2.36986	2.35536	0	0	0	1.12192	CHROMOSOME_II	7695883	7698454	-	WBGene00015204		cds
B0495.6	6.55399	8.74011	11.4247	10.3686	10.4612	8.83209	5.23353	10.2259	11.8926	11.0016	CHROMOSOME_II	7698561	7699125	-	WBGene00015205		cds
B0495.7	19.56	14.0504	11.1997	11.1689	14.9333	16.0602	16.179	13.8937	16.6558	13.6976	CHROMOSOME_II	7701895	7705182	-	WBGene00015206		cds
B0495.8	18.4314	9.22606	14.8165	13.4244	13.9526	19.7185	15.2319	12.5128	14.3314	15.0439	CHROMOSOME_II	7705482	7707430	-	WBGene00015207		cds
B0495.9	14.2502	9.65668	11.1587	10.2989	8.72253	10.6702	3.80798	6.86064	4.27133	4.04229	CHROMOSOME_II	7707529	7708663	-	WBGene00015208		cds
B0496.1	0	0	0	0	0	0	0	0	0	0	CHROMOSOME_IV	7446379	7447452	+	WBGene00015210		cds
B0496.11	0	0	0	0	0	0	0	0	0	0	CHROMOSOME_IV	7433537	7433947	-	WBGene00194883		cds
B0496.2	0	0	0	0	0	0	0	0	0	0	CHROMOSOME_IV	7447845	7449363	+	WBGene00015211		cds
B0496.3	0	0.21732	0.325332	0	0	0	0	0	0.963057	0	CHROMOSOME_IV	7424485	7444651	+	WBGene00006814	unc-82	cds
B0496.5	0	0	0	0	0	0	0	0	0	0	CHROMOSOME_IV	7420947	7422660	+	WBGene00015214	srtx-1	cds
B0496.6	0	0	0	0	0	0	0	0	0	0	CHROMOSOME_IV	7419141	7419960	+	WBGene00015215		cds
B0496.7	0	0.21732	0	0.428233	0.247672	0.421694	0.953616	0	0	0	CHROMOSOME_IV	7444623	7445354	-	WBGene00015216	valv-1	cds
B0496.8	0	0	0.325332	0	0.320584	0.528014	6.19039	3.19286	1.90531	0.448767	CHROMOSOME_IV	7449073	7451434	-	WBGene00015217	tes-1	cds
B0507.1	0	0	0	0	0	0.881218	0.950372	0	0	0	CHROMOSOME_V	8776634	8779271	+	WBGene00015218		cds
B0507.10	0	0	0	0	0	0	0	0	0	0	CHROMOSOME_V	8758798	8760494	-	WBGene00015227		cds
B0507.11	0	0	0	0	0	0	0	0	0	0	CHROMOSOME_V	8771877	8773759	+	WBGene00006006	srx-115	cds
B0507.15	0	0	0	0	0	0	0	0	0	0	CHROMOSOME_V	8751862	8752992	+	WBGene00202499		cds
B0507.2	0	0	0	0	0.247672	0.774898	3.32955	2.28688	0.471125	3.5176	CHROMOSOME_V	8774310	8776494	+	WBGene00015219		cds
B0507.3	0	0	0	0	0	0	0	0	0	0	CHROMOSOME_V	8768887	8770854	+	WBGene00015220		cds
B0507.4	0	0	0	0	0	0	0	0	0	0	CHROMOSOME_V	8754948	8755737	+	WBGene00015221		cds
B0507.5	0	0	0	0	0	0	0	0	0	0	CHROMOSOME_V	8753673	8754851	+	WBGene00015222		cds
B0507.6	0	0.21732	0	0	0	0	0	0	0	0	CHROMOSOME_V	8746136	8750171	+	WBGene00015223		cds
B0507.7	0	0	0	0	0	0	0	0	0	0	CHROMOSOME_V	8756468	8758698	-	WBGene00015224		cds
B0507.8	0	0	0	0	0	0	0	0	0	0	CHROMOSOME_V	8760665	8763172	-	WBGene00015225		cds
B0507.9	0	0	0	0	0	0	0	0	0	0	CHROMOSOME_V	8764866	8766016	-	WBGene00015226		cds
B0511.1	0	0.21732	0.162666	0	0	0.634333	0	0	0.481529	0.224383	CHROMOSOME_I	10667944	10671005	+	WBGene00001432	fkb-7	cds
B0511.10	10.6332	13.6198	12.1955	13.7015	11.4269	7.39578	11.4239	15.7919	5.70552	7.18366	CHROMOSOME_I	10640382	10642272	-	WBGene00001228		cds
B0511.11	0	2.65514	0.893923	1.41257	0.422433	0.668579	1.42556	0	0.481529	0.448767	CHROMOSOME_I	10648590	10654168	-	WBGene00015236		cds
B0511.12	3.50135	11.0632	11.4628	12.0602	14.355	13.941	18.096	24.3359	14.2898	14.1463	CHROMOSOME_I	10654287	10666866	-	WBGene00015237		cds
B0511.13	12.095	12.5332	14.7557	16.2225	15.4926	13.2346	19.5183	11.1319	15.6824	20.7361	CHROMOSOME_I	10633179	10636006	-	WBGene00015238		cds
B0511.17	0	0	0	0	0	0	0	0	0	0	CHROMOSOME_I	10643018	10643713	+	WBGene00219234		cds
B0511.2	0.564296	1.03127	0.711479	0.835155	1.23836	0.528014	0	0	0.963057	1.72253	CHROMOSOME_I	10651019	10653032	+	WBGene00015228		cds
B0511.3	0	0	0	0	0.140811	0	0	0	0	0	CHROMOSOME_I	10646751	10647766	+	WBGene00015229	fbxa-125	cds
B0511.4	0	0	0	0	0	0	0	0	0	0	CHROMOSOME_I	10644273	10645606	+	WBGene00015230	tag-344	cds
B0511.5	0	0.21732	0	0	0.106861	0.140565	0	0	0	0	CHROMOSOME_I	10628732	10631662	+	WBGene00015231	cutl-14	cds
B0511.6	36.5297	28.7135	28.5778	27.4029	22.8449	19.468	19.0399	10.2259	13.3163	10.18	CHROMOSOME_I	10625370	10628376	+	WBGene00015232		cds
B0511.7	3.61693	5.80427	6.38205	8.50073	6.73614	8.02653	7.14077	4.57376	8.58428	8.68181	CHROMOSOME_I	10631640	10633141	-	WBGene00015233		cds
B0511.8	8.1449	8.46745	7.11331	11.5894	6.80404	4.53948	5.24002	4.83239	6.16624	3.74198	CHROMOSOME_I	10636682	10638966	-	WBGene00044321	mrps-30	cds
B0511.9	15.9431	25.2243	31.6502	28.6703	22.4575	17.8569	22.8414	22.3939	17.6397	21.33	CHROMOSOME_I	10639075	10640219	-	WBGene00015235	cdc-26	cds
B0513.1	0	0	0	0	0.140811	0.634333	0.475186	2.37309	0.481529	0.897533	CHROMOSOME_IV	13888064	13892988	+	WBGene00001562	lin-66	cds
B0513.2	21.0353	25.7183	27.0303	25.6629	15.8082	18.8787	15.2287	14.6273	12.8556	11.15	CHROMOSOME_IV	13882707	13884152	+	WBGene00007195		cds
B0513.3	357.281	286.884	279.956	209.006	158.85	142.158	106.691	45.3473	29.8161	14.8161	CHROMOSOME_IV	13882169	13882638	+	WBGene00004443	rpl-29	cds
B0513.4	2.7195	4.06973	7.21516	15.1062	15.8549	25.1157	77.1261	84.4829	53.3382	94.2838	CHROMOSOME_IV	13880113	13881521	+	WBGene00007196		cds
B0513.5	0	0	0	0.449544	0.213723	1.16235	0.475186	0	1.43418	2.92037	CHROMOSOME_IV	13868529	13876592	-	WBGene00007197		cds
B0513.6	0	0	0	0	0	0.140565	0	0	0	0	CHROMOSOME_IV	13854330	13857326	+	WBGene00007198		cds
B0513.9	0	0	0	0	0	0	0	0	0	0	CHROMOSOME_IV	13860119	13865269	-	WBGene00007200		cds
B0523.1	0	0.379305	0	0	0.140811	0	0	0	0	0	CHROMOSOME_III	8671623	8673545	+	WBGene00002212	kin-31	cds
B0523.3	11.9794	13.0785	14.8575	13.4031	9.66925	6.1956	7.14077	8.58638	7.60042	5.31267	CHROMOSOME_III	8670464	8674970	-	WBGene00003993	pgl-2	cds
B0523.5	9.7222	8.5741	6.32124	5.96618	8.81435	9.71689	5.71521	12.599	7.1397	5.38859	CHROMOSOME_III	8675441	8683612	-	WBGene00001443	fli-1	cds
B0524.2	0	0	0	0	0	0	0	0	0	0	CHROMOSOME_III	1894049	1899847	+	WBGene00015241		cds
B0524.3	0	0	0	0	0	0	0	0	0	0	CHROMOSOME_III	1887549	1889682	+	WBGene00015242		cds
B0524.4	0	0	0	0	0	0	0	0	0	0	CHROMOSOME_III	1883598	1886209	-	WBGene00015243		cds
B0524.5	0	0	0	0	0	0	0	0	0	0	CHROMOSOME_III	1891374	1893833	-	WBGene00015244		cds
B0524.6	0	0.379305	0	0.449544	0.140811	0.140565	0	0	0	0.224383	CHROMOSOME_III	1902184	1905631	-	WBGene00015245		cds
B0545.1	0	0	0	0	0	0	0	0	0	0	CHROMOSOME_IV	92016	110361	+	WBGene00006599	tpa-1	cds
B0545.3	0	0	0	0	0	0	0	0	0	0	CHROMOSOME_IV	86875	90082	-	WBGene00015246	scl-23	cds
B0545.4	0	0.21732	0.487998	0.542563	0.427445	0.387449	5.71521	3.19286	0.952653	1.57068	CHROMOSOME_IV	109054	109943	-	WBGene00015247		cds
B0546.1	58.9247	63.0733	63.249	81.8424	52.1481	50.7379	48.5403	62.7364	62.4144	63.7791	CHROMOSOME_IV	3385635	3386904	+	WBGene00015248	mai-2	cds
B0546.2	6.10527	9.00472	8.80079	11.4693	9.89299	10.2791	13.3344	9.31994	10.0081	11.8991	CHROMOSOME_IV	3373391	3378129	-	WBGene00015249		cds
B0546.3	0	0	0	0	0.106861	0	0	0	0	0	CHROMOSOME_IV	3378788	3382831	-	WBGene00015250		cds
B0546.4	6.33643	6.61822	6.09776	7.3439	8.17319	9.36727	12.3775	7.85283	7.61082	13.7769	CHROMOSOME_IV	3382947	3384144	-	WBGene00015251		cds
B0546.5	0	0	0	0	0	0	0	0	0	0	CHROMOSOME_IV	3388073	3390084	-	WBGene00015252		cds
B0547.1	14.3657	26.4809	22.7248	25.9846	28.4356	26.6818	24.2637	27.9598	26.6951	25.5275	CHROMOSOME_IV	5649520	5651070	+	WBGene00000817	csn-5	cds
B0547.2	0	0	0	0	0	0	0	0	0	0	CHROMOSOME_IV	5645820	5646222	+	WBGene00015253		cds
B0547.4	0	0	0	0	0	0	0	0	0	0	CHROMOSOME_IV	5643241	5645603	-	WBGene00005086	srd-8	cds
B0554.1	0	0	0	0	0	0	0	0	0	0	CHROMOSOME_V	438402	438675	+	WBGene00015254		cds
B0554.2	0	0	0	0	0	0	0	0	0	0	CHROMOSOME_V	434769	436727	+	WBGene00015255		cds
B0554.3	0	0	0	0	0	0	0	0	0	0	CHROMOSOME_V	434149	434402	+	WBGene00015256		cds
B0554.4	0	0	0	0	0	0	0	0	0	0	CHROMOSOME_V	430455	433575	+	WBGene00015257		cds
B0554.5	0	0	0	0	0	0	0	0	0	0	CHROMOSOME_V	424441	426561	+	WBGene00015258		cds
B0554.6	0	0	0	0	0	0	0	0	0	0	CHROMOSOME_V	422499	424167	+	WBGene00015259	dod-20	cds
B0554.7	0	0	0	0	0	0	0	0	0	0	CHROMOSOME_V	437577	441024	-	WBGene00015260		cds
B0563.1	0	0	0	0	0	0	0	0	0	0	CHROMOSOME_X	9171505	9172147	+	WBGene00015261		cds
B0563.10	0	0	0	0	0	0	0	0	0	0	CHROMOSOME_X	9166691	9167199	-	WBGene00077673		cds
B0563.18	0	0	0	0	0	0	0	0	0	0	CHROMOSOME_X	9172521	9173261	+	WBGene00206365		cds
B0563.2	0	0	0	0	0	0	0	0	0	0	CHROMOSOME_X	9163107	9165950	+	WBGene00006637	tsp-11	cds
B0563.4	0.679874	0.434641	0.223481	0.449544	0.106861	3.98081	3.33279	3.8402	3.80021	3.96637	CHROMOSOME_X	9150635	9160597	+	WBGene00006479	tmbi-4	cds
B0563.5	0	0	0	0	0	0	0	0.819766	0	0	CHROMOSOME_X	9146059	9147498	+	WBGene00015262		cds
B0563.6	0	0	0	0.135641	0	0	0	0	0	0.224383	CHROMOSOME_X	9137870	9145538	+	WBGene00015263		cds
B0563.7	0	0	0	0	0	0	0	0	0	0	CHROMOSOME_X	9152378	9154127	-	WBGene00015264		cds
B0563.8	0	0	0	0	0	0	0.475186	0	0.481529	0	CHROMOSOME_X	9173628	9174433	-	WBGene00015265		cds
B0563.9	0	0	0	0	0	0	0	0	0	0	CHROMOSOME_X	9168482	9168965	+	WBGene00044687		cds
B0564.1	18.2138	19.3767	17.6228	17.6699	13.5791	13.6905	10.952	7.11927	6.62696	10.9982	CHROMOSOME_IV	13098954	13100592	+	WBGene00007201		cds
B0564.10	0	0	0	0	0	0	0	0	0	0	CHROMOSOME_IV	13119072	13124363	+	WBGene00006766	unc-30	cds
B0564.11	3.28379	9.00472	5.73139	6.35956	10.2375	8.23917	7.14077	0.733557	1.90531	5.76482	CHROMOSOME_IV	13105299	13106902	+	WBGene00023421		cds
B0564.2	1.80847	3.20045	4.04539	3.92581	3.15685	2.88695	3.80473	0.819766	1.8949	0.448767	CHROMOSOME_IV	13107633	13111479	+	WBGene00007202		cds
B0564.3	0	0	0	0	0	0	0	0	0	0	CHROMOSOME_IV	13108116	13109775	-	WBGene00007203		cds
B0564.4	0	0	0	0	0	0	0	0	0	0	CHROMOSOME_IV	13111496	13113058	-	WBGene00007204		cds
B0564.6	0	0	0	0.271281	0	0.281129	0	0	0	0	CHROMOSOME_IV	13130416	13133206	+	WBGene00007206		cds
B0564.7	7.0163	7.81549	5.62954	6.34402	5.46383	5.52702	4.28316	2.37309	2.37643	3.66606	CHROMOSOME_IV	13100689	13104855	+	WBGene00007207		cds
B0564.9	0	0	0	0.271281	0	0.281129	0	0	0	0	CHROMOSOME_IV	13136008	13138798	+	WBGene00007208		cds
BE0003N10.1	3.61693	4.72169	5.32546	5.73752	4.69575	3.59336	2.85436	4.74618	7.16051	6.36205	CHROMOSOME_III	1037499	1046264	+	WBGene00015266		cds
BE0003N10.2	2.93706	8.29742	7.54049	6.75094	5.4538	6.68937	9.52643	4.57376	6.67898	9.65866	CHROMOSOME_III	1031304	1037202	-	WBGene00015267	chin-1	cds
BE0003N10.3	0.679874	1.68323	1.26029	1.66254	0.602206	2.11206	1.90399	1.46711	0.952653	2.09537	CHROMOSOME_III	1046238	1060000	-	WBGene00015268		cds
BE10.1	0	0	0	0	0	0	0	0	0	0	CHROMOSOME_III	12787578	12789376	-	WBGene00007209		cds
BE10.2	0	0	0	0	0.106861	0	0	0	0	0	CHROMOSOME_III	12793283	12798056	-	WBGene00007210	agmo-1	cds
BE10.3	0	0	0	0	0	0	0	0	0	0	CHROMOSOME_III	12807990	12811549	+	WBGene00007211		cds
BE10.4	0.679874	0.379305	0	0	0	0	0	0	0	0.224383	CHROMOSOME_III	12813414	12816697	+	WBGene00007212		cds
BE10.5	0	0	0	0	0	0	0	0	0	0	CHROMOSOME_III	12806109	12806754	-	WBGene00044127		cds
C01A2.1	0	0	0	0	0	0.140565	0	0	0	0	CHROMOSOME_I	13410146	13411440	-	WBGene00007213		cds
C01A2.2	0	0.21732	0	0	0	0	0	0	0	0	CHROMOSOME_I	13397257	13398517	+	WBGene00007214		cds
C01A2.3	4.8611	7.05286	4.1868	3.33285	3.43346	2.56799	0.950372	0.819766	0.94225	2.09537	CHROMOSOME_I	13387806	13391439	+	WBGene00007215		cds
C01A2.4	5.09226	9.98065	13.0894	11.3976	13.0587	12.8471	14.2848	9.23373	9.07622	12.1994	CHROMOSOME_I	13392105	13393990	+	WBGene00007216		cds
C01A2.5	11.8774	14.9197	14.6934	13.0039	15.4486	11.6884	8.09763	8.58638	7.60042	10.6287	CHROMOSOME_I	13384741	13387073	+	WBGene00007217		cds
C01A2.6	0	0	0	0.135641	0	0	0	0	0	0	CHROMOSOME_I	13379906	13384360	+	WBGene00007218		cds
C01A2.7	0	0	0	0	0	0	0	0	0	0	CHROMOSOME_I	13402436	13404088	+	WBGene00007219	nlp-38	cds
C01A2.9	0	0	0	0	0	0	0	0	0	0	CHROMOSOME_I	13376865	13377336	+	WBGene00077546		cds
C01B10.10	0	0	0	0	0	0	0	0	0	0	CHROMOSOME_IV	6624360	6627981	-	WBGene00015284		cds
C01B10.11	0	0	0.162666	0	0	0	0	0	0	0	CHROMOSOME_IV	6657968	6660425	+	WBGene00044294		cds
C01B10.3	0	0	0	0	0	0.634333	0	0	0	0	CHROMOSOME_IV	6619032	6621341	-	WBGene00015278		cds
C01B10.4	0	0	0	0	0	0	0	0	0	0	CHROMOSOME_IV	6628342	6631734	-	WBGene00015279		cds
C01B10.44	0	0	0	0	0	0	0	0	0	0	CHROMOSOME_IV	6623679	6624482	+	WBGene00194839		cds
C01B10.5	0	0.21732	0.975997	0.292593	0.354534	0.246884	0	0	0	0	CHROMOSOME_IV	6646023	6646928	+	WBGene00001858	hil-7	cds
C01B10.6	0	0	0	0	0	0	0	0	0	0.224383	CHROMOSOME_IV	6640150	6645341	+	WBGene00015280		cds
C01B10.7	0	0	0	0	0	0	0	0	0	0	CHROMOSOME_IV	6638545	6639253	+	WBGene00015281		cds
C01B10.8	15.3924	8.74011	7.37783	10.7542	9.19783	5.70183	8.09438	4.48755	7.64203	7.78427	CHROMOSOME_IV	6635028	6638147	+	WBGene00015282		cds
C01B10.9	6.22085	4.01439	8.63812	6.96606	9.74216	14.8186	4.27992	10.9595	16.6558	12.6482	CHROMOSOME_IV	6632211	6634987	+	WBGene00015283		cds
C01B12.1	0	0	0	0	0	0	0	0	0.481529	0	CHROMOSOME_II	23328	24457	+	WBGene00005017	sqt-2	cds
C01B12.2	0.564296	0.596626	0.548813	0.135641	1.72869	11.3316	8.09114	7.5942	4.75286	6.28612	CHROMOSOME_II	19538	22170	+	WBGene00015285	gmeb-1	cds
C01B12.3	0	0	0	0	0	0	0	0	0	0	CHROMOSOME_II	12985	16001	+	WBGene00015286		cds
C01B12.4	0	0	0	0	0	0	0	0	0	0	CHROMOSOME_II	6664	9233	+	WBGene00015287		cds
C01B12.5	0	0	0	0	0	0	0	0	0	0	CHROMOSOME_II	9808	11846	-	WBGene00015288		cds
C01B12.8	1.69289	5.101	6.62531	5.92356	6.06102	6.51456	5.23353	7.03306	4.75286	4.93982	CHROMOSOME_II	24761	25435	+	WBGene00015291		cds
C01B4.1	0	0	0	0	0	0	0	0	0	0	CHROMOSOME_V	2517529	2521770	+	WBGene00006283	str-257	cds
C01B4.10	0	0	0	0	0	0	0	0	0	0	CHROMOSOME_V	2514233	2515592	-	WBGene00006136	str-76	cds
C01B4.3	0	0	0	0	0	0	0	0	0	0	CHROMOSOME_V	2509635	2513267	+	WBGene00006284	str-258	cds
C01B4.5	0	0	0	0	0	0	0	0	0	0	CHROMOSOME_V	2502763	2504913	+	WBGene00005138	srd-61	cds
C01B4.6	0	0	0	0	0	2.04356	6.19364	1.63953	0.481529	2.54414	CHROMOSOME_V	2501050	2502425	+	WBGene00015270		cds
C01B4.7	0.564296	0	0.162666	0.135641	0	0.387449	0	0	0	0	CHROMOSOME_V	2494234	2499000	+	WBGene00015271		cds
C01B4.8	0	0	0	0	0	0	0	0	0	0	CHROMOSOME_V	2490511	2492700	+	WBGene00015272		cds
C01B4.9	0	0.379305	0	0	0	0.140565	0	0	0	0	CHROMOSOME_V	2483003	2487784	-	WBGene00015273		cds
C01B7.1	0	0	0	0	0.106861	2.53733	4.28316	0.819766	3.3603	3.14476	CHROMOSOME_V	8786529	8792753	+	WBGene00015274	ztf-12	cds
C01B7.3	0	0	0	0	0	0	0	0	0	0	CHROMOSOME_V	8783400	8784143	-	WBGene00015275		cds
C01B7.4	0.564296	0	0.162666	0	0	0	0	0	0.471125	0	CHROMOSOME_V	8792674	8795545	-	WBGene00006467	tag-117	cds
C01B7.5	0	0	0	0	0	0	0	0	0	0	CHROMOSOME_V	8800129	8800974	-	WBGene00015276		cds
C01B7.6	0	0	0	0	0.388483	1.47772	1.90723	1.55332	1.91571	2.92037	CHROMOSOME_V	8805394	8819933	-	WBGene00004457	rpm-1	cds
C01B7.7	0	0	0	0	0.140811	0	0	0	0	0	CHROMOSOME_V	8821844	8822536	-	WBGene00015277		cds
C01B9.1	0	0	0	0	0	0	0	0	0	0	CHROMOSOME_II	13771506	13778956	+	WBGene00007220		cds
C01B9.4	0	0	0	0	0	0	0	0	0	0	CHROMOSOME_II	13770770	13783947	-	WBGene00194890		cds
C01C10.1	0	0	0	0	0.140811	1.47772	0	0	0	0.224383	CHROMOSOME_X	7431425	7433490	+	WBGene00000523	clc-2	cds
C01C10.2	0	0	0	0	0	0	0	0	0	0	CHROMOSOME_X	7435592	7437936	-	WBGene00015294		cds
C01C10.3	0	0	0	0	0	0	0	0	0.94225	0.897533	CHROMOSOME_X	7439354	7442534	-	WBGene00015295	acl-12	cds
C01C10.4	0	0	0	0.135641	0	0	0	0	0.471125	0	CHROMOSOME_X	7433587	7435688	+	WBGene00000526	clc-5	cds
C01C4.1	0	0	0	0	0	0	0	0	0	0	CHROMOSOME_X	3727560	3728424	+	WBGene00003739	nlp-1	cds
C01C4.2	0	0	0	0	0	0	0	0	0	0	CHROMOSOME_X	3716301	3718629	+	WBGene00015292		cds
C01C4.3	0	0	0	0	0	0	0	0	0	0.224383	CHROMOSOME_X	3706729	3713318	+	WBGene00015293		cds
C01C7.1	2.48834	4.66233	7.72442	9.14208	11.6695	15.0727	22.8349	15.447	22.403	11.15	CHROMOSOME_IV	12622061	12630999	-	WBGene00000186	ark-1	cds
C01F1.1	16.3918	22.8931	20.9736	15.9647	18.4146	12.1786	15.2319	11.1319	12.3741	11.4503	CHROMOSOME_II	4301609	4305289	+	WBGene00015296		cds
C01F1.2	5.30982	10.9053	12.1955	12.3393	8.81937	6.40824	6.66882	7.11927	4.74246	5.98582	CHROMOSOME_II	4299660	4301276	+	WBGene00015297	sco-1	cds
C01F1.3	0	0	0	0	0	0	0	0	0	0	CHROMOSOME_II	4295103	4299213	+	WBGene00015298		cds
C01F1.4	0	0	0	0.135641	0	0.281129	0	0	1.43418	0	CHROMOSOME_II	4276216	4279270	+	WBGene00015299		cds
C01F1.5	0	0	0	0	0	0	0	0	0	0	CHROMOSOME_II	4279791	4281830	-	WBGene00015300		cds
C01F1.6	0.679874	0.21732	4.36924	3.48203	4.31228	5.45853	6.66233	8.41397	4.31295	4.26667	CHROMOSOME_II	4282281	4288212	-	WBGene00015301		cds
C01F4.2	0	0	0	0	0	0	0.475186	0	0	0	CHROMOSOME_I	4850683	4867826	-	WBGene00015303	rga-6	cds
C01F6.1	3.05264	6.94219	7.41886	9.12854	14.6177	12.9228	10.939	13.3326	16.1951	9.65187	CHROMOSOME_IV	9096825	9099472	+	WBGene00007221	cpna-3	cds
C01F6.14	1.80847	0.434641	0.223481	0.292593	0.106861	0.387449	0	0	0	0	CHROMOSOME_IV	9103882	9104106	-	WBGene00219207		cds
C01F6.2	0	0.21732	0.162666	0	0.320584	0.140565	0.475186	0	0	0	CHROMOSOME_IV	9099248	9101570	+	WBGene00007222		cds
C01F6.4	4.18123	6.13226	10.2846	10.2059	15.2349	15.6998	15.2287	10.8733	9.50573	16.9148	CHROMOSOME_IV	9104951	9107595	+	WBGene00001413	fem-3	cds
C01F6.5	0	0.21732	0.487998	0	0.140811	1.51555	3.81122	3.8402	6.19745	4.49106	CHROMOSOME_IV	9108916	9109736	+	WBGene00000120	aly-1	cds
C01F6.6	0.679874	0	0.223481	0.156952	0.422433	0.281129	0	1.55332	0	0.749075	CHROMOSOME_IV	9119082	9130356	+	WBGene00006438	tag-60	cds
C01F6.8	34.2589	45.581	38.7788	47.929	36.1474	34.9481	27.1472	29.5131	27.6269	25.3689	CHROMOSOME_IV	9094532	9095640	-	WBGene00002046	icln-1	cds
C01F6.9	37.7602	30.938	32.1931	35.2234	23.3691	18.9778	21.4223	17.4314	24.6441	13.6148	CHROMOSOME_IV	9095739	9096218	-	WBGene00007223		cds
C01G10.1	0	0	0	0	0	0	0	0	0	0	CHROMOSOME_V	15099730	15104787	+	WBGene00007230		cds
C01G10.10	3.28379	5.31832	4.55317	5.61743	4.31228	2.4995	3.33279	1.46711	0.471125	3.06883	CHROMOSOME_V	15080124	15082462	-	WBGene00007237		cds
C01G10.11	6.33643	14.2677	16.545	19.691	22.9757	21.2918	13.7934	30.2467	22.3301	26.7945	CHROMOSOME_V	15071739	15080127	+	WBGene00006808	unc-76	cds
C01G10.12	1.12859	1.0866	2.31688	2.76897	1.4571	1.47772	3.32955	0	1.41337	0.973458	CHROMOSOME_V	15068673	15069490	+	WBGene00001021	dnj-3	cds
C01G10.14	0	0	0	0	0	0	0	0	0	0	CHROMOSOME_V	15105359	15105910	-	WBGene00007239		cds
C01G10.15	0	0	0	0	0	0	0	0	0	0	CHROMOSOME_V	15086934	15087279	-	WBGene00007240		cds
C01G10.16	0	0	0	0	0	0	0	0	0	0	CHROMOSOME_V	15092949	15094321	+	WBGene00007241		cds
C01G10.17	0	0	0	0	0	0	0	0	0	0	CHROMOSOME_V	15090740	15091102	+	WBGene00044658		cds
C01G10.18	0	0	0	0	0	0	0	0	0	0	CHROMOSOME_V	15088410	15088682	-	WBGene00077583		cds
C01G10.2	0	0	0	0	0	0	0	0	0	0	CHROMOSOME_V	15097657	15099537	+	WBGene00005970	srx-79	cds
C01G10.3	0	0	0	0	0	0	0	0	0	0	CHROMOSOME_V	15095032	15097435	+	WBGene00005969	srx-78	cds
C01G10.4	0	0	0	0	0	0	0	0	0	0	CHROMOSOME_V	15089738	15090004	+	WBGene00007231		cds
C01G10.5	0	0	0	0	0	0	0	0	0	0	CHROMOSOME_V	15089085	15089482	-	WBGene00007232		cds
C01G10.6	0	0	0	0	0	0	0	0	0	0	CHROMOSOME_V	15087639	15088319	+	WBGene00007233		cds
C01G10.7	2.60392	4.50035	6.60553	8.42902	9.42157	6.93267	8.57281	4.01262	7.12929	7.78088	CHROMOSOME_V	15085730	15087047	+	WBGene00007234		cds
C01G10.8	30.5128	38.1327	34.8748	37.2871	31.3726	20.9079	16.179	15.922	22.403	20.8812	CHROMOSOME_V	15084041	15085368	-	WBGene00007235		cds
C01G10.9	0	0.21732	0.162666	0.313904	0.281622	0.421694	0.475186	0	0	0	CHROMOSOME_V	15082747	15084074	+	WBGene00007236		cds
C01G12.1	0	0	0	0	0	2.74639	1.90399	0.733557	0.94225	0.973458	CHROMOSOME_II	14573540	14576487	+	WBGene00007242	madf-5	cds
C01G12.10	0	0	0	0	0	0	0	0	0	0	CHROMOSOME_II	14580256	14580968	-	WBGene00007250	nspb-8	cds
C01G12.11	0	0	0	0	0	0	0	0	0	0	CHROMOSOME_II	14580818	14581200	+	WBGene00007251	nspb-9	cds
C01G12.13	0	0	0	0	0	0	0	0	0	0	CHROMOSOME_II	14576882	14578000	+	WBGene00044333		cds
C01G12.16	0	0	0	0	0	0	0	0	0	0	CHROMOSOME_III	4161211	4161801	+	WBGene00219299		cds
C01G12.2	0	0	0	0	0	0	0	0	0	0	CHROMOSOME_II	14578210	14578522	+	WBGene00007243	nspb-7	cds
C01G12.3	0	0	0	0	0	0.246884	0	3.19286	0.963057	0.67315	CHROMOSOME_II	14581390	14582285	-	WBGene00007244		cds
C01G12.5	0	0	0	0	0	0	0	0	0	0	CHROMOSOME_II	14586452	14587432	-	WBGene00007245		cds
C01G12.6	0	0	0	0	0	0	0	0	0	0	CHROMOSOME_II	14587882	14588186	-	WBGene00007246	nspb-10	cds
C01G12.7	0	0	0	0	0	0	0	0	0	0	CHROMOSOME_II	14588546	14591818	-	WBGene00007247		cds
C01G12.8	0	0	0	0	0	0	0	0	0	0	CHROMOSOME_II	14593449	14597565	+	WBGene00007248	catp-4	cds
C01G12.9	0	0	0	0	0	0	0	0	0	0	CHROMOSOME_II	14578944	14580023	+	WBGene00007249		cds
C01G5.2	36.7472	36.3428	33.0094	21.3826	11.7775	1.40565	1.90723	0.819766	0.471125	0.448767	CHROMOSOME_IV	6526713	6529791	-	WBGene00004179	prg-2	cds
C01G5.3	0	0	0	0	0	0	0	0	0	0.224383	CHROMOSOME_IV	6536168	6538989	+	WBGene00015305		cds
C01G5.4	0	0	0	0	0	0	0	0	0	0	CHROMOSOME_IV	6531739	6535666	+	WBGene00015306		cds
C01G5.5	0	5.85961	7.96768	4.96054	8.32402	6.51098	4.76159	5.30732	7.1501	8.3815	CHROMOSOME_IV	6524597	6526485	+	WBGene00015307		cds
C01G5.6	5.77213	7.76015	11.6254	12.5679	13.9576	12.4219	8.57281	5.30732	7.60042	11.2985	CHROMOSOME_IV	6522863	6524557	+	WBGene00015308		cds
C01G5.7	0	0	0	0	0	0	0	0	0	0	CHROMOSOME_IV	6518163	6519023	+	WBGene00015309		cds
C01G5.8	3.73251	2.16918	5.54894	5.4527	6.25971	5.20806	4.75186	5.65215	4.30255	4.3426	CHROMOSOME_IV	6548840	6552556	+	WBGene00015310	fan-1	cds
C01G5.9	0	0	0.162666	0	0	0.140565	0	0	0	0	CHROMOSOME_IV	6519964	6522292	+	WBGene00015311		cds
C01G6.1	2.37276	0.813946	3.63947	0.742137	0.636156	1.02178	0.475186	0.819766	0	0.67315	CHROMOSOME_II	9258853	9261934	-	WBGene00000170	aqp-2	cds
C01G6.2	0	0	0	0	0	0	0	0	0	0	CHROMOSOME_II	9267276	9268243	+	WBGene00007224		cds
C01G6.3	2.48834	0.975931	1.09763	2.60425	25.3266	41.4212	33.7998	48.4979	38.4836	33.5192	CHROMOSOME_II	9269832	9271211	+	WBGene00007225		cds
C01G6.4	5.30982	5.42497	10.6494	8.16552	8.40195	11.3009	18.0895	22.5663	17.5981	11.8991	CHROMOSOME_II	9271202	9272984	-	WBGene00007226		cds
C01G6.5	4.97668	11.7745	14.818	10.8124	15.7592	19.9383	19.5183	22.1353	18.1108	23.0593	CHROMOSOME_II	9274994	9280038	-	WBGene00007227		cds
C01G6.6	11.7618	15.5163	17.6624	17.9354	20.2652	16.6496	14.2783	19.0286	20.9584	15.496	CHROMOSOME_II	9285872	9289076	+	WBGene00006510	mtrr-1	cds
C01G6.7	0	0	0	0	0	0	0	0	0	0	CHROMOSOME_II	9291957	9293981	+	WBGene00007228	acs-7	cds
C01G6.8	0	0	0	0.470856	3.91878	14.2978	13.7966	9.14752	9.98725	13.4006	CHROMOSOME_II	9295877	9310242	-	WBGene00000289	cam-1	cds
C01G6.9	0	0	0.162666	0	0	0	0	0	0.481529	0	CHROMOSOME_II	9293978	9295693	-	WBGene00007229		cds
C01G8.1	5.54098	4.88368	14.7739	34.2644	63.092	69.2076	82.3369	54.4964	43.8012	44.9865	CHROMOSOME_I	5272849	5274325	-	WBGene00015312		cds
C01G8.2	0	1.41057	0.772294	1.71293	2.58358	2.4995	1.4288	1.55332	2.87877	1.94692	CHROMOSOME_I	5274699	5278711	-	WBGene00000540		cds
C01G8.3	2.82148	7.54283	10.6282	11.4267	10.8497	11.0126	7.13428	8.8889	10.5416	13.1003	CHROMOSOME_I	5278807	5281519	-	WBGene00000965	dhs-1	cds
C01G8.4	1.35975	3.69042	4.04391	3.69715	2.69546	2.42743	7.14401	1.55332	2.37643	2.24383	CHROMOSOME_I	5282086	5283946	-	WBGene00001022	dnj-4	cds
C01G8.5	15.3788	27.4609	23.7404	27.9319	22.694	21.3674	20.4784	12.5128	11.9342	14.5158	CHROMOSOME_I	5284060	5291608	-	WBGene00001333	erm-1	cds
C01G8.6	27.9496	24.1497	14.634	11.9053	9.03309	5.59551	0.950372	2.37309	2.35562	3.36575	CHROMOSOME_I	5298758	5300334	-	WBGene00015313	hpo-32	cds
C01G8.9	0	0.379305	0.487998	0.606496	0.495345	0.809143	0	0.733557	0.471125	0.224383	CHROMOSOME_I	5301521	5310729	-	WBGene00002717	let-526	cds
C01H6.1	0	0	0	0	0	0	0	0	0	0	CHROMOSOME_I	7202181	7203506	-	WBGene00000637	col-61	cds
C01H6.2	0	0	0	0	0	0.140565	0	0	0	0.224383	CHROMOSOME_I	7204543	7207715	-	WBGene00007252		cds
C01H6.3	0	0	0	0	0	0.140565	0	0	0	0	CHROMOSOME_I	7208026	7209864	-	WBGene00007253		cds
C01H6.4	0	0	0	0	0	0	0	0	0	0.224383	CHROMOSOME_I	7210541	7212697	+	WBGene00007254		cds
C01H6.5	0.679874	0.975931	0.386147	1.14906	0.92279	0.528014	1.4288	0	0.952653	1.42222	CHROMOSOME_I	7214743	7221346	+	WBGene00003622	nhr-23	cds
C01H6.6	0	0.21732	0.223481	0	0	0	0	0	0	0	CHROMOSOME_I	7222049	7224133	+	WBGene00007255		cds
C01H6.7	7.5806	14.0464	13.2323	13.4109	21.4167	21.4088	18.0733	11.0457	24.7482	18.4889	CHROMOSOME_I	7224654	7227763	+	WBGene00007256	tag-298	cds
C01H6.8	0	0	0.162666	0	0	0	0	0	0	0	CHROMOSOME_I	7227862	7229432	+	WBGene00007257		cds
C01H6.9	5.65656	2.65916	3.51636	4.66017	4.04569	4.36826	3.80798	0.733557	2.88917	2.62007	CHROMOSOME_I	7229416	7233118	-	WBGene00007258		cds
C02A12.1	0	0	0	0	0	0	0	0	0	0	CHROMOSOME_V	3467450	3468498	-	WBGene00001781	gst-33	cds
C02A12.10	0	0	0	0	0	0	0	0	0	0	CHROMOSOME_V	3483088	3484778	-	WBGene00044090	srbc-33	cds
C02A12.2	0	0	0	0	0	0	0	0	0	0	CHROMOSOME_V	3469442	3470586	-	WBGene00015315	srbc-29	cds
C02A12.3	0	0	0	0	0	0	0	0	0	0	CHROMOSOME_V	3478028	3480443	-	WBGene00015316	srbc-30	cds
C02A12.4	0	0	0	0	0	0	0	0	0	0.224383	CHROMOSOME_V	3481416	3482599	-	WBGene00003096	lys-7	cds
C02A12.5	0	0	0	0	0	0.246884	0	0	0	0	CHROMOSOME_V	3485546	3486954	-	WBGene00015317	srbc-32	cds
C02A12.6	0	0	0	0	0	0	0	0	0	0	CHROMOSOME_V	3489225	3490532	-	WBGene00015318	srbc-36	cds
C02A12.8	0	0	0	0	0	0	0	0	0	0	CHROMOSOME_V	3474274	3475118	-	WBGene00044088	oac-2	cds
C02A12.9	0	0	0	0	0	0	0	0	0	0	CHROMOSOME_V	3476402	3477593	-	WBGene00044089	srbc-31	cds
C02B10.1	27.2562	19.3254	18.313	22.3804	20.6008	15.7377	19.5183	14.1523	17.1686	15.1923	CHROMOSOME_IV	5086325	5088870	-	WBGene00015326	ivd-1	cds
C02B10.2	6.10527	9.06005	14.6142	12.6106	11.418	11.0198	8.56308	13.1601	19.0219	16.0173	CHROMOSOME_IV	5090282	5091101	-	WBGene00015327		cds
C02B10.3	0	0	0.223481	1.46296	0.675118	0.634333	2.37917	0	0	0.749075	CHROMOSOME_IV	5092815	5103273	-	WBGene00015328		cds
C02B10.4	56.1168	63.4244	61.8062	64.7387	71.2301	65.1926	72.3548	79.8245	80.2755	74.3909	CHROMOSOME_IV	5091576	5092800	+	WBGene00015329		cds
C02B10.5	4.97668	10.1939	15.9354	14.06	14.2971	15.0006	11.9024	11.7792	9.55774	6.51051	CHROMOSOME_IV	5083295	5086859	+	WBGene00015330		cds
C02B10.6	0	0	0	0	0	0	0	0	0	0	CHROMOSOME_IV	5070923	5072221	+	WBGene00015331		cds
C02B4.1	0	0	0	0	0	0	0	0	0	0	CHROMOSOME_X	12678760	12689207	+	WBGene00000082	adt-1	cds
C02B4.2	0	0	0	0	0	2.32469	0.475186	1.63953	2.38684	2.62007	CHROMOSOME_X	12663724	12667782	-	WBGene00003616	nhr-17	cds
C02B4.3	0	0	0	0	0	0	0	0	0	0	CHROMOSOME_X	12658405	12660991	-	WBGene00007259		cds
C02B4.4	0	0	0	0	0	0	0	0	0	0	CHROMOSOME_X	12662403	12663553	-	WBGene00045386		cds
C02B8.1	0.564296	0.21732	0	0	0.670105	0.246884	0	0	0	0	CHROMOSOME_X	8147661	8148539	+	WBGene00015320		cds
C02B8.2	0	0	0	0	0	0	0	0	0	0	CHROMOSOME_X	8143757	8144978	+	WBGene00015321	fbxc-38	cds
C02B8.3	0	0	0	0	0	0	0	0	0	0	CHROMOSOME_X	8139473	8140184	+	WBGene00015322		cds
C02B8.4	0	0	0	0	0	0	0	0	0	0	CHROMOSOME_X	8116587	8120057	+	WBGene00001953	hlh-8	cds
C02B8.5	0	0	0	0	0	0	0	0	0	0	CHROMOSOME_X	8120361	8125707	-	WBGene00015323	frpr-1	cds
C02B8.6	0	0	0	0	0	0	0.953616	0	0	0	CHROMOSOME_X	8133862	8136279	-	WBGene00015324		cds
C02B8.7	0	0	0	0	0	0	0	0	0	0	CHROMOSOME_X	8137672	8137830	-	WBGene00015325		cds
C02C2.1	0	0	0	0	0	0.140565	0	0	0	0	CHROMOSOME_III	7873715	7877041	+	WBGene00015332	tyr-1	cds
C02C2.3	0	0	0	0	0	0	0	0	0	0	CHROMOSOME_III	7866443	7868661	+	WBGene00000845	cup-4	cds
C02C2.4	0	0	0	0	0	0	0	0	0	0	CHROMOSOME_III	7862513	7865222	-	WBGene00015333		cds
C02C2.5	0	0	0	0	0	0	0	0	0	0	CHROMOSOME_III	7877147	7878774	-	WBGene00015334		cds
C02C6.1	0	0	0	0	1.9374	5.45495	1.90399	6.12709	8.09235	7.93612	CHROMOSOME_X	15568848	15573625	+	WBGene00001130	dyn-1	cds
C02C6.2	0	0	0	0	0	0	0	0	0	0	CHROMOSOME_X	15537594	15546255	+	WBGene00007260	olrn-1	cds
C02C6.3	0	0	0.650665	0.135641	0	1.26867	0.950372	1.55332	2.86836	1.87099	CHROMOSOME_X	15546646	15552165	-	WBGene00007261	lron-3	cds
C02D4.1	0	0	0	0	0	0	0	0	0	0	CHROMOSOME_X	15284138	15286158	+	WBGene00007262	jud-4	cds
C02D4.2	0	0	0	0	0	0	0	0	0	0	CHROMOSOME_X	15286510	15302894	-	WBGene00004777	ser-2	cds
C02D5.1	0	0	0	0	0	0	0	0	0	0	CHROMOSOME_III	8561105	8562892	+	WBGene00015335	acdh-6	cds
C02D5.2	0	0	0.162666	0	0	0	0	0	0.471125	0	CHROMOSOME_III	8557255	8559114	+	WBGene00015336		cds
C02D5.3	0	0	0	0	0	0	0	0	0	0	CHROMOSOME_III	8554692	8555741	+	WBGene00015337	gsto-2	cds
C02D5.4	0.679874	0	0	0.135641	3.52027	12.2885	9.03826	6.94685	12.3949	11.8266	CHROMOSOME_III	8552473	8553757	+	WBGene00043097		cds
C02E11.1	1.12859	1.13792	0.874145	0.585185	5.00631	34.8525	39.0561	35.8565	29.134	19.9837	CHROMOSOME_V	1042693	1048583	-	WBGene00015344	nra-4	cds
C02E7.1	0	0	0	0	0	0	0	0	0	0	CHROMOSOME_V	4934692	4939071	+	WBGene00015338	catp-2	cds
C02E7.10	0	0	0	0	0	0	0	0	0	0	CHROMOSOME_V	4930803	4933013	-	WBGene00015342		cds
C02E7.13	0	0	0	0	0	0	0	0	0	0	CHROMOSOME_V	4943102	4944305	-	WBGene00006244	str-211	cds
C02E7.2	0	0	0	0	0	0	0	0	0	0	CHROMOSOME_V	4926657	4928181	+	WBGene00005246	srh-21	cds
C02E7.3	0	0	0	0	0	0	0	0	0	0	CHROMOSOME_V	4924904	4926210	+	WBGene00005245	srh-20	cds
C02E7.4	0	0	0	0	0	0	0	0	0	0	CHROMOSOME_V	4923278	4924580	+	WBGene00005247	srh-22	cds
C02E7.5	0	0	0	0	0	0	0	0	0	0	CHROMOSOME_V	4921088	4922602	+	WBGene00005248	srh-23	cds
C02E7.6	0	0	0	0	0	0	0	0	0	0	CHROMOSOME_V	4919193	4919567	+	WBGene00015339		cds
C02E7.7	0	0	0	0	0	0	0	0	0	0	CHROMOSOME_V	4918140	4918571	-	WBGene00015340		cds
C02E7.8	0	0	0	0	0	0	0	0.819766	0	0	CHROMOSOME_V	4920328	4920776	-	WBGene00015341		cds
C02E7.9	0	0	0	0	0	0	0	0	0	0	CHROMOSOME_V	4928264	4929928	-	WBGene00006238	str-205	cds
C02F12.1	0	0	0	0	0	0	0	0	0	0	CHROMOSOME_X	3681155	3684219	+	WBGene00006643	tsp-17	cds
C02F12.10	0	0	0	0	0	0.246884	0	0	0	0	CHROMOSOME_X	3672264	3673905	-	WBGene00045215		cds
C02F12.3	0	0	0	0	0	0	0	0	0	0	CHROMOSOME_X	3668092	3668929	-	WBGene00015354	snet-1	cds
C02F12.4	0.679874	0	0	0	0.529294	3.34648	6.1839	4.65997	4.75286	4.19075	CHROMOSOME_X	3674030	3678546	-	WBGene00006431	tag-52	cds
C02F12.5	0	0	0	0	0	0	0	0	0	0	CHROMOSOME_X	3670360	3672045	-	WBGene00015355		cds
C02F12.7	0	0	0	0	0	0	0.475186	0	0	0.224383	CHROMOSOME_X	3684211	3689194	-	WBGene00015356	tag-278	cds
C02F12.8	0.679874	0	0.162666	0	1.80161	7.42644	5.70872	0.733557	8.09235	5.83736	CHROMOSOME_X	3690154	3693225	-	WBGene00015357		cds
C02F12.9	0	0	0	0	0	0	0	0	0	0	CHROMOSOME_X	3696890	3700794	+	WBGene00015358		cds
C02F4.1	4.29681	5.31832	14.2677	11.7619	15.7253	13.8383	15.2287	15.7057	11.4214	13.6216	CHROMOSOME_IV	10484090	10492932	+	WBGene00000419	ced-5	cds
C02F4.2	0	0	0	0	0.140811	1.62187	0.953616	0.819766	0	0.448767	CHROMOSOME_IV	10493176	10501579	-	WBGene00006527	tax-6	cds
C02F4.4	0	0	0	0	0	0	0	0	0	0	CHROMOSOME_IV	10513870	10515263	-	WBGene00007264		cds
C02F4.5	0	0	0	0	0	0	0	0	0	0	CHROMOSOME_IV	10523415	10524125	-	WBGene00007265		cds
C02F5.1	4.07925	2.27985	1.99155	5.18142	6.16788	4.71788	6.19688	3.92641	5.70552	5.46452	CHROMOSOME_III	8250565	8253872	+	WBGene00002231	knl-1	cds
C02F5.10	1.24417	0.813946	0.223481	0	0	0.281129	0	0	0	0	CHROMOSOME_III	8248614	8249410	-	WBGene00015351		cds
C02F5.11	0	0	0.162666	0	0	0	0	0	0	0	CHROMOSOME_III	8236846	8237822	-	WBGene00006628	tsp-2	cds
C02F5.12	0.564296	0.21732	0.162666	0.606496	0.951727	6.37041	10.9585	3.19286	3.34989	6.21359	CHROMOSOME_III	8240807	8242932	-	WBGene00015352		cds
C02F5.13	6.90073	8.95341	7.05249	8.3864	10.3104	11.6884	11.4304	9.14752	9.00339	18.5581	CHROMOSOME_III	8247277	8248745	+	WBGene00015353		cds
C02F5.14	0	0	0	0	0	0	0	0	0	0	CHROMOSOME_III	8234452	8235458	-	WBGene00044445		cds
C02F5.2	0	0	0	0	0	0	0	0	0	0	CHROMOSOME_III	8249566	8250122	+	WBGene00015345		cds
C02F5.3	11.5307	8.95743	10.3043	15.5345	14.409	9.86104	12.3808	5.65215	7.64203	7.33212	CHROMOSOME_III	8245818	8247188	+	WBGene00015346		cds
C02F5.4	5.30982	8.3608	8.57879	9.34942	10.4562	8.72577	8.09763	7.03306	4.75286	5.46112	CHROMOSOME_III	8244372	8245723	+	WBGene00015347	cids-1	cds
C02F5.5	0	0	0	0	0	0	0	0	0	0	CHROMOSOME_III	8236075	8236835	+	WBGene00015348		cds
C02F5.6	1.12859	3.03846	2.0934	2.2051	2.72941	2.99327	0.475186	0.733557	2.85796	2.31976	CHROMOSOME_III	8232578	8234463	+	WBGene00015349		cds
C02F5.7	0.564296	1.95588	3.73984	2.16248	1.91348	1.09027	2.38242	0	2.84756	0.224383	CHROMOSOME_III	8229654	8232490	+	WBGene00015350		cds
C02F5.8	0	0	0	0	0	0	0	0	0	0	CHROMOSOME_III	8237924	8239352	-	WBGene00006627	tsp-1	cds
C02F5.9	41.4927	49.2634	50.9165	62.3882	53.2808	50.5253	55.6616	63.1674	83.3416	66.6202	CHROMOSOME_III	8243048	8244023	-	WBGene00003952	pbs-6	cds
C02G6.1	0	0	0	0	0	0	0	0	0	0	CHROMOSOME_V	5876353	5879925	+	WBGene00015359		cds
C02G6.2	0	0	0	0	0	0	0	0	0	0	CHROMOSOME_V	5872067	5874897	+	WBGene00015360		cds
C02G6.3	0	0	0	0	0	0	0	0	0	0	CHROMOSOME_V	5881094	5882433	+	WBGene00044803		cds
C02H6.1	0	0	0	0	0	0	0	0	0	0	CHROMOSOME_V	7388371	7389852	-	WBGene00015361		cds
C02H6.2	0	0	0	0	0	0	0	0	0	0	CHROMOSOME_V	7390508	7392068	-	WBGene00015362	fbxa-105	cds
C02H7.1	0	0	0	0	0	0	0	0.819766	0	0	CHROMOSOME_X	763768	766732	+	WBGene00001127	dyf-11	cds
C02H7.2	0	0	0	0	0	0	0	0	0	0	CHROMOSOME_X	731159	735671	-	WBGene00015364	npr-19	cds
C02H7.3	0	0	0	0	0	0	0	0	0	0	CHROMOSOME_X	751210	759731	-	WBGene00000086	aex-3	cds
C03A3.1	0	0	0	0	0	0	0	0	0	0	CHROMOSOME_X	11257296	11260160	+	WBGene00007266		cds
C03A3.2	0.564296	0	0	1.32732	0.810916	8.13285	16.179	13.2464	13.3476	8.98212	CHROMOSOME_X	11262781	11266247	+	WBGene00007267		cds
C03A3.3	0	0	0	0	0	0	0	0	0	0	CHROMOSOME_X	11267326	11268966	-	WBGene00007268		cds
C03A7.10	0	0	0	0	0	0	0	0	0	0	CHROMOSOME_V	5170898	5172917	-	WBGene00015368	srt-65	cds
C03A7.11	0	0	0	0	0	0	0	0	0	0	CHROMOSOME_V	5175010	5177240	-	WBGene00015369	ugt-51	cds
C03A7.12	0	0	0	0	0.106861	0	0	0	0	0	CHROMOSOME_V	5178322	5181440	-	WBGene00015370		cds
C03A7.13	0	0	0	0	0	0	0	0	0	0	CHROMOSOME_V	5191114	5192515	-	WBGene00015371		cds
C03A7.14	0	0	0	0	0	0	0	0	0	0	CHROMOSOME_V	5192977	5194592	-	WBGene00000031	abu-8	cds
C03A7.2	0	0.21732	0	0	0.106861	0	0	0	0	0	CHROMOSOME_V	5181896	5183701	+	WBGene00015366		cds
C03A7.3	0	0	0	0	0	0	0	0	0	0	CHROMOSOME_V	5165710	5167225	+	WBGene00005887	srw-140	cds
C03A7.4	0	0	0	0	0	0	0	0	0	0	CHROMOSOME_V	5158608	5159882	+	WBGene00004099	abu-15	cds
C03A7.5	0	0	0	0	0	0	0	0	0	0	CHROMOSOME_V	5154042	5155501	-	WBGene00005929	srx-38	cds
C03A7.6	0	0	0	0	0	0	0	0	0	0	CHROMOSOME_V	5156638	5157745	-	WBGene00005930	srx-39	cds
C03A7.7	0	0	0	0	0	0	0	0	0	0	CHROMOSOME_V	5160656	5161877	-	WBGene00000029	abu-6	cds
C03A7.8	0	0	0	0	0	0	0	0	0	0	CHROMOSOME_V	5163380	5164743	-	WBGene00000030	abu-7	cds
C03A7.9	0	0	0	0	0	0	0	0	0	0	CHROMOSOME_V	5168259	5169670	-	WBGene00015367	srt-64	cds
C03B1.1	0	0	0	0	0	0	0	0	0	0	CHROMOSOME_X	6373612	6375555	+	WBGene00015372		cds
C03B1.10	0	0	0	0	0	0	0	0	0	0	CHROMOSOME_X	6357711	6357919	-	WBGene00015380		cds
C03B1.12	2.03962	1.03127	2.82614	2.39114	10.4011	61.7306	56.1628	67.7428	50.4178	50.3717	CHROMOSOME_X	6376422	6377651	-	WBGene00003053	lmp-1	cds
C03B1.13	0	0	0	0	0	0	0	0	0	0	CHROMOSOME_X	6335239	6337999	-	WBGene00015381		cds
C03B1.14	0	0	0	0	0	0	0	0	0	0	CHROMOSOME_X	6359372	6360724	-	WBGene00015382		cds
C03B1.2	0	0	0	0	0	0	0	0	0	0	CHROMOSOME_X	6367578	6373121	+	WBGene00015373		cds
C03B1.3	0	0	0	0	0	0	0	0	0	0	CHROMOSOME_X	6365977	6366795	+	WBGene00015374		cds
C03B1.4	0	0	0	0	0	0	0	0	0	0	CHROMOSOME_X	6364460	6365681	+	WBGene00015375		cds
C03B1.5	0	0	0	0	0	0	0	0	0	0	CHROMOSOME_X	6355549	6357745	+	WBGene00015376		cds
C03B1.6	0	0	0	0	0	0	0	0	0	0	CHROMOSOME_X	6350151	6351840	+	WBGene00015377		cds
C03B1.7	0	0	0	0	0.140811	1.44348	0.475186	0	0	0	CHROMOSOME_X	6341799	6345993	+	WBGene00015378		cds
C03B1.9	0	0	0	0	0	0	0	0	0	0	CHROMOSOME_X	6346323	6347077	-	WBGene00015379		cds
C03B8.2	1.12859	1.57256	1.26029	0.992107	1.02965	0.668579	0	0	0	0	CHROMOSOME_III	7716101	7716381	+	WBGene00015385		cds
C03B8.3	0	0	0	0	0	0	0	0	0	0	CHROMOSOME_III	7712266	7717247	+	WBGene00015386		cds
C03B8.4	11.5307	8.19077	12.8051	13.2384	16.584	13.5157	8.09438	11.693	11.4526	8.00866	CHROMOSOME_III	7700069	7709407	-	WBGene00003002	lin-13	cds
C03C10.1	12.8904	19.582	14.2889	22.5858	20.0715	13.022	13.3344	14.7997	20.4977	16.8457	CHROMOSOME_III	4084010	4086618	-	WBGene00002202	kin-19	cds
C03C10.2	0	0	0	0	0	0	0	0	0	0	CHROMOSOME_III	4091052	4093254	+	WBGene00007269		cds
C03C10.3	22.0483	27.6148	25.1618	33.869	75.4227	108.064	144.28	107.48	123.723	102.373	CHROMOSOME_III	4093280	4094899	-	WBGene00004392	rnr-2	cds
C03C10.4	10.6332	10.2533	13.7797	17.1002	17.3043	16.0837	23.3263	14.9721	13.7979	15.4892	CHROMOSOME_III	4096875	4098107	-	WBGene00007270		cds
C03C10.5	0	0	0	0	0	0	0	0	0	0	CHROMOSOME_III	4090266	4090532	-	WBGene00007271		cds
C03C10.7	0	0.21732	0	0	0	0	0	0	0.471125	0	CHROMOSOME_III	4096019	4097114	+	WBGene00007273		cds
C03C10.9	0	0	0	0	0	0	0	0	0	0	CHROMOSOME_III	4089778	4089912	-	WBGene00185075		cds
C03C11.1	0	0	0	0	0	0	0	0	0	0	CHROMOSOME_I	10014721	10015487	+	WBGene00007274		cds
C03C11.2	0	0	0	0.156952	0	0.421694	1.4288	0.819766	0	0	CHROMOSOME_I	10016768	10018105	+	WBGene00001483	fog-3	cds
C03D6.1	0	0	0.162666	0	0.106861	0.140565	0	0	0	0	CHROMOSOME_I	9668621	9670706	-	WBGene00007275		cds
C03D6.3	3.73251	7.38085	6.11902	5.07486	6.04598	6.33617	3.80798	3.8402	6.66857	3.66606	CHROMOSOME_I	9665246	9668655	+	WBGene00000466	cel-1	cds
C03D6.4	21.3685	25.9909	31.401	32.6851	37.5443	34.5749	37.1294	36.6324	40.5762	38.4001	CHROMOSOME_I	9660166	9665135	-	WBGene00003800	npp-14	cds
C03D6.5	8.24688	16.2196	10.0809	10.6845	15.5165	9.36727	4.75835	6.94685	11.8926	8.98212	CHROMOSOME_I	9658265	9660064	+	WBGene00007277	asfl-1	cds
C03D6.6	0.564296	1.24859	3.0694	7.52216	19.9607	17.7705	7.61595	7.29169	11.9342	10.7046	CHROMOSOME_I	9657049	9657841	-	WBGene00007278	lab-1	cds
C03D6.8	37.5563	32.7158	27.4406	23.3783	14.2682	12.4219	7.62244	6.2995	8.11316	6.43458	CHROMOSOME_I	9669404	9670132	+	WBGene00004437		cds
C03E10.1	0	0	0	0	0	0	0	0	0	0	CHROMOSOME_V	11291170	11292551	+	WBGene00007279		cds
C03E10.3	0	0	0	0	0	0	0	0	0	0.749075	CHROMOSOME_V	11286800	11288208	+	WBGene00007281		cds
C03E10.4	12.2241	15.8362	17.8844	19.5766	23.9085	23.2704	24.7356	24.9394	26.6223	35.3245	CHROMOSOME_V	11282552	11286024	+	WBGene00001645	gly-20	cds
C03E10.5	0	0	0	0	0	0	0	0	0.963057	0	CHROMOSOME_V	11273130	11278141	+	WBGene00007282	clec-223	cds
C03E10.6	0	0	0	0	0	0.246884	0	0	0	1.49815	CHROMOSOME_V	11271333	11272451	+	WBGene00007283	clec-222	cds
C03F11.1	0	0	0	0	0	0	0	0	0	0	CHROMOSOME_X	5390698	5394108	+	WBGene00015387	kcnl-3	cds
C03F11.2	0	0	0	0	0	0	0	0	0	0	CHROMOSOME_X	5394531	5396896	-	WBGene00015388		cds
C03F11.3	0	0	0	0	0.106861	0	0	0	0	0	CHROMOSOME_X	5397644	5400552	-	WBGene00015389	scav-1	cds
C03F11.4	0.564296	0	0	0	0.106861	0.387449	0.953616	1.46711	0.963057	0	CHROMOSOME_X	5401453	5406411	-	WBGene00015390		cds
C03G5.1	0.564296	0	0.162666	0.449544	0.985677	6.41182	13.3247	9.14752	6.69978	8.16051	CHROMOSOME_X	8542814	8545974	-	WBGene00015391	sdha-1	cds
C03G5.10	0	0	0	0	0	0	0	0	0	0	CHROMOSOME_X	8537055	8537460	+	WBGene00044338	nspc-3	cds
C03G5.11	0	0	0	0	0	0	0	0	0	0	CHROMOSOME_X	8537896	8538306	-	WBGene00044339	nspc-4	cds
C03G5.12	0	0	0	0	0	0	0	0	0	0	CHROMOSOME_X	8538687	8539037	+	WBGene00044340	nspc-5	cds
C03G5.13	0	0	0	0	0	0	0	0	0	0	CHROMOSOME_X	8541093	8541443	-	WBGene00044357	nspc-6	cds
C03G5.2	0	0	0.162666	0	0	0	0	0	0	0	CHROMOSOME_X	8541812	8542231	+	WBGene00015392	nspc-7	cds
C03G5.7	0	0	0	0	0	0	0	0	0	0	CHROMOSOME_X	8528197	8531023	+	WBGene00001448	flp-5	cds
C03G5.8	0	0	0	0	0.140811	0	0	0	0	0	CHROMOSOME_X	8534617	8535053	-	WBGene00023477	nspc-1	cds
C03G5.9	0	0	0	0	0	0	0	0	0	0	CHROMOSOME_X	8535416	8535766	+	WBGene00044337	nspc-2	cds
C03G6.10	0	0	0	0	0	0	0	0	0	0	CHROMOSOME_V	7342170	7343818	+	WBGene00015396	nhr-148	cds
C03G6.11	0	0	0	0	0	0	0	0	0	0	CHROMOSOME_V	7350863	7352218	-	WBGene00005439	srh-231	cds
C03G6.12	0	0	0	0	0	0	0	0	0	0	CHROMOSOME_V	7348193	7350049	-	WBGene00015397	nhr-149	cds
C03G6.13	0	0	0	0	0	0	0	0	0	0	CHROMOSOME_V	7354458	7356766	-	WBGene00015398	tag-293	cds
C03G6.14	0	0	0	0	0	0	0	0	0	0	CHROMOSOME_V	7359979	7361755	-	WBGene00015399	cyp-35A1	cds
C03G6.15	0	0	0	0	0	0	0	0	0	0	CHROMOSOME_V	7362298	7364186	-	WBGene00015400	cyp-35A2	cds
C03G6.16	0	0	0	0	0	0	0	0	0	0	CHROMOSOME_V	7377879	7379466	-	WBGene00015401	srsx-24	cds
C03G6.17	0	0	0	0	0	0	0	0	0	0	CHROMOSOME_V	7379736	7381066	-	WBGene00015402		cds
C03G6.18	0	0	0	0	0	0	0	0	0	0	CHROMOSOME_V	7382003	7383291	-	WBGene00005646	srp-5	cds
C03G6.19	0	0	0	0.292593	0	0	0	0.733557	0	0.224383	CHROMOSOME_V	7384214	7386288	-	WBGene00005647	srp-6	cds
C03G6.2	0	0	0	0	0	0	0	0	0	0	CHROMOSOME_V	7374372	7375576	+	WBGene00005947	srx-56	cds
C03G6.3	0	0	0	0	0	0	0	0	0	0	CHROMOSOME_V	7370759	7372113	+	WBGene00005602	srj-14	cds
C03G6.5	0	0	0	0	0	0	0	0	0	0	CHROMOSOME_V	7365225	7366206	+	WBGene00015393		cds
C03G6.6	0	0	0	0	0	0	0	0	0	0	CHROMOSOME_V	7357420	7358864	+	WBGene00015394		cds
C03G6.7	0	0	0	0	0	0	0	0	0	0	CHROMOSOME_V	7353022	7354236	+	WBGene00005480	srh-275	cds
C03G6.8	0	0	0	0	0	0	0	0	0	0	CHROMOSOME_V	7346283	7348117	+	WBGene00015395	nhr-147	cds
C03G6.9	0	0	0	0	0	0	0	0	0	0	CHROMOSOME_V	7344043	7345216	+	WBGene00005450	srh-244	cds
C03H12.1	0	0	0.162666	0	0	2.89054	0.475186	2.37309	1.42378	3.74198	CHROMOSOME_X	15689390	15696355	+	WBGene00007284		cds
C03H5.1	0	0	0	0	0	0	0	0	0	0	CHROMOSOME_II	402660	404235	+	WBGene00015403	clec-10	cds
C03H5.2	7.5806	10.1426	7.23494	5.53795	8.1103	6.33617	6.18715	8.67259	8.58428	4.41513	CHROMOSOME_II	388833	392737	+	WBGene00015404	nstp-4	cds
C03H5.3	10.8644	7.2742	6.85027	5.6949	4.7837	4.22411	3.32955	4.65997	3.82102	2.6926	CHROMOSOME_II	386194	387920	+	WBGene00015405		cds
C03H5.4	0	0	0	0	0	0	0	0	0	0	CHROMOSOME_II	375250	375873	+	WBGene00015406		cds
C03H5.5	0	0	0	0.135641	0.422433	0.387449	1.90723	2.20067	1.42378	0.749075	CHROMOSOME_II	382273	385354	-	WBGene00015407		cds
C03H5.6	0	0	0	0	0	0	0	0	0	0	CHROMOSOME_II	396691	399423	-	WBGene00015408		cds
C03H5.7	0	0	0	0	0	0	0	0	0	0	CHROMOSOME_II	380573	382257	+	WBGene00015409		cds
C03H5.9	0	0	0	0	0	0	0	0	0	0	CHROMOSOME_II	378651	380361	+	WBGene00206366		cds
C04A11.1	0	0.379305	0	0	0	0	0	0	0	0	CHROMOSOME_X	13660449	13662893	+	WBGene00007285		cds
C04A11.2	0	0	0.162666	0	0	0.562259	1.42556	0.733557	2.35562	0.67315	CHROMOSOME_X	13665887	13668742	-	WBGene00007286		cds
C04A11.3	0	0	0	0	0.140811	0.246884	0	0	0	0.749075	CHROMOSOME_X	13677122	13682008	+	WBGene00007287	gck-4	cds
C04A11.4	0.679874	0	0.162666	0.135641	1.55393	9.57991	5.23353	10.6146	9.08662	5.61297	CHROMOSOME_X	13687903	13695721	+	WBGene00000074	adm-2	cds
C04A11.5	0	0	0	0	0	0	0	0	0	0	CHROMOSOME_X	13664517	13665282	+	WBGene00007288		cds
C04A2.1	0	0	0.487998	0.156952	0.106861	0.774898	0.953616	0	0.471125	0	CHROMOSOME_II	6848017	6851484	+	WBGene00015410	tbc-6	cds
C04A2.15	0	0	0	0	0	0	0	0	0	0	CHROMOSOME_II	6852176	6853448	+	WBGene00206529		cds
C04A2.3	17.7515	18.2348	16.1786	21.0667	37.3885	38.1504	46.1871	40.645	37.6246	47.1612	CHROMOSOME_II	6835038	6847865	+	WBGene00001194	egl-27	cds
C04A2.7	6.55399	23.7111	33.0064	35.2352	43.1879	43.5476	52.3386	62.5217	47.6431	57.1859	CHROMOSOME_II	6853426	6858255	-	WBGene00001023	dnj-5	cds
C04B4.1	0	0	0	0	0	0	0	0	0	0	CHROMOSOME_X	12280639	12282491	+	WBGene00007289		cds
C04B4.2	0.564296	0	0.325332	0.585185	11.3139	31.3961	19.5183	25.4566	28.5276	38.9973	CHROMOSOME_X	12283233	12285246	+	WBGene00007290		cds
C04B4.3	0	0	0	0	0	0	0	0	0	0	CHROMOSOME_X	12285756	12287185	+	WBGene00007291	lips-2	cds
C04B4.4	0	0	0	0	0	0	0	0	0	0	CHROMOSOME_X	12289911	12293199	+	WBGene00007292		cds
C04B4.5	0	0	0	0	0	0	0	0	0	0	CHROMOSOME_X	12287591	12288286	-	WBGene00007293		cds
C04B4.6	0	0	0	0	0	0	0	0	0	0	CHROMOSOME_X	12274974	12275609	-	WBGene00007294		cds
C04C11.1	0	0	0	0	0	0	0	0	0	0	CHROMOSOME_X	14020717	14022340	+	WBGene00007295		cds
C04C11.2	0.679874	0.379305	0.162666	0	0.140811	1.05603	1.4288	5.56595	0.952653	5.46452	CHROMOSOME_X	14033725	14037364	+	WBGene00007296	arrd-25	cds
C04C3.1	0	0	0	0	0	0	0	0	0	0	CHROMOSOME_IV	3428897	3430330	+	WBGene00015411	srz-60	cds
C04C3.2	0	0	0	0	0.140811	0.246884	0	0	0	0	CHROMOSOME_IV	3415680	3419231	+	WBGene00015412	lgc-9	cds
C04C3.3	29.0782	23.5531	22.8069	25.5117	22.0339	14.5375	16.6445	20.5819	29.5635	22.2309	CHROMOSOME_IV	3399667	3403904	+	WBGene00015413	pdhb-1	cds
C04C3.4	0.564296	0.975931	0.874145	0.428233	0.320584	0.387449	0	0	0	0	CHROMOSOME_IV	3394363	3394642	+	WBGene00015414		cds
C04C3.5	1.12859	0.596626	0.386147	0	0.140811	0.140565	0	0	0	0	CHROMOSOME_IV	3396578	3399120	-	WBGene00001119	dyf-3	cds
C04C3.6	0	0	0	0	0	0	0	0	0	0	CHROMOSOME_IV	3419810	3422604	-	WBGene00015416		cds
C04C3.7	0	0	0	0	0	0	0	0	0	0	CHROMOSOME_IV	3432772	3433484	-	WBGene00015417		cds
C04C3.9	0	0	0	0	0	0	0	0	0	0	CHROMOSOME_IV	3428085	3428531	-	WBGene00195067		cds
C04D8.1	4.41239	6.45623	13.4345	12.4885	13.4673	17.8262	10.9455	17.7339	18.142	11.8266	CHROMOSOME_III	8493801	8518803	+	WBGene00015418	pac-1	cds
C04E12.10	0	0	0	0	0	0	0	0	0	0	CHROMOSOME_V	3377533	3382847	-	WBGene00015439		cds
C04E12.11	0	0	0	0	0	0	0	0	0	0	CHROMOSOME_V	3386488	3388153	-	WBGene00015440	arrd-20	cds
C04E12.12	0	0	0	0	0	0	0	0	0	0.224383	CHROMOSOME_V	3389327	3390949	-	WBGene00015441	arrd-21	cds
C04E12.2	0	0	0	0	0	0	0	0	0	0	CHROMOSOME_V	3369078	3369874	+	WBGene00015433		cds
C04E12.4	0	0	0	0	0	0	0	0	0	0	CHROMOSOME_V	3362781	3368318	+	WBGene00015434		cds
C04E12.5	0	0	0	0	0	0	0	0	0	0	CHROMOSOME_V	3358596	3361090	+	WBGene00015435		cds
C04E12.6	0	0	0	0	0	0	0	0	0	0	CHROMOSOME_V	3354666	3355510	-	WBGene00015436		cds
C04E12.7	0.564296	0	0	0	0	0	0	0	0.481529	0	CHROMOSOME_V	3355977	3357190	-	WBGene00015437	scrm-3	cds
C04E12.8	0	0	0	0	0	0	0	0	0	0	CHROMOSOME_V	3370939	3372770	-	WBGene00006012	srx-121	cds
C04E12.9	0	0	0	0	0	0	0	0	0	0	CHROMOSOME_V	3374359	3377073	-	WBGene00015438	srbc-2	cds
C04E6.10	0	0	0	0	0	0	0	0	0	0	CHROMOSOME_V	5904900	5906335	-	WBGene00005093	srd-15	cds
C04E6.11	10.2865	14.5957	6.64657	10.6341	10.3444	10.5639	8.08789	13.0739	13.8291	8.75773	CHROMOSOME_V	5914078	5917831	-	WBGene00015425		cds
C04E6.13	0	0	0	0	0	0	0	0	0	0	CHROMOSOME_V	5912740	5913740	+	WBGene00015427		cds
C04E6.2	0	0	0	0	0	0	0	0	0	0	CHROMOSOME_V	5922528	5924280	+	WBGene00015419	srsx-18	cds
C04E6.3	0	0	0	0	0	0	0	0	0	0	CHROMOSOME_V	5920104	5920378	+	WBGene00015420		cds
C04E6.4	0	0	0	0	0	0	0	0	0	0	CHROMOSOME_V	5907391	5909603	+	WBGene00015421		cds
C04E6.5	0	0	0	0	0	0	0	0	0	0	CHROMOSOME_V	5902116	5904829	+	WBGene00015422		cds
C04E6.6	0	0	0	0	0	0	0	0	0	0	CHROMOSOME_V	5895371	5898585	+	WBGene00001698	grd-9	cds
C04E6.7	0	0	0	0.156952	0	0	0	1.46711	2.40764	0.749075	CHROMOSOME_V	5893300	5895192	+	WBGene00015423		cds
C04E6.8	0	0	0	0	0	0	0	0	0	0	CHROMOSOME_V	5882648	5883820	-	WBGene00015424		cds
C04E6.9	0	0	0	0	0	0	0	0	0	0	CHROMOSOME_V	5898511	5900023	-	WBGene00005094	srd-16	cds
C04E7.1	0	0	0	0	0	0	0	0	0	0	CHROMOSOME_X	358092	360198	+	WBGene00015428		cds
C04E7.2	0	0	0	0	0.140811	2.46526	0.953616	0	1.42378	4.19075	CHROMOSOME_X	353620	357934	+	WBGene00015429	sor-3	cds
C04E7.3	0	0.379305	0	0	0	0	0	0	0	0	CHROMOSOME_X	344127	346289	-	WBGene00015430		cds
C04E7.4	0	0	0	0	0	0.634333	0	0.733557	0.471125	0.224383	CHROMOSOME_X	334580	341232	-	WBGene00015431		cds
C04E7.5	0	0	0	0	0.140811	0	0	1.55332	0	0	CHROMOSOME_X	360779	362966	+	WBGene00045270		cds
C04F1.1	0	0	0	0	0	0	0	0	0	0	CHROMOSOME_I	5726381	5729310	-	WBGene00015442		cds
C04F1.3	0	0	0.325332	0	0	0	0	0	0	0	CHROMOSOME_I	5716679	5725359	+	WBGene00002989	lim-7	cds
C04F12.1	0	0.21732	0.874145	0	2.92809	6.82635	12.3775	6.12709	8.58428	12.1269	CHROMOSOME_I	9673658	9678544	-	WBGene00007297		cds
C04F12.10	7.23386	6.99752	11.6863	9.87068	13.0688	10.8072	10.9487	12.7714	6.63736	13.4698	CHROMOSOME_I	9711058	9712757	-	WBGene00001405	fce-1	cds
C04F12.12	0	0	0	0	0	0	0	0	0	0	CHROMOSOME_I	9694613	9695203	-	WBGene00077685		cds
C04F12.16	0	0	0	0	0	0	0	0	0	0	CHROMOSOME_I	9704943	9705284	+	WBGene00219286		cds
C04F12.3	0	0	0	0	0	0.140565	0	0	0.481529	0	CHROMOSOME_I	9685473	9688639	+	WBGene00002069	ikb-1	cds
C04F12.4	575.677	407.43	324.374	275.087	203.557	204.365	166.724	76.5423	51.1312	18.9343	CHROMOSOME_I	9689176	9690118	+	WBGene00004426	rpl-14	cds
C04F12.5	11.2995	13.3431	8.25197	7.74305	6.09998	5.63334	5.71196	10.6146	3.78981	2.6926	CHROMOSOME_I	9690089	9690548	-	WBGene00007299		cds
C04F12.6	0	0	0	0	0	0	0	0	0	0	CHROMOSOME_I	9692651	9693772	-	WBGene00007300		cds
C04F12.7	0	0	0	0	0	0	0	0	0	0	CHROMOSOME_I	9695699	9696753	-	WBGene00007301		cds
C04F12.8	0	0	0	0	0	0	0	0	0	0	CHROMOSOME_I	9697585	9699546	-	WBGene00007302		cds
C04F12.9	1.35975	0	0.162666	0.720826	1.5929	2.14988	2.37917	1.55332	2.85796	4.19414	CHROMOSOME_I	9710079	9710758	-	WBGene00007303		cds
C04F2.1	0	0	0	0	0	0	0	0	0	0	CHROMOSOME_V	7497721	7499036	+	WBGene00005300	srh-79	cds
C04F2.4	0	0	0	0	0	0	0	0	0	0	CHROMOSOME_V	7502631	7504352	-	WBGene00005437	srh-229	cds
C04F5.1	7.23386	9.17073	10.5278	10.6419	14.5787	16.8351	14.7632	15.6194	9.0346	16.7698	CHROMOSOME_V	5119955	5126901	+	WBGene00004795	sid-1	cds
C04F5.2	0	0	0	0	0	0	0	0	0	0	CHROMOSOME_V	5093700	5096262	-	WBGene00015444		cds
C04F5.3	0	0	0	0	0	0	0	0	0	0	CHROMOSOME_V	5097094	5098892	-	WBGene00006782	unc-46	cds
C04F5.4	0	0	0	0	0	0	0	0	0	0	CHROMOSOME_V	5100065	5102102	-	WBGene00015446	srab-1	cds
C04F5.5	0	0	0	0	0	0	0	0	0	0	CHROMOSOME_V	5103027	5105019	-	WBGene00015447	srab-2	cds
C04F5.6	0	0	0	0	0	0	0	0	0	0	CHROMOSOME_V	5105749	5107901	-	WBGene00015448	srab-3	cds
C04F5.7	0	0	0	0	0	0	0	0	0	0	CHROMOSOME_V	5108000	5110774	-	WBGene00015449	ugt-63	cds
C04F5.8	14.5833	10.7433	10.955	11.2968	8.75648	6.75786	4.28641	4.74618	6.64777	5.01575	CHROMOSOME_V	5111482	5113741	-	WBGene00015450		cds
C04F5.9	2.48834	0.813946	1.99155	3.87541	4.3902	4.53948	3.32955	4.01262	2.37643	3.36914	CHROMOSOME_V	5114730	5119194	-	WBGene00015451		cds
C04F6.1	7.47862	1.19325	2.60266	0.135641	0	0.387449	0	0	0	0.448767	CHROMOSOME_X	3403457	3408591	+	WBGene00006929	vit-5	cds
C04F6.3	0	0.21732	1.85014	0.292593	0.743017	0.774898	1.42556	3.8402	4.79448	2.99291	CHROMOSOME_X	3397594	3400007	-	WBGene00000503	cht-1	cds
C04F6.4	0	0	0.223481	0.135641	0.388483	4.75571	8.08789	5.56595	7.60042	8.16051	CHROMOSOME_X	3408650	3411669	-	WBGene00006810	unc-78	cds
C04F6.5	0.679874	0	0	0	0.140811	0.949708	0.950372	0.733557	1.90531	0.448767	CHROMOSOME_X	3412870	3414693	-	WBGene00000990	dhs-27	cds
C04F6.7	0	0	0	0	0	0	0	0	0	0	CHROMOSOME_X	3416875	3419200	-	WBGene00195081		cds
C04G2.1	0	0	0	0	0	0	0	0	0	0.224383	CHROMOSOME_IV	10088346	10089868	-	WBGene00007304	ttr-39	cds
C04G2.10	0	0.651961	0.487998	0	0.354534	0	0	0.819766	0	0	CHROMOSOME_IV	10115369	10118062	+	WBGene00007309		cds
C04G2.11	0	0	0	0	0	0	0	0	0	0	CHROMOSOME_IV	10119438	10122367	-	WBGene00007310		cds
C04G2.2	0	0	0	0	0	0	0	0	0	0	CHROMOSOME_IV	10090713	10092358	+	WBGene00007305		cds
C04G2.4	0	0	0	0	0	0	0	0	0	0	CHROMOSOME_IV	10095379	10095830	+	WBGene00003432	msp-36	cds
C04G2.5	0	0	0	0	0	0	0	0	0	0	CHROMOSOME_IV	10094179	10095204	-	WBGene00007306		cds
C04G2.6	15.7255	14.2204	12.7033	14.0948	14.326	13.5229	14.2718	16.1806	21.0104	12.1235	CHROMOSOME_IV	10097187	10106535	+	WBGene00001001	dis-3	cds
C04G2.7	0	0	0	0	0	0	0	0	0	0	CHROMOSOME_IV	10107014	10110391	-	WBGene00001204	egl-38	cds
C04G2.8	0	0	0	0	0	0	0	0	0	0	CHROMOSOME_IV	10110326	10111556	-	WBGene00007307		cds
C04G2.9	0	0	0	0	0	0	0	0	0	0	CHROMOSOME_IV	10112869	10114209	+	WBGene00007308		cds
C04G6.1	0	0	0	0	0	0	0	0	0	0	CHROMOSOME_II	5104109	5108892	+	WBGene00003402	mpk-2	cds
C04G6.10	0	0	0	0	0	0	0	0	0	0	CHROMOSOME_II	5101976	5102638	+	WBGene00015458		cds
C04G6.11	0	0	0	0	0	0	0	0	0	0	CHROMOSOME_II	5103332	5103825	-	WBGene00015459		cds
C04G6.13	0	0	0	0	0	0	0	0	0	0	CHROMOSOME_II	5094237	5095362	+	WBGene00077489		cds
C04G6.2	0	0	0	0	0	0.140565	0	0	0	0	CHROMOSOME_II	5093228	5094206	+	WBGene00015453		cds
C04G6.3	6.90073	10.6326	10.3241	9.19247	9.5813	5.73966	4.76159	3.10665	5.72632	7.18705	CHROMOSOME_II	5083840	5091628	-	WBGene00004040	pld-1	cds
C04G6.4	2.48834	1.0866	3.59695	4.06145	2.6565	5.98655	7.61271	2.28688	2.85796	2.84445	CHROMOSOME_II	5081487	5083433	-	WBGene00015454		cds
C04G6.5	0	0	0	0	0	0	0	0	0	0	CHROMOSOME_II	5085777	5086113	+	WBGene00015455		cds
C04G6.6	0	1.35524	0.711479	0.606496	0.281622	0.140565	0	0	0	0	CHROMOSOME_II	5099429	5100233	-	WBGene00015456		cds
C04G6.7	0	0	0	0	0	0.140565	0	0	0	0	CHROMOSOME_II	5100403	5101774	-	WBGene00015457		cds
C04H4.1	0	0	0	0	0	0	0	0	0	0	CHROMOSOME_II	7958793	7960186	+	WBGene00007311		cds
C04H5.1	0.679874	0.813946	0.487998	0.156952	0	0.140565	0	0	0	0	CHROMOSOME_II	14534223	14535191	+	WBGene00007312		cds
C04H5.2	0	0	0	0	0	0	0	0	0	0.224383	CHROMOSOME_II	14535848	14537504	-	WBGene00007313	clec-147	cds
C04H5.3	0	0	0	0	0	0	0	0	0	0	CHROMOSOME_II	14540744	14548716	-	WBGene00007314	gcy-29	cds
C04H5.6	6.10527	11.7705	8.51649	9.91906	7.9884	10.1422	5.71196	3.10665	9.08662	9.65526	CHROMOSOME_II	14552430	14561521	-	WBGene00003392	mog-4	cds
C04H5.7	0	0	0	0	0	0	0	0	0	0	CHROMOSOME_II	14537871	14539087	+	WBGene00007315		cds
C04H5.8	0	0	0	0	0	0	0	0	0	0	CHROMOSOME_II	14550838	14552410	+	WBGene00007316	nlp-41	cds
C05A2.1	0	0	0	0	0	0	0	0	0	0.224383	CHROMOSOME_V	10702529	10704886	+	WBGene00004083	pph-1	cds
C05A9.1	0	0	0	0	0	0	0	0	0	0	CHROMOSOME_X	10854255	10859228	-	WBGene00003999	pgp-5	cds
C05A9.2	0	0	0	0	0	0	0	0.819766	0	0	CHROMOSOME_X	10842617	10844609	-	WBGene00007317		cds
C05B10.1	0	0	0	0.156952	0.106861	0.140565	0	0	0	0.224383	CHROMOSOME_IV	6842953	6844955	+	WBGene00003043	lip-1	cds
C05B5.1	0	0	0	0	0	0	0	0	0	0	CHROMOSOME_III	9987652	9988371	-	WBGene00007319		cds
C05B5.11	0	0	0	0	0	0	0	0	0	0	CHROMOSOME_III	10004376	10004875	+	WBGene00045242		cds
C05B5.12	0	0	0	0	0	0	0	0	0	0	CHROMOSOME_III	9987290	9987639	+	WBGene00194886		cds
C05B5.16	0	0	0.162666	0	0	0	0	0	0	0	CHROMOSOME_III	10012346	10013115	+	WBGene00219280		cds
C05B5.17	0	0	0	0	0	0	0	0	0	0	CHROMOSOME_III	9998453	9999246	-	WBGene00219314		cds
C05B5.2	0	0	0	0	0	0	0	0	0	0	CHROMOSOME_III	9999730	10000427	-	WBGene00007320		cds
C05B5.3	1.12859	0	0	0	0	0	0	0	0.481529	0	CHROMOSOME_III	9996122	9997831	-	WBGene00004100	pqn-8	cds
C05B5.4	0	0	0	0	0	0	0	1.46711	0.481529	1.94692	CHROMOSOME_III	9993796	9996146	+	WBGene00007321		cds
C05B5.5	0	0	0	0	0	0	0	0	0	0	CHROMOSOME_III	10001286	10003024	+	WBGene00007322		cds
C05B5.6	0	0	0	0	0	0	0	0	0	0	CHROMOSOME_III	10007883	10010087	-	WBGene00007323	fbxa-155	cds
C05B5.7	0	0	0	0	0	0	0	0	0	0	CHROMOSOME_III	10014503	10016444	-	WBGene00004344	rgs-1	cds
C05B5.8	0	0	0	0	0	0	0	0	0	0.448767	CHROMOSOME_III	10005367	10006694	-	WBGene00007324		cds
C05C10.1	0	0	0	0	0	0	0	0	0	0	CHROMOSOME_II	9918066	9920509	-	WBGene00007328	pho-10	cds
C05C10.2	4.41239	5.75296	6.62531	9.41336	9.71823	9.08255	13.8031	12.599	7.61082	14.6744	CHROMOSOME_II	9922189	9930771	+	WBGene00007329		cds
C05C10.3	2.48834	7.27018	5.89405	7.95039	7.57599	8.66444	8.09114	6.21329	4.78407	14.5259	CHROMOSOME_II	9934345	9936836	-	WBGene00007330		cds
C05C10.4	0	0	0	0	0	0	0.475186	0	0	0	CHROMOSOME_II	9931786	9934384	+	WBGene00007331	pho-11	cds
C05C10.5	6.90073	8.13946	17.4785	28.3757	76.4223	85.641	95.2221	83.9657	98.8471	88.3887	CHROMOSOME_II	9939095	9940278	+	WBGene00007332		cds
C05C10.6	10.1709	20.1826	22.1533	21.6596	27.1672	26.5898	24.2767	24.8532	21.3671	32.6386	CHROMOSOME_II	9940702	9943988	+	WBGene00007333	ufd-3	cds
C05C10.7	4.97668	6.1876	8.15012	6.91566	5.7115	4.5359	2.38242	0	0.471125	0.224383	CHROMOSOME_II	9938047	9938904	-	WBGene00007334		cds
C05C10.8	0	0	0	0	0	0	0	0	0	0	CHROMOSOME_II	9917063	9917884	-	WBGene00086567		cds
C05C12.1	0	0	0	0	0	0	0	0	0	0	CHROMOSOME_IV	11253963	11255698	+	WBGene00007335		cds
C05C12.3	0	0	0	0	0	0	0	0	0	0	CHROMOSOME_IV	11248880	11259443	-	WBGene00001795	gtl-1	cds
C05C12.4	0	0	0.162666	0	0	0	0	0	0	0	CHROMOSOME_IV	11246426	11248030	-	WBGene00007336		cds
C05C12.5	0	0	0	0	0	0	0	0	0	0	CHROMOSOME_IV	11260309	11261148	-	WBGene00007337		cds
C05C12.6	0	0	0	0	0	0.140565	1.4288	0	0	0.749075	CHROMOSOME_IV	11231648	11233101	-	WBGene00007338		cds
C05C8.1	4.41239	4.72169	5.52768	6.97183	8.18321	6.86418	8.56632	5.39353	7.16051	3.89044	CHROMOSOME_V	7239751	7241348	+	WBGene00015460		cds
C05C8.2	17.9827	25.2796	17.7019	13.5232	11.6117	13.7013	8.09438	7.85283	10.4792	10.9256	CHROMOSOME_V	7231163	7232731	+	WBGene00015461		cds
C05C8.3	0	0	0.548813	0	0	0	0	0	0	0	CHROMOSOME_V	7225351	7226296	+	WBGene00001428	fkb-3	cds
C05C8.4	6.78515	8.62944	11.1177	12.2036	11.8204	9.78538	6.65585	6.21329	14.7921	11.0775	CHROMOSOME_V	7226357	7230830	-	WBGene00001563	gei-6	cds
C05C8.5	3.84809	11.1226	14.5915	17.1584	16.4983	18.0588	15.7168	20.8406	17.5877	13.5423	CHROMOSOME_V	7232655	7234810	-	WBGene00015462		cds
C05C8.6	30.0912	43.7831	43.5144	51.2077	51.0567	40.3616	48.0716	42.3285	52.2607	48.9461	CHROMOSOME_V	7234906	7237112	-	WBGene00015463	hpo-9	cds
C05C8.7	0	0	0.446961	0	0.140811	0.246884	0	0	0	0	CHROMOSOME_V	7242889	7247279	-	WBGene00015464		cds
C05C8.8	0	0	0	0	0	0	0	0	0	0	CHROMOSOME_V	7252307	7255139	-	WBGene00015465		cds
C05C8.9	1.80847	5.59097	4.75539	6.10959	5.7115	6.26409	4.27992	4.9186	3.83142	7.33551	CHROMOSOME_V	7237375	7239644	+	WBGene00015466	hyls-1	cds
C05C9.1	0	0	0	0	0	0	0	0	0	0	CHROMOSOME_X	11160915	11163620	+	WBGene00007325		cds
C05C9.2	0	0	0	0	0	0	0	0	0	0	CHROMOSOME_X	11152999	11157577	+	WBGene00007326		cds
C05C9.3	0.679874	0	0	0.156952	0.106861	0	0	0	0	0	CHROMOSOME_X	11142905	11152754	-	WBGene00007327		cds
C05D10.1	0	0.379305	0	0	0	0.668579	3.3263	4.01262	2.38684	5.54044	CHROMOSOME_III	6080512	6084686	+	WBGene00015477	attf-4	cds
C05D10.2	0	0	0	0.135641	0	0	0	0	0	0	CHROMOSOME_III	6067806	6072025	+	WBGene00015478		cds
C05D10.3	0	0	0	0	0	0	0	0	0	0	CHROMOSOME_III	6084622	6087404	-	WBGene00015479	wht-1	cds
C05D10.4	0	0.75861	0.162666	0	0.495345	0.740653	0.953616	0	1.43418	0.224383	CHROMOSOME_III	6088634	6102810	-	WBGene00015480		cds
C05D11.1	22.9594	30.8193	23.0516	24.5118	22.4313	16.9992	18.5485	19.3296	17.1582	18.7858	CHROMOSOME_III	6436556	6439906	+	WBGene00015481		cds
C05D11.10	6.55399	6.1876	5.44709	7.36521	5.06031	4.39892	2.38242	2.4593	3.82102	2.46822	CHROMOSOME_III	6430985	6431740	-	WBGene00015487	mrps-17	cds
C05D11.11	22.1639	26.6349	24.8152	42.4685	52.1053	35.7608	45.1978	42.0698	61.8809	64.076	CHROMOSOME_III	6440093	6442948	-	WBGene00003214	mel-32	cds
C05D11.12	4.29681	10.0913	12.866	12.4749	17.9543	18.5868	22.8414	14.1523	23.8579	22.9074	CHROMOSOME_III	6444640	6446891	-	WBGene00002855	let-721	cds
C05D11.13	0.679874	2.44184	0.548813	1.5986	1.9374	4.85844	3.80798	5.47974	1.91571	2.54414	CHROMOSOME_III	6443023	6443919	-	WBGene00015488		cds
C05D11.2	1.12859	4.01439	7.39909	5.80923	6.60923	5.45853	3.80473	7.5942	4.30255	4.86729	CHROMOSOME_III	6433185	6436448	+	WBGene00006516	vps-16	cds
C05D11.3	13.8015	7.49152	12.5619	19.096	20.1104	13.9068	15.2319	13.1601	14.269	19.4624	CHROMOSOME_III	6432129	6433101	+	WBGene00006515	tag-170	cds
C05D11.4	0	0	0	0	0	0	0	0	0	0	CHROMOSOME_III	6407076	6409965	+	WBGene00002881	let-756	cds
C05D11.5	0	0	0	0	0	0.246884	0.950372	0	0	0	CHROMOSOME_III	6409983	6411506	-	WBGene00015483		cds
C05D11.6	0	0	0.223481	0	0.106861	0.140565	0	0	0	0	CHROMOSOME_III	6411527	6414940	-	WBGene00003523	nas-4	cds
C05D11.7	4.52796	9.11137	5.99591	6.40219	9.62527	10.8792	5.22704	10.6146	11.411	8.30557	CHROMOSOME_III	6415719	6421659	-	WBGene00015484		cds
C05D11.8	0	1.19325	0.386147	0.877778	0.990689	0.140565	0	0	0	0	CHROMOSOME_III	6422406	6427252	-	WBGene00015485		cds
C05D11.9	7.46502	8.13946	6.34102	6.53005	5.62856	5.63334	4.76159	3.92641	5.2448	6.13427	CHROMOSOME_III	6427478	6430882	-	WBGene00015486		cds
C05D12.1	0	0	0	0.156952	0	0	0	0	0	0	CHROMOSOME_II	11411818	11415708	-	WBGene00007339		cds
C05D12.2	0	0	0	0	0	0	0	0	0	0	CHROMOSOME_II	11418250	11423317	+	WBGene00007340		cds
C05D12.3	0	0	0	0	0	0	0	0	0	0	CHROMOSOME_II	11424766	11430535	+	WBGene00014666		cds
C05D12.4	0	0	0	0	0	0	0	0	0	0	CHROMOSOME_II	11431804	11432702	+	WBGene00007341		cds
C05D12.5	0	0	0	0	0	0	0	0	0	0	CHROMOSOME_II	11434157	11434894	+	WBGene00007342		cds
C05D12.7	0	0	0	0	0	0	0	0	0	0	CHROMOSOME_II	11410050	11411911	+	WBGene00044029		cds
C05D2.1	0	0	0.162666	0	1.34021	4.53948	8.57281	7.68041	12.8556	8.68181	CHROMOSOME_III	5624972	5632277	+	WBGene00000900	daf-4	cds
C05D2.10	14.3657	19.1514	23.6978	23.2505	28.9148	29.2534	19.0366	25.5867	33.8556	19.8352	CHROMOSOME_III	5597914	5600018	-	WBGene00015470		cds
C05D2.3	0	0	0	0	0	0	0	0	0	0	CHROMOSOME_III	5614930	5617230	+	WBGene00015467		cds
C05D2.4	0	0	0	0	0	0	0	0	0	0	CHROMOSOME_III	5612232	5614637	+	WBGene00000239	bas-1	cds
C05D2.5	14.2502	21.7039	23.2311	26.6706	22.6701	19.6807	10.4736	21.1854	21.8694	21.7062	CHROMOSOME_III	5604417	5607511	+	WBGene00001514	xnd-1	cds
C05D2.6	3.84809	4.44904	7.58153	5.99526	7.1825	8.72577	9.048	7.85283	5.23439	8.52996	CHROMOSOME_III	5600340	5603614	-	WBGene00015468	madf-11	cds
C05D2.8	1.12859	0.813946	0.223481	0	0.354534	0.774898	0.475186	2.28688	0.471125	0	CHROMOSOME_III	5607466	5610304	-	WBGene00015469		cds
C05D9.1	0	0.379305	0.325332	0	0.810916	7.53993	9.51994	8.50017	5.68471	7.63582	CHROMOSOME_X	1128981	1132922	+	WBGene00004927	snx-1	cds
C05D9.2	0	0	0	0	0	0	0	0	0	0	CHROMOSOME_X	1125167	1128285	+	WBGene00015471	lmp-2	cds
C05D9.3	0	0	0	0	0	0	0	0	0	0	CHROMOSOME_X	1111900	1116791	+	WBGene00015472		cds
C05D9.4	0	0	0	0	0	0	0	0	0	0	CHROMOSOME_X	1108064	1110107	+	WBGene00015473		cds
C05D9.5	0	0	0	0	0.140811	3.06535	3.33279	1.46711	2.39724	3.66945	CHROMOSOME_X	1104209	1106244	+	WBGene00002062	ife-4	cds
C05D9.7	0	0	0.162666	0	0	3.69968	1.90074	2.20067	1.90531	2.31976	CHROMOSOME_X	1117194	1119404	-	WBGene00015474		cds
C05D9.9	0	0	0	0	0	0	0	0	0	0	CHROMOSOME_X	1122418	1124231	-	WBGene00015476		cds
C05E11.1	0	0	0	0.271281	1.2673	6.09287	13.8096	2.20067	4.29214	5.24013	CHROMOSOME_X	4588739	4590420	+	WBGene00015492	lnp-1	cds
C05E11.2	0	0	0	0	0	0	0	0	0	0	CHROMOSOME_X	4586890	4587966	+	WBGene00015493		cds
C05E11.3	0	0	0	0	0	0.881218	0	0	0.471125	0.224383	CHROMOSOME_X	4579480	4581614	+	WBGene00015494		cds
C05E11.4	0	0	0	0	0	0	0	0	0	0	CHROMOSOME_X	4571422	4573888	+	WBGene00000133	amt-1	cds
C05E11.5	0	0	0	0	0	0	0.953616	0	0	0	CHROMOSOME_X	4565276	4569367	+	WBGene00000136	amt-4	cds
C05E11.6	0	0	0	0	0	0	0	0	0	0	CHROMOSOME_X	4562169	4562811	+	WBGene00015495		cds
C05E11.7	0	0	0	0	0	0	0	0	0.481529	0	CHROMOSOME_X	4581571	4585638	-	WBGene00015496		cds
C05E11.8	0	0	0	0	0	0	0	0	0	0	CHROMOSOME_X	4591254	4592477	-	WBGene00001455	flp-12	cds
C05E4.1	0	0	0	0	0	0	0.475186	0	0	0.749075	CHROMOSOME_V	762735	764658	+	WBGene00005643	srp-2	cds
C05E4.10	0	0	0	0	0	0	0	0	0	0	CHROMOSOME_V	734421	736272	-	WBGene00005613	srj-25	cds
C05E4.11	0	0	0	0	0	0	0	0	0	0	CHROMOSOME_V	736804	738871	-	WBGene00005612	srj-24	cds
C05E4.12	0	0	0	0	0	0	0	0	0	0	CHROMOSOME_V	761627	761979	-	WBGene00015491		cds
C05E4.13	0	0	0	0	0	0	0	0	0	0	CHROMOSOME_V	751327	752780	-	WBGene00006288	str-262	cds
C05E4.14	0	0	0	0	0	0	0	0	0	0	CHROMOSOME_V	728310	734280	+	WBGene00005228	srh-2	cds
C05E4.15	0	0	0	0	0	0	0	0	0	0	CHROMOSOME_V	760191	761030	-	WBGene00206359		cds
C05E4.2	0	0	0	0	0	0	0	0	0	0	CHROMOSOME_V	756470	757893	+	WBGene00006087	str-20	cds
C05E4.3	0	0	0	0	0	0	0	0	0	0	CHROMOSOME_V	753335	755049	+	WBGene00005642	srp-1	cds
C05E4.4	0	0	0	0	0	0	0	0	0	0	CHROMOSOME_V	748345	750468	+	WBGene00005516	sri-4	cds
C05E4.6	0	0	0	0	0	0	0	0	0	0	CHROMOSOME_V	743649	745476	+	WBGene00006182	str-134	cds
C05E4.7	0	0	0	0	0	0	0	0	0	0	CHROMOSOME_V	742121	743274	+	WBGene00015489		cds
C05E4.9	0	0	0.487998	0	0	0	0	0	0	0	CHROMOSOME_V	724208	728104	-	WBGene00001564	icl-1	cds
C05E7.1	0	0	0	0	0	0	0	0	0	0	CHROMOSOME_X	12941371	12943477	-	WBGene00007343		cds
C05E7.2	0	0	0	0	0	0	0	0	0	0	CHROMOSOME_X	12938627	12940641	-	WBGene00007344		cds
C05E7.3	0	0	0	0	0	0	0	0	0	0	CHROMOSOME_X	12945546	12946492	-	WBGene00007345		cds
C05E7.4	0	0	0	0	0	0	0	0	0	0	CHROMOSOME_X	12965415	12968661	+	WBGene00007346	frpr-2	cds
C05G5.1	0	0	0	0	0	0	0	0	0	0	CHROMOSOME_X	14734377	14740019	-	WBGene00007347		cds
C05G5.2	0	0	0	0.156952	0.985677	0.915463	1.90074	2.37309	1.43418	0.897533	CHROMOSOME_X	14747251	14750321	+	WBGene00007348		cds
C05G5.3	0	0	0	0.156952	0.140811	0.140565	2.37917	0	1.43418	2.84445	CHROMOSOME_X	14750788	14751942	-	WBGene00007349		cds
C05G5.4	0	0.21732	0.487998	0.877778	0.776967	8.06436	8.55659	6.68822	10.0185	11.6022	CHROMOSOME_X	14753955	14756390	+	WBGene00007350	sucl-1	cds
C05G5.5	0	0	0	0	0	0	0	0	0	0	CHROMOSOME_X	14756006	14760894	-	WBGene00007351		cds
C05G5.7	0	0	0	0	0	0	0	0	0	0	CHROMOSOME_X	14743601	14743711	-	WBGene00050939		cds
C05G6.1	0	0	0	0	0.140811	0.140565	0.475186	0	1.43418	0	CHROMOSOME_IV	627537	633965	+	WBGene00015497	nhr-76	cds
C05H8.1	0	0.379305	0.162666	0	0.140811	0	0.475186	0	0	0.448767	CHROMOSOME_III	5635437	5654514	+	WBGene00000518	ckk-1	cds
C06A1.1	51.7928	64.4436	94.9966	94.7864	92.3601	90.2255	79.4728	115.162	115.427	124.189	CHROMOSOME_II	10559958	10563349	-	WBGene00007352		cds
C06A1.2	0	0	0	0	0	0	0	0	0	0	CHROMOSOME_II	10570543	10571991	+	WBGene00007353		cds
C06A1.3	0.564296	0	0	0	0	0.140565	0	0	0	0	CHROMOSOME_II	10572204	10574011	+	WBGene00007354		cds
C06A1.5	27.4737	32.3445	39.5116	29.8444	28.6582	17.2082	32.3613	17.8201	19.0635	25.5967	CHROMOSOME_II	10579307	10579904	+	WBGene00007355	rpb-6	cds
C06A1.6	0	0	0	0	0	0	0	0	0	0	CHROMOSOME_II	10564115	10564618	-	WBGene00007356		cds
C06A1.7	0	0	0	0	0	0	0	0	0	0	CHROMOSOME_II	10564852	10565341	+	WBGene00044235		cds
C06A12.3	0	0	0	0	0	0.140565	0	0.733557	0.963057	1.72253	CHROMOSOME_IV	17427680	17429566	+	WBGene00007357		cds
C06A12.4	0	0	0	0	0	0	0	0	0	0	CHROMOSOME_IV	17432940	17440054	-	WBGene00001550	gcy-27	cds
C06A12.5	0	0	0	0	0	0	0	0	0	0	CHROMOSOME_IV	17429719	17431931	-	WBGene00007358	lact-6	cds
C06A12.8	0	0	0	0	0	0	0	0	0	0	CHROMOSOME_IV	17437301	17438118	+	WBGene00007359		cds
C06A5.1	0.679874	0.869282	1.09763	1.01342	1.31127	0.881218	1.4288	2.37309	0.481529	0.448767	CHROMOSOME_I	6012060	6021985	+	WBGene00015499		cds
C06A5.10	0	0.21732	0.548813	0.292593	0.776967	0.421694	0.475186	0.819766	0.471125	0.448767	CHROMOSOME_I	5982521	5982971	-	WBGene00015506		cds
C06A5.11	4.41239	4.71767	6.21939	6.51652	5.49277	6.65154	2.37917	3.19286	5.69511	5.01236	CHROMOSOME_I	5990741	5992670	+	WBGene00004803		cds
C06A5.12	0	0.75861	1.64644	1.86988	1.80662	2.00574	2.38242	0.733557	0.94225	2.09537	CHROMOSOME_I	6004655	6007597	-	WBGene00044414		cds
C06A5.2	0.679874	0	0	0	0.106861	0.493769	0	0	0.481529	0	CHROMOSOME_I	6006335	6007326	+	WBGene00015500		cds
C06A5.3	6.33643	16.3343	14.1658	16.7786	18.6873	17.2839	15.2287	17.0866	15.7344	21.4093	CHROMOSOME_I	5986494	5990583	+	WBGene00015501		cds
C06A5.4	3.84809	5.04566	3.09066	1.77687	1.38419	0.634333	0.953616	0.819766	0.471125	0.224383	CHROMOSOME_I	5980793	5981590	-	WBGene00015502	madf-7	cds
C06A5.5	1.24417	2.92779	2.0934	2.47638	2.97708	1.09027	1.4288	0	0	0	CHROMOSOME_I	5981818	5982454	-	WBGene00015503		cds
C06A5.6	30.8731	32.9764	33.9246	31.7008	42.0414	26.6782	30.4703	37.4961	32.903	30.4639	CHROMOSOME_I	5978692	5985873	-	WBGene00015504		cds
C06A5.7	4.18123	2.92779	10.996	8.0221	9.48947	8.48605	9.99188	8.58638	9.97685	9.87626	CHROMOSOME_I	5992672	6001101	-	WBGene00006823	unc-94	cds
C06A5.8	1.92404	2.11385	4.6748	4.71057	5.63358	5.4207	2.8576	8.24155	2.86836	4.04229	CHROMOSOME_I	6008080	6009608	-	WBGene00015505		cds
C06A5.9	4.97668	13.9518	17.8448	14.0813	13.9375	10.2142	11.9024	6.86064	10.9087	7.48397	CHROMOSOME_I	6009783	6011525	-	WBGene00004380	rnf-1	cds
C06A6.2	0	0	0.162666	0	0.281622	2.04356	3.33279	0.733557	1.90531	3.06883	CHROMOSOME_IV	7846630	7854550	+	WBGene00015507		cds
C06A6.3	6.45201	8.84273	5.95487	8.60729	8.00344	10.3441	17.6176	6.47192	7.59002	7.33212	CHROMOSOME_IV	7830550	7832428	+	WBGene00015508	mvb-12	cds
C06A6.4	10.7488	11.9365	13.1898	18.4198	27.9202	24.0382	15.2157	25.9755	20.0577	20.5809	CHROMOSOME_IV	7826316	7829289	-	WBGene00015509		cds
C06A6.5	0	0	0.223481	0.292593	0.422433	4.50882	6.66882	0.733557	4.77367	5.53705	CHROMOSOME_IV	7832331	7834663	-	WBGene00015510		cds
C06A6.7	0	0	0	0	0	0	0	0	0	0	CHROMOSOME_IV	7837361	7837973	-	WBGene00015511		cds
C06A8.1	37.9914	33.8024	28.1477	26.3276	24.5635	23.9733	16.6477	18.4675	21.3463	31.1371	CHROMOSOME_II	7773828	7777780	-	WBGene00015512	mthf-1	cds
C06A8.2	1.24417	5.85961	6.46264	5.27444	5.44879	4.50524	3.80798	3.19286	3.30828	5.08828	CHROMOSOME_II	7779290	7781202	-	WBGene00015513		cds
C06A8.3	0	0.21732	0.487998	0.135641	0.810916	3.34648	2.37593	3.10665	4.74246	2.31976	CHROMOSOME_II	7790508	7791326	+	WBGene00015514		cds
C06A8.4	3.61693	7.70884	9.26901	9.70595	11.6896	6.93625	9.51994	9.31994	6.66857	16.9942	CHROMOSOME_II	7783765	7784595	+	WBGene00004823	skr-17	cds
C06A8.5	13.3391	21.3286	23.5762	22.8358	21.4117	16.646	15.2351	10.3121	13.3163	11.5229	CHROMOSOME_II	7781527	7783296	+	WBGene00015515	spdl-1	cds
C06A8.6	0	0	0	0	0	0	0	0	0	0	CHROMOSOME_II	7772515	7773860	+	WBGene00015516		cds
C06A8.7	0	0	0	0	0	0	0	0	0	0	CHROMOSOME_II	7763885	7765464	-	WBGene00005262	srh-39	cds
C06A8.8	0	0	0.162666	0	0	0.246884	0	0	0	0	CHROMOSOME_II	7765493	7771965	-	WBGene00015517		cds
C06A8.9	0	0	0	0	0	0	0	0	0	0	CHROMOSOME_II	7785022	7794267	-	WBGene00001615	glr-4	cds
C06B3.1	0	0	0	0	0	0	0	0	0	0	CHROMOSOME_V	13902781	13903872	+	WBGene00007360		cds
C06B3.10	0	0	0	0	0	0	0	0	0	0	CHROMOSOME_V	13918627	13920018	+	WBGene00006277	str-250	cds
C06B3.11	0	0	0	0	0	0	0	0	0	0	CHROMOSOME_V	13921016	13922390	+	WBGene00005933	srx-42	cds
C06B3.12	0	0	0	0	0	0	0	0	0	0	CHROMOSOME_V	13924137	13925793	+	WBGene00044114	srxa-11	cds
C06B3.13	0	0	0	0	0	0	0	0	0	0	CHROMOSOME_V	13926684	13929306	+	WBGene00044115	srxa-12	cds
C06B3.14	0	0	0	0	0	0	0	0	0	0	CHROMOSOME_V	13929789	13931238	+	WBGene00044116	srxa-13	cds
C06B3.16	0	0	0	0	0	0	0	0	0	0	CHROMOSOME_V	13931511	13932184	+	WBGene00189947		cds
C06B3.2	0	0	0	0	0	0	0	0	0	0	CHROMOSOME_V	13899499	13902639	+	WBGene00007361	oac-3	cds
C06B3.3	0.679874	0	0	0	0	0	0	0	0	0	CHROMOSOME_V	13896643	13898474	-	WBGene00007362	cyp-35C1	cds
C06B3.4	0.564296	0	0	0	0.422433	5.95588	3.33279	3.10665	3.31868	3.5176	CHROMOSOME_V	13906476	13908023	+	WBGene00007363	stdh-1	cds
C06B3.5	0	0	0	0	0	0	0	0	0	0	CHROMOSOME_V	13904597	13905982	+	WBGene00007364	stdh-3	cds
C06B3.6	0.679874	0	0	0	0	0.387449	1.90723	0.819766	0	0	CHROMOSOME_V	13908114	13909499	-	WBGene00007365		cds
C06B3.7	0	0	0	0	0	0	0	0	0	0	CHROMOSOME_V	13909734	13911510	+	WBGene00007366		cds
C06B3.8	0	0	0	0	0	0	0	0	0	0	CHROMOSOME_V	13912066	13915422	-	WBGene00001552	gcy-32	cds
C06B3.9	0	0	0	0	0	0	0	0	0	0	CHROMOSOME_V	13916482	13918037	+	WBGene00006278	str-252	cds
C06B8.1	0	0	0	0	0	0	0	0	0	0	CHROMOSOME_V	15479526	15481659	-	WBGene00007367	nhr-150	cds
C06B8.10	0	0	0	0	0	0	0	0	0	0	CHROMOSOME_V	15493962	15495743	+	WBGene00005428	srh-218	cds
C06B8.11	0	0	0	0	0	0	0	0	0	0	CHROMOSOME_V	15486370	15487100	-	WBGene00007373		cds
C06B8.2	0	0	0	0	0	0	0	0	0	0	CHROMOSOME_V	15476046	15478548	-	WBGene00007368		cds
C06B8.3	0	0	0	0	0	0	0	0	0	0	CHROMOSOME_V	15484036	15484619	-	WBGene00007369		cds
C06B8.4	0	0	0	0	0	0	0	0	0	0	CHROMOSOME_V	15491050	15492752	-	WBGene00007370	str-264	cds
C06B8.6	0	0	0	0	0	0	0	0	0	0	CHROMOSOME_V	15496251	15497549	+	WBGene00005429	srh-219	cds
C06B8.7	0	0	0	0	0	0	0	0	0	0.973458	CHROMOSOME_V	15498725	15511403	+	WBGene00007372		cds
C06B8.8	344.248	257.855	254.911	213.166	143.326	130.555	113.399	33.3518	22.6972	10.325	CHROMOSOME_V	15512148	15512755	+	WBGene00004452	rpl-38	cds
C06B8.9	0	0	0	0	0	0	0	0	0	0	CHROMOSOME_V	15488046	15489383	+	WBGene00005768	srw-21	cds
C06C3.1	6.78515	11.6085	11.9706	13.8797	12.8161	19.9311	17.6111	16.4392	13.358	18.7892	CHROMOSOME_II	9358472	9369040	+	WBGene00003196	mel-11	cds
C06C3.10	0	0	0	0	0.140811	0	0	0	0	0	CHROMOSOME_II	9375800	9377150	-	WBGene00044169		cds
C06C3.12	0	0	0	0	0	0	0	0	0	0	CHROMOSOME_II	9375048	9375789	+	WBGene00175031		cds
C06C3.3	0	0	0	0	0	0	0	0	0	0	CHROMOSOME_II	9369119	9372312	-	WBGene00007374		cds
C06C3.4	0	0	0	0	0	0	0	0	0	0	CHROMOSOME_II	9373232	9374795	+	WBGene00007375		cds
C06C3.6	0	0	0	0	0	0	0	0	0.94225	0	CHROMOSOME_II	9381169	9384936	+	WBGene00005271	srh-48	cds
C06C3.7	0	0	0	0	0	0	0	0	0	0	CHROMOSOME_II	9385480	9386478	+	WBGene00007377		cds
C06C3.8	0	0	0	0	0.140811	0	0	0	0	0	CHROMOSOME_II	9386525	9390841	-	WBGene00007378		cds
C06C3.9	0	0	0	0	0	0	0	0	0	0	CHROMOSOME_II	9376396	9378223	+	WBGene00014668		cds
C06C6.1	0	0	0	0	0	0	0	0	0	0	CHROMOSOME_V	16010690	16012092	-	WBGene00007379		cds
C06C6.2	0	0	0	0	0	0	0	0	0	0	CHROMOSOME_V	16008312	16009644	-	WBGene00006264	str-233	cds
C06C6.3	0	0	0	0	0	0	0	0	0	0	CHROMOSOME_V	16006284	16007585	-	WBGene00006262	str-231	cds
C06C6.4	0	0	0	0	0	0	0	0	0	0	CHROMOSOME_V	16002575	16004708	+	WBGene00003653	nhr-63	cds
C06C6.5	0	0	0	0	0	0	0	0	0	0	CHROMOSOME_V	15997759	16000633	-	WBGene00003640	nhr-50	cds
C06C6.6	0	0	0	0	0	0	0	0	0	0	CHROMOSOME_V	15988734	15991587	+	WBGene00007380		cds
C06C6.7	0	0	0	0	0	0	0	0	0	0	CHROMOSOME_V	15992186	15995587	+	WBGene00007381		cds
C06C6.8	0	0	0	0	0	0	0	0	0	0	CHROMOSOME_V	15997116	15997748	+	WBGene00007382		cds
C06C6.9	0	0	0	0	0	0	0	0	0	0	CHROMOSOME_V	15996194	15996725	-	WBGene00007383		cds
C06E1.1	0	0	0	0.135641	0	0.493769	0	0.733557	0.952653	2.39568	CHROMOSOME_III	8605752	8606424	+	WBGene00015518		cds
C06E1.10	3.05264	6.78825	5.1628	6.18707	3.39951	5.13957	4.75835	4.01262	6.22866	5.24013	CHROMOSOME_III	8609797	8614489	-	WBGene00015525	rha-2	cds
C06E1.11	0.679874	0.651961	0.325332	0.585185	0.354534	0	0	0	0.471125	0	CHROMOSOME_III	8614682	8616244	-	WBGene00015526		cds
C06E1.3	0	0	0	0	0	0	0	0	0	0	CHROMOSOME_III	8581022	8583830	+	WBGene00015519		cds
C06E1.4	0	0	0	0	0	0	0	0	0	0	CHROMOSOME_III	8584106	8588535	-	WBGene00001612	glr-1	cds
C06E1.5	0	0	0	0	0	0	0	0	0	0	CHROMOSOME_III	8589217	8589462	-	WBGene00015520	fip-3	cds
C06E1.6	0	0	0	0	0	0	0	0	0	1.49815	CHROMOSOME_III	8590753	8590902	-	WBGene00015521	fipr-16	cds
C06E1.7	0	0	0	0	0	0	0	0	0	0	CHROMOSOME_III	8591159	8593012	-	WBGene00015522		cds
C06E1.8	0	0	0	0	0	0	0	0	0	0	CHROMOSOME_III	8595288	8597790	-	WBGene00015523	ztf-30	cds
C06E1.9	7.13188	13.2364	11.8079	13.8178	12.068	12.5354	10.9487	12.0818	7.66284	12.5756	CHROMOSOME_III	8606428	8609703	-	WBGene00015524		cds
C06E2.1	0	0	0	0	0.106861	0	0	0	0	0	CHROMOSOME_X	8872881	8874797	-	WBGene00015527		cds
C06E2.2	0	0	0	0	0	0	0	0	0	0	CHROMOSOME_X	8879596	8880353	+	WBGene00015528		cds
C06E2.3	0	0	0	0	0	0	0	0	0	0	CHROMOSOME_X	8869572	8871782	+	WBGene00006716	ubc-21	cds
C06E2.5	0	0	0	0	0.140811	3.34648	2.8576	1.55332	2.35562	4.19075	CHROMOSOME_X	8856998	8857901	-	WBGene00015529		cds
C06E2.7	0	0	0	0	0	0	0	0	0	0	CHROMOSOME_X	8867558	8869203	-	WBGene00006717	ubc-22	cds
C06E2.8	0	0	0	0	0	0	0	0	0	0	CHROMOSOME_X	8866185	8866587	-	WBGene00002092	ins-9	cds
C06E2.9	0	0	0	0	0	0	0	0	0	0	CHROMOSOME_X	8861205	8861597	+	WBGene00044579		cds
C06E4.1	0	0	0	0	0	0	0	0	0	0	CHROMOSOME_IV	7283246	7283860	+	WBGene00015530		cds
C06E4.2	0	0	0	0	0	0.246884	0.953616	0	0	0.973458	CHROMOSOME_IV	7276872	7283075	+	WBGene00015531		cds
C06E4.3	0	0	0	0	0	0	0	0	0	0	CHROMOSOME_IV	7260874	7262017	+	WBGene00015532		cds
C06E4.4	0	0	0	0	0	0	0	0	0	0	CHROMOSOME_IV	7258642	7259526	+	WBGene00015533		cds
C06E4.5	0	0	0	0	0	0	0	0	0	0	CHROMOSOME_IV	7254979	7256253	+	WBGene00015534		cds
C06E4.6	0	0	0	0	0	0	0	0	0	0	CHROMOSOME_IV	7257206	7258237	-	WBGene00015535		cds
C06E4.7	0	0	0	0	0	0	0	0	0	0	CHROMOSOME_IV	7262226	7263225	-	WBGene00015536	glb-2	cds
C06E4.8	0	0	0	0	0	0	0	0	0	0	CHROMOSOME_IV	7284208	7285862	-	WBGene00015537		cds
C06E7.1	100.866	92.1137	77.3797	72.7337	62.7953	51.5056	49.5134	61.3132	53.1197	49.3155	CHROMOSOME_IV	5848644	5850838	+	WBGene00015538	sams-3	cds
C06E7.2	0	0	0	0	0	0	0	0	0	0	CHROMOSOME_IV	5839388	5843992	+	WBGene00015539		cds
C06E7.3	55.7837	46.2329	46.6066	55.9474	55.5889	54.5045	88.55	101.312	100.856	65.5572	CHROMOSOME_IV	5843971	5846359	-	WBGene00015540	sams-4	cds
C06E7.4	0	0.21732	0.223481	0	0.247672	1.40923	0.475186	0	0	0.67315	CHROMOSOME_IV	5850828	5859965	-	WBGene00015541		cds
C06E7.6	0	0	0	0	0	0	0	0	0	0	CHROMOSOME_IV	5864518	5865891	-	WBGene00004973	spe-27	cds
C06E7.7	0	0	0	0	0	0	0	0	0	0	CHROMOSOME_IV	5867678	5870161	-	WBGene00005728	srv-17	cds
C06E7.88	0	0	0	0	0	0	0	0	0	0	CHROMOSOME_IV	5865847	5867361	-	WBGene00189995		cds
C06E8.3	0	0	0	0	1.05859	2.78063	4.28641	0.733557	0	1.87099	CHROMOSOME_III	6990116	7002255	+	WBGene00004182	prk-1	cds
C06E8.5	0	0	0	0	0	0	0	0	0	0	CHROMOSOME_III	7002245	7005307	-	WBGene00015544		cds
C06G1.1	0	0	0	0	0	0	0	0	0	0	CHROMOSOME_X	16633290	16637560	+	WBGene00015545		cds
C06G1.2	0	0	0.162666	0	0	0	0	0	0	0	CHROMOSOME_X	16621741	16622666	+	WBGene00015546		cds
C06G1.4	0	0	0.325332	0.428233	1.48102	7.57417	8.56957	10.1397	8.59469	11.5296	CHROMOSOME_X	16613376	16616790	+	WBGene00015547	ain-1	cds
C06G1.5	0	0	0.325332	0	0	0.140565	0.950372	0.819766	0	2.24722	CHROMOSOME_X	16638205	16642988	-	WBGene00015548		cds
C06G1.6	0	0	0	0	0	0	0	0	0	0	CHROMOSOME_X	16652032	16654410	-	WBGene00077591		cds
C06G3.1	0	0	0	0	0	0	0	0.819766	0	0.224383	CHROMOSOME_IV	7050091	7053424	+	WBGene00003695	nhr-105	cds
C06G3.10	2.37276	9.49067	6.90961	7.02999	10.9365	9.11321	6.19364	4.65997	7.17091	7.48397	CHROMOSOME_IV	7036949	7039569	-	WBGene00000585	cogc-2	cds
C06G3.11	10.1709	12.1025	11.8717	9.00644	6.02707	5.03325	3.32955	4.01262	1.43418	2.24383	CHROMOSOME_IV	7043924	7044593	-	WBGene00006572		cds
C06G3.2	8.1313	7.7008	13.7599	9.549	11.1553	6.37399	7.14077	7.03306	5.2448	7.18705	CHROMOSOME_IV	7040198	7043683	+	WBGene00002228	klp-18	cds
C06G3.3	0	0	0	0	0	0	0	0.819766	0	0	CHROMOSOME_IV	7036112	7036458	+	WBGene00015549		cds
C06G3.4	0.679874	0	0	0	0	0	0	0	0	0	CHROMOSOME_IV	7028447	7030992	+	WBGene00015550		cds
C06G3.5	0	0	0	0.449544	0.247672	1.40923	1.4288	6.94685	3.34989	0.448767	CHROMOSOME_IV	7024200	7028135	+	WBGene00015551		cds
C06G3.6	0	1.78988	0.487998	0.135641	0.670105	4.0493	2.8576	3.8402	2.85796	6.43797	CHROMOSOME_IV	7017615	7020191	+	WBGene00015552		cds
C06G3.7	11.3131	8.73609	11.5449	7.58609	7.65392	7.35795	4.75835	9.31994	6.17664	3.44167	CHROMOSOME_IV	7011992	7016569	+	WBGene00015553	trxr-1	cds
C06G3.8	4.06565	6.07693	5.95487	5.381	4.60894	5.63693	4.7551	9.06131	3.78981	5.53705	CHROMOSOME_IV	7031280	7032548	-	WBGene00015554		cds
C06G3.9	8.92675	15.2909	11.5236	16.4724	18.0122	17.2118	16.6607	11.5206	13.7771	17.5155	CHROMOSOME_IV	7032688	7036971	-	WBGene00015555		cds
C06G4.1	5.4254	5.80427	5.69035	6.0592	7.75075	5.63334	5.23678	7.68041	6.15583	6.58643	CHROMOSOME_III	7987064	7990484	+	WBGene00015557		cds
C06G4.2	11.3131	14.1017	13.354	15.6586	19.9457	14.6438	15.2189	17.3029	19.0427	14.2948	CHROMOSOME_III	7981002	7986272	+	WBGene00000542	clp-1	cds
C06G4.4	0	0	0.162666	0	0	0	0	0	0	0	CHROMOSOME_III	7977151	7979695	-	WBGene00015558		cds
C06G4.5	0	0	0	0	0	0	0	0	0	0.448767	CHROMOSOME_III	7990724	7996383	-	WBGene00015559	npr-17	cds
C06G4.6	0	0	0	0	0	0	0	0	0	0	CHROMOSOME_III	8004332	8005770	+	WBGene00044446		cds
C06G8.1	0	0	0.162666	0.156952	0	0	0	0	0	0	CHROMOSOME_IV	10778966	10780691	-	WBGene00007384	swt-3	cds
C06G8.2	0	0	0	0	0	0	0	0	0	0	CHROMOSOME_IV	10790578	10794544	+	WBGene00003876	pept-2	cds
C06G8.3	0	0	0	0	0	0	0	0	0	0	CHROMOSOME_IV	10799634	10802226	+	WBGene00014669		cds
C06G8.4	0	0	0	0	0	0	0	0	0	0	CHROMOSOME_IV	10785070	10786811	-	WBGene00005085	srd-7	cds
C06H2.1	57.1027	73.4211	62.5009	70.8422	50.5452	39.9092	42.337	49.5763	64.8845	62.1359	CHROMOSOME_V	11122743	11123851	-	WBGene00007385	atp-5	cds
C06H2.2	1.69289	4.77703	5.32546	5.381	5.23507	5.03684	5.24002	4.48755	3.30828	2.31976	CHROMOSOME_V	11125204	11127260	+	WBGene00007386		cds
C06H2.3	4.29681	1.78988	5.28443	3.40455	4.8516	3.73034	3.81122	0.733557	5.21358	4.49106	CHROMOSOME_V	11127477	11130067	+	WBGene00007387	jmjd-5	cds
C06H2.4	0	0	0.162666	0.156952	0.106861	0.668579	0.950372	1.63953	0.481529	0.749075	CHROMOSOME_V	11141480	11143045	+	WBGene00007388	folt-1	cds
C06H2.5	0	0	0	0	0	0	0	0	0	0	CHROMOSOME_V	11134591	11140305	+	WBGene00007389	glb-3	cds
C06H2.6	18.9821	13.8371	31.2215	32.2744	32.0338	27.4189	39.0366	28.8658	35.6361	46.6331	CHROMOSOME_V	11124278	11125040	+	WBGene00007390		cds
C06H2.7	0	0	0	0.292593	4.91448	16.6874	17.1359	10.9595	10.448	12.5722	CHROMOSOME_V	11143041	11144732	-	WBGene00007391		cds
C06H5.1	0	0	0	0	0	0	0	0	0	0	CHROMOSOME_V	17895281	17896778	-	WBGene00007392	fbxa-156	cds
C06H5.11	0	0	0	0	0	0	0	0	0	0	CHROMOSOME_V	17893857	17894033	-	WBGene00206499		cds
C06H5.2	0	0	0	0	0	0	0	0	0	0	CHROMOSOME_V	17899802	17901887	+	WBGene00007393	fbxa-157	cds
C06H5.6	0	0	0	0	0	0.387449	0	0	0	0	CHROMOSOME_V	17879818	17888958	-	WBGene00007394		cds
C06H5.7	0	0.21732	0	0.292593	0	0.140565	0	0	0	0	CHROMOSOME_V	17910291	17917218	+	WBGene00007395	dcar-1	cds
C06H5.8	0	0	0	0	0.281622	0.421694	0	0	0	0.224383	CHROMOSOME_V	17919011	17921727	+	WBGene00044795		cds
C07A12.1	0	0	0	0	0	0	0	0	0	0	CHROMOSOME_X	4554665	4558829	+	WBGene00001821	ham-2	cds
C07A12.18	0	0	0	0	0	0	0	0	0	0	CHROMOSOME_X	4545675	4549921	-	WBGene00206364		cds
C07A12.2	0	0	0	0	0	0	0	0	0	0	CHROMOSOME_X	4544848	4545390	+	WBGene00015560		cds
C07A12.3	0	0	0	0.135641	0	1.23442	2.37917	0.819766	1.90531	2.62007	CHROMOSOME_X	4532663	4537506	+	WBGene00003628	nhr-35	cds
C07A12.4	0.679874	1.84521	3.53762	6.18707	10.2464	47.9573	82.7991	78.9609	77.321	53.2195	CHROMOSOME_X	4524159	4526508	+	WBGene00003963	pdi-2	cds
C07A12.5	0	0	0	0.135641	0	5.56485	1.90399	1.46711	7.64203	6.81082	CHROMOSOME_X	4514071	4516866	+	WBGene00005008	spr-3	cds
C07A12.7	0	0	0	0	0.140811	2.71214	2.8576	1.46711	2.37643	2.1713	CHROMOSOME_X	4517715	4521041	-	WBGene00015561		cds
C07A4.1	0	0	0	0	0	0	0	0	0	0	CHROMOSOME_X	10167037	10171609	+	WBGene00007396	tiar-3	cds
C07A4.2	0	0	0	0	0	0	0	0	0	0	CHROMOSOME_X	10172267	10174098	+	WBGene00007397		cds
C07A4.3	0	0	0	0	0	0	0	0	0	0	CHROMOSOME_X	10174926	10175868	+	WBGene00007398		cds
C07A9.1	0	0	0	0	0	0	0	0	0	0	CHROMOSOME_III	9723198	9725130	-	WBGene00007399	clec-162	cds
C07A9.10	0	0	0	0	0	0	0	0	0	0	CHROMOSOME_III	9685086	9686642	-	WBGene00007406		cds
C07A9.11	0	0	0.162666	0	0.247672	0	0	0	0.471125	0	CHROMOSOME_III	9715799	9720207	-	WBGene00003572	ncx-7	cds
C07A9.12	0	0	0	0	0	0	0	0	0	0	CHROMOSOME_III	9725201	9727455	-	WBGene00043994		cds
C07A9.13	0	0	0	0	0	0	0	0	0	0	CHROMOSOME_III	9679614	9681185	-	WBGene00044227		cds
C07A9.2	5.54098	14.157	14.4303	15.3098	11.6217	11.9695	18.0863	12.7714	17.127	15.2682	CHROMOSOME_III	9694584	9696433	-	WBGene00007400		cds
C07A9.3	5.87412	5.69762	4.34947	8.42902	11.1113	11.5478	11.4174	13.7213	7.65244	11.5263	CHROMOSOME_III	9699797	9710184	+	WBGene00006579	tlk-1	cds
C07A9.4	0	0	0	0	0	0	0	0	0	0	CHROMOSOME_III	9710165	9713844	-	WBGene00003571	ncx-6	cds
C07A9.5	0	0	0	0	0	0	0	0	0	0	CHROMOSOME_III	9681440	9682745	-	WBGene00007401		cds
C07A9.6	0	0	0	0.313904	0	0	0	0	0	0	CHROMOSOME_III	9676245	9678956	-	WBGene00007402	ugt-60	cds
C07A9.7	3.28379	5.31832	8.04827	8.80686	8.69747	7.42644	10.952	3.66779	2.36603	5.09167	CHROMOSOME_III	9690954	9694488	-	WBGene00007403	set-3	cds
C07A9.8	0	0	0	0	0	0	0	0	0	0	CHROMOSOME_III	9686849	9690169	-	WBGene00007404		cds
C07A9.9	1.12859	0	0	0	0.704055	4.18628	2.38242	3.8402	0.94225	1.3463	CHROMOSOME_III	9663210	9667445	-	WBGene00007405		cds
C07B5.2	0	0	0	0	0	0	0	0	0	0	CHROMOSOME_X	9516450	9517130	-	WBGene00007407		cds
C07B5.3	0	0	0	0	0	0	0	0	0	0	CHROMOSOME_X	9522433	9523170	-	WBGene00007408		cds
C07B5.4	0	0	0	0	0	0	0	0	0	0	CHROMOSOME_X	9529476	9536577	+	WBGene00007409		cds
C07B5.5	0	0	0.325332	0.313904	0	0	0	0	0	0	CHROMOSOME_X	9539848	9542373	+	WBGene00003828	nuc-1	cds
C07B5.6	0	0	0	0	0	0	0	0	0	0	CHROMOSOME_X	9518965	9521429	+	WBGene00007410		cds
C07B5.8	0	0	0	0	0	0	0	0	0	0	CHROMOSOME_X	9536604	9536918	-	WBGene00195209		cds
C07C7.1	0	0	0	0	0	0	0	0	0	0	CHROMOSOME_IV	9185049	9186008	+	WBGene00007411		cds
C07D10.1	0	0	0	0	0	0	0.475186	0	0	0	CHROMOSOME_II	7398967	7400504	+	WBGene00015566		cds
C07D10.2	8.59361	12.9678	13.7797	14.9804	19.0179	20.4862	15.7038	18.295	24.717	23.1318	CHROMOSOME_II	7394722	7397308	+	WBGene00015567	bath-44	cds
C07D10.3	0	0	0	0	0	0	0	0	0	0	CHROMOSOME_II	7387119	7389099	+	WBGene00015568	sre-3	cds
C07D10.4	0	0	0	0	0	0	0	0	0	0	CHROMOSOME_II	7400501	7402664	-	WBGene00003526	nas-7	cds
C07D10.5	0	0.21732	0.711479	0.271281	0.422433	2.18413	1.90399	4.74618	2.39724	3.59013	CHROMOSOME_II	7381395	7383447	+	WBGene00015569		cds
C07D10.6	0	0	0	0	0	0	0	0	0	0	CHROMOSOME_II	7379134	7379569	+	WBGene00044673		cds
C07D8.5	0	0	0	0	0	0	0	0	0	0	CHROMOSOME_X	7344001	7344505	+	WBGene00015564		cds
C07D8.6	1.12859	2.65916	1.19948	2.00553	20.3308	97.2031	99.9318	121.504	127.926	142.388	CHROMOSOME_X	7341463	7342737	+	WBGene00015565		cds
C07E3.1	9.14431	6.7802	5.52768	9.18671	11.6985	9.92594	5.71521	3.66779	9.07622	6.66236	CHROMOSOME_II	10346921	10349947	-	WBGene00007412	stip-1	cds
C07E3.10	0	0	0	0	0	0	0	0	0	0	CHROMOSOME_II	10346337	10346948	+	WBGene00007420		cds
C07E3.2	12.9924	16.4962	12.0739	14.6296	9.55236	7.49851	9.51669	8.41397	6.22866	9.35496	CHROMOSOME_II	10339632	10345056	-	WBGene00007413	pro-2	cds
C07E3.3	0	0	0	0	0	0	0	0	0	0	CHROMOSOME_II	10353573	10357460	-	WBGene00007414		cds
C07E3.4	0	0	0	0	0	0	0	0	0	0	CHROMOSOME_II	10360811	10362937	+	WBGene00007415		cds
C07E3.5	0	0	0	0	0	0	0	0	0	0	CHROMOSOME_II	10363524	10365649	-	WBGene00007416	ceh-57	cds
C07E3.6	0	0	0	0	2.71938	5.48561	1.90399	2.93423	2.35562	2.6926	CHROMOSOME_II	10367682	10369537	-	WBGene00007417	ceh-58	cds
C07E3.8	0	0	0	0	0	0	0	0	0	0	CHROMOSOME_II	10352045	10353403	+	WBGene00007418		cds
C07E3.9	0	0.21732	0.162666	0.156952	0.106861	0.774898	2.85436	5.30732	11.9342	5.84075	CHROMOSOME_II	10350700	10351557	+	WBGene00007419		cds
C07F11.1	2.37276	5.26298	11.3214	10.2194	11.6606	13.5229	23.3133	17.6477	10.9607	19.0861	CHROMOSOME_I	444002	461610	+	WBGene00006593	tol-1	cds
C07F11.2	0	0	0	0	0	0	0	0	0	0	CHROMOSOME_I	420925	423721	+	WBGene00015570		cds
C07G1.1	0	0	0	0	0	0	0	0	0.481529	0	CHROMOSOME_IV	8212567	8213709	+	WBGene00006620	try-2	cds
C07G1.2	0	0	0	0	0	0	0	0	0	0	CHROMOSOME_IV	8206600	8210921	+	WBGene00015571		cds
C07G1.3	16.0586	32.0085	28.7405	25.8723	31.829	33.9064	40.4719	36.3738	31.9295	37.5025	CHROMOSOME_IV	8176471	8188865	+	WBGene00003961	pct-1	cds
C07G1.4	19.5736	23.4897	25.507	28.7265	30.3819	24.0417	16.6575	30.6354	26.1616	39.5254	CHROMOSOME_IV	8188888	8198937	-	WBGene00006957	wsp-1	cds
C07G1.5	4.29681	3.96308	6.60553	7.30128	7.70678	8.59595	8.08465	9.88108	7.60042	7.41143	CHROMOSOME_IV	8201365	8206034	-	WBGene00004101	hgrs-1	cds
C07G1.6	0	0	0	0	0	0	0	0	0	0	CHROMOSOME_IV	8209143	8210381	-	WBGene00015572		cds
C07G1.7	0	0	0	0	0	0	0	0	0	0	CHROMOSOME_IV	8210892	8211814	-	WBGene00015573		cds
C07G1.8	9.62022	9.81867	9.36938	8.2139	6.54634	8.13285	7.13752	8.50017	11.8926	5.83736	CHROMOSOME_IV	8200588	8201221	-	WBGene00044608	glrx-22	cds
C07G2.1	29.0646	45.0548	118.37	176.751	209.116	252.322	477.448	546.003	501.9	365.46	CHROMOSOME_III	4489326	4491365	+	WBGene00000465	cpg-1	cds
C07G2.2	12.2241	20.5066	20.4277	17.2494	22.0768	17.8119	12.843	21.2716	24.2875	20.284	CHROMOSOME_III	4491596	4499450	-	WBGene00000223	atf-7	cds
C07G2.3	76.7782	63.6105	64.7599	70.4566	65.6304	54.7729	56.1757	58.8539	64.8116	65.7918	CHROMOSOME_III	4499160	4508084	-	WBGene00000380	cct-5	cds
C07G3.10	0	0	0.162666	0.313904	0	0.140565	0	0	0.481529	0	CHROMOSOME_V	3502304	3503074	+	WBGene00015578		cds
C07G3.2	0	0	0	0	0	0.246884	0	0	0	0.224383	CHROMOSOME_V	3523579	3524572	+	WBGene00015574	irg-1	cds
C07G3.3	0	0	0	0	0	0	0	0	0	0	CHROMOSOME_V	3518186	3519798	+	WBGene00006258	str-227	cds
C07G3.4	0	0	0	0	0	0	0	0	0	0	CHROMOSOME_V	3512678	3514340	+	WBGene00006257	str-226	cds
C07G3.5	0	0	0	0	0	0	0	0	0	0	CHROMOSOME_V	3510175	3512035	+	WBGene00006259	str-228	cds
C07G3.6	0	0	0	0	0	0	0	0	0	0	CHROMOSOME_V	3507819	3509248	+	WBGene00006256	str-225	cds
C07G3.8	0	0.379305	0	0	0.320584	0.140565	0	0	0	0	CHROMOSOME_V	3493634	3501760	-	WBGene00015576		cds
C07G3.9	4.41239	4.88368	4.71584	4.5323	5.4538	5.80815	7.13428	3.66779	6.65817	3.66606	CHROMOSOME_V	3503127	3506349	-	WBGene00015577	ugt-64	cds
C07H4.1	0	0	0	0	0	0	0	0.733557	0	1.49815	CHROMOSOME_II	9091047	9093634	-	WBGene00007421		cds
C07H4.2	13.1216	18.9813	19.6342	21.3322	23.9663	21.4395	24.7421	35.0368	31.5624	20.6602	CHROMOSOME_II	9094618	9098784	-	WBGene00000532	clh-5	cds
C07H6.1	2.48834	1.03127	2.82466	4.54584	7.35726	3.13384	5.71521	5.30732	3.31868	1.3463	CHROMOSOME_III	7521397	7524770	+	WBGene00002986	lig-4	cds
C07H6.2	7.46502	7.81549	13.0499	15.5578	13.7489	10.1692	13.3376	10.0535	14.8025	9.27903	CHROMOSOME_III	7520938	7521398	+	WBGene00015579		cds
C07H6.3	0	0.21732	0	0	0	0.140565	0	0.819766	0	0	CHROMOSOME_III	7508110	7515214	+	WBGene00015580	cls-1	cds
C07H6.4	9.7222	17.5748	13.2719	14.7169	13.7478	12.1137	14.2945	11.693	14.7921	9.80711	CHROMOSOME_III	7499643	7503180	+	WBGene00015581		cds
C07H6.5	7.13188	12.3712	11.1602	14.8447	11.2043	7.49493	5.23678	12.7714	6.18704	8.98212	CHROMOSOME_III	7495639	7497768	-	WBGene00000479	cgh-1	cds
C07H6.6	13.3527	19.6494	23.8195	32.5437	30.6435	26.1646	27.1213	33.9145	28.6316	26.3457	CHROMOSOME_III	7515157	7518458	-	WBGene00000537	clk-2	cds
C07H6.7	0	0	0.325332	0.156952	0.281622	0.949708	0	0.819766	1.42378	0.67315	CHROMOSOME_III	7528603	7536567	-	WBGene00003024	lin-39	cds
C07H6.8	5.65656	6.66953	5.91383	5.85962	5.31299	5.99013	2.37917	3.92641	5.2656	2.01945	CHROMOSOME_III	7518562	7520739	-	WBGene00000854	cux-7	cds
C07H6.9	0	0	0.162666	0.135641	0.281622	0	0	0	0	0	CHROMOSOME_III	7498265	7499525	-	WBGene00015582		cds
C08A9.1	0	0	0	0	0	0	0	0	0	0	CHROMOSOME_X	17092644	17094149	+	WBGene00004932	sod-3	cds
C08A9.10	0	0	0	0	0	0	0	0	0	0	CHROMOSOME_X	17081029	17081970	+	WBGene00044773		cds
C08A9.3	0	0	0	0	0	0	0	0	0	0	CHROMOSOME_X	17087808	17093225	-	WBGene00015583		cds
C08A9.6	0	0	0	0	0	1.79668	2.85436	0.819766	0.952653	1.12192	CHROMOSOME_X	17094209	17096463	-	WBGene00015586		cds
C08A9.7	0	0	0	0	0	0	0	0	0	0	CHROMOSOME_X	17099038	17100678	-	WBGene00015587	sdz-2	cds
C08A9.8	0	0	0	0	0.140811	0.281129	0.475186	0	0	0	CHROMOSOME_X	17102771	17104797	-	WBGene00015588		cds
C08A9.9	0	0	0	0	0.140811	0.668579	0	0	0	0	CHROMOSOME_X	17106625	17108170	-	WBGene00015589		cds
C08B11.1	2.93706	9.81867	16.6271	23.7446	40.7162	43.7296	66.1579	69.0375	43.3925	58.8393	CHROMOSOME_II	8017629	8020708	+	WBGene00006996	zyg-11	cds
C08B11.2	7.46502	7.43216	10.9733	11.4906	13.3164	12.5389	10.9455	10.5284	10.4896	11.8266	CHROMOSOME_II	8020728	8022510	-	WBGene00001835	hda-2	cds
C08B11.3	13.006	20.1826	26.787	29.1682	34.5044	39.3342	34.2556	59.0702	42.3359	39.0732	CHROMOSOME_II	8022599	8027707	-	WBGene00007433	swsn-7	cds
C08B11.4	0	0	0	0	0	0	0	0	0	0.973458	CHROMOSOME_II	8028903	8032659	-	WBGene00003813	nrf-6	cds
C08B11.5	10.7352	10.0913	9.98049	12.2753	9.66423	10.9891	9.04151	11.5206	7.63163	10.0315	CHROMOSOME_II	8034293	8035717	-	WBGene00004723	sap-49	cds
C08B11.6	3.05264	5.59097	5.73139	8.2139	7.22647	7.67332	9.048	3.8402	6.19745	7.78427	CHROMOSOME_II	8035818	8037296	-	WBGene00007434	arp-6	cds
C08B11.7	15.7119	22.0238	19.2267	22.0375	22.6161	13.7897	10.4703	10.0535	22.3197	16.763	CHROMOSOME_II	8038219	8039545	-	WBGene00006724	ubh-4	cds
C08B11.8	3.73251	5.64229	5.89405	5.66005	5.17719	7.567	3.32955	3.8402	9.01379	7.0352	CHROMOSOME_II	8039954	8041685	+	WBGene00007435		cds
C08B11.9	14.6989	13.0231	11.0158	17.9121	19.9307	16.1215	14.2686	16.9141	8.11316	10.2525	CHROMOSOME_II	8037388	8038115	-	WBGene00007436		cds
C08B6.1	0	0	0	0	0	0	0	0	0	0	CHROMOSOME_V	10102566	10104921	-	WBGene00007422	ugt-17	cds
C08B6.10	0	0	0	0	0.140811	0	0	0	0	0	CHROMOSOME_V	10125027	10127512	+	WBGene00007430		cds
C08B6.11	0	0	0	0	0	0	0	0	0	0	CHROMOSOME_V	10107764	10109873	+	WBGene00007431		cds
C08B6.12	0	0	0	0	0	0	0	0	0	0	CHROMOSOME_V	10119549	10120961	-	WBGene00007432	srxa-18	cds
C08B6.13	0	0	0	0	0	0	0	0	0	0	CHROMOSOME_V	10121109	10122745	-	WBGene00044012	srxa-19	cds
C08B6.14	0	0	0	0	0	0	0	0	0	0	CHROMOSOME_V	10100131	10101991	-	WBGene00044044		cds
C08B6.2	0	0	0	0	0	0	0	0	0	0	CHROMOSOME_V	10105687	10106666	+	WBGene00007423		cds
C08B6.3	0	0	0	0	0	0	0	0	0	0	CHROMOSOME_V	10109373	10113440	-	WBGene00007424		cds
C08B6.4	0	0	0	0	0	0.140565	0	0	0	0	CHROMOSOME_V	10114740	10117311	+	WBGene00007425		cds
C08B6.5	0	0	0	0	0	0	0	0	0	0	CHROMOSOME_V	10117740	10119663	+	WBGene00007426		cds
C08B6.6	0	0	0	0	0	0	0	0	0	0	CHROMOSOME_V	10123613	10124729	+	WBGene00007427		cds
C08B6.7	19.7911	31.9532	32.0942	37.9149	47.5102	47.7789	51.8764	45.7376	38.2102	46.1809	CHROMOSOME_V	10130443	10134125	-	WBGene00007428	hpo-22	cds
C08B6.8	13.0196	6.67355	8.59708	8.84948	7.01275	5.59193	4.76159	8.50017	5.19278	6.88335	CHROMOSOME_V	10134618	10143065	+	WBGene00007429		cds
C08B6.9	22.9594	25.5603	26.7658	22.9812	23.9714	23.4488	28.5533	22.2638	19.5034	30.4639	CHROMOSOME_V	10127469	10130272	-	WBGene00000142	aos-1	cds
C08C3.1	0	0	0	0	0	0	0	0	0	0	CHROMOSOME_III	7814317	7816386	+	WBGene00001174	egl-5	cds
C08C3.2	4.97668	3.36243	5.69035	4.91014	7.99843	6.93267	7.61271	4.01262	5.70552	8.30897	CHROMOSOME_III	7774624	7775962	-	WBGene00015590	bath-15	cds
C08C3.3	0	0	0	0	0	0.140565	0	0	0	0	CHROMOSOME_III	7776842	7783389	-	WBGene00003102	mab-5	cds
C08C3.4	21.1509	26.8009	25.9144	19.6135	20.9364	15.6584	13.3214	11.8654	15.2216	14.5883	CHROMOSOME_III	7793378	7795344	-	WBGene00015591	cyk-7	cds
C08D8.1	0	0	0	0	0	0	0	0	0	0	CHROMOSOME_V	8345739	8349889	+	WBGene00015592		cds
C08D8.2	0	0	0	0.292593	0.140811	0	0.475186	0	1.42378	1.19784	CHROMOSOME_V	8336638	8340655	+	WBGene00006582	tmd-2	cds
C08E3.1	0	0	0	0	0	0	0	0	0	0	CHROMOSOME_II	1633812	1634095	+	WBGene00015593		cds
C08E3.10	0	0	0	0	0	0	0	0	0	0	CHROMOSOME_II	1619804	1621268	-	WBGene00015602	fbxa-158	cds
C08E3.11	0	0	0	0	0	0	0	0	0	0	CHROMOSOME_II	1621649	1622854	-	WBGene00015603	fbxa-159	cds
C08E3.12	0	0	0	0	0	0	0	0	0	0	CHROMOSOME_II	1623914	1624679	-	WBGene00015604	fbxa-160	cds
C08E3.13	0	0	0	0	0	0	0	0	0	0	CHROMOSOME_II	1632001	1633856	-	WBGene00015605		cds
C08E3.14	0	0	0	0	0	0	0	0	0	0	CHROMOSOME_II	1625973	1626890	+	WBGene00044415		cds
C08E3.15	0	0	0	0	0	0	0	0	0	0	CHROMOSOME_II	1627486	1627890	-	WBGene00044416		cds
C08E3.2	0	0	0	0	0	0	0	0	0	0	CHROMOSOME_II	1611338	1612517	+	WBGene00015594	btb-15	cds
C08E3.3	0	0	0	0	0	0	0	0	0	0	CHROMOSOME_II	1604673	1606150	-	WBGene00015595	bath-33	cds
C08E3.4	0	0	0	0	0	0	0	0	0	0	CHROMOSOME_II	1606597	1607591	-	WBGene00015596	fbxa-161	cds
C08E3.5	0	0	0	0	0	0	0	0	0	0	CHROMOSOME_II	1607999	1609008	-	WBGene00015597	fbxa-162	cds
C08E3.6	0	0	0	0	0	0	0	0	0	0	CHROMOSOME_II	1609262	1610722	-	WBGene00015598	fbxa-163	cds
C08E3.7	0	0	0	0	0	0	0	0	0	0	CHROMOSOME_II	1612795	1614066	-	WBGene00015599	fbxa-164	cds
C08E3.8	0	0	0	0	0	0	0	0	0	0	CHROMOSOME_II	1614800	1616470	-	WBGene00015600	fbxa-165	cds
C08E3.9	0	0	0	0	0	0	0	0	0	0	CHROMOSOME_II	1616919	1619011	-	WBGene00015601	fbxa-166	cds
C08E8.1	0	0	0	0	0	0	0	0	0	0	CHROMOSOME_V	18361007	18362515	-	WBGene00007437		cds
C08E8.10	0	0	0	0	0	0	0	0	0	0.224383	CHROMOSOME_V	18339092	18339879	-	WBGene00077692		cds
C08E8.11	0	0	0	0	0	0	0	0	0	0	CHROMOSOME_V	18350993	18352644	+	WBGene00119201		cds
C08E8.2	0	0	0	0	0	0	0	0	0	0	CHROMOSOME_V	18353482	18355814	-	WBGene00007438		cds
C08E8.3	0	0	0	0	0	0	0	0	0	0	CHROMOSOME_V	18350120	18350527	+	WBGene00007439		cds
C08E8.4	0	0	0	0	0	0	0	0	0	0	CHROMOSOME_V	18371818	18373503	+	WBGene00007440		cds
C08E8.5	0	0	0	0	0	0	0	0	0	0	CHROMOSOME_V	18359790	18359960	-	WBGene00007441		cds
C08E8.6	0	0	0	0	0	0	0	0	0	0	CHROMOSOME_V	18367986	18368394	-	WBGene00007442		cds
C08E8.9	0	0	0	0	0	0	0	0	0	0	CHROMOSOME_V	18364830	18365196	+	WBGene00050891		cds
C08F1.1	0	0	0	0	0	0	0	0	0	0	CHROMOSOME_II	1797858	1801383	+	WBGene00015606	math-2	cds
C08F1.10	0	0	0.162666	0.135641	0.106861	0.140565	0	0.733557	0	0.224383	CHROMOSOME_II	1785268	1786283	-	WBGene00015613		cds
C08F1.11	0	0	0.162666	0	0.106861	0	0	0	0.471125	0	CHROMOSOME_II	1783282	1784448	-	WBGene00044417		cds
C08F1.3	0	0	0	0	0	0	0	0	0	0	CHROMOSOME_II	1789187	1790223	+	WBGene00015607	fbxb-13	cds
C08F1.4	0	0	0	0	0	0	0	0	0	0	CHROMOSOME_II	1776316	1778532	+	WBGene00015608	math-3	cds
C08F1.5	0	0	0	0	0	0	0	0	0	0	CHROMOSOME_II	1778778	1782313	-	WBGene00015609	math-4	cds
C08F1.6	0	0.21732	0.325332	0.156952	0	0	0	0	0.481529	0	CHROMOSOME_II	1787221	1788193	-	WBGene00015610		cds
C08F1.8	0	0	0	0	0	0	0	0	0	0	CHROMOSOME_II	1804163	1808323	-	WBGene00015611		cds
C08F11.1	0	0	0	0	0	0	0	0	0	0	CHROMOSOME_IV	13623811	13625408	+	WBGene00007450		cds
C08F11.10	0	0	0	0	0	0	0	0	0	0	CHROMOSOME_IV	13648013	13649186	-	WBGene00007457		cds
C08F11.11	0	0	0	0	0	0	0	0	0	0	CHROMOSOME_IV	13646711	13647634	-	WBGene00007458		cds
C08F11.12	0	0	0	0	0	0	0	0	0	0	CHROMOSOME_IV	13650636	13651487	-	WBGene00007459		cds
C08F11.13	0	0	0	0	0	0	0	0	0	0	CHROMOSOME_IV	13607416	13609860	-	WBGene00007460		cds
C08F11.17	0	0	0	0	0	0	0	0	0	0	CHROMOSOME_IV	13649738	13650314	-	WBGene00045069		cds
C08F11.2	0	0	0	0	0	0	0	0	0	0	CHROMOSOME_IV	13622342	13623110	+	WBGene00007451		cds
C08F11.3	0	0	0	0	0	0	0	0	0	0	CHROMOSOME_IV	13619484	13621489	+	WBGene00007452		cds
C08F11.4	0	0	0	0	0	0	0	0	0	0	CHROMOSOME_IV	13626745	13632673	+	WBGene00005684	sru-21	cds
C08F11.5	0	0	0	0	0	0	0	0	0	0	CHROMOSOME_IV	13633415	13635196	+	WBGene00007453	fbxa-98	cds
C08F11.7	0	0.21732	0	0	0.106861	0	0	0	0	0	CHROMOSOME_IV	13637264	13638501	+	WBGene00007454		cds
C08F11.8	0	0	0	0	0	0	0	0	0	0	CHROMOSOME_IV	13639242	13644377	+	WBGene00007455	ugt-22	cds
C08F11.9	0	0	0	0	0	0	0	0	0	0	CHROMOSOME_IV	13644439	13645899	-	WBGene00007456	srz-29	cds
C08F8.1	38.7732	54.4197	38.8016	50.605	38.677	35.7301	20.4622	20.1932	19.4722	22.8281	CHROMOSOME_IV	11149833	11150911	+	WBGene00007443	pfd-1	cds
C08F8.15	0	0	0	0	0	0	0	0	0	0	CHROMOSOME_IV	11159549	11160786	-	WBGene00219217		cds
C08F8.2	3.73251	6.08095	3.96332	7.05131	5.9831	3.90874	4.27992	4.57376	6.65817	2.76852	CHROMOSOME_IV	11149168	11154314	+	WBGene00007444		cds
C08F8.3	6.10527	5.96626	8.43442	12.0389	21.0961	13.7933	10.4638	17.4314	14.2794	15.4133	CHROMOSOME_IV	11155008	11156674	+	WBGene00007445		cds
C08F8.4	0	0	0	0	0	0	0	0	0	0	CHROMOSOME_IV	11157128	11159471	-	WBGene00007446	mboa-4	cds
C08F8.5	0	0	0	0	0	0	0	0	0	0	CHROMOSOME_IV	11161760	11162530	-	WBGene00007447	fbxb-9	cds
C08F8.6	0	0	0	0	0	0	0	0	0	0	CHROMOSOME_IV	11162765	11164267	-	WBGene00007448		cds
C08F8.7	0	0	0.223481	0.156952	0	0	0	0	0	0	CHROMOSOME_IV	11177265	11178057	+	WBGene00004309	rap-3	cds
C08F8.8	0	0	0.162666	0	0.281622	0	0	0	0	0	CHROMOSOME_IV	11169813	11174764	+	WBGene00003657	nhr-67	cds
C08F8.9	11.2111	11.6166	8.25345	12.2811	7.12462	6.4389	4.28641	2.28688	0.952653	3.06883	CHROMOSOME_IV	11178057	11178576	-	WBGene00007449		cds
C08G5.1	0	0	0	0	0	0	0	0	0	0	CHROMOSOME_II	734657	738673	-	WBGene00015614		cds
C08G5.2	0	0	0	0	0	0	0	0	0	0	CHROMOSOME_II	739605	740906	-	WBGene00015615	fbxc-48	cds
C08G5.3	0	0	0	0	0	0	0	0	0	0	CHROMOSOME_II	743106	745135	-	WBGene00015616		cds
C08G5.4	0	0.21732	0	0	0	0.140565	0	0	0	0	CHROMOSOME_II	745469	750171	-	WBGene00004926	snt-6	cds
C08G5.6	0	0	0	0	0	0	0	0	0	0	CHROMOSOME_II	770560	772124	+	WBGene00015618		cds
C08G5.7	0	0	0	0	0	0	0	0	0	0.749075	CHROMOSOME_II	756201	765324	-	WBGene00044418		cds
C08G9.1	0	0	0	0	0	0	0	0	0.481529	0.224383	CHROMOSOME_IV	7658723	7664151	+	WBGene00015619		cds
C08G9.2	0	0	0	0	0	0	0	0	0	0.973458	CHROMOSOME_IV	7664166	7672961	-	WBGene00015620		cds
C08H9.1	0	0	0	0	0	0	0	0	0	0	CHROMOSOME_II	9875120	9877949	+	WBGene00007462		cds
C08H9.10	0	0	0	0	0	0	0	0	0	0	CHROMOSOME_II	9853752	9855636	-	WBGene00007469		cds
C08H9.11	0	0	0	0	0	0	0	0	0	0	CHROMOSOME_II	9858051	9859580	-	WBGene00007470		cds
C08H9.12	0	0	0	0	0	0	0	0	0	0	CHROMOSOME_II	9855812	9857803	-	WBGene00007471		cds
C08H9.13	0	0	0	0	0	0	0	0	0	0	CHROMOSOME_II	9869397	9871113	-	WBGene00007472		cds
C08H9.14	0	0	0	0	0	0	0	0	0	0	CHROMOSOME_II	9871549	9872927	-	WBGene00007473		cds
C08H9.15	0	0	0	0	0	0	0	0	0.471125	0	CHROMOSOME_II	9881134	9882473	+	WBGene00007474		cds
C08H9.16	3.38578	5.85961	8.29153	5.70267	4.71079	7.60842	8.09114	6.21329	4.73206	6.58643	CHROMOSOME_II	9892730	9894311	+	WBGene00086566		cds
C08H9.18	0	0	0	0	0	0	0	0	0	0	CHROMOSOME_II	9861850	9862166	-	WBGene00206395		cds
C08H9.2	11.3131	33.5297	46.0167	63.8163	55.5476	49.2116	60.9438	63.8587	67.1152	77.9356	CHROMOSOME_II	9886479	9891029	-	WBGene00007463		cds
C08H9.3	4.06565	6.78422	5.01991	7.25865	8.58559	6.62088	6.1839	5.30732	6.71019	2.31976	CHROMOSOME_II	9882669	9886383	-	WBGene00007464		cds
C08H9.4	0	0	0	0	0	0	0	0	0	0	CHROMOSOME_II	9862372	9866345	-	WBGene00007465		cds
C08H9.5	0	0	0	0	0	0	0	0	0	0	CHROMOSOME_II	9866589	9868677	-	WBGene00003862	old-1	cds
C08H9.6	0	0	0	0	0	0	0	0	0	0	CHROMOSOME_II	9873190	9874462	-	WBGene00007466		cds
C08H9.7	0	0	0	0.156952	0	0	0	0	0	0	CHROMOSOME_II	9859725	9861414	-	WBGene00007467		cds
C09B7.1	0	0	0	0	0	0.246884	0.475186	2.28688	1.41337	0.448767	CHROMOSOME_X	2673463	2682353	+	WBGene00004780	ser-7	cds
C09B7.2	0	0.21732	0.446961	1.05604	1.09755	3.59336	8.09114	6.12709	3.83142	5.38859	CHROMOSOME_X	2668129	2670584	+	WBGene00015621		cds
C09B8.1	0	0	0	0	0	0	0	0	0.952653	1.49815	CHROMOSOME_X	6031434	6034475	+	WBGene00002146	ipp-5	cds
C09B8.3	0	0	0	0	0	0	0	0	0	0	CHROMOSOME_X	6007168	6011275	-	WBGene00015622		cds
C09B8.4	0	0.21732	0.162666	0.899089	0.495345	2.39318	5.23353	6.2995	2.37643	2.1713	CHROMOSOME_X	6018446	6019901	-	WBGene00015623		cds
C09B8.5	0	0	0	0	0	0.140565	0.953616	3.66779	0.952653	2.31976	CHROMOSOME_X	6020831	6022458	-	WBGene00015624		cds
C09B8.6	0.564296	0	0	0	0.320584	0.246884	3.33279	1.55332	1.91571	1.19784	CHROMOSOME_X	6034057	6039461	-	WBGene00002023	hsp-25	cds
C09B8.7	0	0.21732	0.325332	0.313904	0.951727	3.91232	2.8576	6.47192	5.72632	4.93982	CHROMOSOME_X	6044274	6048575	-	WBGene00003911	pak-1	cds
C09B8.8	0	0	0	0	0	0.140565	0	0	0	0	CHROMOSOME_X	6015457	6017549	+	WBGene00015625		cds
C09B9.1	0	0	0	0	0	0	0	0	0	0	CHROMOSOME_IV	5037807	5040430	+	WBGene00015626		cds
C09B9.2	0	0	0	0	0	0	0	0	0	0	CHROMOSOME_IV	5029258	5031035	+	WBGene00015627		cds
C09B9.3	0	0	0	0	0	0	0	0	0	0	CHROMOSOME_IV	5021180	5029070	-	WBGene00015628		cds
C09B9.4	0	0	0	0	0	0	0	0	0	0	CHROMOSOME_IV	5031560	5033379	-	WBGene00015629		cds
C09B9.6	0	0	0	0	0	0	0	0	0	0	CHROMOSOME_IV	5055585	5056041	-	WBGene00003448	msp-55	cds
C09B9.7	0	0	0	0	0	0	0	0	0	0	CHROMOSOME_IV	5056965	5059843	-	WBGene00015630		cds
C09B9.8	0	0	0	0	0	0	0	0	0	0	CHROMOSOME_IV	5040918	5045388	-	WBGene00044484		cds
C09C7.1	0	0	0	0	0	0	0	0	0	0	CHROMOSOME_X	7925389	7926541	+	WBGene00006981	zig-4	cds
C09D1.1	0	0	0.487998	0.135641	0	0	0	0	0	0.448767	CHROMOSOME_I	4035746	4090963	+	WBGene00006820	unc-89	cds
C09D1.2	0	0	0	0	0	0	0	0	0	0	CHROMOSOME_I	4071801	4072850	-	WBGene00015631	clec-89	cds
C09D4.1	0	0	0	0	0	0.387449	0	0	0	0.224383	CHROMOSOME_I	5497781	5505388	+	WBGene00015632		cds
C09D4.2	0	0	0.162666	0	0	0	0	0	0	0.224383	CHROMOSOME_I	5491477	5493534	+	WBGene00015633		cds
C09D4.3	0	0	0	0	0	0	0	0	0	0	CHROMOSOME_I	5488343	5490629	+	WBGene00015634		cds
C09D4.4	16.8405	31.9572	19.5536	21.9678	23.7877	20.5276	20.9471	28.3485	28.0877	29.5664	CHROMOSOME_I	5479553	5484646	-	WBGene00015635		cds
C09D4.5	332.316	266.499	234.929	198.411	157.959	147.325	102.822	33.4819	26.9998	14.671	CHROMOSOME_I	5484770	5486357	-	WBGene00004431	rpl-19	cds
C09D4.6	0	0	0	0	0	0	0	0	0	0	CHROMOSOME_I	5486490	5487153	-	WBGene00015636		cds
C09D4.9	0.679874	0	0	0	0	0	0	0	0	0	CHROMOSOME_I	5487379	5488218	-	WBGene00206357		cds
C09D8.1	0.679874	0	0.325332	0	1.76264	5.84598	8.56308	7.5942	6.67898	3.89044	CHROMOSOME_II	10968326	11012173	+	WBGene00004215	ptp-3	cds
C09E10.2	0	0	0	0	0.281622	0	0	0	0	0	CHROMOSOME_X	984618	991232	-	WBGene00000958	dgk-1	cds
C09E7.1	0	0	0	0	0	0	0	0	0	0	CHROMOSOME_III	6532507	6533766	+	WBGene00015637	srxa-5	cds
C09E7.10	0	0	0	0	0	0	0	0	0	0	CHROMOSOME_III	6518661	6520003	-	WBGene00044295		cds
C09E7.2	0	0	0	0	0	0	0	0	0	0	CHROMOSOME_III	6528149	6532035	+	WBGene00004102	pqn-10	cds
C09E7.3	0	0	0	0	0	0	0	0	0	0	CHROMOSOME_III	6524049	6525607	-	WBGene00003859	oig-1	cds
C09E7.4	0.679874	0.651961	0	0.292593	0.985677	5.49278	6.19039	3.754	3.32908	3.14476	CHROMOSOME_III	6534414	6536942	-	WBGene00015638		cds
C09E7.5	0	0	0	0	0.106861	0	0	0	0	0	CHROMOSOME_III	6538048	6541259	-	WBGene00015639		cds
C09E7.6	0	0	0.386147	0.156952	0.140811	0	0	0	0	0	CHROMOSOME_III	6545287	6546351	-	WBGene00015640		cds
C09E7.7	1.92404	5.04566	6.13731	5.71621	8.17319	3.62761	2.8576	3.19286	0.481529	1.64661	CHROMOSOME_III	6546671	6551225	-	WBGene00015641		cds
C09E7.8	3.16821	2.16918	3.2108	4.38889	6.58029	4.2926	2.85436	3.8402	2.38684	3.96637	CHROMOSOME_III	6553522	6558522	-	WBGene00015642		cds
C09E7.9	1.12859	2.16918	1.76807	0.428233	0.990689	1.72461	0.953616	1.63953	0.481529	0.67315	CHROMOSOME_III	6541555	6545120	-	WBGene00015643		cds
C09E8.1	0	0	0	0	0	1.33716	1.90723	0	0.481529	0	CHROMOSOME_II	556484	564123	+	WBGene00015644		cds
C09E8.2	0	0	0	0	0	0	0	0	0	0	CHROMOSOME_II	553094	554785	+	WBGene00015645	lips-7	cds
C09E8.3	0	0	0	0	0.140811	0.493769	2.37917	2.28688	1.42378	2.39568	CHROMOSOME_II	546704	552025	+	WBGene00015646	mlt-10	cds
C09E8.4	0	0	0	0	0.743017	0.634333	0	0	0	0	CHROMOSOME_II	560620	566292	-	WBGene00206410		cds
C09E9.1	0.679874	2.06253	3.84169	3.67584	3.61324	7.14531	7.6192	6.21329	4.74246	5.91328	CHROMOSOME_IV	1275865	1277091	+	WBGene00007476		cds
C09F12.1	0	0	0	0	0	0	0	0	0	0	CHROMOSOME_X	11047349	11049166	+	WBGene00000522	clc-1	cds
C09F12.2	0	0	0	0	0	0	0	0	0	0	CHROMOSOME_X	11053878	11056904	+	WBGene00007482		cds
C09F12.3	0	0	0	0	0	0	0	0	0	0	CHROMOSOME_X	11040966	11042791	-	WBGene00007483		cds
C09F5.1	0	0.596626	0	0	1.68973	8.48605	5.23678	2.20067	10.4792	6.21359	CHROMOSOME_III	658706	662731	+	WBGene00015647		cds
C09F5.2	2.93706	2.3865	1.19948	1.98421	3.17577	4.43675	5.71196	1.55332	4.28174	6.73489	CHROMOSOME_III	647123	654460	+	WBGene00015648	orai-1	cds
C09F5.3	0	0	0	0	0	0	0	0	0	0	CHROMOSOME_III	662844	666261	-	WBGene00015649		cds
C09F9.1	0	0	0	0	0	0	0	0	0	0	CHROMOSOME_II	14698640	14699256	+	WBGene00007478		cds
C09F9.2	0	0	0	0	0	0	0	0	0	0	CHROMOSOME_II	14705441	14712525	+	WBGene00007479		cds
C09F9.3	0	0	0	0	0	0	0	0.733557	0	1.49815	CHROMOSOME_II	14720477	14733449	-	WBGene00007480	glna-1	cds
C09G1.1	0	0	0	0	0	0	0	0	0	0	CHROMOSOME_X	15966041	15972229	-	WBGene00004103	pqn-11	cds
C09G1.2	0	0	0	0	0	0	0	0	0	0	CHROMOSOME_X	15977691	15982529	-	WBGene00007484		cds
C09G1.3	0	0.379305	0	0	0	0	0	0	0.471125	0	CHROMOSOME_X	15986092	15987523	+	WBGene00007485		cds
C09G1.4	0	0.21732	0	0	0	0.140565	0	0	0.481529	0.224383	CHROMOSOME_X	15987901	15996865	-	WBGene00007486		cds
C09G1.5	0	0	0.162666	0	0	0.246884	0	0	0.94225	0.224383	CHROMOSOME_X	15959029	15962250	+	WBGene00007487		cds
C09G12.1	0	0	0	0	0	0	0	0	0	0	CHROMOSOME_IV	3502136	3503909	+	WBGene00015651	ceh-53	cds
C09G12.10	0	0	0	0	0	0	0	0	0	0	CHROMOSOME_IV	3504441	3506112	+	WBGene00023462	srz-83	cds
C09G12.11	0	0	0	0	0	0	0	0	0	0	CHROMOSOME_IV	3482892	3484703	+	WBGene00023463	srz-82	cds
C09G12.16	0	0	0	0	0	0	0	0	0	0	CHROMOSOME_IV	3480008	3481857	-	WBGene00023474	srz-37	cds
C09G12.17	0	0	0	0	0	0	0	0	0	0	CHROMOSOME_IV	3495293	3496437	-	WBGene00044470		cds
C09G12.2	0	0	0	0	0	0	0	0	0	0	CHROMOSOME_IV	3493607	3495176	+	WBGene00015652	srz-79	cds
C09G12.3	0	0	0	0	0	0	0	0	0	0	CHROMOSOME_IV	3491774	3493213	+	WBGene00015653	srz-78	cds
C09G12.5	0	0	0	0	0	0	0	0	0	0	CHROMOSOME_IV	3479332	3479727	+	WBGene00015655		cds
C09G12.6	0	0	0	0	0	0	0	0	0	0	CHROMOSOME_IV	3477389	3479008	-	WBGene00015656	srz-70	cds
C09G12.8	2.48834	5.69762	5.26465	4.43928	5.73543	6.9705	5.24327	3.92641	7.62123	10.7046	CHROMOSOME_IV	3506401	3509526	-	WBGene00000424	ced-10	cds
C09G12.9	0	0	0.223481	0.135641	0	0	0	0	0	0	CHROMOSOME_IV	3510471	3514559	-	WBGene00015658	tsg-101	cds
C09G4.1	2.03962	5.26298	3.84169	6.05343	5.74545	5.38646	3.80473	6.2995	1.8949	2.99291	CHROMOSOME_IV	8540541	8544366	+	WBGene00002043	hyl-1	cds
C09G4.2	1.80847	0	0.487998	1.44165	1.49105	1.16235	8.56957	5.39353	8.11316	5.39198	CHROMOSOME_IV	8520881	8538160	+	WBGene00015650	pkg-2	cds
C09G4.3	24.2035	28.476	35.9922	36.1478	47.5542	49.963	52.8105	64.2474	68.2031	75.6057	CHROMOSOME_IV	8513906	8514711	+	WBGene00001051	cks-1	cds
C09G4.4	11.1975	16.4962	16.0357	15.0365	26.2544	22.8181	19.5183	16.6555	14.7401	13.3939	CHROMOSOME_IV	8513192	8513907	+	WBGene00044001		cds
C09G4.5	0	0	0	0.156952	0	0	0	0	0	0	CHROMOSOME_IV	8511271	8513463	+	WBGene00003224	mes-6	cds
C09G5.1	0	0	0	0	0	0	0	0	0	0	CHROMOSOME_II	10694995	10702465	+	WBGene00001586	ggr-1	cds
C09G5.13	0	0	0	0	0	0	0	0	0	0	CHROMOSOME_II	10717277	10719568	+	WBGene00206538		cds
C09G5.2	15.8275	15.8996	14.856	16.0791	11.0774	11.0883	9.03826	19.5459	10.9711	9.95218	CHROMOSOME_II	10702174	10714240	-	WBGene00007488	dph-2	cds
C09G5.3	0	0	0	0	0	0	0	0	0	0	CHROMOSOME_II	10703559	10704515	+	WBGene00000655	col-79	cds
C09G5.4	0	0	0	0	0	0	0	0	0	0	CHROMOSOME_II	10704844	10705961	+	WBGene00000616	col-39	cds
C09G5.5	0	0.21732	0.162666	0.271281	0	0	0	0	0	0	CHROMOSOME_II	10707144	10708227	+	WBGene00000656	col-80	cds
C09G5.6	0	0	0	0	0	0	0	0	0	0	CHROMOSOME_II	10708901	10712066	+	WBGene00000251	bli-1	cds
C09G5.7	0	0	0	0	0.140811	0.387449	0.950372	0	0	0	CHROMOSOME_II	10714854	10716395	+	WBGene00007489		cds
C09G5.8	0	0	0	0	0	0	0	0	0	0	CHROMOSOME_II	10720172	10729193	+	WBGene00007490	mks-5	cds
C09G9.1	5.98969	8.35276	8.27323	8.40771	13.5352	9.64123	10.4736	7.76662	20.4768	9.13057	CHROMOSOME_IV	8862596	8865477	-	WBGene00007492		cds
C09G9.2	9.60663	11.7192	16.7685	14.3874	17.2113	14.2906	11.8991	20.2794	17.6397	16.7664	CHROMOSOME_IV	8868024	8869668	-	WBGene00007493		cds
C09G9.3	0	0	0	0	0	0	0	0	0	0	CHROMOSOME_IV	8869949	8873044	-	WBGene00007494		cds
C09G9.4	0	0	0	0	0	0	0	0	0	0	CHROMOSOME_IV	8874134	8876963	+	WBGene00006409	tag-19	cds
C09G9.5	0	0	0	0	0	0	0	0	0	0	CHROMOSOME_IV	8886513	8888589	+	WBGene00007495		cds
C09G9.6	17.0852	39.8592	48.6772	56.5829	80.8754	83.9235	85.6794	99.2403	116.84	112.894	CHROMOSOME_IV	8888960	8890843	+	WBGene00003864	oma-1	cds
C09G9.7	0	0	0	0	0	0	0	0	0	0	CHROMOSOME_IV	8877516	8879880	-	WBGene00007496	npax-4	cds
C09G9.8	0	0	0	0	0	0	0	0	0	0	CHROMOSOME_IV	8881461	8882402	+	WBGene00007497		cds
C09H10.1	0	0	0	0	0	0	0	0	0	0	CHROMOSOME_II	11092691	11093796	+	WBGene00004455	rpl-42	cds
C09H10.10	6.10527	7.16353	10.2025	7.57256	9.06203	7.88596	2.8576	3.754	3.80021	10.2559	CHROMOSOME_II	11094987	11096417	-	WBGene00007504		cds
C09H10.2	253.09	205.928	198.791	177.034	121.501	110.079	84.3253	32.8345	16.0911	8.45742	CHROMOSOME_II	11096509	11097148	-	WBGene00004454	rpl-41	cds
C09H10.3	20.3554	24.8611	23.7418	19.3402	17.9832	15.4259	14.2718	11.0457	15.232	17.9642	CHROMOSOME_II	11097783	11100087	+	WBGene00003831	nuo-1	cds
C09H10.4	0.679874	0	0.162666	0	0	0.140565	0	0	0	0	CHROMOSOME_II	11100083	11100404	+	WBGene00043120		cds
C09H10.5	0.679874	0	0	0	0	0	0	0	0	0	CHROMOSOME_II	11100914	11103699	-	WBGene00007499		cds
C09H10.6	12.7612	14.8643	18.494	17.5072	18.8621	19.331	20.4589	17.0003	16.7078	21.2541	CHROMOSOME_II	11106558	11108119	+	WBGene00007500	nasp-1	cds
C09H10.7	0	0.379305	0.223481	0.313904	0.106861	0	0.475186	0	0	0	CHROMOSOME_II	11108101	11109525	+	WBGene00007501	apc-17	cds
C09H10.8	0	0	0	0	0	0	0	0	0	0	CHROMOSOME_II	11109526	11111111	-	WBGene00007502	glb-4	cds
C09H10.9	0	0	0	0	0	0	0	0	0	0	CHROMOSOME_II	11104404	11105988	+	WBGene00007503		cds
C09H5.1	0	0	0	0	0	0	0	0	0	0	CHROMOSOME_V	8082347	8082747	+	WBGene00015659		cds
C09H5.2	0.679874	0	0	0	0	0	0	0	0	0	CHROMOSOME_V	8076065	8079894	+	WBGene00015660	catp-3	cds
C09H5.3	0	0	0	0	0	0	0	0	0	0	CHROMOSOME_V	8065760	8067880	-	WBGene00006188	str-140	cds
C09H5.4	0	0	0	0	0	0	0	0	0	0	CHROMOSOME_V	8068132	8069709	-	WBGene00006190	str-143	cds
C09H5.5	0	0	0	0	0	0	0	0	0	0	CHROMOSOME_V	8070623	8072124	-	WBGene00006191	str-144	cds
C09H5.6	0	0	0	0	0	0	0	0	0	0	CHROMOSOME_V	8080347	8081658	-	WBGene00006180	str-131	cds
C09H5.7	0	0	0	0	0	0	0	0	0	0	CHROMOSOME_V	8084100	8085221	-	WBGene00015661		cds
C09H5.9	0	0	0	0	0	0	0	0	0	0	CHROMOSOME_V	8089299	8090675	-	WBGene00006179	str-130	cds
C09H6.1	2.25718	3.52844	9.02427	10.4481	10.9805	14.1194	13.7999	18.0364	17.6917	7.78427	CHROMOSOME_I	8103596	8109222	+	WBGene00005009	spr-4	cds
C09H6.2	0	0	0.874145	0.156952	0.140811	1.02178	0.475186	3.19286	0.94225	1.79507	CHROMOSOME_I	8109738	8119309	-	WBGene00002999	lin-10	cds
C09H6.3	5.32342	8.95341	7.52072	9.57031	9.12993	9.15463	3.81122	6.38571	7.60042	8.00526	CHROMOSOME_I	8125794	8130081	+	WBGene00003136	mau-2	cds
C10A4.1	0	0	0	0	0	0.915463	0.953616	0	0	0.224383	CHROMOSOME_X	7415794	7418582	+	WBGene00015662		cds
C10A4.10	0	0	0	0	0	0	0	0	0	0	CHROMOSOME_X	7398922	7400812	+	WBGene00050957		cds
C10A4.13	0	0	0	0	0	0	0	0	0	0	CHROMOSOME_X	7397600	7397989	-	WBGene00206485		cds
C10A4.2	0	0	0	0	0	0	0	0	0	0	CHROMOSOME_X	7412450	7412704	+	WBGene00015663		cds
C10A4.3	0.564296	0	0	0	0	0	0	0	0	0	CHROMOSOME_X	7407410	7408736	+	WBGene00015664		cds
C10A4.4	0	0	0	0	0	0	0	0	0	0	CHROMOSOME_X	7402085	7403567	+	WBGene00015665		cds
C10A4.5	0	0	0	0	0.106861	0	0.950372	0.733557	0	0.224383	CHROMOSOME_X	7393871	7395941	+	WBGene00015666	gad-2	cds
C10A4.6	0	0	0	0	0.106861	0	0.953616	0	0.963057	0.224383	CHROMOSOME_X	7390528	7392230	+	WBGene00015667		cds
C10A4.7	0	0	0	0	0	0	0.953616	0	0	0	CHROMOSOME_X	7413566	7415475	-	WBGene00015668		cds
C10A4.8	0	0	0.162666	0.313904	0.140811	0	0	0	0	0	CHROMOSOME_X	7422628	7424836	-	WBGene00003380	mnm-2	cds
C10A4.9	0	0	0	0	0	0	0	0	0	0	CHROMOSOME_X	7420855	7421892	+	WBGene00045456		cds
C10B5.1	3.16821	4.17638	3.6988	2.99763	2.79731	1.26508	2.85436	0.733557	2.85796	2.92037	CHROMOSOME_V	8581239	8583555	+	WBGene00015670		cds
C10B5.3	0	0	0	0	0	0	0	0	0	0	CHROMOSOME_V	8583532	8584510	-	WBGene00015671		cds
C10C5.1	0	0.21732	0	0	0.106861	0	0	0	0	0	CHROMOSOME_IV	9359424	9366489	-	WBGene00007505		cds
C10C5.2	0	0	0	0	0	0	0	0	0	0	CHROMOSOME_IV	9371491	9373619	+	WBGene00007506		cds
C10C5.3	0	0	0.162666	0	0	0	0	0	0	0	CHROMOSOME_IV	9374748	9376475	+	WBGene00007507		cds
C10C5.4	0	0	0	0	0	0	0	0	0	0	CHROMOSOME_IV	9378586	9380433	+	WBGene00007508		cds
C10C5.5	0	0	0	0	0	0	0	0	0	0	CHROMOSOME_IV	9381404	9383098	+	WBGene00007509		cds
C10C5.6	11.6462	16.2789	16.5648	16.9142	20.2563	22.0468	19.0366	28.952	24.3603	20.1355	CHROMOSOME_IV	9386191	9394905	+	WBGene00000911	daf-15	cds
C10C5.7	0	0	0	0	0	0	0	0	0	0	CHROMOSOME_IV	9385107	9385602	+	WBGene00007511		cds
C10C6.1	12.2105	31.6805	32.4166	35.6421	34.3396	36.5843	49.5037	56.741	46.6384	45.5871	CHROMOSOME_IV	11425720	11447043	+	WBGene00002192	kin-4	cds
C10C6.2	0	0	0	0	0	0	0	0	0	0	CHROMOSOME_IV	11459970	11463173	+	WBGene00007006	npr-3	cds
C10C6.3	0	0	0	0	0	0	0	0	0	0	CHROMOSOME_IV	11463515	11465204	-	WBGene00007512		cds
C10C6.5	4.18123	5.15633	6.93087	7.47954	10.577	6.29834	4.27667	6.12709	9.56815	8.75773	CHROMOSOME_IV	11470163	11473395	+	WBGene00007513	wht-2	cds
C10C6.6	8.02932	10.5773	16.5845	11.1902	10.8347	16.5811	17.1456	17.3891	17.231	14.2189	CHROMOSOME_IV	11473345	11479231	-	WBGene00007514		cds
C10C6.7	0	0.379305	0	0.292593	0.529294	0.281129	0	0	0.481529	0	CHROMOSOME_IV	11465407	11467331	-	WBGene00007515		cds
C10E2.1	0	0	0	0	0	0	0	0	0	0	CHROMOSOME_X	16763636	16766583	+	WBGene00015672		cds
C10E2.2	0	0	0	0	0	0	0	0.733557	0.481529	0.749075	CHROMOSOME_X	16745666	16748135	+	WBGene00015673		cds
C10E2.3	0	0	0	0	0	0	0	0	0	0	CHROMOSOME_X	16729486	16743726	+	WBGene00001837	hda-4	cds
C10E2.4	0	0	0	0	0	0	0	0.733557	0	0.224383	CHROMOSOME_X	16749682	16751037	-	WBGene00015674		cds
C10E2.5	0	0	0	0	0	0	0	0	0	0	CHROMOSOME_X	16751791	16753600	-	WBGene00015675		cds
C10E2.6	1.12859	0	0.325332	0.877778	0.951727	5.24948	16.6575	26.1902	18.5923	10.6287	CHROMOSOME_X	16767365	16770427	-	WBGene00015676		cds
C10F3.1	2.25718	10.0873	13.5151	15.2652	23.8155	22.4955	22.3694	25.5005	23.3972	18.0334	CHROMOSOME_V	5996340	5999329	+	WBGene00015677	cpg-4	cds
C10F3.2	0	0	0	0	0	0	0	0	0	0	CHROMOSOME_V	5983728	5985494	+	WBGene00000979	dhs-16	cds
C10F3.3	0	0	0	0	0	0	0	0	0	0	CHROMOSOME_V	5976012	5981496	+	WBGene00000069	acy-2	cds
C10F3.4	0	0	0	0	0	0.528014	0	0	0.481529	0	CHROMOSOME_V	5961796	5969137	+	WBGene00015678	mcp-1	cds
C10F3.5	0.679874	0	0.162666	0	0.422433	1.93725	2.37917	1.55332	1.91571	1.3463	CHROMOSOME_V	5960567	5963820	-	WBGene00003954	pcm-1	cds
C10F3.6	0	0	0	0	0	0	0	0	0	0	CHROMOSOME_V	5986950	5990235	-	WBGene00001508	fut-8	cds
C10F3.7	0	0	0	0	0	0	0	0	0	0	CHROMOSOME_V	5985423	5986837	-	WBGene00015679		cds
C10G11.1	0	0	0	0	0	0	0	0	0	0	CHROMOSOME_I	6307329	6308600	+	WBGene00015685		cds
C10G11.10	0	0	0	0	0	0	0	0	0	0	CHROMOSOME_I	6305028	6306382	-	WBGene00015690		cds
C10G11.2	0	0	0	0	0	0	0	0	0	0	CHROMOSOME_I	6302476	6304265	+	WBGene00005273	srh-50	cds
C10G11.3	0	0	0	0	0	0	0	0	0	0	CHROMOSOME_I	6300495	6302300	+	WBGene00005274	srh-51	cds
C10G11.4	0	0	0	0	0	0	0	0	0	0	CHROMOSOME_I	6297769	6299731	+	WBGene00005272	srh-49	cds
C10G11.5	8.94035	10.526	12.0328	11.7541	14.0016	11.1568	6.18715	13.9799	13.2955	13.0969	CHROMOSOME_I	6294898	6297638	+	WBGene00004068	pnk-1	cds
C10G11.6	0	0	0	0	0	0.140565	0	0	0	0	CHROMOSOME_I	6289433	6293857	+	WBGene00015686		cds
C10G11.7	23.8704	20.8859	29.3501	26.0563	40.7502	41.4626	46.1676	59.1987	53.8301	50.9689	CHROMOSOME_I	6284973	6289342	+	WBGene00015687		cds
C10G11.8	0	0	0	0	0	0	0	0	0	0	CHROMOSOME_I	6271983	6273770	-	WBGene00015688		cds
C10G11.9	0	0	0	0	0	0	0	0	0	0	CHROMOSOME_I	6274577	6275270	-	WBGene00015689		cds
C10G6.1	0	0	0.162666	0	0.106861	0.634333	1.4288	3.8402	1.42378	1.3463	CHROMOSOME_IV	5820359	5830189	+	WBGene00015680	egal-1	cds
C10G8.1	0	0	0	0	0	0	0	0	0	0	CHROMOSOME_V	5331251	5333039	+	WBGene00005183	srg-26	cds
C10G8.2	0	0	0	0	0	0	0	0	0	0	CHROMOSOME_V	5314388	5315573	+	WBGene00015681		cds
C10G8.3	0	0	0	0	0	0	0	0	0	0	CHROMOSOME_V	5312874	5314273	+	WBGene00015682		cds
C10G8.4	0	0	0.325332	0	0	0	0	0	0	0	CHROMOSOME_V	5311919	5312300	+	WBGene00015683		cds
C10G8.5	0.564296	0	0.162666	0.135641	0.140811	0.246884	0	0	0	0	CHROMOSOME_V	5303671	5311230	+	WBGene00003567	ncx-2	cds
C10G8.6	0	0	0	0	0	0	0	0	0	0	CHROMOSOME_V	5315497	5319561	-	WBGene00000455	ceh-34	cds
C10G8.7	0	0	0	0	0	0	0	0	0	0	CHROMOSOME_V	5323188	5324600	-	WBGene00000454	ceh-33	cds
C10G8.8	1.35975	0.379305	0	0	0	1.79668	0.475186	5.56595	1.90531	3.22068	CHROMOSOME_V	5324782	5328454	-	WBGene00015684		cds
C10H11.1	3.16821	4.06973	4.00436	3.94712	8.40582	11.7712	8.56308	12.3404	10.5104	7.11112	CHROMOSOME_I	4747628	4759602	+	WBGene00015691	viln-1	cds
C10H11.10	22.8574	28.966	53.7748	68.1723	87.4445	86.5294	60.0032	66.2757	51.852	33.9056	CHROMOSOME_I	4759818	4761324	-	WBGene00015698	kca-1	cds
C10H11.3	0	0	0	0	0	0	0	0	0	0	CHROMOSOME_I	4731605	4735280	+	WBGene00015692	ugt-25	cds
C10H11.4	0.679874	0	0	0	0.704055	1.97149	5.24002	0	0.952653	0.897533	CHROMOSOME_I	4727302	4730367	+	WBGene00015693	ugt-28	cds
C10H11.5	0	0	0	0	0	0	0	0	0	0	CHROMOSOME_I	4724066	4726780	+	WBGene00015694	ugt-27	cds
C10H11.6	0	0	0	0.135641	0	0	0	0.819766	0	0	CHROMOSOME_I	4721179	4723961	+	WBGene00015695	ugt-26	cds
C10H11.7	0	0	0	0	0	0	0	0	0	0	CHROMOSOME_I	4719790	4721099	+	WBGene00015696		cds
C10H11.8	0.564296	0	0	0	0.354534	0	0	0	0	0	CHROMOSOME_I	4735757	4738101	-	WBGene00015697		cds
C10H11.9	15.7255	23.9364	23.6583	25.8625	27.3319	18.7994	27.1407	33.0947	22.455	18.1886	CHROMOSOME_I	4738251	4744322	-	WBGene00002694	let-502	cds
C11D2.1	0	0	0	0	0	0	0	0	0	0	CHROMOSOME_IV	6191275	6191538	+	WBGene00015699		cds
C11D2.2	0	0	0	0	0	0	0	0	0	0	CHROMOSOME_IV	6185877	6189194	+	WBGene00015700		cds
C11D2.3	0.679874	0	0.162666	0	0.388483	0	0	0.819766	0.471125	0	CHROMOSOME_IV	6154095	6154612	+	WBGene00015701		cds
C11D2.4	11.3131	10.2533	14.3512	15.3447	16.8807	14.8186	16.1855	12.599	13.3267	18.7858	CHROMOSOME_IV	6155482	6156895	-	WBGene00015702		cds
C11D2.6	0	0	0	0	0	0	0	0	0	0	CHROMOSOME_IV	6157299	6173029	-	WBGene00006809	unc-77	cds
C11D2.7	8.94035	14.813	10.3666	14.1588	10.8297	9.08614	6.1839	4.65997	3.81061	6.95927	CHROMOSOME_IV	6154546	6155390	-	WBGene00015703		cds
C11D9.1	0	0	0	0	0	0.702824	0.950372	0	0.481529	0	CHROMOSOME_I	4422033	4426177	+	WBGene00015704	cgef-2	cds
C11E4.1	0	0	0	0	0	0	0	0	0	0	CHROMOSOME_X	9584607	9586433	+	WBGene00007516		cds
C11E4.2	0	0	0	0	0	0	0	0	0	0	CHROMOSOME_X	9587885	9588822	+	WBGene00007517		cds
C11E4.3	0	0	0	0	0	0	0	0	0	0	CHROMOSOME_X	9589366	9595433	+	WBGene00007518	tag-263	cds
C11E4.6	0	0	0	0	0	0.740653	1.4288	0	0	0.973458	CHROMOSOME_X	9610504	9616967	+	WBGene00007520		cds
C11E4.7	0	0	0	0	0	0	0	0	0	0	CHROMOSOME_X	9617190	9619036	+	WBGene00007521		cds
C11E4.8	0	0	0	0	0	0	0	0	0	0	CHROMOSOME_X	9623247	9624657	+	WBGene00007522		cds
C11G10.1	0	0	0	0	0	0	0	0	0	0	CHROMOSOME_X	15157288	15158547	-	WBGene00007525		cds
C11G10.2	0	0	0	0	0	0	0	0	0	0	CHROMOSOME_X	15141935	15142334	-	WBGene00007526		cds
C11G6.1	0.564296	0.379305	0.325332	0.313904	1.97135	5.99013	4.7551	9.23373	6.68938	7.8602	CHROMOSOME_X	16332368	16345951	+	WBGene00006384	taf-3	cds
C11G6.2	0	0	0	0	0	0	0	0	0	0	CHROMOSOME_X	16329145	16329925	+	WBGene00007523		cds
C11G6.4	0	0	0	0	0	0	0.953616	0	0.481529	0.224383	CHROMOSOME_X	16354904	16359582	+	WBGene00003624	nhr-28	cds
C11H1.2	0	0	0	0	0.140811	0.949708	1.90723	1.63953	0.94225	1.42222	CHROMOSOME_X	14304864	14307697	-	WBGene00007528		cds
C11H1.3	0	0	0	0	0.388483	1.79668	3.80798	6.94685	2.40764	3.36575	CHROMOSOME_X	14307793	14311613	-	WBGene00007529		cds
C11H1.4	0	0	0	0	0	0	0	0	0	0.224383	CHROMOSOME_X	14313651	14326730	+	WBGene00004191	prx-1	cds
C11H1.5	0	0	0	0	0	0	0	0	0	0	CHROMOSOME_X	14298021	14303070	-	WBGene00007530		cds
C11H1.7	0	0.21732	0	0	0	0.493769	0.475186	0	0	0	CHROMOSOME_X	14327548	14330125	+	WBGene00007531		cds
C11H1.8	0	0	0	0	0.281622	1.05603	1.90723	0	0	0	CHROMOSOME_X	14295752	14296586	-	WBGene00007532		cds
C11H1.9	0	0	0	0	0	0	0	0	0	1.94692	CHROMOSOME_X	14318063	14320328	-	WBGene00023500		cds
C12C8.1	0	0	0	0.156952	0	0.493769	0.475186	0	0	0.224383	CHROMOSOME_I	9320353	9322503	-	WBGene00002026	hsp-70	cds
C12C8.2	0	0	0	0	0	0	0	0	0	0	CHROMOSOME_I	9327849	9330922	+	WBGene00007533	cbl-1	cds
C12C8.3	0	0	0.162666	0.156952	0.92279	0.281129	0	0	0.471125	0	CHROMOSOME_I	9335764	9342488	-	WBGene00003026	lin-41	cds
C12D12.1	0	0	0	0	0	0	0.953616	0	0	0	CHROMOSOME_X	3499240	3505240	+	WBGene00015713		cds
C12D12.2	0	0	0	0.271281	0.427445	0.140565	0.953616	0	0	0.224383	CHROMOSOME_X	3496013	3499156	+	WBGene00001620	glt-1	cds
C12D12.3	0	0	0	0	0	0	0	0	0	0	CHROMOSOME_X	3489280	3491142	+	WBGene00015714		cds
C12D12.4	0	0	0	0	0	0	0	0	0	0	CHROMOSOME_X	3486296	3486825	-	WBGene00015715		cds
C12D12.5	0	0	0	0	0	0	1.4288	0	0	0	CHROMOSOME_X	3505427	3506378	-	WBGene00015716	sox-4	cds
C12D5.10	0	0	0	0	0	0	0	0	0	0	CHROMOSOME_V	7692072	7693469	-	WBGene00015711		cds
C12D5.11	0	0	0	0	0	0	0	0	0	0	CHROMOSOME_V	7681801	7683938	-	WBGene00015712	sre-11	cds
C12D5.2	0	0	0	0	0	0	0	0	0	0	CHROMOSOME_V	7686363	7688140	+	WBGene00015705	nhr-152	cds
C12D5.3	0	0	0	0	0	0	0	0	0	0	CHROMOSOME_V	7676185	7676944	+	WBGene00015706		cds
C12D5.4	0	0	0	0	0	0	0	0	0	0	CHROMOSOME_V	7672070	7673027	+	WBGene00015707		cds
C12D5.5	0	0	0	0	0	0	0	0	0	0	CHROMOSOME_V	7668221	7668967	+	WBGene00015708		cds
C12D5.7	0	0	0	0	0	0.246884	0	0	0	0	CHROMOSOME_V	7679302	7681518	-	WBGene00015709	cyp-33A1	cds
C12D5.8	0	0	0	0	0	0	0	0	0	0	CHROMOSOME_V	7684321	7686316	-	WBGene00003684	nhr-94	cds
C12D5.9	0	0	0	0	0	0	0	0	0	0	CHROMOSOME_V	7688314	7689957	-	WBGene00015710		cds
C12D8.1	13.8015	16.6582	18.6369	20.3323	27.6185	29.466	25.227	17.9063	19.9537	21.9306	CHROMOSOME_V	10236133	10238836	-	WBGene00007534		cds
C12D8.10	16.2762	30.1512	35.6288	39.0409	53.844	54.0322	51.8764	80.1255	50.8889	61.4492	CHROMOSOME_V	10248880	10252870	+	WBGene00000102	akt-1	cds
C12D8.11	5.65656	14.1611	9.5533	14.1665	10.1985	5.8424	11.9056	10.8733	12.8348	6.43458	CHROMOSOME_V	10252797	10255032	-	WBGene00004405	rop-1	cds
C12D8.12	0	0	0	0	0	0	0	0	0	0	CHROMOSOME_V	10231682	10233404	-	WBGene00006226	str-182	cds
C12D8.13	0	0	0	0	0	0	0	0	0	0	CHROMOSOME_V	10219429	10220444	-	WBGene00007540		cds
C12D8.14	0	0	0	0	0	0	0	0	0	0	CHROMOSOME_V	10228026	10228379	-	WBGene00007541	fipr-4	cds
C12D8.15	0	0	0	0	0	0	0	0	0	0	CHROMOSOME_V	10228691	10229215	-	WBGene00007542		cds
C12D8.16	0	0	0	0	0	0	0	0	0	0	CHROMOSOME_V	10229786	10230108	+	WBGene00007543	fipr-7	cds
C12D8.17	0	0	0	0	0	0	0	0	0	0	CHROMOSOME_V	10231242	10231510	+	WBGene00007544	fipr-6	cds
C12D8.18	0	0	0.223481	0	0	0	0	0	0	0	CHROMOSOME_V	10221011	10221391	-	WBGene00044174	fipr-5	cds
C12D8.19	0	0	0	0	0	0	0	0	0	0	CHROMOSOME_V	10221636	10221937	+	WBGene00044175	fipr-9	cds
C12D8.20	0	0	0	0	0	0	0	0	0	0	CHROMOSOME_V	10222281	10223495	+	WBGene00194780		cds
C12D8.21	0	0	0	0	0	0	0	0	0	0	CHROMOSOME_V	10240548	10241163	-	WBGene00195157		cds
C12D8.4	0	0	0	0	0	0	0	0	0	0	CHROMOSOME_V	10226859	10227408	-	WBGene00007535	ttr-19	cds
C12D8.5	0	0	0	0	0	0	0	0	0	0	CHROMOSOME_V	10223421	10225696	-	WBGene00007536	daf-36	cds
C12D8.6	0	0	0	0	0	0	0	0	0	0	CHROMOSOME_V	10239621	10240160	-	WBGene00007537	fipr-8	cds
C12D8.8	0	0	0	0	0	0	0	0	0	0	CHROMOSOME_V	10241759	10242693	+	WBGene00000721	col-148	cds
C12D8.9	0	0	0	0	0	0	0	0	0	0	CHROMOSOME_V	10242830	10243153	-	WBGene00007538		cds
C13A10.1	0	0	0	0	0	0.387449	0	0	0	0	CHROMOSOME_II	1350692	1355645	-	WBGene00015728		cds
C13A10.2	0	0	0	0	0	0.246884	0	0	0.471125	0	CHROMOSOME_II	1357184	1358014	-	WBGene00015729		cds
C13A2.1	0	0	0	0	0	0	0	0	0	0	CHROMOSOME_V	7289009	7291813	+	WBGene00015718		cds
C13A2.10	0	0	0	0	0	0	0	0	0	0	CHROMOSOME_V	7273813	7275069	-	WBGene00015726		cds
C13A2.11	0	0	0	0	0	0	0	0	0	0	CHROMOSOME_V	7280857	7281954	-	WBGene00015727		cds
C13A2.12	0	0	0	0	0	0	0	0	0	0	CHROMOSOME_V	7258790	7260139	+	WBGene00044547		cds
C13A2.2	0	0	0	0	0	0	0	0	0	0	CHROMOSOME_V	7286167	7287381	+	WBGene00015719		cds
C13A2.3	0	0	0	0	0	0	0	0	0	0	CHROMOSOME_V	7282336	7284738	+	WBGene00015720		cds
C13A2.4	0	0	0	0	0	0	0	0	0	0	CHROMOSOME_V	7279292	7280512	+	WBGene00015721		cds
C13A2.5	0	0	0	0	0	0	0	0	0	0	CHROMOSOME_V	7275773	7278506	+	WBGene00015722		cds
C13A2.6	0	0	0	0	0	0	0	0	0	0	CHROMOSOME_V	7269713	7272769	+	WBGene00015723		cds
C13A2.7	0	0	0	0	0	0	0	0	0	0	CHROMOSOME_V	7266335	7268788	+	WBGene00015724		cds
C13A2.9	0	0	0	0	0	0	0	0	0	0	CHROMOSOME_V	7262547	7264028	-	WBGene00015725		cds
C13B4.1	4.06565	4.17638	9.89841	7.54347	12.0052	13.413	8.09114	6.94685	9.52653	9.20311	CHROMOSOME_II	14470297	14479551	-	WBGene00007545		cds
C13B4.2	36.7472	24.9124	31.7872	39.5175	47.69	43.9621	48.5663	45.6075	47.6223	56.0742	CHROMOSOME_II	14485549	14488615	-	WBGene00006856	usp-14	cds
C13B7.1	0	0	0	0	0	0	0	0	0	0	CHROMOSOME_V	2435724	2437783	+	WBGene00015730	srt-1	cds
C13B7.2	0	0	0	0	0	0	0	0	0	0	CHROMOSOME_V	2431804	2434724	+	WBGene00006171	str-120	cds
C13B7.3	0	0	0	0	0	0	0	0	0	0	CHROMOSOME_V	2419080	2421582	+	WBGene00005137	srd-60	cds
C13B7.4	0	0	0	0	0.106861	0	0	0	0	0	CHROMOSOME_V	2423286	2426205	-	WBGene00005148	srd-71	cds
C13B7.5	0	0	0	0	0	0	0	0	0	0	CHROMOSOME_V	2426478	2428123	-	WBGene00006170	str-119	cds
C13B7.6	0.564296	0.21732	0.386147	0.156952	0	0.246884	0	0	0	0	CHROMOSOME_V	2421866	2422894	+	WBGene00015731		cds
C13B9.2	0	0	1.54459	0.856466	2.44779	1.58404	0.950372	2.4593	0	0	CHROMOSOME_III	6620214	6622156	+	WBGene00015733		cds
C13B9.3	9.38907	9.17073	9.69471	11.3316	12.1749	11.7911	7.61595	13.5912	11.4422	13.7735	CHROMOSOME_III	6622602	6624919	-	WBGene00015734		cds
C13B9.4	0.564296	0.434641	0.325332	0.428233	0.990689	0.809143	0	1.63953	0.481529	0	CHROMOSOME_III	6632788	6652030	-	WBGene00015735	pdfr-1	cds
C13C12.1	0	0	0	0	0.106861	0.246884	0	0	0.963057	0	CHROMOSOME_V	12514857	12515667	-	WBGene00000285	cal-1	cds
C13C12.2	0	0	0	0	0	0	0	0	0	0	CHROMOSOME_V	12523628	12525637	-	WBGene00007552		cds
C13C4.1	0	0	0	0	0	0	0	0	0	0	CHROMOSOME_V	12104351	12106488	+	WBGene00007546	nhr-153	cds
C13C4.2	0	0	0	0	0	1.02178	1.42556	0.733557	1.44459	0.897533	CHROMOSOME_V	12101267	12103267	+	WBGene00007547	nhr-154	cds
C13C4.3	0	0	0	0	0	0	0	0.819766	0	0	CHROMOSOME_V	12107123	12109118	+	WBGene00003726	nhr-136	cds
C13C4.4	0	0	0	0	0.422433	0.881218	6.67207	3.10665	1.92611	5.61297	CHROMOSOME_V	12109149	12110959	-	WBGene00007548		cds
C13C4.5	0	0	0.162666	0	0	0	0	0	0	0	CHROMOSOME_V	12114972	12117542	+	WBGene00007549		cds
C13C4.6	0	0	0	0	0	0	0	0	0	0	CHROMOSOME_V	12121650	12125077	+	WBGene00007550		cds
C13C4.7	0	0	0	0	0	0	0	0	0	0	CHROMOSOME_V	12118973	12120795	-	WBGene00007551		cds
C13C4.8	0	0	0	0	0	0	0	0	0	0	CHROMOSOME_V	12117999	12118968	+	WBGene00195250		cds
C13D9.1	0	0	0	0	0	0	0	0	0	0	CHROMOSOME_V	5012979	5015197	+	WBGene00005657	srr-6	cds
C13D9.2	0	0	0	0	0	0	0	0	0	0	CHROMOSOME_V	5007214	5011713	+	WBGene00005656	srr-5	cds
C13D9.3	0	0	0	0	0	0	0	0	0	0	CHROMOSOME_V	5001477	5003399	+	WBGene00005659	srr-8	cds
C13D9.4	0	0	0	0	0	0	0	0	0	0	CHROMOSOME_V	4977920	4979146	-	WBGene00015736	srsx-11	cds
C13D9.5	0	0	0	0	0	0	0	0	0	0	CHROMOSOME_V	4979933	4980959	-	WBGene00015737	srsx-12	cds
C13D9.6	0	0	0	0	0	0	0	0	0	0	CHROMOSOME_V	4981795	4983177	-	WBGene00015738	srsx-13	cds
C13D9.7	0	0	0	0	0.140811	0.387449	0	0	0	1.19784	CHROMOSOME_V	4983735	4987183	-	WBGene00003573	ncx-8	cds
C13D9.8	0	0	0	0	0	0	0	0	0	0	CHROMOSOME_V	4991490	4995049	-	WBGene00003574	ncx-9	cds
C13D9.9	0	0	0	0	0	0	0	0	0	0	CHROMOSOME_V	4997008	5000553	-	WBGene00015739	ugt-7	cds
C13E3.1	0	0	0	0	0	0	0	0	0	0	CHROMOSOME_X	8893076	8898464	+	WBGene00015740		cds
C13F10.1	0	0	0	0.156952	0	0.493769	0	0	0.94225	0.749075	CHROMOSOME_V	7223836	7225046	+	WBGene00015741		cds
C13F10.2	0	0.975931	1.32111	3.36193	4.75476	3.90515	0.950372	1.63953	2.35562	3.21729	CHROMOSOME_V	7221461	7222039	+	WBGene00015742		cds
C13F10.4	6.78515	11.7745	20.3456	17.5924	19.8238	20.7403	28.0879	37.1073	24.7898	28.7448	CHROMOSOME_V	7205603	7214885	-	WBGene00015743		cds
C13F10.5	4.29681	7.38085	9.49249	8.60729	7.6489	8.37615	6.18715	0.733557	3.32908	7.25958	CHROMOSOME_V	7214999	7219022	-	WBGene00015744		cds
C13F10.6	6.56759	9.98467	8.67916	7.39429	10.0288	10.6252	9.048	13.3326	9.48492	5.76143	CHROMOSOME_V	7219104	7221023	-	WBGene00015745		cds
C13F10.7	6.22085	9.82269	15.7742	19.3131	17.1006	18.4841	29.5134	34.9067	25.1881	25.3031	CHROMOSOME_V	7222031	7223261	-	WBGene00015746		cds
C13G3.1	0	0	0	0.563874	0.140811	0.246884	0.475186	0.733557	1.91571	2.9963	CHROMOSOME_V	11011425	11012444	-	WBGene00007553		cds
C13G3.2	0	0	0	0	0	0	0	0	0	0	CHROMOSOME_V	11021043	11022855	-	WBGene00001991	hot-6	cds
C13G3.3	22.7282	31.3485	39.6332	48.5104	54.4223	54.5602	37.5916	63.3853	35.7401	49.1772	CHROMOSOME_V	11027153	11030827	-	WBGene00007554	pptr-2	cds
C13G5.1	0	0	0	0	0	0	0	0	0	0	CHROMOSOME_III	8622578	8625920	+	WBGene00000439	ceh-16	cds
C13G5.2	12.095	11.7745	13.3129	10.9345	13.3025	12.038	8.56632	6.2995	9.49532	11.2226	CHROMOSOME_III	8616698	8618359	-	WBGene00015747		cds
C14A11.2	0	0	0	0	0	0	0	0	0	0	CHROMOSOME_X	2803104	2804822	+	WBGene00015748		cds
C14A11.3	0	0	0.162666	0.156952	0.388483	3.84025	5.70547	3.66779	3.81061	7.70835	CHROMOSOME_X	2785593	2799235	+	WBGene00006496	cgef-1	cds
C14A11.5	0	0	0	0	0	0	0	0	0	0	CHROMOSOME_X	2805067	2807520	-	WBGene00015750		cds
C14A11.6	0	0	0	0	0	0	0	0	0	0	CHROMOSOME_X	2810476	2814117	-	WBGene00015751		cds
C14A11.7	0	0	0	0	0	0	0.953616	0	0	0	CHROMOSOME_X	2823492	2826819	-	WBGene00006055	ssr-2	cds
C14A11.9	0	0	0	0	1.02464	9.68264	14.7567	10.0535	8.06114	8.60588	CHROMOSOME_X	2807908	2809623	-	WBGene00050944		cds
C14A4.1	19.2268	22.5772	23.0882	21.6228	14.2003	4.04572	4.28641	4.01262	3.30828	3.66606	CHROMOSOME_II	10579894	10580985	+	WBGene00007555	dohh-1	cds
C14A4.10	12.3261	13.8924	14.4926	18.662	11.33	12.6003	4.75835	10.5284	14.3314	16.7664	CHROMOSOME_II	10604970	10605555	-	WBGene00006397	taf-13	cds
C14A4.11	7.0163	5.80829	5.46835	10.9558	8.7804	10.4954	11.4304	7.11927	12.3533	11.5988	CHROMOSOME_II	10605659	10607566	-	WBGene00007561		cds
C14A4.12	0	0	0	0	0	0	0	0	0.471125	0	CHROMOSOME_II	10612961	10618276	+	WBGene00007562		cds
C14A4.13	0	0	0	0	0	0	0	0	0	0	CHROMOSOME_II	10618412	10620445	+	WBGene00007563		cds
C14A4.14	26.2567	29.5154	23.4758	20.8515	21.5236	14.8943	16.6542	13.8075	9.53694	17.1392	CHROMOSOME_II	10582557	10584177	+	WBGene00007564	mrps-22	cds
C14A4.15	0	0	0	0	0	0	0	0	0	0	CHROMOSOME_II	10600427	10602217	-	WBGene00005713	srv-2	cds
C14A4.2	8.59361	12.2132	9.00449	9.04906	8.54276	5.63334	1.90399	1.55332	3.78981	3.66606	CHROMOSOME_II	10581072	10582460	+	WBGene00000933	dap-3	cds
C14A4.3	3.28379	7.97345	8.15012	7.95039	9.22676	9.71689	9.04475	11.4344	14.2586	9.73119	CHROMOSOME_II	10584285	10587874	+	WBGene00007556		cds
C14A4.4	20.9197	27.3421	22.927	25.9768	25.5542	19.5743	23.336	16.6555	24.2979	18.8584	CHROMOSOME_II	10587983	10592594	+	WBGene00000796	crn-3	cds
C14A4.5	9.62022	6.4009	6.21939	7.00091	6.32259	4.99901	11.4304	1.46711	4.78407	4.19075	CHROMOSOME_II	10592691	10593471	+	WBGene00000798	crn-5	cds
C14A4.6	0	0	0	0	0	0	0	0	0	0	CHROMOSOME_II	10593223	10594719	-	WBGene00007557		cds
C14A4.7	0	0	0	0	0	0	0	0	0	0	CHROMOSOME_II	10595203	10596503	-	WBGene00007558		cds
C14A4.8	0	0	0	0	0	0	0	0	0	0	CHROMOSOME_II	10597074	10598041	-	WBGene00007559		cds
C14A4.9	0	0	0	0	0	0	0	0	0	0	CHROMOSOME_II	10599271	10600470	+	WBGene00007560		cds
C14A6.1	0	0	0	0	0	0	0	0	0	0	CHROMOSOME_V	18157999	18159582	+	WBGene00007565	clec-48	cds
C14A6.12	0	0	0	0	0	0	0	0	0	0	CHROMOSOME_V	18162006	18162640	-	WBGene00050955		cds
C14A6.13	0	0	0	0	0	0	0	0	0	0	CHROMOSOME_V	18159625	18161311	-	WBGene00050956		cds
C14A6.16	0	0	0	0	0	0	0	0	0	0	CHROMOSOME_V	18146937	18148225	+	WBGene00206536		cds
C14A6.2	0	0	0	0	0	0	0	0	0	0	CHROMOSOME_V	18148783	18154368	+	WBGene00007566		cds
C14A6.3	0	0	0	0	0	0	0	0	0	0	CHROMOSOME_V	18146349	18146607	+	WBGene00007567		cds
C14A6.5	0	0	0	0	0	0	0	0	0	0	CHROMOSOME_V	18163603	18164800	-	WBGene00007569		cds
C14A6.6	0	0	0	0	0	0	0	0	0	0	CHROMOSOME_V	18165266	18167203	-	WBGene00007570		cds
C14A6.7	0	0	0	0	0	0	0	0	0	0	CHROMOSOME_V	18167606	18168422	-	WBGene00007571		cds
C14A6.8	0	0	0	0	0	0	0	0	0	0	CHROMOSOME_V	18169059	18171590	-	WBGene00007572		cds
C14B1.1	47.8292	51.8632	49.5697	46.6832	45.8845	58.013	58.0311	80.6882	93.5057	64.6631	CHROMOSOME_III	3699701	3701458	-	WBGene00003962	pdi-1	cds
C14B1.10	2.37276	0.869282	3.73984	1.95513	1.34522	0.843388	0.475186	0.733557	1.91571	0.448767	CHROMOSOME_III	3709312	3713264	+	WBGene00007581	alkb-8	cds
C14B1.12	7.23386	10.2533	14.3695	15.0365	12.899	11.6541	9.048	3.92641	4.76327	6.06174	CHROMOSOME_III	3724203	3724962	-	WBGene00184990		cds
C14B1.2	6.55399	20.6646	36.0758	32.6097	37.2399	35.1914	54.2393	63.5577	63.9006	45.4353	CHROMOSOME_III	3702264	3703154	+	WBGene00007573		cds
C14B1.3	0	0.21732	0.162666	0.449544	0.92279	1.51197	1.42556	0	1.43418	0.224383	CHROMOSOME_III	3703630	3705036	+	WBGene00007574		cds
C14B1.4	4.8611	10.6326	13.1305	13.0601	13.0927	17.9596	17.6013	14.8859	17.127	22.9732	CHROMOSOME_III	3705247	3706767	+	WBGene00006474		cds
C14B1.5	8.26047	5.42497	8.49523	5.3306	4.53101	3.62402	1.42556	1.46711	6.17664	4.26328	CHROMOSOME_III	3706866	3709204	+	WBGene00007576	dph-1	cds
C14B1.6	1.24417	5.26298	4.10621	3.76108	5.0553	5.10174	3.32955	6.21329	3.34989	3.81791	CHROMOSOME_III	3713443	3718729	+	WBGene00007577	nrde-1	cds
C14B1.7	8.24688	14.485	18.9425	15.2943	8.96018	4.18987	0.475186	3.10665	1.42378	2.39568	CHROMOSOME_III	3719886	3723579	-	WBGene00007578		cds
C14B1.8	1.24417	2.98313	5.01991	4.84621	4.3223	3.69968	3.32955	3.8402	2.83715	2.99291	CHROMOSOME_III	3718716	3719655	-	WBGene00007579		cds
C14B1.9	6.78515	15.8403	19.2678	18.3501	25.9978	26.0132	27.1278	33.8283	27.1766	32.7112	CHROMOSOME_III	3725056	3726484	-	WBGene00007580		cds
C14B4.2	0	0	0	0	0	0.246884	0	0	0.481529	0.448767	CHROMOSOME_V	19332696	19349458	-	WBGene00007583		cds
C14B9.1	0	0	0.833108	0.542563	0.636156	1.44348	6.66558	3.27906	3.31868	5.31606	CHROMOSOME_III	8138024	8139565	+	WBGene00002011		cds
C14B9.10	24.5367	19.1041	25.3655	18.4469	12.7921	12.2128	10.0016	9.31994	8.10276	12.4238	CHROMOSOME_III	8130796	8132376	+	WBGene00015755		cds
C14B9.2	0.679874	0.869282	1.30133	1.26339	0.534307	1.05603	2.38242	0.733557	0.471125	2.39568	CHROMOSOME_III	8133599	8136583	+	WBGene00015752		cds
C14B9.3	0	0	0	0	0	0	0	0	0	0	CHROMOSOME_III	8108724	8111198	+	WBGene00015753		cds
C14B9.4	39.8134	33.2098	48.8414	52.2638	64.2323	54.7693	46.1612	58.4228	59.0229	49.7779	CHROMOSOME_III	8101281	8104010	+	WBGene00004042	plk-1	cds
C14B9.6	0	0	0	0	1.12649	3.6961	2.85111	2.28688	0.952653	3.36914	CHROMOSOME_III	8111100	8125409	-	WBGene00001565	gei-8	cds
C14B9.7	446.045	311.018	282.569	238.678	186.286	194.849	137.158	43.5354	35.5528	14.2948	CHROMOSOME_III	8129484	8130397	-	WBGene00004433	rpl-21	cds
C14B9.8	2.93706	4.44904	3.13021	6.08051	5.9831	5.28014	5.23678	9.96729	7.64203	5.31267	CHROMOSOME_III	8139545	8144565	-	WBGene00015754		cds
C14C10.1	0	0	0	0	0	0	0	0	0	0	CHROMOSOME_V	12588409	12589602	+	WBGene00007584		cds
C14C10.2	0.564296	2.22452	2.03259	1.12775	1.37917	1.58404	1.4288	0	0	0.448767	CHROMOSOME_V	12590960	12592463	-	WBGene00007585		cds
C14C10.3	20.1379	24.9043	17.5408	24.2426	22.0818	19.3131	19.0334	14.5411	15.2216	16.0932	CHROMOSOME_V	12596371	12599135	-	WBGene00007586	ril-2	cds
C14C10.4	7.81176	9.27738	7.47968	10.1981	9.10099	7.22097	9.04151	6.86064	6.22866	6.95927	CHROMOSOME_V	12592547	12596280	-	WBGene00007587		cds
C14C10.5	47.6116	49.4767	46.8513	62.0181	60.7677	53.4807	48.5371	89.0144	71.0403	57.6415	CHROMOSOME_V	12600268	12607287	+	WBGene00007588		cds
C14C10.6	0.679874	0.813946	1.19948	1.12775	0.88884	1.83093	0.953616	2.37309	2.36603	2.76852	CHROMOSOME_V	12607393	12608090	+	WBGene00007589		cds
C14C10.7	0	0	0	0	0.106861	0	0	0	0	0	CHROMOSOME_V	12589693	12590637	-	WBGene00007590	ttr-43	cds
C14C11.1	0	0	0	0.135641	0.354534	0	0	0	0.471125	0	CHROMOSOME_V	5663584	5665247	+	WBGene00015765		cds
C14C11.2	4.06565	3.69042	6.95064	7.86515	11.8404	7.31653	7.6192	6.21329	6.19745	10.6253	CHROMOSOME_V	5660912	5663480	+	WBGene00015766		cds
C14C11.3	0	0	0.162666	0	0	0.140565	0	0	0.471125	1.49815	CHROMOSOME_V	5654431	5658671	+	WBGene00015767	hex-2	cds
C14C11.4	0	0	0	0	0	0	0	0	0	0	CHROMOSOME_V	5647548	5651027	+	WBGene00015768		cds
C14C11.5	0	0	0	0	0	0	0	0	0	0	CHROMOSOME_V	5644471	5646215	+	WBGene00006008	srx-117	cds
C14C11.6	7.11829	6.34958	9.36938	7.2935	7.99341	4.82061	3.80798	5.56595	3.80021	3.21729	CHROMOSOME_V	5658691	5660690	-	WBGene00003507	mut-14	cds
C14C11.7	10.3001	21.0087	25.551	22.8262	21.8364	22.6632	25.7119	24.8532	36.5367	37.8652	CHROMOSOME_V	5665223	5666447	-	WBGene00015769		cds
C14C11.8	0	0.21732	0	0.156952	0	0	0	0	0	0	CHROMOSOME_V	5669632	5676071	-	WBGene00004104	pqn-13	cds
C14C6.1	0	0	0	0	0	0	0	0	0	0	CHROMOSOME_V	560196	562957	+	WBGene00005898	srx-7	cds
C14C6.10	0	0	0	0	0	0	0	0	0	0	CHROMOSOME_V	564392	566085	-	WBGene00005585	sri-73	cds
C14C6.12	0	0	0	0	0	0	0	0	0	0	CHROMOSOME_V	570572	571178	-	WBGene00015763		cds
C14C6.13	0	0	0	0	0	0	0	0	0	0	CHROMOSOME_V	572032	574740	-	WBGene00015764		cds
C14C6.2	0	0	0	0	0	0	0	0	0	0	CHROMOSOME_V	563136	564383	+	WBGene00015756		cds
C14C6.3	0	0	0	0	0	0	0	0	0	0	CHROMOSOME_V	543470	545360	+	WBGene00015757		cds
C14C6.4	0	0	0	0	0	0	0	0	0	0	CHROMOSOME_V	539203	541487	+	WBGene00015758	nhr-155	cds
C14C6.5	0	0	0	0	0.281622	0.246884	0	0	0	0	CHROMOSOME_V	536629	537419	+	WBGene00015759		cds
C14C6.6	0	0	0	0	0	0	0	0	0	0	CHROMOSOME_V	545845	548081	-	WBGene00015760		cds
C14C6.7	0	0	0	0	0	0	0	0	0	0	CHROMOSOME_V	548703	550654	-	WBGene00015761		cds
C14C6.8	0	0	0	0	0	0	0	0	0	0	CHROMOSOME_V	551280	552979	-	WBGene00015762		cds
C14C6.9	0	0	0	0	0	0	0	0	0	0	CHROMOSOME_V	554375	556156	-	WBGene00005899	srx-8	cds
C14E2.1	0	0	0	0	0	0	0	0	0	0	CHROMOSOME_X	1826460	1827348	+	WBGene00015770		cds
C14E2.11	0	0	0	0	0	0	0	0	0	0	CHROMOSOME_X	1801359	1805081	+	WBGene00206378		cds
C14E2.2	0	0	0	0	0	0	0	0	0	0	CHROMOSOME_X	1806749	1809537	-	WBGene00015771		cds
C14E2.3	0	0	0	0	0	0	0	0	0	0	CHROMOSOME_X	1810680	1811530	-	WBGene00015772		cds
C14E2.4	0	0	0	0	0	0	0	0	0	0	CHROMOSOME_X	1818859	1821318	-	WBGene00015773		cds
C14E2.5	0	0	0	0	0	0	0	0	0	0	CHROMOSOME_X	1823610	1825334	-	WBGene00015774		cds
C14E2.6	0	0	0	0	0	0	0	0	0	0	CHROMOSOME_X	1827732	1828481	-	WBGene00015775		cds
C14E2.7	0	0	0	0	0	0	0	0	0	0	CHROMOSOME_X	1816355	1816756	+	WBGene00044562		cds
C14F11.1	0	1.41057	0.975997	1.46296	12.8828	38.7811	42.8511	57.9479	58.1223	58.0902	CHROMOSOME_X	6240919	6242690	+	WBGene00015778		cds
C14F11.2	0	0	0.386147	0.470856	0.247672	0.634333	1.4288	0.733557	1.8845	1.87099	CHROMOSOME_X	6208731	6213876	-	WBGene00015779		cds
C14F11.3	0	0	0	0	0.106861	0.140565	0	0	0	0	CHROMOSOME_X	6226096	6230665	-	WBGene00001803	lite-1	cds
C14F11.4	0	0	0	0.292593	0.247672	0	0	0	0.952653	1.19784	CHROMOSOME_X	6230883	6233012	-	WBGene00015780		cds
C14F11.5	0	0	0.223481	0	0	0	0	0	0	0	CHROMOSOME_X	6233113	6235505	-	WBGene00002024	hsp-43	cds
C14F11.6	0	0	0.162666	0	0	0.140565	0	0	0	0	CHROMOSOME_X	6237985	6239051	-	WBGene00015781		cds
C14F11.7	0	0	0	0	0	0	0	0	0	0	CHROMOSOME_X	6208126	6208528	-	WBGene00015782		cds
C14F5.1	0.564296	0	0.325332	0.156952	0.140811	2.29045	3.81122	6.2995	5.2448	9.05804	CHROMOSOME_X	7954307	7956143	+	WBGene00015776	dct-1	cds
C14F5.2	0	0	0	0	0	0	0	0	0	0	CHROMOSOME_X	7930690	7931760	+	WBGene00006980	zig-3	cds
C14F5.3	0	0	0.223481	0.135641	0.320584	0.493769	0	0.819766	0	0.448767	CHROMOSOME_X	7937519	7945000	-	WBGene00006588	tnt-3	cds
C14F5.4	0	0	0	0	0.422433	1.16235	0	3.10665	3.31868	2.62007	CHROMOSOME_X	7956147	7958261	-	WBGene00015777	sfxn-2	cds
C14F5.5	0	0	0.325332	0.428233	1.09254	3.34289	7.14077	1.63953	9.0346	5.23674	CHROMOSOME_X	7959779	7961677	-	WBGene00004774	sem-5	cds
C14H10.1	0	0	0	0.449544	0	0	0	1.55332	0.481529	0.448767	CHROMOSOME_X	10233685	10236886	-	WBGene00007591		cds
C14H10.2	0	0.596626	0.325332	0.292593	0.106861	0.140565	0.475186	3.02044	0	2.09537	CHROMOSOME_X	10242267	10251295	-	WBGene00007592		cds
C14H10.3	0	0	0	0.156952	0	0	0	0	0.471125	0	CHROMOSOME_X	10220613	10228076	-	WBGene00007593		cds
C14H10.4	0	0	0	0	0	0	0	0	0	0	CHROMOSOME_X	10239303	10240979	-	WBGene00006135	str-74	cds
C15A11.1	0	0	0	0	0	0	0	0	0	0	CHROMOSOME_I	7385868	7387106	-	WBGene00000612	col-35	cds
C15A11.2	0	0	0	0	0	0	0	0	0	0	CHROMOSOME_I	7384395	7388792	+	WBGene00007597		cds
C15A11.3	0	0	0	0	0	0.140565	0	0	0	0	CHROMOSOME_I	7389043	7395915	-	WBGene00004944	sol-1	cds
C15A11.4	0	0	0	0	0	0	0	0	0	0	CHROMOSOME_I	7398821	7401020	-	WBGene00007598		cds
C15A11.5	0	0	0	0	0	0	0	0	0	0	CHROMOSOME_I	7401672	7402753	+	WBGene00000596	col-7	cds
C15A11.6	0	0	0	0	0	0	0	0	0	0	CHROMOSOME_I	7403338	7404349	-	WBGene00000638	col-62	cds
C15A11.7	0	0	0	0	0	0	0	0	0	0	CHROMOSOME_I	7405027	7408508	+	WBGene00007599		cds
C15A7.1	0	0	0	0	0	0	0	0	0	0	CHROMOSOME_X	12065196	12067364	+	WBGene00007594	lgc-23	cds
C15A7.2	0	0	0	0	0	0	0	0	0	0	CHROMOSOME_X	12070675	12073795	-	WBGene00007595		cds
C15A7.4	0	0	0	0	0	0	0	0	0	0	CHROMOSOME_X	12068482	12070495	+	WBGene00045385	lgc-24	cds
C15B12.1	0	0	0	0	0	0	0	0	0	0	CHROMOSOME_X	6476776	6479048	+	WBGene00015783		cds
C15B12.2	0	0	0	0	0	0	0	0	0	0	CHROMOSOME_X	6463375	6465396	+	WBGene00015784		cds
C15B12.3	0	0	0	0	0	0	0	0	0	0	CHROMOSOME_X	6467247	6467525	-	WBGene00015785		cds
C15B12.4	0	0	0	0	0	0	0	0	0	0	CHROMOSOME_X	6470329	6473711	-	WBGene00015786		cds
C15B12.5	0	0	0	0	0.140811	0	0	0	0	1.49815	CHROMOSOME_X	6479601	6484773	-	WBGene00001517	gar-1	cds
C15B12.6	0	0	0	0	0	0.140565	0	0	0	0	CHROMOSOME_X	6497883	6499799	-	WBGene00015787		cds
C15B12.7	0	0	0.162666	0	0	4.82778	5.23678	0.733557	2.38684	4.19075	CHROMOSOME_X	6499872	6504576	-	WBGene00000393	cdf-1	cds
C15B12.8	0	0	0	0	0	0	0	0	0	0	CHROMOSOME_X	6474237	6476743	+	WBGene00015788		cds
C15B12.9	0	0	0	0	0	0	0	0	0	0	CHROMOSOME_X	6468762	6469766	+	WBGene00044573		cds
C15C6.1	0	0	0	0	0	0.528014	0.475186	0	0	0	CHROMOSOME_I	12202221	12203708	+	WBGene00007600		cds
C15C6.2	0	0.21732	0.223481	0	0	0.140565	0	0	0	0	CHROMOSOME_I	12203791	12205800	+	WBGene00007601		cds
C15C6.3	0	0.379305	1.19948	0.585185	0.495345	1.26867	0.475186	0	0.481529	0	CHROMOSOME_I	12207086	12212197	+	WBGene00007602		cds
C15C6.4	4.8611	10.364	5.20383	11.0972	8.26114	8.27341	10.4703	7.29169	7.11889	10.8497	CHROMOSOME_I	12213100	12215175	+	WBGene00007603		cds
C15C7.1	0	0	0.162666	0	0.140811	1.16235	0.950372	1.63953	1.42378	3.36914	CHROMOSOME_X	3164513	3165646	+	WBGene00015789	syx-6	cds
C15C7.2	0	0	0	0.313904	0.844866	3.20591	4.28965	2.4593	4.75286	0	CHROMOSOME_X	3159928	3164419	+	WBGene00002220	klp-8	cds
C15C7.4	0	0	0	0	0	0	0	0	0	0	CHROMOSOME_X	3146563	3147078	+	WBGene00015790		cds
C15C7.5	0.679874	0	0.162666	0.313904	0.140811	3.77176	2.37593	2.4593	4.31295	1.42222	CHROMOSOME_X	3151135	3152453	-	WBGene00015791		cds
C15C7.6	0	0	0.162666	0.156952	0	0	0	0	0	0	CHROMOSOME_X	3167560	3170498	-	WBGene00015792		cds
C15C7.7	0	0	0	0.292593	0.422433	0.774898	3.33279	3.754	2.37643	0.224383	CHROMOSOME_X	3165786	3167589	+	WBGene00015793		cds
C15C8.1	0	0	0	0	0	0	0	0	0	0	CHROMOSOME_V	12734166	12736024	+	WBGene00007604		cds
C15C8.2	0	0	0	0	0	0	0	0	0	0	CHROMOSOME_V	12736686	12741194	+	WBGene00000521	cky-1	cds
C15C8.3	1.35975	0	0.162666	0	0	0	0.953616	0	0	0	CHROMOSOME_V	12742022	12744153	+	WBGene00007605		cds
C15C8.4	1.80847	5.96626	5.87279	5.05355	7.81865	7.77964	8.56957	5.95467	4.28174	9.73119	CHROMOSOME_V	12745183	12747447	-	WBGene00007606		cds
C15C8.5	0	0	0	0	0	0	0	0	0	0	CHROMOSOME_V	12748275	12749946	+	WBGene00007607		cds
C15C8.6	0	0	0	0	0	0	0	0	0	0	CHROMOSOME_V	12750013	12751528	-	WBGene00007608		cds
C15C8.7	15.6235	22.5732	26.1789	19.6115	20.2474	15.8026	23.8047	16.7417	14.7297	24.7059	CHROMOSOME_V	12744143	12745033	-	WBGene00007609		cds
C15C8.8	0	0	0	0	0	0	0	0	0	0	CHROMOSOME_V	12751586	12752490	-	WBGene00045460		cds
C15F1.1	0	0	0	0	0	0	0	0	0.481529	0	CHROMOSOME_II	6988736	6991644	+	WBGene00015794		cds
C15F1.2	0	0	0	0	0	0	0.475186	0	0.471125	0.448767	CHROMOSOME_II	6979909	6988587	+	WBGene00015795		cds
C15F1.3	4.29681	6.29022	6.70738	12.0041	19.0368	22.7803	21.4191	28.4348	21.5127	31.5926	CHROMOSOME_II	6955364	6965645	-	WBGene00006605	tra-2	cds
C15F1.4	8.94035	9.98467	6.66635	9.47729	9.67927	5.20806	8.08789	13.0739	8.60509	5.61297	CHROMOSOME_II	6965758	6967606	-	WBGene00004090	ppp-1	cds
C15F1.5	1.24417	1.51722	1.21925	1.46296	0.709067	1.47772	0.953616	0	0	0	CHROMOSOME_II	6967862	6970543	-	WBGene00015796		cds
C15F1.6	11.4151	21.7552	26.2382	13.5174	16.8957	21.025	19.0399	22.2215	18.5819	28.0683	CHROMOSOME_II	6970626	6972195	-	WBGene00000198	art-1	cds
C15F1.7	42.1862	44.2931	49.3081	49.9674	45.5578	44.0071	45.2108	49.7064	69.7102	67.0757	CHROMOSOME_II	6972670	6973850	-	WBGene00004930	sod-1	cds
C15F1.8	1.35975	2.3865	2.96755	2.36205	1.27732	1.69036	0	0	0.471125	0.448767	CHROMOSOME_II	6976768	6977325	-	WBGene00015797		cds
C15H11.1	0	0	0	0	0	0	0	0	0	0	CHROMOSOME_V	14393843	14394449	+	WBGene00007613		cds
C15H11.10	0	0	0	0	0	0	0	0	0	0	CHROMOSOME_V	14392225	14393546	+	WBGene00007618		cds
C15H11.11	0	0.21732	0.325332	0.292593	0	0.140565	0	0.733557	0	0	CHROMOSOME_V	14415799	14416131	+	WBGene00007619		cds
C15H11.13	0	0	0	0	0	0	0	0	0	0	CHROMOSOME_V	14395021	14395734	+	WBGene00077576		cds
C15H11.2	0	0	0	0	0	0	0	0	0	0	CHROMOSOME_V	14409063	14411880	+	WBGene00007614	gnrr-2	cds
C15H11.3	1.24417	0	0.162666	0.542563	0	0	0	0	0	0.224383	CHROMOSOME_V	14412390	14415777	-	WBGene00003834	nxf-1	cds
C15H11.4	12.4417	15.6742	19.8364	19.1775	22.4224	23.1263	23.336	21.7465	19.9537	28.4377	CHROMOSOME_V	14420037	14421435	-	WBGene00000985	dhs-22	cds
C15H11.5	10.5177	11.2333	14.2889	7.95039	9.57127	8.94199	4.28965	6.94685	3.78981	7.63242	CHROMOSOME_V	14417940	14420066	+	WBGene00007615	set-31	cds
C15H11.6	9.7222	4.67038	6.68613	8.32823	5.56568	3.20233	3.81122	3.02044	3.33949	4.33921	CHROMOSOME_V	14416100	14417814	-	WBGene00003835	nxf-2	cds
C15H11.7	61.1955	50.1014	40.1212	63.1165	56.4554	45.2722	35.2027	49.4477	45.2979	52.6915	CHROMOSOME_V	14421440	14422605	-	WBGene00003922	pas-1	cds
C15H11.8	3.73251	6.8949	7.90686	4.68148	5.11932	5.45136	3.80473	3.19286	5.69511	4.26328	CHROMOSOME_V	14422705	14423346	-	WBGene00007616		cds
C15H11.9	41.3772	40.4166	30.4265	22.3456	20.6158	17.6335	18.0927	16.8279	14.7713	9.05465	CHROMOSOME_V	14423767	14424995	-	WBGene00007617	rrbs-1	cds
C15H7.3	0	0	0	0	0	0	0	0	0	0	CHROMOSOME_III	9650337	9651875	-	WBGene00007610		cds
C15H7.4	0	0	0	0	0	0	0	0	0	0	CHROMOSOME_III	9654268	9655775	-	WBGene00007611		cds
C15H9.1	0	0	0.162666	0	0	0	0	0	0	0	CHROMOSOME_X	6122280	6127506	+	WBGene00003778	nnt-1	cds
C15H9.11	0	0	0	0	0	0	0	0	0	0	CHROMOSOME_X	6102846	6103397	-	WBGene00015805		cds
C15H9.2	0	0	0	0	0	0	0	0	0	0	CHROMOSOME_X	6118676	6120401	+	WBGene00015798		cds
C15H9.3	0	0	0	0	0	0	0	0	0	0	CHROMOSOME_X	6115769	6118016	+	WBGene00015799		cds
C15H9.4	0	0	0	0	0	0.246884	0	0	0	0	CHROMOSOME_X	6101180	6105427	+	WBGene00015800		cds
C15H9.5	0	0	0	0.156952	0.140811	1.19659	1.90723	1.63953	0.963057	2.1713	CHROMOSOME_X	6093251	6097536	+	WBGene00015801		cds
C15H9.6	3.73251	2.54849	2.68325	1.75556	7.33721	43.4484	61.4223	46.3411	57.1904	36.826	CHROMOSOME_X	6088993	6092089	-	WBGene00002007	hsp-3	cds
C15H9.7	0	0	0.162666	0.135641	0	0	0	0	0	0	CHROMOSOME_X	6106882	6109310	-	WBGene00015802		cds
C15H9.8	0	0	0	0	0	0.246884	0	0	0	0	CHROMOSOME_X	6110760	6112881	-	WBGene00004193	prx-3	cds
C15H9.9	3.38578	3.0938	4.61398	13.5658	8.54276	17.3595	43.3133	69.5108	83.508	60.2717	CHROMOSOME_X	6127419	6128291	-	WBGene00015803		cds
C16A11.1	0	0	0	0	0	0	0	0	0	0	CHROMOSOME_II	4247200	4255284	+	WBGene00001673	gpa-11	cds
C16A11.10	4.97668	6.78422	4.89828	4.23194	6.55135	6.44249	11.4272	0.819766	3.81061	5.46452	CHROMOSOME_II	4231386	4234623	+	WBGene00185089		cds
C16A11.2	12.4417	14.481	15.5492	15.8155	19.0468	13.3481	13.8128	13.8075	12.3637	14.1429	CHROMOSOME_II	4238176	4244835	+	WBGene00015815		cds
C16A11.3	6.10527	9.874	6.91109	8.05695	5.00243	1.75885	2.37917	0	0.471125	0.224383	CHROMOSOME_II	4229589	4230811	+	WBGene00015816		cds
C16A11.4	39.7115	27.5635	29.7788	23.1517	17.4439	8.20134	1.90399	7.03306	7.60042	12.4997	CHROMOSOME_II	4227049	4229171	+	WBGene00015817		cds
C16A11.5	2.48834	4.82834	4.89828	2.43376	2.55465	2.39318	0.953616	0	0.471125	0	CHROMOSOME_II	4223317	4226333	+	WBGene00015818		cds
C16A11.6	7.23386	5.04566	7.9479	5.5031	9.38762	7.77964	5.24002	4.57376	5.71592	6.28952	CHROMOSOME_II	4236504	4237752	-	WBGene00015819	fbxc-44	cds
C16A11.7	0	0	0	0	0	0	0	0	0	0	CHROMOSOME_II	4255508	4256942	-	WBGene00015820		cds
C16A11.8	0	0	0	0	0	0	0	0	0	0	CHROMOSOME_II	4257095	4258784	-	WBGene00015821	clec-135	cds
C16A11.9	3.05264	0.596626	0.93496	0.949485	1.09755	0.281129	0	0	0	0.224383	CHROMOSOME_II	4234953	4235985	-	WBGene00045297	fbxc-43	cds
C16A3.1	3.73251	8.08815	4.08495	6.13091	7.68285	5.0675	5.24327	3.754	5.23439	7.40804	CHROMOSOME_III	6390893	6393790	+	WBGene00015806		cds
C16A3.10	7.13188	5.4803	5.42732	4.88105	3.96276	3.44921	2.37917	0.819766	4.29214	3.59352	CHROMOSOME_III	6394181	6396129	-	WBGene00015814		cds
C16A3.2	2.03962	3.85241	4.71584	5.11749	8.63572	6.86418	4.28641	4.01262	4.72165	3.81452	CHROMOSOME_III	6389780	6390785	+	WBGene00015807		cds
C16A3.3	32.3484	25.1891	20.5904	17.9199	15.0112	12.5011	16.1888	8.58638	12.3637	13.9219	CHROMOSOME_III	6383499	6389360	+	WBGene00002850	let-716	cds
C16A3.4	68.5585	65.8823	63.4739	69.9316	59.7303	42.8683	44.768	45.5213	36.0032	26.1939	CHROMOSOME_III	6381579	6382971	+	WBGene00015809		cds
C16A3.5	17.7515	22.1979	21.1179	16.9917	17.2452	11.0162	14.747	11.3482	10.9919	13.9185	CHROMOSOME_III	6380642	6381929	+	WBGene00015810		cds
C16A3.6	51.9084	58.1534	53.086	41.769	32.8636	21.4323	13.3214	7.03306	9.01379	6.36205	CHROMOSOME_III	6379396	6380621	+	WBGene00015811		cds
C16A3.7	26.012	33.6284	36.4194	44.5769	42.7065	35.5752	45.2011	45.4774	53.2758	51.276	CHROMOSOME_III	6375326	6379124	+	WBGene00007048	nfx-1	cds
C16A3.8	15.6099	18.6654	17.6213	21.3244	19.2455	18.9814	12.8495	24.1196	26.7263	13.846	CHROMOSOME_III	6367989	6374039	+	WBGene00015813	thoc-2	cds
C16A3.9	396.489	309.378	255.62	219.545	164.268	159.201	114.285	42.1106	29.3346	13.5457	CHROMOSOME_III	6374041	6374950	-	WBGene00004482	rps-13	cds
C16B8.1	0	0	0	0	0.106861	0	0.953616	1.46711	0	0	CHROMOSOME_X	3958477	3961886	+	WBGene00003007	lin-18	cds
C16B8.2	0	0	0	0	0	0	0	0	0	0	CHROMOSOME_X	3961910	3966374	-	WBGene00015822		cds
C16B8.3	0	0	0	0	0	0.246884	0	0	0	0	CHROMOSOME_X	3968016	3968617	-	WBGene00015823		cds
C16B8.4	0	0.21732	0	0.292593	0.106861	0	0	1.46711	1.8845	0.224383	CHROMOSOME_X	3970369	3973614	-	WBGene00015824		cds
C16C10.1	3.61693	11.6085	18.1504	18.8713	25.803	20.1095	19.9838	8.97511	23.2828	25.9763	CHROMOSOME_III	4178698	4181414	-	WBGene00007622		cds
C16C10.10	1.80847	2.82114	2.92651	3.60413	1.87953	5.10533	1.42556	1.63953	5.2656	6.06513	CHROMOSOME_III	4153575	4154619	+	WBGene00006448	glod-4	cds
C16C10.11	135.091	126.43	104.597	135.637	106.706	106.073	102.796	167.029	134.511	122.998	CHROMOSOME_III	4152026	4152886	+	WBGene00007630	har-1	cds
C16C10.12	0	0	0	0	0	0	0	0	0	0	CHROMOSOME_III	4147355	4151572	-	WBGene00007631	wht-3	cds
C16C10.13	0	0	0	0.135641	0.106861	0.246884	0	0	0	0	CHROMOSOME_III	4176652	4177552	+	WBGene00007632		cds
C16C10.2	17.1872	18.9854	20.224	15.9938	13.8947	12.8057	9.51669	11.8654	12.3429	10.8497	CHROMOSOME_III	4177506	4178642	-	WBGene00007623		cds
C16C10.3	20.0223	24.4697	46.5824	47.559	51.9984	41.549	34.7437	59.0702	54.3637	58.6149	CHROMOSOME_III	4172311	4176135	-	WBGene00007624	wago-9	cds
C16C10.4	10.3001	16.5516	16.5054	16.9646	14.385	10.2071	15.2351	10.3121	9.0242	20.505	CHROMOSOME_III	4171239	4172154	+	WBGene00007625		cds
C16C10.5	9.62022	11.5492	14.7374	18.5845	25.4234	18.9886	27.6159	21.4017	32.3798	25.2997	CHROMOSOME_III	4168771	4171135	-	WBGene00007626	rnf-121	cds
C16C10.6	9.95336	14.7023	13.7599	18.5186	16.9196	13.4886	10.9455	14.0661	8.16518	17.8917	CHROMOSOME_III	4166918	4168741	-	WBGene00007627	ccdc-55	cds
C16C10.7	6.10527	12.2605	15.8137	12.7036	16.6191	18.4912	21.4158	11.693	17.5981	25.4482	CHROMOSOME_III	4164246	4166821	-	WBGene00004381	rnf-5	cds
C16C10.8	4.29681	6.45623	7.13457	5.21627	2.58358	1.75885	4.28965	0.733557	2.82675	2.09537	CHROMOSOME_III	4161922	4164147	-	WBGene00007628		cds
C16C10.9	0	0	0	0	0	0	0	0	0	0	CHROMOSOME_III	4155362	4157368	-	WBGene00007629		cds
C16C2.1	0	0	0	0	0.106861	0.246884	0	0.733557	0	0	CHROMOSOME_I	9727195	9728012	+	WBGene00000430	ceh-5	cds
C16C2.2	0	0	0	0	0.281622	4.1592	3.80473	5.30732	1.42378	1.94692	CHROMOSOME_I	9722541	9725602	+	WBGene00001145	eat-16	cds
C16C2.3	2.82148	8.45941	9.43019	9.63424	10.3733	8.06077	4.75835	11.4344	10.0497	6.58643	CHROMOSOME_I	9715313	9728099	-	WBGene00007620	ocrl-1	cds
C16C2.4	7.13188	11.3319	15.5462	14.3448	16.0258	16.1594	19.9935	18.8123	16.687	23.3528	CHROMOSOME_I	9712814	9715223	-	WBGene00007621		cds
C16C4.1	0	0	0	0	0	0	0	0	0	0	CHROMOSOME_II	1894217	1894443	+	WBGene00015825		cds
C16C4.10	0	0	0	0	0	0	0	0	0	0	CHROMOSOME_II	1881616	1882810	-	WBGene00015834	math-5	cds
C16C4.11	0	0	0	0	0	0	0	0	0	0	CHROMOSOME_II	1883601	1884740	-	WBGene00015835	math-6	cds
C16C4.12	0	0	0	0	0	0	0	0	0	0	CHROMOSOME_II	1885444	1886484	-	WBGene00015836	math-7	cds
C16C4.13	0	0	0	0	0	0	0	0	0	0	CHROMOSOME_II	1887214	1889176	-	WBGene00015837	math-8	cds
C16C4.14	0	0	0	0	0	0.246884	0	0	0	0	CHROMOSOME_II	1889914	1890787	-	WBGene00015838	math-9	cds
C16C4.15	0	0	0	0	0	0	0	0	0	0	CHROMOSOME_II	1871553	1873266	+	WBGene00015839	math-10	cds
C16C4.16	0	0	0	0	0	0	0	0	0	0	CHROMOSOME_II	1874281	1875111	+	WBGene00015840	math-11	cds
C16C4.17	0	0	0	0	0	0	0	0	0	0	CHROMOSOME_II	1864583	1864889	+	WBGene00044359		cds
C16C4.18	1.80847	0.596626	0.386147	0.292593	0.849878	1.83093	1.90723	0	0.471125	0	CHROMOSOME_II	1860633	1861085	-	WBGene00194998		cds
C16C4.3	0	0	0	0	0	0	0	0	0	0	CHROMOSOME_II	1875963	1877242	+	WBGene00015827	math-13	cds
C16C4.4	1.35975	0	0	0	0	0	0	0	0	0	CHROMOSOME_II	1869415	1870802	+	WBGene00015828	math-14	cds
C16C4.5	0	0	0	0	0	0.281129	0	0	0	0	CHROMOSOME_II	1866391	1867899	+	WBGene00015829	math-15	cds
C16C4.6	0	0	0	0	0	0	0	0	0	0	CHROMOSOME_II	1862639	1863787	+	WBGene00015830	fbxb-98	cds
C16C4.8	0	0	0	0	0	0	0	0	0	0	CHROMOSOME_II	1877584	1878768	-	WBGene00015832	math-16	cds
C16C4.9	0	0	0	0	0	0	0	0	0	0	CHROMOSOME_II	1879595	1880713	-	WBGene00015833	math-17	cds
C16C8.10	0	0	0	0	0	0	0	0	0	0	CHROMOSOME_II	3464154	3464683	-	WBGene00015848		cds
C16C8.11	3.73251	0.651961	2.0934	0.856466	1.4571	1.30291	1.90723	1.55332	1.8845	0.897533	CHROMOSOME_II	3453767	3454683	+	WBGene00015849		cds
C16C8.12	1.80847	4.72169	6.82901	6.48743	7.36728	4.6458	2.85436	3.754	3.32908	3.66606	CHROMOSOME_II	3452645	3453605	+	WBGene00015850		cds
C16C8.13	1.92404	2.49717	4.57295	2.99763	3.21974	1.19659	0	1.55332	0.481529	0.224383	CHROMOSOME_II	3451424	3452417	+	WBGene00015851		cds
C16C8.14	1.12859	1.03127	2.15421	2.04815	1.73872	1.51197	2.86085	0	1.91571	2.69599	CHROMOSOME_II	3449565	3451062	+	WBGene00015852		cds
C16C8.16	12.095	19.1594	21.4813	22.5026	19.5233	15.3502	6.65909	6.86064	4.76327	4.48767	CHROMOSOME_II	3445768	3446740	+	WBGene00015853		cds
C16C8.17	0	0	0	0	0	0	0	0	0	0	CHROMOSOME_II	3440830	3442448	+	WBGene00015854		cds
C16C8.18	0	0	0	0	0	0	0	0	0	0	CHROMOSOME_II	3429409	3431308	+	WBGene00015855		cds
C16C8.19	0	0	0	0	0	0	0	0	0	0	CHROMOSOME_II	3458504	3459059	+	WBGene00015856		cds
C16C8.2	0	0	0	0	0	0	0	0	0	0.224383	CHROMOSOME_II	3431289	3436515	-	WBGene00015841		cds
C16C8.20	0.564296	0.596626	1.21925	0.585185	1.55895	1.23084	0.953616	0.733557	0	0	CHROMOSOME_II	3446960	3448023	+	WBGene00195070		cds
C16C8.21	1.12859	0	0	0	0.140811	0	0	0	0	0	CHROMOSOME_II	3448209	3448762	+	WBGene00195071		cds
C16C8.22	0	0.596626	0	0	0	0	0	0	0	0	CHROMOSOME_II	3442493	3443257	-	WBGene00195072		cds
C16C8.4	3.61693	6.57093	9.49249	8.60729	10.5291	9.1168	9.52643	6.77443	8.09235	7.18366	CHROMOSOME_II	3443485	3444385	-	WBGene00015842		cds
C16C8.5	1.35975	5.64631	5.99591	3.21852	4.23937	3.48346	3.33603	3.10665	0.963057	5.6889	CHROMOSOME_II	3444731	3445367	-	WBGene00015843		cds
C16C8.7	0	0	0	0	0	0	0	0	0	0	CHROMOSOME_II	3459622	3460317	-	WBGene00015845		cds
C16C8.8	0	0	0	0	0	0	0	0	0	0	CHROMOSOME_II	3461115	3461684	-	WBGene00015846		cds
C16C8.9	0	0	0	0	0	0	0	0	0	0	CHROMOSOME_II	3462573	3463208	-	WBGene00015847		cds
C16D2.1	0	0	0	0	0	0.246884	0	0	0	0	CHROMOSOME_II	9132153	9134477	+	WBGene00007633		cds
C16D2.2	0	0	0	0	0	0	0	0	0	0	CHROMOSOME_II	9136140	9137492	+	WBGene00195143		cds
C16D2.3	0	0	0	0	0	0	0	0	0	0	CHROMOSOME_II	9138058	9138369	+	WBGene00195144		cds
C16D6.1	0	0	0	0	0	0	0	0	0	0	CHROMOSOME_X	12525275	12525714	-	WBGene00007634		cds
C16D6.2	0	0	0	0	0	0.246884	0.953616	0	0	0	CHROMOSOME_X	12536945	12551608	-	WBGene00007635	npr-4	cds
C16D6.3	0	0	0	0	0	0	0	0	0	0	CHROMOSOME_X	12526591	12527217	+	WBGene00007636		cds
C16D9.1	0	0	0	0	0	0	0	0	0	0	CHROMOSOME_V	8259296	8261284	+	WBGene00015857		cds
C16D9.2	0	0	0	0	0.213723	0	0	0	0	0	CHROMOSOME_V	8228257	8238331	-	WBGene00004395	rol-3	cds
C16D9.3	0	0	0	0	0	0	0	0	0	0	CHROMOSOME_V	8238520	8240001	-	WBGene00015858		cds
C16D9.4	0	0	0	0	0	0	0	0	0	0	CHROMOSOME_V	8240911	8243181	-	WBGene00015859		cds
C16D9.5	0	0	0	0	0	0	0	0	0	0	CHROMOSOME_V	8243612	8245234	-	WBGene00015860		cds
C16D9.6	0	0	0.162666	0	0	1.65612	0.953616	4.01262	1.43418	3.81791	CHROMOSOME_V	8248092	8250269	-	WBGene00015861		cds
C16D9.7	0	0	0	0	0	0	0	0	0	0	CHROMOSOME_V	8256843	8258056	-	WBGene00015862	srt-25	cds
C16D9.8	0	0	0	0	0	0	0	0	0	0	CHROMOSOME_V	8261370	8263546	-	WBGene00015863		cds
C16D9.9	0	0	0	0	0	0	0	0	0	0	CHROMOSOME_V	8264221	8264643	+	WBGene00015864		cds
C16E9.1	0	0	0	0	0	0	0	0	0	0	CHROMOSOME_X	6940438	6943572	+	WBGene00015865		cds
C16E9.2	2.37276	0	0	0	0.140811	2.67431	7.13752	3.10665	3.84182	5.16421	CHROMOSOME_X	6935689	6938995	+	WBGene00015866		cds
C16E9.4	0	0	0	0	0	0	0	0	0	0	CHROMOSOME_X	6943699	6956357	-	WBGene00002123	inx-1	cds
C16H3.1	0	0	0	0	0	0	0	0	0	0	CHROMOSOME_X	17617751	17619382	+	WBGene00015867		cds
[truncated: 18,690 more rows]

## Sheet: Table S2B
Hermaphrodite transcript expression levels
Expression levels are normalized as described in M&M
						Gonad # 1										Gonad # 2
Open reading frame	1	2	3	4	5	6	7	8	9	10	1	2	3	4	5	6	7	8	9	10	WBGene
2L52.1	0	0	0	0	0	0.562259	1.90723	0	0	0	0	0	0	0	0	0.493769	0	0	0	0	WBGene00007063
2RSSE.1	0	0	0	0	0	0	0	0	0	0	0	0	0	0	0	0	0	0	0	0	WBGene00007064
2RSSE.2	0	0	0	0	0	0	0	0	0	0	0	0	0	0	0	0	0	0	0	0	WBGene00044165
3R5.1	0	3.04249	3.90399	4.3405	1.9235	2.53017	0	3.27906	1.8845	0.897533	2.25718	6.82749	4.02265	2.51123	2.5346	2.96261	0.950372	1.46711	0.963057	1.49815	WBGene00007065
4R79.1	0	0	0	0	0	0	0	0	0	0	0	0	0	0	0	0	0	0	0	0	WBGene00003525
4R79.2	0	0	0	0	0	0	0	0	0	0	0	0	0	0	0	0	0	0	0	0	WBGene00007067
6R55.2	0	0	0	0	0	0	0	0	0	0	0	0	0	0	0	0	0	0	0	0	WBGene00007069
AC3.1	0	0	0	0	0	0	0	0	0	0	0	0	0	0	0	0	0	0	0	0	WBGene00005532
AC3.10	0	0	0	0	0	0	0	0	0	0	0	0	0	0	0	0	0	0	0	0	WBGene00004964
AC3.12	0	0	0	0	0	0	0	0	0	0	0	0	0	0	0	0	0	0	0	0	WBGene00077503
AC3.2	0	0	0.325332	0	0	0	0	0	0	0	0	0	0	0	0	0	0	0	0	2.9963	WBGene00007070
AC3.3	0	0	0	0	0	0	0	0	0	0	0	0	0	0	0	0	0	0	0	0	WBGene00000024
AC3.4	0	0	0	0	0	0	0	0	0	0	0	0	0	0	0	0	0	0	0	0	WBGene00004098
AC3.5	0	0	0	0	0	0	0	0	0	0	0	0	0	0	0	0	0	0	0	0	WBGene00007071
AC3.6	0	0	0	0	0	0	0	0	0	0	0	0	0	0	0	0	0	0	0	0	WBGene00000724
AC3.7	0	0	0	0	0	0	0	0	0	0	0	0	0	0	0	0	0	0	0	0	WBGene00007072
AC3.8	0	0	0	0	0	0	0	0	0	0	0	0	0	0	0	0	0	0	0	0	WBGene00007073
AC7.1	0	0	0	0	0	0	0	0	0	0	0	0	0	0	0	0	0	0	0	0	WBGene00006428
AC7.2	0	0	0.650665	0.271281	0	5.90372	0	4.9186	2.82675	4.48767	1.12859	0	0	0.313904	1.97135	3.95015	7.60297	4.40134	6.7414	2.9963	WBGene00004929
AC7.3	0	0	0	0	0	0	0	0	0	0	0	0	0	0	0	0	0	0	0	0	WBGene00014997
AC8.10	0	0	0	0	0	0	0	0	0	0	0	0	0	0	0	0	0	0	0	0	WBGene00043988
AC8.11	0	0	0	0	0	0	0	0	0	0	0	0	0	0	0	0	0	0	0.963057	0	WBGene00043989
AC8.12	0	0	0	0	0	0.281129	0	0	0	0	0	0	0	0	0	0	0	0	0	0	WBGene00043990
AC8.3	0	0	0	0	0	0	0	0	0	0	0	0	0	0	0	0	0	0	0	0	WBGene00007075
AC8.4	0	0	0	0	0	0	0	0	0	0	0	0	0	0	0	0	0	0	0.963057	0	WBGene00007076
AC8.7	0	0	0	0	0	0.281129	0	0	0	0	0	0	0	0	0	0	0	0	0	0	WBGene00007079
AH10.1	0	0	0	0	0	0	0	0	0	0	0	0	0	0	0	0	0	0	0	0	WBGene00007082
AH10.2	0	0	0	0	0	0	0	0	0	0	0	0	0	0	0	0	0	0	0	0	WBGene00007083
AH10.3	0	0	0	0	0	0	0	0	0	0	0	0	0	0	0	0	0	0	0	0	WBGene00007084
AH10.4	0	0	0.325332	0	0	0	0	0	0	0	0	0	0	0	0.281622	0	0	0	0	0	WBGene00007085
AH6.1	0	0	0	0	0	0	0	0	0	0	0	0	0	0	0	0	0	0	0	0	WBGene00001528
AH6.10	0	0	0	0	0	0	0	0	0	0	0	0	0	0	0	0	0	0	0	0	WBGene00005032
AH6.11	0	0	0	0	0	0	0	0	0	0	0	0	0	0	0	0	0	0	0	0	WBGene00005033
AH6.12	0	0	0	0	0	0	0	0	0	0	0	0	0	0	0	0	0	0	0	0	WBGene00005034
AH6.14	0	0	0	0	0	0	0	0	0	0	0	0	0	0	0	0	0	0	0	0	WBGene00005035
AH6.17	0	0	0	0	0	0	0	0	0	0	0	0	0	0	0	0	0	0	0	0	WBGene00219290
AH6.2	0	0	0	0	0	0	0	0	0	0	0	0	0	0	0	0	0	0	0	0	WBGene00007080
AH6.3	0	0	0	0	0	0	0	0	0	0	0	0	0	0	0	0	0	0	0	0	WBGene00007081
AH6.4	0	0	0	0	0	0	0	0	0	0	0	0	0	0	0	0	0	0	0	0	WBGene00005027
AH6.5	4.07925	4.34641	8.78397	20.8887	46.3778	43.8562	41.9591	42.6278	46.1702	60.1347	3.38578	8.34471	12.5149	18.8342	48.1573	42.4641	38.9652	30.8094	49.1159	44.9445	WBGene00003231
AH6.6	0	0	0	0	0	0	0	0	0	0	0	0	0	0	0	0	0	0	0	0	WBGene00005028
AH6.7	0	0	0	0	0	0	0	0	0	0	0	0	0	0	0	0	0	0	0	0	WBGene00005029
AH6.8	0	0	0	0	0	0	0	0	0	0	0	0	0	0	0	0	0	0	0	0	WBGene00005030
AH9.1	0	0	0	0	0	0	0	0	0.94225	0	0	0	0	0	0	0	0	0	0	0	WBGene00014998
AH9.2	0	0	0	0	0	5.34146	17.1651	1.63953	6.59575	8.97533	0	0	0	0	1.40811	4.93769	2.85111	2.93423	0.963057	2.9963	WBGene00000797
AH9.3	0	0	0	0	0	3.93581	3.81446	4.9186	7.538	11.6679	0	0	0.446961	0	0.281622	5.92522	3.80149	8.80269	10.5936	10.487	WBGene00014999
AH9.4	0	0	0	0	0	0	0	0	0	0	0	0	0	0	0	0	0	0	0	0	WBGene00015000
AH9.6	0	0	0	0	0	0	0	0	0	0	0	0	0	0	0	0	0	0	0	0	WBGene00044701
AH9.7	0	0	0	0	0	0	0	0	0	0	0	0	0	0	0	0	0.950372	0	0	0	WBGene00175029
B0001.1	4.07925	14.7778	18.5439	23.3302	16.8841	14.3376	13.3506	22.9535	20.7295	24.6822	2.25718	10.6205	22.3481	17.2647	12.9546	11.3567	12.3548	8.80269	10.5936	11.9852	WBGene00003010
B0001.2	21.756	12.1699	16.5919	17.362	18.3802	16.3055	11.4434	9.83719	15.076	13.9118	13.5431	18.9653	21.9011	21.3455	25.346	15.8006	10.4541	5.86846	19.2611	17.9778	WBGene00007087
B0001.3	0	10.866	6.83198	11.6651	9.4038	8.99614	11.4434	4.9186	3.769	6.28273	4.51437	6.06888	10.7271	6.90588	6.4773	10.3691	5.70223	8.80269	6.7414	4.49445	WBGene00007088
B0001.4	13.5975	15.6471	19.1946	17.0907	15.6018	16.8678	9.53616	16.3953	21.6717	17.5019	22.5718	17.448	10.7271	20.0898	12.673	10.8629	19.0074	5.86846	5.77834	8.9889	WBGene00007089
B0001.5	2.7195	7.38889	5.85598	5.15435	5.55679	5.90372	11.4434	6.55813	0.94225	3.14137	4.51437	7.5861	8.93923	4.39465	4.50595	6.41899	4.75186	5.86846	2.88917	2.9963	WBGene00007090
B0001.6	0	0	0.325332	0	0	3.93581	9.53616	4.9186	10.3647	8.52656	0	0	0	0	0.844866	4.93769	8.55334	7.33557	10.5936	4.49445	WBGene00007091
B0001.7	6.79874	6.95425	8.45864	14.6492	13.6783	10.4018	1.90723	11.4767	14.1337	15.7068	14.6717	9.86193	7.59834	9.41711	16.0524	7.9003	6.6526	13.204	10.5936	2.9963	WBGene00007092
B0001.8	1.35975	6.51961	5.85598	7.59588	7.05285	7.02824	7.62893	8.19766	5.6535	14.8093	4.51437	10.6205	6.70442	7.21979	7.60379	6.91276	8.55334	2.93423	5.77834	5.9926	WBGene00007093
B0019.1	0	0	0	0	0	0	0	0	0	0	0	0	0	0	0	0	0	0	0	0	WBGene00000138
B0019.2	2.7195	2.1732	5.20532	3.79794	1.9235	2.53017	3.81446	1.63953	3.769	3.14137	1.12859	3.79305	4.02265	1.88342	4.50595	6.41899	4.75186	4.40134	4.81529	2.9963	WBGene00007094
B0024.1	0	0	0	0	0	0	0	0	0	0	0	0	0	0	0	0	0	0	0	0	WBGene00000722
B0024.10	13.5975	4.78105	12.688	17.6333	10.6861	8.99614	9.53616	11.4767	15.076	15.2581	6.77155	9.86193	12.9619	10.6727	13.2362	5.92522	13.3052	5.86846	4.81529	2.9963	WBGene00007100
B0024.11	13.5975	19.5588	7.80798	10.3087	10.6861	8.15275	15.2579	13.1163	11.307	4.93643	11.2859	18.2066	10.7271	10.0449	14.3627	11.8504	10.4541	5.86846	6.7414	2.9963	WBGene00007101
B0024.12	0	0	0.650665	0.542563	0.213723	0.281129	0	1.63953	0.94225	0.448767	2.25718	0	0	0	0.281622	0.493769	0	1.46711	0	0	WBGene00001646
B0024.13	1.35975	9.12746	10.4106	13.8353	14.5331	13.4942	9.53616	4.9186	15.076	12.1167	2.25718	11.3792	8.49227	5.65027	14.6443	14.8131	22.8089	17.6054	15.4089	10.487	WBGene00007102
B0024.14	0	0	0	0	0	0.281129	0	0	0	0	0	0	0	0.313904	0	0	0	0	0	0	WBGene00007103
B0024.15	0	0	0	0	0	0	0	0	0	0	0	0	0	0	0	0	0	0	0	0	WBGene00007104
B0024.2	0	0	0	0	0	0	0	0	0	0	0	0	0	0	0	0	0	0	0	0	WBGene00000723
B0024.3	0	0	0.325332	0	0	0	0	0	0	0	0	0	0	0	0	0	0	0	0	0	WBGene00007096
B0024.4	0	0	0	0	0	0	0	0	0	0	0	0	0	0	0	0	0	0	0	0	WBGene00007097
B0024.6	0	0	0	0	0	0	0	0	0	0	0	0	0	0	0	0	0	0	0	0	WBGene00001533
B0024.8	0	0	0	0	0	0	0	0	0.94225	0	0	0	0	0	0	0	0	0	0	0	WBGene00000491
B0024.9	20.3962	26.9477	25.7013	26.5856	22.2272	16.8678	9.53616	4.9186	10.3647	7.62903	20.3147	22.7583	24.1359	31.0765	21.1216	14.3193	15.2059	17.6054	11.5567	13.4833	WBGene00007099
B0025.1	1.35975	2.60785	4.22932	2.98409	3.41956	2.24904	0	6.55813	3.769	2.24383	1.12859	2.27583	3.12873	4.39465	1.40811	4.93769	0.950372	4.40134	2.88917	1.49815	WBGene00006932
B0025.2	21.756	9.12746	7.80798	11.1225	12.1822	12.3697	7.62893	11.4767	8.48025	13.463	3.38578	7.5861	9.38619	13.4979	10.42	8.39407	8.55334	8.80269	12.5197	25.4685	WBGene00000814
B0025.4	4.07925	4.34641	5.20532	7.59588	5.55679	6.18485	7.62893	1.63953	6.59575	7.62903	2.25718	3.79305	6.25746	5.02246	5.91406	4.44392	5.70223	2.93423	3.85223	4.49445	WBGene00015001
B0025.5	0	0	0	0	0	0	0	0	0	0	0	0	0	0	0	0	0	0	0	0	WBGene00194700
B0034.1	0	0	0	0	0	0	0	0	0	0	0	0	0	0	0	0	0	0	0	0	WBGene00015002
B0034.2	0	0	0	0	0	0	0	0	0	0	0	0	0	0	0	0	0	0	0	0	WBGene00015003
B0034.3	1.35975	0	0.650665	0.813844	0.427445	0.843388	7.62893	6.55813	6.59575	2.6926	0	0	0	0.313904	0.563244	2.46884	1.90074	8.80269	6.7414	8.9889	WBGene00000403
B0034.4	0	0	0	0	0	0	0	0	0	0	0	0	0	0	0	0	0	0	0	0	WBGene00015004
B0034.5	0	0	0	0	0	0	0	0	0	0	0	0	0	0	0	0	0	0	0	0	WBGene00015005
B0034.7	0	0	0	0	0	0	0	0	0	0	0	0	0.446961	0	0	0	0	0	0	1.49815	WBGene00044394
B0035.1	24.4755	22.6013	26.6773	32.5538	29.28	26.4262	34.3302	16.3953	36.7477	36.7989	22.5718	30.3444	28.6055	21.3455	27.3173	41.4766	32.3126	19.0725	21.1873	23.9704	WBGene00007105
B0035.10	0	0	0.650665	1.62769	2.56467	2.53017	0	0	0	0.448767	1.12859	0	0.893923	0.627807	0.563244	0.987537	0.950372	0	0	1.49815	WBGene00001919
B0035.11	6.79874	11.3007	12.688	12.7502	17.9527	13.7753	17.1651	8.19766	9.4225	19.297	14.6717	12.8964	17.4315	12.5561	18.8687	16.2944	18.0571	8.80269	8.66751	4.49445	WBGene00007110
B0035.12	20.3962	23.036	14.3146	19.8035	22.4409	13.4942	19.0723	19.6744	11.307	14.8093	18.0575	9.10332	12.068	16.6369	15.7708	10.3691	9.50372	16.1383	12.5197	19.4759	WBGene00007111
B0035.13	0	0	0	0.271281	0	0	1.90723	0	0	0	0	0	0.446961	0	0.281622	0	0	0	0	0	WBGene00007112
B0035.14	9.51824	5.65033	9.75997	11.3938	11.9685	11.2452	5.7217	4.9186	8.48025	10.7704	4.51437	3.03444	12.5149	5.65027	11.5465	14.8131	6.6526	10.2698	13.4828	10.487	WBGene00001019
B0035.15	17.6767	11.3007	9.75997	14.1066	10.045	12.3697	5.7217	11.4767	9.4225	10.7704	12.4145	9.86193	13.8558	15.0674	11.5465	10.8629	9.50372	16.1383	7.70446	13.4833	WBGene00007113
B0035.16	0	2.60785	0.975997	2.17025	1.70978	0.843388	0	1.63953	3.769	2.24383	1.12859	4.55166	3.12873	0.941711	1.68973	0	0	0	0	0	WBGene00007114
B0035.18	8.15849	3.47713	3.25332	2.17025	2.7784	1.96791	0	1.63953	0	3.59013	5.64296	3.03444	2.23481	4.39465	2.5346	5.43146	5.70223	1.46711	3.85223	1.49815	WBGene00044290
B0035.2	0	1.73856	4.22932	4.06922	4.27445	6.18485	3.81446	1.63953	3.769	7.18027	3.38578	5.31027	3.12873	3.76684	4.78757	4.93769	4.75186	5.86846	5.77834	1.49815	WBGene00001020
B0035.3	14.9572	15.2124	15.616	15.1918	18.8076	16.3055	13.3506	8.19766	9.4225	19.297	10.1573	15.1722	15.6436	15.0674	14.926	17.2819	20.9082	7.33557	14.4459	19.4759	WBGene00007106
B0035.4	20.3962	17.3856	17.5679	14.3779	12.8234	11.8074	11.4434	8.19766	11.307	11.6679	21.4432	14.4136	16.9845	25.7401	18.0238	10.3691	7.60297	14.6711	7.70446	8.9889	WBGene00007107
B0035.5	4.07925	5.21569	9.75997	6.23947	6.41168	6.46598	1.90723	6.55813	2.82675	9.4241	4.51437	6.82749	8.49227	5.65027	7.88541	3.95015	3.80149	0	7.70446	10.487	WBGene00007108
B0035.6	39.4327	26.9477	29.9306	32.2825	35.9054	28.6752	36.2374	40.9883	42.4012	54.3008	18.0575	33.3788	33.0751	26.9957	41.9617	41.4766	46.5682	44.0134	49.1159	41.9482	WBGene00007109
B0035.7	0	1.30392	0.650665	0.813844	1.49606	1.68678	1.90723	1.63953	0	2.24383	1.12859	0	1.78785	1.25561	1.12649	0	3.80149	0	1.92611	0	WBGene00001921
B0035.8	2.7195	4.34641	6.83198	8.40972	7.69402	7.30937	7.62893	13.1163	9.4225	8.0778	2.25718	2.27583	5.36354	5.33636	6.75893	4.93769	3.80149	0	1.92611	1.49815	WBGene00001922
B0035.9	0	0	1.95199	2.98409	2.7784	2.81129	0	1.63953	2.82675	4.48767	1.12859	1.51722	1.34088	2.19733	1.40811	0	0	0	0.963057	1.49815	WBGene00001920
B0041.1	0	0	0	0	0	0	0	0	0	0	0	0	0	0	0	0	0	0	0	0	WBGene00015006
B0041.11	0	0.434641	0	0.271281	0	0.281129	1.90723	0	0	1.79507	0	0	0	0	0	1.97507	3.80149	1.46711	1.92611	2.9963	WBGene00206362
B0041.2	2.7195	2.1732	2.27733	1.08513	1.9235	0.843388	0	0	1.8845	0.897533	0	0.75861	1.34088	0.941711	2.5346	1.97507	0	1.46711	3.85223	0	WBGene00015007
B0041.3	0	0	0	0.271281	0	1.96791	1.90723	1.63953	0	1.3463	0	0	0	0	0.844866	0.987537	0.950372	0	0.963057	0	WBGene00015008
B0041.4	489.51	319.461	265.146	215.94	181.451	178.798	230.775	83.6162	67.842	26.4772	514.638	386.891	322.259	267.132	192.348	174.794	116.896	23.4738	22.1503	16.4796	WBGene00004415
B0041.5	0	3.47713	2.92799	5.96819	3.41956	5.90372	7.62893	6.55813	4.71125	6.28273	0	4.55166	12.068	6.27807	10.42	7.40653	6.6526	4.40134	3.85223	8.9889	WBGene00015009
B0041.6	0	0.869282	0	0	0	0.281129	1.90723	1.63953	0	0	0	0.75861	0	0	0	0.493769	0	0	0	0	WBGene00015010
B0041.7	13.5975	16.951	17.5679	13.0215	13.6783	15.4621	24.794	3.27906	12.2492	12.1167	15.8003	19.7239	14.7497	17.2647	19.1503	19.257	10.4541	14.6711	19.2611	5.9926	WBGene00006961
B0041.8	10.878	16.951	19.1946	25.5004	23.9369	22.7715	17.1651	21.3139	19.7872	26.4772	12.4145	15.9308	25.0298	16.323	16.0524	18.7632	7.60297	14.6711	9.63057	10.487	WBGene00015011
B0047.1	4.07925	1.30392	0.325332	0.271281	0.213723	0.281129	0	0	0	0	0	0	0	0	0	0.493769	0	0	0	0	WBGene00015012
B0047.2	1.35975	1.73856	0	0.271281	1.06861	1.12452	1.90723	0	0	0.448767	0	1.51722	0.446961	0	0.281622	0	0	0	0	0	WBGene00015013
B0047.3	6.79874	1.73856	0.975997	1.89897	1.9235	1.40565	0	0	0	0	1.12859	0.75861	3.12873	2.19733	2.25298	1.48131	0	0	0	0	WBGene00015014
B0047.4	0	0	0	0	0.213723	0	0	0	0	0	0	0	0	0	0	0.493769	0	0	0	0	WBGene00015015
B0198.1	0	0	0	0.271281	0	0.281129	0	0	0	0	0	0	0	0	0	0	1.90074	0	0	0	WBGene00006646
B0198.2	0	0	0	0	0	0	0	0	0	0	0	0	0	0	0	0	0	0	0	0	WBGene00007115
B0198.3	0	0	0	0	0	0	1.90723	1.63953	0	0	0	0	0	0	0	0	0	0	0	0	WBGene00007116
B0205.1	16.317	10.4314	10.4106	11.3938	11.9685	9.83953	13.3506	11.4767	5.6535	12.5655	11.2859	7.5861	12.068	12.5561	14.926	16.2944	16.1563	10.2698	10.5936	20.9741	WBGene00015017
B0205.10	0	0	0	0	0	0	0	0	0	0	0	0	0	0	0	0	0	0	0	0	WBGene00015024
B0205.11	38.073	34.3366	38.0639	41.7773	32.2721	16.0244	20.9796	8.19766	15.076	13.0142	32.7292	24.2755	36.2039	37.3545	27.5989	10.3691	10.4541	7.33557	9.63057	8.9889	WBGene00015025
B0205.12	4.07925	3.04249	8.13331	4.61178	4.91562	2.81129	1.90723	1.63953	0.94225	2.24383	3.38578	3.03444	4.46961	1.88342	1.97135	1.97507	1.90074	0	0	0	WBGene00044413
B0205.13	0	0	0	0	0	0	0	0	0	0	0	0	0	0.313904	0	0	0	0	0	0	WBGene00044644
B0205.14	0	0	0	0	0	0	0	0	0	0	0	0	0	0	0	0	0	0	0	0	WBGene00044646
B0205.2	0	0	0	0	0	0	0	0	0	0	0	0	0	0	0	0	0	0	0	0	WBGene00015018
B0205.3	48.951	49.9837	47.8239	48.8306	50.0111	39.077	34.3302	40.9883	47.1125	56.5446	38.3721	40.965	37.0978	62.1529	51.5368	56.2896	69.3771	70.4215	46.2267	91.3871	WBGene00004466
B0205.4	0	0	0	0	0	0	0	0	0	0	0	0	0	0	0	0	0	0	0	0	WBGene00015019
B0205.5	1.35975	0	0	0	0	0	0	0	0	0	0	0	0	0	0	0	0	0	0	0	WBGene00015020
B0205.6	13.5975	29.1209	16.2666	15.1918	14.9606	11.5263	9.53616	9.83719	12.2492	8.52656	6.77155	12.8964	10.2801	17.5786	16.0524	11.3567	8.55334	8.80269	13.4828	10.487	WBGene00015021
B0205.7	36.7132	38.683	29.9306	30.6548	29.9212	19.9602	11.4434	32.7906	24.4985	32.3112	42.8865	25.0341	25.9238	46.4578	36.3292	28.1448	21.8585	29.3423	33.707	41.9482	WBGene00002191
B0205.8	10.878	13.0392	14.3146	10.8513	8.33519	5.90372	11.4434	3.27906	5.6535	10.7704	11.2859	10.6205	9.83315	10.3588	10.9833	7.9003	15.2059	13.204	10.5936	11.9852	WBGene00015022
B0205.9	5.43899	2.60785	5.85598	7.59588	5.55679	7.5905	1.90723	6.55813	9.4225	12.1167	2.25718	5.31027	6.25746	4.08075	6.4773	10.3691	7.60297	2.93423	7.70446	4.49445	WBGene00015023
B0207.1	0	0	0	0	0	0	0	0	0	0	0	0	0	0	0	0	0	0	0	0	WBGene00015026
B0207.10	0	0	0	0	0	0	0	0	0	0	0	0	0	0	0	0	0	0	0	0	WBGene00015033
B0207.11	0	0	0	0	0	0	0	0	0	0	0	0	0	0	0	0	0	0	0	0	WBGene00015034
B0207.12	0	0	0	0	0	0	0	0	0	0	0	0	0	0	0	0	0	0	0	0	WBGene00000232
B0207.2	0	0	0	0	0	0	0	0	0	0	0	0	0	0	0	0	0	0	0	0	WBGene00015027
B0207.3	0	0	0	0	0	0	0	0	0	0	0	0	0	0	0	0	0	0	0	0	WBGene00001676
B0207.4	9.51824	8.69282	16.2666	14.6492	17.5253	15.7433	30.5157	19.6744	16.9605	24.2334	10.1573	12.1378	11.174	9.41711	15.7708	11.8504	20.9082	19.0725	24.0764	28.4648	WBGene00000099
B0207.5	0	0	0	0.271281	0	0	0	0	0	0	0	0	0	0	0	0	0	0	0	0	WBGene00015028
B0207.6	4.07925	8.69282	6.18131	5.69691	6.19796	7.5905	9.53616	1.63953	11.307	10.7704	5.64296	9.86193	11.174	6.90588	4.78757	6.41899	8.55334	2.93423	5.77834	4.49445	WBGene00015029
B0207.7	0	0	0	0	0	0	0	0	0	0	0	0	0	0	0	0	0	0	0	0	WBGene00015030
B0207.8	0	0	0	0	0	0	0	0	0	0	0	0	0	0	0	0	0	0	0	0	WBGene00015031
B0207.9	0	0	0	0	0	0	0	0	0	0	0	0	0	0	0	0	0	0	0	0	WBGene00015032
B0212.1	0	0	0	0	0	0	0	0	0	0	0	0	0	0	0	0	0	0	0	0	WBGene00015035
B0212.2	0	0	0	0	0	0	0	0	0	0	0	0	0	0	0	0	0	0	0	0	WBGene00015036
B0212.3	0	0	0.325332	0	0.641168	1.40565	0	1.63953	0	1.3463	0	0	0.446961	0.313904	0.844866	2.46884	1.90074	0	1.92611	0	WBGene00015037
B0212.4	0	0	0	0	0	0	0	1.63953	0	0	0	1.51722	0	0.627807	0	0	0	0	0	0	WBGene00015038
B0212.5	0	0	0	0	0	0	0	0	0	0	0	0	0	0	0	0	0	0	0	0	WBGene00003889
B0212.6	0	0	0	0	0	0	0	0	0	0	0	0	0	0	0	0	0	0	0	0	WBGene00044111
B0213.10	0	0	0	0	0	0	0	0	0	0	0	0	0	0	0	0	0	0	0	0	WBGene00015040
B0213.11	0	0	0	0	0	0	0	0	0	0	0	0	0	0	0	0	0	0	0	0	WBGene00015041
B0213.12	0	0	0	0	0	0	0	0	0	0	0	0	0	0	0	0	0	0	0	0	WBGene00015042
B0213.14	0	0	0	0	0	0	0	0	0	0	0	0	0	0	0	0	0	0	0	0	WBGene00015043
B0213.15	0	0	0	0	0	0	0	0	0	0	0	0	0	0	0	0	0	0	0	0	WBGene00015044
B0213.16	0	0	0	0	0	0	0	0	0	0	0	0	0	0	0	0	0	0	0	0	WBGene00015045
B0213.17	0	0	0	0	0	0	0	0	0	0	0	0	0	0	0	0	0	0	0	0	WBGene00015046
B0213.2	0	0	0	0	0	0	0	0	0.94225	0	0	0.75861	0	0	0	0	0	0	0	0	WBGene00003765
B0213.3	0	0	0	0	0	0	0	0	0	0.448767	0	0	0	0	0	0	0	0	0	0	WBGene00003766
B0213.4	0	0	0	0	0	0	0	0	0	0	0	0	0	0	0	0	0	0	0	0	WBGene00003767
B0213.5	0	0	0	0.271281	0	0.281129	0	0	0	0	0	0	0	0	0	0	0	0	0	0	WBGene00003768
B0213.6	0	0.434641	0.325332	0	0.213723	0	0	0	0.94225	0	0	0.75861	0.446961	0	0	0.493769	0	1.46711	0	0	WBGene00003769
B0213.7	0	0	0	0	0	0	0	0	0	0	0	0	0	0	0	0	0	0	0	0	WBGene00006142
B0213.8	0	0	0	0	0	0	0	0	0	0	0	0	0	0	0	0	0	0	0	0	WBGene00006141
B0213.9	0	0	0	0	0	0	0	0	0	0	0	0	0	0	0	0	0	0	0	0	WBGene00006274
B0218.1	0	0	0.650665	0	0	0.562259	3.81446	3.27906	1.8845	0.448767	0	0	0	0	0.563244	3.45638	3.80149	0	0	0	WBGene00015047
B0218.2	0	0	0	0	0	0	0	0	0	0	0	0	0	0	0.281622	0.493769	0	0	0	1.49815	WBGene00015048
B0218.3	0	0	0	0	0	1.12452	3.81446	0	0	0.897533	0	0	0	0	0	0.987537	0.950372	0	1.92611	0	WBGene00004055
B0218.5	0	0	0	0	0	0	0	0	0	0	0	0	0	0	0	0	0	0	0	0	WBGene00015049
B0218.6	0	0	0	0	0	0	0	0	0	0	0	0	0	0	0	0	0	0	0	0	WBGene00015050
B0218.7	0	0	0	0	0	0	0	0	0	0	0	0	0	0	0	0	0	0	0	0	WBGene00015051
B0218.8	0	0	0	0	0	0	0	0	0	0	0	0	0	0	0	0	0	0	0	0	WBGene00015052
B0222.1	0	0	0	0	0	0	0	0	0	0	0	0	0	0	0	0	0	0	0	0	WBGene00015053
B0222.10	0	0	0	0	0	0	0	0	0	0	0	0	0	0	0	0	0	0	0	0	WBGene00015058
B0222.11	0	0	0	0	0	0	0	0	0	0	0	0	0	0	0	0	0	0	0	0	WBGene00044582
B0222.2	0	0	0	0	0	0	0	0	0	0	0	0	0	0	0	0	0	0	0	0	WBGene00015054
B0222.3	0	0	0	0	0	0	0	0	0	0	0	0	0	0	0	0	0	0	0	0	WBGene00015055
B0222.4	0	0	0	0	0	0	0	0	0	0	0	0	0	0	0	0	0	0	0	0	WBGene00006418
B0222.5	0	0	0	0	0	0	0	0	0	0	0	0	0	0	0	0	0	0	0	0	WBGene00015056
B0222.6	0	0	0	0	0	0	0	0	0	0	0	0	0	0	0	0	0	0	0	0	WBGene00000717
B0222.7	0	0	0	0	0	0	0	0	0	0	0	0	0	0	0	0	0	0	0	0	WBGene00000718
B0222.8	0	0	0	0	0	0	0	0	0	0	0	0	0	0	0	0	0	0	0	0	WBGene00000599
B0222.9	0	0	0	0	0	0	0	0	0	0	0	0	0	0	0	0	0	0	0	0	WBGene00015057
B0228.1	0	0	0	0	0	0	0	0	0	0	0	0	0	0	0	0	0	0	0	0	WBGene00015059
B0228.4	0	0	0	0	0.213723	0	0	0	0	0.897533	0	0	0	0.313904	0	0.987537	0	0	0.963057	1.49815	WBGene00015061
B0228.5	0	0	0	0	0	0	0	0	0	0	0	0	0	0	0	0	0	0	0	0	WBGene00015062
B0228.6	0	0	0	0	0	0	0	0	0	0	0	0	0	0	0	0	0	0	0	0	WBGene00015063
B0228.7	9.51824	15.2124	9.10931	8.95228	8.76263	5.34146	1.90723	1.63953	1.8845	1.79507	4.51437	12.1378	12.5149	8.1615	10.42	3.45638	0.950372	0	2.88917	2.9963	WBGene00015064
B0228.8	0	0	0	0	0	0	0	0	0	0	0	0	0	0	0	0	0	0	0	0	WBGene00015065
B0228.9	0	0	0	0	0	0	0	0	0	0	0	0	0	0	0	0	0	0	0	0	WBGene00015066
B0238.1	0	0	0	0	0	0.281129	1.90723	0	0	0	0	0	0	0	0	0.493769	0	0	0	0	WBGene00015067
B0238.10	5.43899	5.65033	5.85598	6.51075	4.91562	6.46598	3.81446	8.19766	6.59575	11.6679	3.38578	7.5861	7.59834	4.39465	6.19568	5.92522	6.6526	4.40134	7.70446	13.4833	WBGene00015074
B0238.11	55.7497	41.2909	39.3652	50.4583	41.8897	45.8241	41.9591	22.9535	36.7477	52.0569	33.8578	34.8961	42.9083	30.1348	27.0357	34.07	29.4615	38.145	14.4459	26.9667	WBGene00015075
B0238.12	0	0	0	0	0	0	0	0	0	0	0	0	0	0	0	0	0	0	0	0	WBGene00015076
B0238.13	0	0	0	0	0	0.281129	3.81446	0	0	0	0	0	0	0	0	0.493769	0	0	0	0	WBGene00015077
B0238.15	0	0	0	0	0	0.281129	0	0	0	0.448767	0	0	0	0	0	0.493769	0	0	0	0	WBGene00044537
B0238.3	0	0	0	0	0	0	0	0	0	0	0	0	0	0	0	0	0	0	0	0	WBGene00015068
B0238.5	0	0	0	0	0	0	0	0	0	0	0	0	0	0	0	0	0	0	0	0	WBGene00015069
B0238.6	0	0	0	0	0	0	0	0	0	0	0	0	0	0	0	0	0	0	0	0	WBGene00015070
B0238.7	0	0	0	0	0	0	0	0	0	0	0	0	0	0	0	0	0	0	0	0	WBGene00015071
B0238.8	0	0	0	0	0	0	0	0	0	0	0	0	0	0	0	0	0	0	0	0	WBGene00015072
B0238.9	8.15849	9.5621	19.5199	23.6015	25.6467	16.5866	11.4434	14.7558	18.845	26.0285	10.1573	14.4136	21.9011	22.2872	31.26	20.2445	16.1563	13.204	17.335	16.4796	WBGene00015073
B0240.1	0	0	0	0	0	0	0	0	0	0	0	0	0	0	0	0	0	0	0	0	WBGene00004359
B0240.2	0	0	0	0	0	0	0	0	0	0	0	0	0	0	0	0	0	0	0	0	WBGene00007117
B0240.3	0	0	0	0	0	0	0	0	0	0	0	0	0	0	0	0	0	0	0	0	WBGene00000907
B0240.4	13.5975	21.732	20.8213	16.2769	26.0742	29.5186	24.794	26.2325	37.69	27.8235	12.4145	22.7583	11.621	16.9508	26.1908	26.1697	25.66	33.7436	39.4853	37.4537	WBGene00007118
B0244.10	0	0	0	0	0	0	0	0	0	0	0	0	0	0	0	0	0	0	0	0	WBGene00015085
B0244.11	0	0	0	0	0	0	0	0	0	0	0	0	0	0	0	0	0	0	0	0	WBGene00015086
B0244.15	0	0	0	0	0	0	0	0	0	0	0	0	0	0	0	0	0	0	0	0	WBGene00206513
B0244.2	0	0	0	0	0	0	0	0	0	0	0	0	0	0	0	0	0	0	0	0	WBGene00002048
B0244.4	0	0	0	0	0	0	0	0	0	0	0	0	0	0	0	0	0	0	0	0	WBGene00015079
B0244.5	0	0	0	0	0	0	0	0	0	0	0	0	0	0	0	0	0	0	0	0	WBGene00015080
B0244.6	1.35975	0	0	0	0	0	0	0	0	0	0	0	0	0	0	0	0	0	0	0	WBGene00015081
B0244.7	0	0	0	0	0	0	0	0	0	0	0	0	0	0	0	0	0	0	0	0	WBGene00015082
B0244.8	12.2377	7.82354	27.6532	56.6978	104.938	107.391	127.785	90.1743	143.222	128.796	6.77155	16.6894	51.8475	61.5251	107.298	121.467	183.422	189.258	174.313	121.35	WBGene00015083
B0244.9	0	0	0	0	0	0	0	0	0	0	0	0	0	0	0	0	0	0	0	0	WBGene00015084
B0250.1	451.437	324.677	272.954	232.759	186.794	193.698	194.538	91.8138	85.7447	23.3359	619.597	424.063	332.986	277.177	214.596	200.47	140.655	57.2175	23.1134	10.487	WBGene00004413
B0250.10	0	0	0	0	0	0	0	0	0	0	0	0	0	0	0	0	0	0	0	0	WBGene00007127
B0250.18	0	0	0	0	0	0	0	0	0	0	0	0	0	0	0	0	0	0	0	0	WBGene00206505
B0250.2	0	0	0	0	0	0	0	0	0	0	0	0	0	0	0	0	0	0	0	0	WBGene00007119
B0250.5	8.15849	10.866	13.664	17.362	17.739	11.8074	13.3506	11.4767	17.9027	18.3994	7.90014	6.82749	9.38619	17.8925	14.6443	15.8006	15.2059	23.4738	17.335	19.4759	WBGene00007122
B0250.6	0	0	0	0	0	0	0	0	0	0	0	0	0	0	0	0	0	0	0	0	WBGene00007123
B0250.8	19.0365	16.951	17.8933	10.0374	11.541	14.3376	5.7217	0	0	2.24383	22.5718	5.31027	13.4088	8.7893	2.25298	3.95015	0.950372	0	0	2.9963	WBGene00007125
B0250.9	0	0	0	0.813844	0.427445	0	0	0	0.94225	0	0	0	0	0	0	0.493769	0	0	0	0	WBGene00007126
B0252.1	1.35975	0	0	0	0	0	0	0	0	0	0	0	0	0	0	0	0	0	0	0	WBGene00015087
B0252.2	0	0	0	0.271281	0	0	0	0	0	0	0	0	0.446961	0	0	1.48131	0	0	0	1.49815	WBGene00000211
B0252.3	0	0	0	0	0	0.281129	3.81446	0	0.94225	0.448767	0	0	0	0	0	0	0.950372	1.46711	0.963057	2.9963	WBGene00015088
B0252.4	2.7195	9.5621	8.45864	9.76613	12.1822	10.1207	7.62893	8.19766	6.59575	10.7704	2.25718	5.31027	9.38619	9.10321	7.88541	11.8504	15.2059	10.2698	6.7414	5.9926	WBGene00000886
B0252.5	0	0	0	0	0	0	0	0	0	0	0	0	0	0	0	0	0	0	0	0	WBGene00015089
B0252.8	0	0	0	0	0	0	0	0	0	0	0	0	0	0	0	0	0	0	0	0	WBGene00044615
B0261.1	5.43899	8.69282	7.15731	7.59588	8.97635	5.90372	0	3.27906	5.6535	11.6679	5.64296	3.79305	8.0453	8.4754	8.16704	12.838	5.70223	4.40134	12.5197	8.9889	WBGene00015091
B0261.2	8.15849	4.34641	9.43464	6.51075	7.26657	7.5905	13.3506	16.3953	5.6535	11.2192	9.02873	6.82749	6.25746	7.84759	9.85677	5.92522	9.50372	7.33557	20.2242	10.487	WBGene00002583
B0261.4	6.79874	10.866	9.10931	5.96819	6.19796	5.62259	0	6.55813	0.94225	1.79507	4.51437	5.31027	7.15138	10.0449	6.75893	5.92522	6.6526	1.46711	7.70446	0	WBGene00015092
B0261.5	0	0	0	0	0	0	0	0	0	0	0	0	0	0	0	0	0	0	0	0	WBGene00015093
B0261.6	0	0	0	0	0	0	0	0	0	0	0	0	0	0	0	0	0	0	0	0	WBGene00015094
B0261.7	65.2679	69.1079	79.0558	84.6398	76.7265	67.4711	49.588	77.058	90.456	74.4952	74.4871	72.8266	83.1348	44.5743	53.5082	42.4641	49.4193	73.3557	44.3006	29.963	WBGene00015095
B0261.8	0	0.434641	0.325332	0	1.06861	2.24904	7.62893	0	1.8845	1.3463	0	0	0.446961	0.941711	0.844866	5.92522	0	0	0.963057	5.9926	WBGene00015096
B0261.9	0	0	0	0	0	0	0	0	0	0	0	0	0	0	0	0	0	0	0	0	WBGene00195057
B0272.1	0	0	0.325332	0	0	0	0	0	0	0	0	0	0	0	0	0	0	0	0	0	WBGene00006538
B0272.2	0	0	0	0	0	0.562259	3.81446	0	0	1.79507	0	0	0	0	0.281622	0.493769	0	0	0	0	WBGene00007128
B0272.3	2.7195	0	0.325332	0.271281	0.213723	9.27727	13.3506	9.83719	6.59575	13.463	0	0	0	0	3.09784	12.838	13.3052	14.6711	16.372	25.4685	WBGene00007129
B0272.4	0	0	0	0	0	0	0	0	0	0	0	0	0	0	0	0	0	0	0	0	WBGene00007130
B0273.1	0	0	0	0	0	0	0	1.63953	0	0	0	0	0	0	0	0	0	0	0	0	WBGene00015097
B0273.115	0	0.434641	0	0	0.213723	0	0	0	0	0	0	0.75861	0	0	0	0	0	0	0	0	WBGene00206473
B0273.2	9.51824	7.82354	14.9653	25.7717	36.5466	28.3941	24.794	27.8721	26.383	32.3112	2.25718	18.9653	18.3254	23.2289	30.4152	29.1323	35.1637	38.145	26.0025	28.4648	WBGene00004243
B0273.3	12.2377	13.4739	6.83198	4.88306	4.06073	2.53017	0	0	2.82675	3.14137	13.5431	8.34471	5.36354	6.27807	4.50595	3.45638	0.950372	1.46711	1.92611	0	WBGene00015098
B0273.4	0	0	1.30133	0.542563	0	0.281129	1.90723	0	0	2.6926	1.12859	0	0.893923	0.313904	0.844866	0.987537	0.950372	0	3.85223	10.487	WBGene00006745
B0280.1	9.51824	9.5621	10.0853	16.8194	15.388	14.6187	5.7217	8.19766	18.845	15.2581	13.5431	10.6205	8.49227	10.6727	10.42	10.8629	9.50372	17.6054	7.70446	4.49445	WBGene00015099
B0280.10	4.07925	1.30392	7.48264	8.95228	4.91562	4.7792	3.81446	6.55813	2.82675	2.24383	3.38578	6.06888	5.8105	3.13904	4.78757	2.46884	4.75186	0	4.81529	4.49445	WBGene00015105
B0280.11	0	0	0	0	0	0	0	0	0	0	0	0	0	0	0	0	0	0	0	0	WBGene00015106
B0280.12	0	0	0	0	0	0.281129	1.90723	0	0	0	0	0	0	0	0	0	0	0	0	0	WBGene00001613
B0280.13	0	0	0	0	0	0	0	0	0	0	0	0	0	0	0	0	0	0	0	0	WBGene00015107
B0280.17	0	0	0	0	0	0	0	0	0	0	0	0	0	0	0	0	0	0	0	0	WBGene00044674
B0280.2	0	0	0	0	0	0	0	0	0	0	0	0	0	0	0	0	0	0	0	0	WBGene00015100
B0280.3	40.7925	36.9445	46.5225	55.3414	55.9953	43.0128	32.4229	37.7092	47.1125	27.3748	29.3434	45.5166	49.6127	57.4444	50.6919	38.514	43.7171	54.2832	23.1134	23.9704	WBGene00015101
B0280.4	0	0	0	0	0	0	0	0	0	0	0	0	0	0	0	0	0	0	0	0	WBGene00003845
B0280.5	36.7132	20.8628	71.2478	161.684	174.184	202.975	410.055	354.139	369.362	296.635	22.5718	47.7924	126.49	155.068	196.29	262.191	426.717	491.483	452.637	379.032	WBGene00015102
B0280.7	0	0	0	0	0	0	0	0	0	0	0	0	0	0	0	0	0	0	0	0	WBGene00015103
B0280.8	0	0	0.325332	0	0	7.5905	9.53616	3.27906	9.4225	6.7315	0	0	0.446961	0.627807	0.563244	7.40653	3.80149	7.33557	5.77834	7.49075	WBGene00003609
B0280.9	6.79874	7.82354	7.15731	5.96819	7.48029	7.5905	9.53616	8.19766	4.71125	11.2192	2.25718	2.27583	5.36354	7.21979	8.44866	10.3691	6.6526	2.93423	5.77834	2.9963	WBGene00015104
B0281.1	0	0	0	0	0	0	0	0	0	0	0	0	0	0	0	0	0	0	0	0	WBGene00015108
B0281.3	0	0	0	0	0	0	0	0	0	0	0	0	0	0	0	0	0	0	0	0	WBGene00015110
B0281.4	0	0	0	0	2.13723	5.90372	5.7217	0	0	0	0	0	0	0	2.5346	0.987537	0	0	0	0	WBGene00015111
B0281.5	0	0	0.650665	0.271281	0	0	0	0	0.94225	2.24383	0	0	0	0	0	0.493769	0.950372	0	0	1.49815	WBGene00015112
B0281.6	0	0	0	0	0	0	0	0	0	0	0	0	0	0	0	0	0	0	0	0	WBGene00015113
B0281.8	0	0	0	0	0	0	0	0	0	0	0	0	0	0	0	0	0	0	0	0	WBGene00015114
B0284.1	0	0	0	0	0	0	0	0	0	0	0	0	0	0	0	0	0	0	0	0	WBGene00007131
B0284.2	0	0	0	0	0	0	0	0	0	0	0	0	0	0	0	0	0	0	0	0	WBGene00007132
B0284.3	0	0	0	0	0	0.843388	0	0	0	0	0	0	0	0	0.281622	1.97507	0	0	0	0	WBGene00007133
B0284.4	0	0	0	0	0	0	0	0	0	0	0	0	0	0	0	0	0	0	0	0	WBGene00007134
B0285.1	4.07925	5.21569	7.48264	7.05331	4.06073	3.09242	1.90723	3.27906	8.48025	4.48767	1.12859	3.03444	4.02265	5.02246	3.66108	7.40653	2.85111	5.86846	0.963057	10.487	WBGene00007135
B0285.10	0	0	0	0	0	0	0	0	0	0	0	0	0	0	0	0	0	0	0	0	WBGene00000513
B0285.3	0	8.69282	7.15731	4.3405	5.12934	4.7792	5.7217	8.19766	12.2492	9.4241	9.02873	5.31027	5.8105	5.02246	7.32217	8.39407	8.55334	4.40134	5.77834	7.49075	WBGene00007136
B0285.4	5.43899	6.51961	8.13331	7.3246	6.83913	9.5584	7.62893	1.63953	6.59575	4.93643	7.90014	4.55166	4.02265	5.96417	5.91406	4.44392	3.80149	4.40134	7.70446	4.49445	WBGene00007137
B0285.5	9.51824	6.51961	15.9413	17.362	17.9527	19.6791	22.8868	19.6744	27.3252	22.4383	6.77155	11.3792	10.7271	12.5561	16.6157	22.2196	10.4541	42.5463	28.8917	32.9593	WBGene00002003
B0285.6	0	0	0	0	0	0	0	0	0	0	0	0	0	0	0	0	0	0	0	0	WBGene00007138
B0285.7	0	0	0	0	0	0.281129	0	0	0.94225	0.897533	0	0	0	0	0	0.493769	0	0	0.963057	0	WBGene00007139
B0285.8	0	0	0	0	0	0.281129	0	0	0.94225	0	0	0	0	0	0	0.987537	1.90074	5.86846	0	0	WBGene00000511
B0285.9	0	0	0	0	0	1.12452	0	1.63953	3.769	3.59013	0	0	0	0	0.563244	6.41899	5.70223	1.46711	0.963057	4.49445	WBGene00000512
B0286.1	0	0	0.650665	0	0.213723	0.281129	0	0	0	0	0	0	0	0.313904	0	0.493769	0	1.46711	0	1.49815	WBGene00015115
B0286.2	0	0	0	0	0	0	0	0	0	0	0	0	0	0	0	0	0	0	0	0	WBGene00002252
B0286.3	0	0	0	0.271281	0.213723	0	1.90723	0	0	0.897533	0	0	0	0	0.281622	0	0.950372	0	1.92611	1.49815	WBGene00015116
B0286.4	38.073	24.3399	40.9919	39.6071	66.4678	41.8883	28.6085	45.9069	53.7082	41.7353	22.5718	23.5169	26.8177	39.8658	56.0428	44.9329	39.9156	45.4806	51.042	50.9371	WBGene00003825
B0286.5	0	0	0	0	0	0	0	0	0	0	0	0	0	0	0	0	0	0	0.963057	0	WBGene00001438
B0286.6	0	0	0	0	0	0	0	0	0	0	0	0	0	0	0	0	0	0	0	0	WBGene00023425
B0294.1	0	0	0	0	0	0	0	0	0	0	0	0	0	0	0	0	0	0	0	0	WBGene00015117
B0294.3	0	0	0	0	0	0	0	0	0	0	0	0	0	0	0	0	0	0	0	0	WBGene00015118
B0302.1	0	0	0.325332	0	0	2.24904	5.7217	3.27906	0.94225	3.59013	2.25718	0	0	0	1.12649	5.92522	3.80149	1.46711	4.81529	1.49815	WBGene00002207
B0302.2	0	0	0	0	0	0	0	0	0	0	0	0	0	0	0	0	0	0	0	0	WBGene00015119
B0302.4	0	0	0	0	0	0	0	0	0	0	0	0	0	0	0	0	0	0	0	0	WBGene00015121
B0302.5	0	0	0	0	0	0	0	0	0	0	0	0	0	0	0	0	0.950372	1.46711	0	1.49815	WBGene00015122
B0303.11	0	0	0	0	0	0	0	0	0	0	0	0	0	0	0	0	0	0	0	0	WBGene00015131
B0303.14	0	0	0	0	0	0	1.90723	1.63953	2.82675	4.93643	0	0	0	0	0	0	4.75186	2.93423	2.88917	1.49815	WBGene00015132
B0303.15	8.15849	15.2124	7.15731	9.76613	10.2587	8.71501	7.62893	3.27906	9.4225	12.1167	15.8003	9.10332	10.2801	11.3005	7.60379	7.40653	11.4045	4.40134	3.85223	10.487	WBGene00015133
B0303.16	0	0	0	0	0	0	0	0	0	0	0	0	0	0	0	0	0	0	0	0	WBGene00044678
B0303.2	0	0.434641	0	0	0.641168	0.281129	0	0	0.94225	0	0	0	0.446961	0.313904	0.281622	0.493769	0	0	0	0	WBGene00015124
B0303.3	12.2377	11.3007	12.3626	16.2769	29.9212	27.5507	22.8868	21.3139	24.4985	26.4772	7.90014	13.655	16.0906	10.6727	19.9952	20.2445	28.5111	16.1383	33.707	29.963	WBGene00015125
B0303.4	4.07925	4.34641	8.45864	4.88306	5.12934	4.7792	9.53616	8.19766	3.769	9.4241	4.51437	8.34471	6.25746	3.45294	6.19568	5.92522	5.70223	7.33557	0.963057	4.49445	WBGene00015126
B0303.7	0	0.434641	1.30133	0	0	1.96791	3.81446	6.55813	2.82675	6.28273	0	0	0	0	0.281622	5.92522	0.950372	11.7369	2.88917	1.49815	WBGene00015128
B0303.8	0	0	0	0	0	0	0	0	0	0	0	0	0	0	0	0	0	0	0	0	WBGene00015129
B0303.9	8.15849	6.08497	6.83198	16.5482	20.9448	15.181	24.794	18.0349	20.7295	13.9118	3.38578	7.5861	12.5149	15.3813	26.7541	17.7757	19.9578	13.204	18.2981	11.9852	WBGene00015130
B0304.1	0	0	0	0	0	0	0	0	0	0	0	0	0	0	0	0	0	0	0	0	WBGene00001948
B0304.2	9.51824	7.82354	11.3866	11.9364	14.3194	8.71501	3.81446	9.83719	13.1915	10.7704	10.1573	6.82749	6.70442	7.84759	14.3627	4.93769	9.50372	2.93423	4.81529	2.9963	WBGene00015134
B0304.3	0	0	0	0	0	0	0	0	0	0	0	0	0	0.313904	0	0	0	0	0	0	WBGene00015135
B0304.4	1.35975	5.21569	2.27733	3.25538	2.99212	3.93581	0	1.63953	5.6535	4.48767	1.12859	0.75861	1.78785	3.76684	2.25298	2.46884	3.80149	2.93423	4.81529	0	WBGene00015136
B0304.5	0	0	0	0	0	0	0	1.63953	0.94225	0.897533	0	0	0	0	0	0	0	1.46711	0	1.49815	WBGene00005058
B0304.6	0	0	0	0	0	0	0	0	0	0	0	0	0	0	0	0	0	0	0	0	WBGene00005059
B0304.7	0	0	0	0	0	0	0	0	0	0	0	0	0	0	0	0	0	0	0	0	WBGene00005060
B0304.8	0	0	0	0	0.213723	0	0	0	0	0	0	0	0	0	0	0	0	0	0	0	WBGene00005061
B0304.9	0	0	0	0	0	0	0	0	0	0	0	0	0	0	0	0	0	0	0	0	WBGene00005062
B0310.1	0	0	0	0	0	0	0	0	0	0	0	0	0	0	0	0	0	0	0	0	WBGene00015137
B0310.2	0	0	0	0	0	0	1.90723	0	0.94225	1.79507	0	0	0	0	0	0	0	0	0	0	WBGene00015138
B0310.3	0	0	0	0	0	0	0	0	0	0	0	0	0	0	0	0	0	0	0	0	WBGene00015139
B0310.5	0	0	0	0	0	0	0	0	0	0	0	0	0	0	0	0	0	0	0	0	WBGene00015141
B0310.6	0	0	0	0	0	0	0	0	0	0	0	0	0	0	0	0	0	0	0	0	WBGene00015142
B0331.1	0	0	0	0	0	0	0	0	0	0	0	0	0	0	0	0	0	0	0	0	WBGene00007140
B0331.2	0	0	0	0	0	0	0	0	0	0	0	0	0	0	0	0	0	0	0	0	WBGene00007141
B0334.1	0	0	0	0	0	0	0	1.63953	0	0	0	0	0	0	0	0	0	0	0	0	WBGene00007142
B0334.10	0	0	0	0	0	0	0	0	0	0	1.12859	0	0	0	0	0	0	0	0	0	WBGene00007148
B0334.11	10.878	14.3431	18.8693	26.5856	33.9819	23.896	20.9796	26.2325	35.8055	37.6964	10.1573	23.5169	17.8785	20.7176	23.9379	30.6137	22.8089	36.6779	26.9656	13.4833	WBGene00003868
B0334.13	0	0	0	0	0	0	0	0	0	0	0	0	0	0	0	0	0	0	0	0	WBGene00007149
B0334.15	0	2.60785	0.650665	1.35641	0.641168	0.843388	0	1.63953	2.82675	1.3463	2.25718	0.75861	3.57569	1.25561	1.68973	2.46884	2.85111	0	0	0	WBGene00195248
B0334.2	0	0.434641	0	0	1.06861	0.281129	0	3.27906	4.71125	1.3463	0	0	0	0.627807	0.281622	0.493769	2.85111	1.46711	2.88917	0	WBGene00006660
B0334.20	0	0	0	0	0	0	0	0	0	0	0	0	0	0	0	0	0	0	0	0	WBGene00219293
B0334.3	2.7195	3.91177	4.55465	4.88306	4.7019	4.49807	7.62893	8.19766	4.71125	9.4241	3.38578	4.55166	4.91657	2.19733	3.37946	3.45638	8.55334	5.86846	5.77834	5.9926	WBGene00007143
B0334.4	13.5975	13.9085	24.7253	27.1281	27.9977	28.3941	34.3302	14.7558	34.8632	31.4137	11.2859	16.6894	13.8558	15.3813	16.6157	16.2944	18.0571	13.204	20.2242	38.9519	WBGene00007144
B0334.5	31.2742	14.7778	15.9413	15.463	14.9606	17.9923	17.1651	18.0349	16.9605	18.3994	15.8003	24.2755	23.689	14.1257	23.093	16.7881	21.8585	17.6054	16.372	20.9741	WBGene00007145
B0334.6	0	0	0	0	0	0.281129	3.81446	3.27906	0	0	0	0	0	0	0	0	0	0	0	0	WBGene00007146
B0334.7	0	0	0	0	0	0	0	0	0	0	0	0	0	0	0	0	0	0	0	0	WBGene00005267
B0334.8	4.07925	4.34641	9.10931	7.86716	7.26657	7.87163	9.53616	6.55813	6.59575	7.62903	4.51437	3.03444	3.12873	9.73102	9.57515	4.44392	7.60297	16.1383	10.5936	16.4796	WBGene00000090
B0336.1	9.51824	11.7353	17.2426	21.9738	22.8683	21.647	11.4434	8.19766	12.2492	7.62903	12.4145	15.1722	22.795	14.4396	27.5989	24.1947	31.3623	23.4738	23.1134	8.9889	WBGene00006943
B0336.10	458.235	302.51	260.591	207.53	171.406	165.585	190.723	104.93	81.9757	23.7846	453.694	334.547	292.313	273.41	203.049	191.088	130.201	32.2765	31.7809	17.9778	WBGene00004435
B0336.11	0	0	0	0	0	0	0	1.63953	0	0	0	0	0	0	0	0	0	0	0	1.49815	WBGene00015148
B0336.12	0	0	0	0	0	0	0	0	0	0	0	0	0	0	0	0	0	0	0	0	WBGene00015149
B0336.13	9.51824	9.5621	15.2906	9.76613	14.1057	14.8999	11.4434	8.19766	7.538	19.7457	12.4145	6.06888	10.2801	12.5561	10.9833	10.8629	12.3548	7.33557	12.5197	4.49445	WBGene00015150
B0336.2	47.5912	52.1569	48.4745	40.1496	39.5387	33.4544	40.0519	49.186	55.5927	47.1205	27.0862	29.5858	41.1204	48.6551	37.1741	37.0326	38.0149	33.7436	54.8943	58.4278	WBGene00000182
B0336.3	4.07925	4.78105	2.92799	6.23947	5.77051	4.7792	1.90723	4.9186	6.59575	4.48767	3.38578	3.03444	2.68177	4.39465	3.94271	5.43146	5.70223	1.46711	4.81529	0	WBGene00015143
B0336.4	1.35975	0.434641	1.62666	1.89897	2.13723	2.24904	3.81446	1.63953	1.8845	4.48767	0	0.75861	1.78785	1.56952	2.5346	2.96261	7.60297	2.93423	2.88917	7.49075	WBGene00004348
B0336.5	1.35975	5.65033	10.0853	19.8035	18.5939	21.0847	36.2374	14.7558	26.383	26.4772	1.12859	8.34471	15.1967	11.3005	18.8687	24.1947	29.4615	22.0067	19.2611	17.9778	WBGene00015145
B0336.6	12.2377	10.866	13.0133	20.6174	23.9369	30.0809	9.53616	29.5116	15.076	33.6575	9.02873	17.448	16.9845	17.8925	24.5011	23.7009	26.6104	14.6711	19.2611	16.4796	WBGene00015146
B0336.7	12.2377	6.08497	6.18131	11.1225	9.19008	11.5263	13.3506	3.27906	13.1915	8.97533	9.02873	15.1722	5.8105	7.21979	6.4773	8.39407	9.50372	7.33557	4.81529	7.49075	WBGene00015147
B0336.8	0	1.73856	5.53065	7.86716	6.6254	7.30937	0	8.19766	2.82675	8.97533	5.64296	6.06888	5.36354	4.70856	5.35082	6.41899	14.2556	4.40134	1.92611	2.9963	WBGene00002982
B0336.9	1.35975	6.95425	10.4106	11.1225	6.6254	5.90372	5.7217	1.63953	4.71125	1.3463	6.77155	9.10332	7.15138	5.02246	6.4773	8.39407	7.60297	4.40134	5.77834	1.49815	WBGene00006359
B0344.2	0	0	0	0	0	0	0	0	0	0	0	0	0	0	0	0	0	0	0	0	WBGene00006955
B0348.1	0	0	0	0	0	0	0	0	0	0	0	0	0	0	0	0	0	0	0	0	WBGene00015151
B0348.2	0	0	0	0	0	0	0	0	0	0	0	0	0	0	0	0	0	0	0	0	WBGene00015152
B0348.4	0	0	0.650665	0	0	2.53017	7.62893	0	4.71125	3.59013	0	0	0	0.313904	0.281622	1.97507	1.90074	7.33557	3.85223	1.49815	WBGene00001177
B0348.5	0	0	0	0	0	0	1.90723	0	0	0	0	0	0	0	0.281622	0	0	0	0	0	WBGene00015153
B0348.6	28.5547	39.1177	48.4745	42.0486	47.6602	33.1733	24.794	36.0697	21.6717	21.9896	38.3721	29.5858	38.4387	63.4086	43.6514	34.5638	34.2134	19.0725	22.1503	20.9741	WBGene00002061
B0350.2	0	0	1.30133	0	0	0.562259	5.7217	0	4.71125	7.18027	0	0	0	0.313904	0	2.46884	0.950372	2.93423	4.81529	4.49445	WBGene00006780
B0350.3	0	0	0	0	0	0	0	0	0	0	0	0	0	0	0	0	0	0	0	0	WBGene00015154
B0353.1	0	0	0	0	0	0	0	0	0	0	0	0	0	0	0	0	0	0	0	0	WBGene00015155
B0361.10	5.43899	11.3007	12.3626	11.9364	11.7547	8.99614	5.7217	14.7558	8.48025	14.3605	3.38578	4.55166	8.0453	9.73102	9.57515	7.9003	14.2556	11.7369	8.66751	20.9741	WBGene00015164
B0361.11	0	0	0	0	0	0	0	0	0	0	0	0	0	0	0	0	0	0	0	0	WBGene00015165
B0361.2	10.878	11.3007	17.2426	21.1599	24.1507	17.7112	26.7013	32.7906	11.307	27.8235	11.2859	22.7583	14.3028	15.0674	20.5584	19.257	19.0074	19.0725	13.4828	17.9778	WBGene00015156
B0361.3	12.2377	5.21569	4.87998	8.681	10.6861	12.6508	7.62893	27.8721	8.48025	8.52656	3.38578	10.6205	6.70442	7.84759	12.9546	6.41899	14.2556	11.7369	26.9656	8.9889	WBGene00015157
B0361.4	0	0	0	0	0	0	0	0	0.94225	0	0	0	0	0	0	0	0	0	0	0	WBGene00015158
B0361.5	6.79874	6.51961	5.53065	7.3246	7.69402	8.71501	3.81446	8.19766	5.6535	10.3216	7.90014	12.1378	7.59834	7.21979	6.75893	9.3816	1.90074	0	4.81529	7.49075	WBGene00015159
B0361.6	19.0365	34.3366	18.5439	26.5856	19.4488	21.647	9.53616	19.6744	17.9027	23.7846	15.8003	24.2755	19.6663	16.0091	14.926	20.2445	20.9082	23.4738	20.2242	17.9778	WBGene00015160
B0361.7	1.35975	2.1732	15.616	15.463	13.6783	11.2452	17.1651	13.1163	19.7872	9.87286	1.12859	10.6205	9.38619	5.96417	11.2649	10.8629	9.50372	23.4738	21.1873	14.9815	WBGene00015161
B0361.8	9.51824	5.65033	9.43464	8.95228	8.12146	7.87163	3.81446	0	3.769	3.59013	3.38578	3.79305	4.02265	1.88342	5.35082	5.43146	1.90074	5.86846	2.88917	0	WBGene00015162
B0361.9	0	0	0	0	0	5.90372	0	1.63953	0.94225	3.59013	0	0	0	0	2.81622	3.45638	0.950372	1.46711	0	2.9963	WBGene00015163
B0365.1	13.5975	16.951	20.8213	21.9738	29.7075	49.7599	26.7013	52.465	37.69	49.3643	10.1573	22.7583	29.0525	27.3096	44.4963	39.0077	53.2208	29.3423	55.8573	71.9112	WBGene00007150
B0365.3	12.2377	20.8628	23.4239	20.6174	22.2272	17.9923	30.5157	26.2325	16.0182	24.6822	14.6717	18.9653	19.6663	23.8567	24.7827	20.7383	23.7593	38.145	24.0764	16.4796	WBGene00001137
B0365.5	0	0	0	0	0	0	0	0	0	0	0	0	0	0	0	0	0	0	0	0	WBGene00007152
B0365.6	0	0	0	0	0	0	0	0	0	0	0	0	0	0	0	0	0	0	0	0	WBGene00007153
B0365.7	0	0	0	0	0	0	0	0	0	0	0	0	0	0	0	0	0	0	0	0	WBGene00007154
B0365.9	0	0	0	0	0	0	0	0	0	0	0	0	0	0	0	0	0	0	0	0	WBGene00219208
B0379.1	0	0	0	0	0.213723	0	0	0	0	0	0	0	0	0	0	0	0	0	0	0	WBGene00007155
B0379.2	0	0	0	0	0	0	0	0	0	0	0	0	0	0	0	0	0	0	0	0	WBGene00007156
B0379.3	12.2377	15.6471	19.8453	20.6174	18.8076	14.8999	11.4434	22.9535	18.845	20.6433	5.64296	7.5861	11.174	15.0674	19.4319	19.7507	20.9082	14.6711	24.0764	26.9667	WBGene00003508
B0379.4	1.35975	0.869282	1.62666	0.813844	1.70978	0	0	0	0.94225	0.897533	1.12859	0.75861	2.23481	0.313904	3.09784	0	0.950372	4.40134	0	0	WBGene00007054
B0379.6	0	0	0	0	0	0	0	0	0	0	0	0	0	0	0	0	0	0	0	0	WBGene00007158
B0379.7	0	0	0	0	0	0	0	0	0	0	0	0	0	0	0	0	0	0	0	0	WBGene00007159
B0391.11	0	0	0	0	0	0	0	0	0	0	0	0	0	0	0	0	0	0	0	0	WBGene00007166
B0391.12	0	0	0	0	0	0	0	0	0	0	0	0	0	0	0	0	0	0	0	0	WBGene00006289
B0391.14	0	0	0	0	0	0	0	0	0	0	0	0	0	0	0	0	0	0	0	0	WBGene00206462
B0391.3	0	0	0	0	0	0	0	0	0	0	0	0	0	0	0	0	0	0	0	0	WBGene00007161
B0391.4	0	0	0	0	0	0	0	0	0	0	0	0	0	0	0	0	0	0	0	0	WBGene00006080
B0391.5	0	0	0	0	0	1.40565	1.90723	0	1.8845	0.448767	0	0	0	0	0	0.987537	3.80149	2.93423	0	1.49815	WBGene00007162
B0391.6	0	0	0	0	0	0	0	0	0	0	0	0	0	0	0	0	0	0	0	0	WBGene00007163
B0391.9	0	0.434641	0	0	0	0	0	0	0	0	0	0.75861	0	0	0	0	0.950372	0	0	0	WBGene00007164
B0393.1	373.931	302.945	251.157	201.833	164.139	153.497	131.599	55.7441	60.304	17.5019	458.208	303.444	297.229	247.356	193.193	187.632	124.499	35.2108	13.4828	13.4833	WBGene00004469
B0393.2	12.2377	20.4281	25.0506	34.1814	33.9819	34.2978	36.2374	37.7092	44.2857	45.3254	2.25718	13.655	29.9464	20.4037	29.0071	34.5638	33.263	22.0067	22.1503	35.9556	WBGene00007167
B0393.3	6.79874	16.0817	14.64	21.9738	25.2193	26.4262	34.3302	26.2325	24.4985	31.8624	14.6717	10.6205	19.6663	15.6952	25.346	21.7258	19.0074	24.9409	14.4459	20.9741	WBGene00007168
B0393.4	0	0	0	0	0	0	0	0	0	0	0	0	0	0	0	0	0	0	0	0	WBGene00007169
B0393.5	0	0	0	0	0.213723	0.281129	0	0	0	0	0	0	0	0	0	0.493769	0	0	0	0	WBGene00007170
B0393.6	12.2377	11.7353	12.0373	20.3461	26.0742	20.8036	13.3506	13.1163	17.9027	23.3359	14.6717	12.8964	16.9845	10.6727	19.1503	12.838	15.2059	14.6711	10.5936	16.4796	WBGene00007171
B0393.7	0	0	0	0	0	0	0	0	0	0	0	0	0	0	0	0	0	0	0	0	WBGene00007172
B0393.8	9.51824	13.4739	13.664	8.681	13.0371	9.83953	7.62893	0	3.769	2.6926	12.4145	4.55166	9.83315	8.4754	3.37946	3.95015	1.90074	0	1.92611	0	WBGene00007173
B0393.9	0	0.434641	0	0.271281	0.641168	0.281129	0	0	0	0.448767	0	0.75861	0	0.313904	0.563244	0.493769	0	2.93423	2.88917	5.9926	WBGene00044636
B0395.1	0	0	0	0	0	0	0	0	0	0	0	0	0	0	0	0	0	0	0	0	WBGene00003729
B0395.2	0	0	0	0	0	0	0	0	0	0	0	0	0	0	0	0	0	0	0	0	WBGene00007174
B0395.3	0	0.434641	0	0.542563	0	0	0	0	2.82675	1.3463	0	0	0	0	0	1.97507	0	1.46711	0	1.49815	WBGene00007175
B0399.1	0	0	0	0	0	0	0	0	0	0.448767	0	0	0	0	0	0	0	0	0	0	WBGene00007176
B0399.2	0	0	0	0	0	0	0	0	0	0	0	0	0	0	0	0	0	0	0	0	WBGene00007177
B0403.2	0	0	0	0	0	0	0	0	0	0.448767	0	0	0	0	0	0	0	0	0	0	WBGene00006712
B0403.3	0	0	0	0	0	0	0	0	0	0	0	0	0	0	0	0	0	0	0	0	WBGene00015167
B0403.4	1.35975	0.434641	3.57866	1.35641	1.28234	21.0847	43.8663	14.7558	22.614	31.4137	0	0	0.893923	0.627807	1.12649	28.1448	46.5682	35.2108	27.9287	11.9852	WBGene00015168
B0403.5	0	0	0	0.271281	0	0	0	0	0	0	0	0	0	0	0	0.493769	0	0	0	0	WBGene00015169
B0403.6	0	0	0	0	0	0	0	0	0	0	0	0	0	0	0	0	0	0	0	0	WBGene00043982
B0410.1	0	0	0	0	0	0	0	0	0	0	0	0	0	0	0	0	0	0	0	0	WBGene00015170
B0410.2	0	0	0.325332	0	0	2.24904	3.81446	0	2.82675	4.0389	0	0	0	0	0.563244	2.46884	3.80149	4.40134	3.85223	4.49445	WBGene00015171
B0410.3	0	0	0	0	0	0	0	0	0	0	0	0	0	0	0	0	0	0	0	1.49815	WBGene00015172
B0412.1	0	0	0	0	0	0	0	0	0	0	0	0	0	0	0	0	0	0	0	0	WBGene00000895
B0412.2	0	0	0	0	0	0	0	0	0	0	0	0	0	0	0	0	0	0	0	0	WBGene00000903
B0412.3	5.43899	13.9085	10.4106	7.86716	11.9685	5.62259	7.62893	3.27906	9.4225	7.18027	6.77155	3.03444	9.38619	10.0449	9.85677	5.92522	7.60297	5.86846	2.88917	7.49075	WBGene00015173
B0412.4	184.926	214.278	167.871	115.837	115.838	116.388	91.5471	44.2674	33.921	18.8482	251.676	171.446	246.276	203.724	84.4866	86.9033	30.4119	8.80269	19.2611	8.9889	WBGene00004498
B0414.1	0	0	0	0	0	0	0	0	0	0	0	0	0	0	0	0	0	0	0	0	WBGene00015175
B0414.2	1.35975	0	0	0	0	0.281129	0	0	0	0	0	0	0	0	0	0.493769	0	0	0	0	WBGene00004393
B0414.3	194.444	186.461	139.242	139.167	124.173	123.978	127.785	145.918	142.28	128.796	181.703	193.446	139.452	90.4043	99.4125	113.073	145.407	126.172	108.825	73.4093	WBGene00001856
B0414.5	12.2377	26.0785	20.8213	23.6015	14.7469	15.181	15.2579	11.4767	19.7872	17.0531	6.77155	20.4825	16.0906	21.0316	18.3054	11.8504	20.9082	14.6711	14.4459	25.4685	WBGene00000772
B0414.6	4.07925	7.38889	8.45864	6.23947	6.83913	5.06033	15.2579	9.83719	1.8845	8.0778	1.12859	5.31027	5.36354	7.53369	5.35082	4.44392	7.60297	2.93423	7.70446	4.49445	WBGene00001600
B0414.7	4.07925	4.34641	9.75997	10.8513	12.1822	14.6187	28.6085	9.83719	23.5562	19.297	10.1573	14.4136	14.3028	10.3588	14.3627	18.2694	19.9578	19.0725	20.2242	14.9815	WBGene00003472
B0414.8	8.15849	9.5621	12.688	17.6333	21.586	22.4904	13.3506	19.6744	11.307	13.0142	3.38578	6.82749	12.5149	13.8118	18.3054	16.7881	19.9578	16.1383	16.372	8.9889	WBGene00015176
B0416.1	0	0	0	0	0	0	0	0	0	0	0	0	0	0	0	0	0	0	0.963057	0	WBGene00015177
B0416.10	0	0	0	0	0.213723	1.96791	1.90723	0	0	0	0	0	0	0	1.68973	0.987537	0.950372	0	0.963057	0	WBGene00206482
B0416.11	0	0	0	0	0	0	0	0	0	0	0	0	0	0	0	0	0	0	0	0	WBGene00206483
B0416.2	0	0	0	0	0	0	0	0	0	0	0	0	0	0	0	0	0	0	0	0	WBGene00015178
B0416.3	0	0	0	0	0	0	0	0	0	0	0	0	0	0	0	0	0	0	0	0	WBGene00015179
B0416.4	0	0	0.325332	0	0	4.49807	5.7217	3.27906	3.769	7.18027	0	0	0	0	2.25298	6.91276	0.950372	4.40134	4.81529	1.49815	WBGene00015180
B0416.5	1.35975	0.434641	0.650665	0.271281	0.427445	14.8999	22.8868	9.83719	6.59575	13.463	0	0	0.446961	0.313904	3.37946	20.2445	11.4045	13.204	15.4089	13.4833	WBGene00015181
B0416.6	0	0.434641	0	0	0.427445	3.37355	1.90723	0	0	1.3463	1.12859	0.75861	0.446961	0	1.97135	4.44392	4.75186	1.46711	0	1.49815	WBGene00001638
B0416.7	0	0	0	0	0	0	0	0	0	0	0	0	0	0	0	0	0	0	0	0	WBGene00015182
B0432.1	0	0	0	0	0	0.281129	0	0	0	0	0	0	0	0	0.281622	0	0	0	0	0	WBGene00015183
B0432.10	2.7195	1.73856	2.27733	1.89897	1.9235	2.81129	0	1.63953	4.71125	1.79507	1.12859	5.31027	1.78785	4.08075	2.81622	4.93769	0.950372	0	2.88917	0	WBGene00015191
B0432.11	0	0	0	0	0	0	0	0	0	0	0	0	0	0	0	0	0	0	0	0	WBGene00015192
B0432.12	0	0	0	0	0	0	0	0	0	0	0	0	0	0	0	0	0	0	0	0	WBGene00015193
B0432.13	4.07925	3.47713	4.87998	6.23947	5.55679	4.49807	3.81446	6.55813	5.6535	13.9118	2.25718	9.10332	6.25746	4.39465	7.60379	7.9003	7.60297	4.40134	5.77834	7.49075	WBGene00015194
B0432.14	1.35975	0	0	0.813844	0.641168	1.40565	0	0	0.94225	0.897533	0	0	0.446961	0.627807	0.281622	0.987537	2.85111	0	0	0	WBGene00044640
B0432.2	14.9572	10.866	17.5679	17.6333	11.3273	11.5263	5.7217	9.83719	9.4225	11.6679	13.5431	9.10332	8.49227	16.0091	12.9546	5.43146	7.60297	7.33557	17.335	17.9778	WBGene00015184
B0432.3	9.51824	13.9085	13.3386	12.4789	8.33519	7.02824	5.7217	1.63953	6.59575	3.14137	10.1573	11.3792	8.49227	14.1257	9.29352	6.41899	2.85111	2.93423	0	1.49815	WBGene00015185
B0432.4	5.43899	9.12746	7.15731	5.15435	5.77051	6.18485	0	8.19766	6.59575	10.7704	5.64296	4.55166	5.36354	8.1615	5.35082	7.40653	4.75186	2.93423	5.77834	11.9852	WBGene00015186
B0432.5	0	0	0	0	0	0	0	0	0	0	0	0	0	0	0	0	0	0	0	0	WBGene00000296
B0432.6	0	0	0.325332	0	0	0.281129	0	0	0	0	0	0	0	0.313904	0	0.493769	0	0	0	0	WBGene00015187
B0432.7	0	0.434641	0	0	0	0	0	0	0.94225	0	0	0	0	0	0	0	0	0	0	0	WBGene00015188
B0432.8	1.35975	2.1732	7.15731	7.05331	8.54891	8.71501	9.53616	6.55813	7.538	5.3852	2.25718	4.55166	4.46961	4.39465	5.06919	6.41899	10.4541	2.93423	8.66751	4.49445	WBGene00015189
B0432.9	1.35975	0	0.325332	0.813844	0	1.40565	0	0	0	0	1.12859	1.51722	0	0.313904	0.844866	0.493769	0.950372	0	0.963057	0	WBGene00015190
B0454.1	1.35975	2.1732	1.95199	0.542563	1.06861	5.90372	3.81446	1.63953	1.8845	2.24383	0	0.75861	1.34088	0.627807	1.12649	0.987537	2.85111	7.33557	1.92611	2.9963	WBGene00002997
B0454.10	0	0	0	0	0	0	0	0	0	0	0	0	0	0	0	0	0	0	0	0	WBGene00005542
B0454.2	0	0	0	0	0	0	0	0	0	0	0	0	0	0	0	0	0	0	0	0	WBGene00005543
B0454.26	0	0	0	0	0	0	0	0	0	0	0	0	0	0	0	0	0.950372	0	0	0	WBGene00206372
B0454.3	0	0	0	0	0	0	0	0	0	0	0	0	0	0	0	0	0	0	0	0	WBGene00005540
B0454.4	0	0	0	0	0	0	0	0	0	0	0	0	0	0	0	0	0	0	0	0	WBGene00005541
B0454.5	0	0	0	0	0	0	0	0	0	0	0	0	0	0	0	0	0	0	0	0	WBGene00015196
B0454.6	0	0	0	0	0	0	0	0	0	0	0	0	0	0	0	0	0	0	0	0	WBGene00015197
B0454.7	0	0	0	0	0	0	0	0	0	0	0	0	0	0	0	0	0	0	0	0	WBGene00015198
B0454.8	0	0	0	0	0	0	0	0	0	0	0	0	0	0	0	0	0	0	0	0	WBGene00015199
B0454.9	0	0	0.325332	0	0	6.18485	5.7217	6.55813	5.6535	3.59013	0	0.75861	0	0	0.281622	6.91276	3.80149	7.33557	2.88917	2.9963	WBGene00015200
B0457.1	8.15849	9.99674	16.5919	12.4789	14.1057	13.4942	11.4434	29.5116	31.0942	23.7846	7.90014	4.55166	18.3254	14.1257	21.1216	16.7881	12.3548	8.80269	28.8917	38.9519	WBGene00002251
B0457.2	0	0	0	0	0	0	0	0	0	0	0	0	0	0	0	0	0	0	0	0	WBGene00007178
B0457.4	0	0	0	0	0	0	0	0	0	0	0	0	0	0	0	0	0	0	0	0	WBGene00007179
B0457.6	0	0	0	0	0.427445	0	0	0	0	0	1.12859	0	0	0	0	0.493769	0	1.46711	0	0	WBGene00007180
B0462.1	0	0	0	0	0	0	0	0	0	0	0	0	0	0	0	0	0	0	0	0	WBGene00007181
B0462.3	0	0	0	0	0	0	0	0	0	0	0	0	0	0	0	0	0	0	0	0	WBGene00007182
B0462.4	0	0	0	0	0	0	0	0	0	0	0	0	0	0	0	0	0	0	0	0	WBGene00007183
B0462.5	0	0	0	0	0	0	0	0	0	0	0	0	0	0	0	0	0	0	0	0	WBGene00194695
B0464.1	99.2617	64.3268	60.1865	49.6445	54.4993	38.5147	43.8663	67.2208	69.7265	53.4032	71.1013	53.8613	62.1276	83.4984	56.606	43.4516	51.3201	33.7436	62.5987	64.4204	WBGene00001094
B0464.2	16.317	16.0817	18.5439	20.6174	20.3037	23.6149	17.1651	21.3139	30.152	22.4383	15.8003	28.0686	23.242	22.6011	19.7135	24.6884	18.0571	35.2108	30.8178	19.4759	WBGene00007184
B0464.3	14.9572	10.4314	14.64	14.6492	13.6783	15.4621	24.794	14.7558	26.383	34.1063	11.2859	10.6205	14.7497	15.0674	15.4892	19.7507	35.1637	24.9409	29.8548	41.9482	WBGene00007185
B0464.4	2.7195	6.51961	14.9653	11.9364	11.7547	13.4942	9.53616	14.7558	14.1337	17.5019	1.12859	10.6205	11.621	8.1615	16.3341	11.8504	18.0571	22.0067	29.8548	13.4833	WBGene00000268
B0464.5	29.9145	35.2059	50.7518	36.623	38.6838	27.5507	17.1651	21.3139	20.7295	29.1698	45.1437	41.7236	35.3099	45.8299	42.2433	39.0077	32.3126	36.6779	35.6331	47.9408	WBGene00004980
B0464.6	4.07925	8.25818	10.0853	8.95228	9.61752	8.15275	11.4434	4.9186	14.1337	17.0531	13.5431	12.8964	9.38619	8.1615	9.85677	9.3816	13.3052	10.2698	9.63057	13.4833	WBGene00007186
B0464.7	19.0365	29.9902	25.7013	22.5164	20.5174	24.1771	24.794	16.3953	34.8632	18.8482	19.1861	22.7583	20.5602	38.9241	20.5584	15.3068	15.2059	7.33557	8.66751	7.49075	WBGene00000235
B0464.8	6.79874	4.78105	4.87998	5.42563	6.6254	6.46598	5.7217	4.9186	7.538	5.3852	7.90014	8.34471	8.49227	4.70856	5.91406	3.95015	5.70223	2.93423	3.85223	1.49815	WBGene00007187
B0464.9	6.79874	9.12746	10.4106	13.8353	12.6096	12.932	17.1651	16.3953	6.59575	11.6679	2.25718	8.34471	13.4088	8.7893	9.57515	6.91276	6.6526	13.204	6.7414	7.49075	WBGene00007188
B0478.1	0	0	0	0.271281	0	0.281129	0	0	0.94225	0	0	0	0	0	0	0	0	0	0	1.49815	WBGene00002178
B0478.3	0	0	0	0	0	0	0	0	0	0	0	0	0	0	0	0	0	0	0	0	WBGene00015202
B0491.1	0	6.51961	6.18131	7.86716	8.76263	9.83953	7.62893	8.19766	9.4225	7.18027	3.38578	9.10332	7.15138	4.39465	7.88541	7.40653	6.6526	10.2698	1.92611	2.9963	WBGene00007189
B0491.2	0	0	0	0	0	0	0	0	0	0	0	0	0	0	0	0	0	0	0	0	WBGene00005016
B0491.3	0	0	0	0	0	0	0	0	0	0	0	0	0	0	0	0	0	0	0	0	WBGene00007190
B0491.4	0	0	0	0	0	0	0	0	0	0	0	0	0	0	0	0	0	0	0	0	WBGene00007191
B0491.5	13.5975	16.951	16.9173	16.0056	16.2429	14.3376	15.2579	18.0349	20.7295	17.5019	14.6717	16.6894	13.8558	22.915	12.673	11.8504	14.2556	11.7369	12.5197	22.4722	WBGene00007192
B0491.6	2.7195	2.60785	5.20532	4.61178	5.34307	6.74711	3.81446	1.63953	1.8845	8.0778	4.51437	7.5861	3.57569	1.88342	4.22433	3.45638	1.90074	5.86846	0	1.49815	WBGene00007193
B0491.7	10.878	11.7353	9.75997	7.3246	6.6254	4.7792	5.7217	1.63953	1.8845	2.24383	4.51437	7.5861	5.36354	12.2422	4.22433	4.44392	3.80149	4.40134	1.92611	1.49815	WBGene00007194
B0491.8	0	0	0	0	0	0	0	0	0	0	0	0	0	0	0	0	0	0	0	0	WBGene00000529
B0495.1	0	0	0	0	0.213723	0	0	0	0	0	0	0	0	0	0	0	0	0	0	0	WBGene00005149
B0495.10	0	0	0	0	0	0	0	0	0	0.448767	0	0	0	0	0	0	0	0	1.92611	0	WBGene00007044
B0495.2	8.15849	12.6046	10.0853	11.1225	11.1136	9.83953	5.7217	13.1163	7.538	4.93643	16.9289	15.1722	10.2801	12.5561	13.7995	11.8504	8.55334	7.33557	13.4828	5.9926	WBGene00015203
B0495.4	0	0	0	0	0	0	0	0	0	0	0	0	0	0	0	0	0	0	0	0	WBGene00003730
B0495.5	0	1.30392	3.25332	2.44153	1.9235	4.21694	0	0	0	2.24383	0	3.79305	2.68177	1.56952	2.81622	0.493769	0	0	0	0	WBGene00015204
B0495.6	4.07925	12.1699	16.5919	7.86716	13.0371	11.2452	3.81446	13.1163	13.1915	13.0142	9.02873	5.31027	6.25746	12.8701	7.88541	6.41899	6.6526	7.33557	10.5936	8.9889	WBGene00015205
B0495.7	17.6767	12.1699	13.0133	11.6651	13.2508	12.3697	13.3506	13.1163	17.9027	13.9118	21.4432	15.9308	9.38619	10.6727	16.6157	19.7507	19.0074	14.6711	15.4089	13.4833	WBGene00015206
B0495.8	17.6767	10.866	13.9893	14.9205	14.1057	17.7112	15.2579	14.7558	10.3647	16.6044	19.1861	7.5861	15.6436	11.9283	13.7995	21.7258	15.2059	10.2698	18.2981	13.4833	WBGene00015207
B0495.9	14.9572	8.69282	12.0373	12.7502	10.6861	8.99614	3.81446	4.9186	5.6535	3.59013	13.5431	10.6205	10.2801	7.84759	6.75893	12.3442	3.80149	8.80269	2.88917	4.49445	WBGene00015208
B0496.1	0	0	0	0	0	0	0	0	0	0	0	0	0	0	0	0	0	0	0	0	WBGene00015210
B0496.11	0	0	0	0	0	0	0	0	0	0	0	0	0	0	0	0	0	0	0	0	WBGene00194883
B0496.2	0	0	0	0	0	0	0	0	0	0	0	0	0	0	0	0	0	0	0	0	WBGene00015211
B0496.3	0	0.434641	0.650665	0	0	0	0	0	0	0	0	0	0	0	0	0	0	0	1.92611	0	WBGene00006814
B0496.5	0	0	0	0	0	0	0	0	0	0	0	0	0	0	0	0	0	0	0	0	WBGene00015214
B0496.6	0	0	0	0	0	0	0	0	0	0	0	0	0	0	0	0	0	0	0	0	WBGene00015215
B0496.7	0	0.434641	0	0.542563	0.213723	0.843388	1.90723	0	0	0	0	0	0	0.313904	0.281622	0	0	0	0	0	WBGene00015216
B0496.8	0	0	0.650665	0	0.641168	0.562259	7.62893	4.9186	1.8845	0.897533	0	0	0	0	0	0.493769	4.75186	1.46711	1.92611	0	WBGene00015217
B0507.1	0	0	0	0	0	0.281129	0	0	0	0	0	0	0	0	0	1.48131	1.90074	0	0	0	WBGene00015218
B0507.10	0	0	0	0	0	0	0	0	0	0	0	0	0	0	0	0	0	0	0	0	WBGene00015227
B0507.11	0	0	0	0	0	0	0	0	0	0	0	0	0	0	0	0	0	0	0	0	WBGene00006006
B0507.15	0	0	0	0	0	0	0	0	0	0	0	0	0	0	0	0	0	0	0	0	WBGene00202499
B0507.2	0	0	0	0	0.213723	0.562259	1.90723	1.63953	0.94225	4.0389	0	0	0	0	0.281622	0.987537	4.75186	2.93423	0	2.9963	WBGene00015219
B0507.3	0	0	0	0	0	0	0	0	0	0	0	0	0	0	0	0	0	0	0	0	WBGene00015220
B0507.4	0	0	0	0	0	0	0	0	0	0	0	0	0	0	0	0	0	0	0	0	WBGene00015221
B0507.5	0	0	0	0	0	0	0	0	0	0	0	0	0	0	0	0	0	0	0	0	WBGene00015222
B0507.6	0	0.434641	0	0	0	0	0	0	0	0	0	0	0	0	0	0	0	0	0	0	WBGene00015223
B0507.7	0	0	0	0	0	0	0	0	0	0	0	0	0	0	0	0	0	0	0	0	WBGene00015224
B0507.8	0	0	0	0	0	0	0	0	0	0	0	0	0	0	0	0	0	0	0	0	WBGene00015225
B0507.9	0	0	0	0	0	0	0	0	0	0	0	0	0	0	0	0	0	0	0	0	WBGene00015226
B0511.1	0	0.434641	0.325332	0	0	0.281129	0	0	0	0.448767	0	0	0	0	0	0.987537	0	0	0.963057	0	WBGene00001432
B0511.10	12.2377	14.3431	13.664	11.3938	9.61752	5.90372	11.4434	21.3139	6.59575	9.87286	9.02873	12.8964	10.7271	16.0091	13.2362	8.88784	11.4045	10.2698	4.81529	4.49445	WBGene00001228
B0511.11	0	0	0	0	0	0.843388	0	0	0	0.897533	0	5.31027	1.78785	2.82513	0.844866	0.493769	2.85111	0	0.963057	0	WBGene00015236
B0511.12	1.35975	6.95425	10.4106	10.3087	10.6861	14.0565	22.8868	16.3953	14.1337	14.8093	5.64296	15.1722	12.5149	13.8118	18.0238	13.8255	13.3052	32.2765	14.4459	13.4833	WBGene00015237
B0511.13	9.51824	12.1699	14.3146	19.261	18.5939	14.6187	20.9796	16.3953	18.845	17.5019	14.6717	12.8964	15.1967	13.184	12.3914	11.8504	18.0571	5.86846	12.5197	23.9704	WBGene00015238
B0511.17	0	0	0	0	0	0	0	0	0	0	0	0	0	0	0	0	0	0	0	0	WBGene00219234
B0511.2	0	1.30392	0.975997	1.35641	1.06861	0.562259	0	0	0	0.448767	1.12859	0.75861	0.446961	0.313904	1.40811	0.493769	0	0	1.92611	2.9963	WBGene00015228
B0511.3	0	0	0	0	0	0	0	0	0	0	0	0	0	0	0.281622	0	0	0	0	0	WBGene00015229
B0511.4	0	0	0	0	0	0	0	0	0	0	0	0	0	0	0	0	0	0	0	0	WBGene00015230
B0511.5	0	0.434641	0	0	0.213723	0.281129	0	0	0	0	0	0	0	0	0	0	0	0	0	0	WBGene00015231
B0511.6	38.073	36.9445	31.2319	22.7876	23.7232	19.6791	19.0723	13.1163	15.076	9.87286	34.9863	20.4825	25.9238	32.0182	21.9665	19.257	19.0074	7.33557	11.5567	10.487	WBGene00015232
B0511.7	2.7195	4.78105	6.50665	11.6651	8.12146	8.15275	7.62893	3.27906	7.538	9.87286	4.51437	6.82749	6.25746	5.33636	5.35082	7.9003	6.6526	5.86846	9.63057	7.49075	WBGene00015233
B0511.8	9.51824	10.866	6.18131	10.3087	7.69402	5.62259	7.62893	8.19766	8.48025	4.48767	6.77155	6.06888	8.0453	12.8701	5.91406	3.45638	2.85111	1.46711	3.85223	2.9963	WBGene00044321
B0511.9	14.9572	20.8628	42.2932	36.623	29.7075	13.4942	19.0723	21.3139	16.0182	24.6822	16.9289	29.5858	21.0072	20.7176	15.2076	22.2196	26.6104	23.4738	19.2611	17.9778	WBGene00015235
B0513.1	0	0	0	0	0	0.281129	0	3.27906	0	1.79507	0	0	0	0	0.281622	0.987537	0.950372	1.46711	0.963057	0	WBGene00001562
B0513.2	21.756	25.6438	22.7733	24.9579	18.3802	14.0565	13.3506	13.1163	13.1915	14.8093	20.3147	25.7927	31.2873	26.3679	13.2362	23.7009	17.1067	16.1383	12.5197	7.49075	WBGene00007195
B0513.3	379.37	302.945	235.866	178.503	164.78	161.368	146.857	67.2208	47.1125	20.6433	335.192	270.824	324.047	239.509	152.921	122.948	66.526	23.4738	12.5197	8.9889	WBGene00004443
B0513.4	5.43899	4.34641	6.83198	9.49485	8.33519	17.1489	85.8255	100.011	53.7082	32.76	0	3.79305	7.59834	20.7176	23.3746	33.0825	68.4268	68.9544	52.9681	155.808	WBGene00007196
B0513.5	0	0	0	0.271281	0.427445	0.843388	0	0	0.94225	1.3463	0	0	0	0.627807	0	1.48131	0.950372	0	1.92611	4.49445	WBGene00007197
B0513.6	0	0	0	0	0	0.281129	0	0	0	0	0	0	0	0	0	0	0	0	0	0	WBGene00007198
B0513.9	0	0	0	0	0	0	0	0	0	0	0	0	0	0	0	0	0	0	0	0	WBGene00007200
B0523.1	0	0	0	0	0	0	0	0	0	0	0	0.75861	0	0	0.281622	0	0	0	0	0	WBGene00002212
B0523.3	8.15849	14.7778	14.9653	15.1918	10.045	6.46598	7.62893	9.83719	9.4225	7.62903	15.8003	11.3792	14.7497	11.6144	9.29352	5.92522	6.6526	7.33557	5.77834	2.9963	WBGene00003993
B0523.5	8.15849	9.5621	6.83198	5.96819	8.33519	9.5584	7.62893	16.3953	7.538	6.28273	11.2859	7.5861	5.8105	5.96417	9.29352	9.87537	3.80149	8.80269	6.7414	4.49445	WBGene00001443
B0524.2	0	0	0	0	0	0	0	0	0	0	0	0	0	0	0	0	0	0	0	0	WBGene00015241
B0524.3	0	0	0	0	0	0	0	0	0	0	0	0	0	0	0	0	0	0	0	0	WBGene00015242
B0524.4	0	0	0	0	0	0	0	0	0	0	0	0	0	0	0	0	0	0	0	0	WBGene00015243
B0524.5	0	0	0	0	0	0	0	0	0	0	0	0	0	0	0	0	0	0	0	0	WBGene00015244
B0524.6	0	0	0	0.271281	0	0.281129	0	0	0	0.448767	0	0.75861	0	0.627807	0.281622	0	0	0	0	0	WBGene00015245
B0545.1	0	0	0	0	0	0	0	0	0	0	0	0	0	0	0	0	0	0	0	0	WBGene00006599
B0545.3	0	0	0	0	0	0	0	0	0	0	0	0	0	0	0	0	0	0	0	0	WBGene00015246
B0545.4	0	0.434641	0.975997	1.08513	0.854891	0.281129	7.62893	4.9186	0.94225	3.14137	0	0	0	0	0	0.493769	3.80149	1.46711	0.963057	0	WBGene00015247
B0546.1	62.5484	82.1471	58.5598	61.0383	50.2248	46.6675	41.9591	77.058	60.304	55.6471	55.301	43.9994	67.9381	102.647	54.0714	54.8083	55.1216	48.4148	64.5248	71.9112	WBGene00015248
B0546.2	5.43899	7.38889	9.10931	13.8353	12.1822	10.6829	17.1651	9.83719	9.4225	14.8093	6.77155	10.6205	8.49227	9.10321	7.60379	9.87537	9.50372	8.80269	10.5936	8.9889	WBGene00015249
B0546.3	0	0	0	0	0.213723	0	0	0	0	0	0	0	0	0	0	0	0	0	0	0	WBGene00015250
B0546.4	8.15849	5.65033	6.83198	8.40972	7.05285	7.87163	13.3506	9.83719	8.48025	8.0778	4.51437	7.5861	5.36354	6.27807	9.29352	10.8629	11.4045	5.86846	6.7414	19.4759	WBGene00015251
B0546.5	0	0	0	0	0	0	0	0	0	0	0	0	0	0	0	0	0	0	0	0	WBGene00015252
B0547.1	16.317	28.6863	26.6773	26.8569	34.6231	28.6752	17.1651	29.5116	24.4985	21.092	12.4145	24.2755	18.7724	25.1123	22.2481	24.6884	31.3623	26.4081	28.8917	29.963	WBGene00000817
B0547.2	0	0	0	0	0	0	0	0	0	0	0	0	0	0	0	0	0	0	0	0	WBGene00015253
B0547.4	0	0	0	0	0	0	0	0	0	0	0	0	0	0	0	0	0	0	0	0	WBGene00005086
B0554.1	0	0	0	0	0	0	0	0	0	0	0	0	0	0	0	0	0	0	0	0	WBGene00015254
B0554.2	0	0	0	0	0	0	0	0	0	0	0	0	0	0	0	0	0	0	0	0	WBGene00015255
B0554.3	0	0	0	0	0	0	0	0	0	0	0	0	0	0	0	0	0	0	0	0	WBGene00015256
B0554.4	0	0	0	0	0	0	0	0	0	0	0	0	0	0	0	0	0	0	0	0	WBGene00015257
B0554.5	0	0	0	0	0	0	0	0	0	0	0	0	0	0	0	0	0	0	0	0	WBGene00015258
B0554.6	0	0	0	0	0	0	0	0	0	0	0	0	0	0	0	0	0	0	0	0	WBGene00015259
B0554.7	0	0	0	0	0	0	0	0	0	0	0	0	0	0	0	0	0	0	0	0	WBGene00015260
B0563.1	0	0	0	0	0	0	0	0	0	0	0	0	0	0	0	0	0	0	0	0	WBGene00015261
B0563.10	0	0	0	0	0	0	0	0	0	0	0	0	0	0	0	0	0	0	0	0	WBGene00077673
B0563.18	0	0	0	0	0	0	0	0	0	0	0	0	0	0	0	0	0	0	0	0	WBGene00206365
B0563.2	0	0	0	0	0	0	0	0	0	0	0	0	0	0	0	0	0	0	0	0	WBGene00006637
B0563.4	1.35975	0.869282	0	0.271281	0.213723	2.53017	3.81446	3.27906	4.71125	4.93643	0	0	0.446961	0.627807	0	5.43146	2.85111	4.40134	2.88917	2.9963	WBGene00006479
B0563.5	0	0	0	0	0	0	0	1.63953	0	0	0	0	0	0	0	0	0	0	0	0	WBGene00015262
B0563.6	0	0	0	0.271281	0	0	0	0	0	0.448767	0	0	0	0	0	0	0	0	0	0	WBGene00015263
B0563.7	0	0	0	0	0	0	0	0	0	0	0	0	0	0	0	0	0	0	0	0	WBGene00015264
B0563.8	0	0	0	0	0	0	0	0	0	0	0	0	0	0	0	0	0.950372	0	0.963057	0	WBGene00015265
B0563.9	0	0	0	0	0	0	0	0	0	0	0	0	0	0	0	0	0	0	0	0	WBGene00044687
B0564.1	21.756	24.3399	20.4959	16.8194	16.4566	16.0244	13.3506	9.83719	10.3647	17.5019	14.6717	14.4136	14.7497	18.5203	10.7016	11.3567	8.55334	4.40134	2.88917	4.49445	WBGene00007201
B0564.10	0	0	0	0	0	0	0	0	0	0	0	0	0	0	0	0	0	0	0	0	WBGene00006766
B0564.11	5.43899	7.38889	5.20532	8.95228	10.8999	7.5905	7.62893	0	1.8845	4.0389	1.12859	10.6205	6.25746	3.76684	9.57515	8.88784	6.6526	1.46711	1.92611	7.49075	WBGene00023421
B0564.2	1.35975	2.60785	5.85598	5.96819	4.06073	2.81129	1.90723	1.63953	2.82675	0.897533	2.25718	3.79305	2.23481	1.88342	2.25298	2.96261	5.70223	0	0.963057	0	WBGene00007202
B0564.3	0	0	0	0	0	0	0	0	0	0	0	0	0	0	0	0	0	0	0	0	WBGene00007203
B0564.4	0	0	0	0	0	0	0	0	0	0	0	0	0	0	0	0	0	0	0	0	WBGene00007204
B0564.6	0	0	0	0.542563	0	0.562259	0	0	0	0	0	0	0	0	0	0	0	0	0	0	WBGene00007206
B0564.7	9.51824	9.5621	4.55465	5.15435	7.26657	5.62259	3.81446	3.27906	2.82675	5.83397	4.51437	6.06888	6.70442	7.53369	3.66108	5.43146	4.75186	1.46711	1.92611	1.49815	WBGene00007207
B0564.9	0	0	0	0.542563	0	0.562259	0	0	0	0	0	0	0	0	0	0	0	0	0	0	WBGene00007208
BE0003N10.1	2.7195	5.65033	6.18131	4.88306	2.35095	2.24904	1.90723	6.55813	5.6535	6.7315	4.51437	3.79305	4.46961	6.59198	7.04055	4.93769	3.80149	2.93423	8.66751	5.9926	WBGene00015266
BE0003N10.2	1.35975	5.21569	7.48264	5.96819	5.55679	6.46598	13.3506	3.27906	5.6535	5.83397	4.51437	11.3792	7.59834	7.53369	5.35082	6.91276	5.70223	5.86846	7.70446	13.4833	WBGene00015267
BE0003N10.3	1.35975	2.60785	1.62666	0.813844	0.641168	2.24904	1.90723	0	0.94225	2.6926	0	0.75861	0.893923	2.51123	0.563244	1.97507	1.90074	2.93423	0.963057	1.49815	WBGene00015268
BE10.1	0	0	0	0	0	0	0	0	0	0	0	0	0	0	0	0	0	0	0	0	WBGene00007209
BE10.2	0	0	0	0	0.213723	0	0	0	0	0	0	0	0	0	0	0	0	0	0	0	WBGene00007210
BE10.3	0	0	0	0	0	0	0	0	0	0	0	0	0	0	0	0	0	0	0	0	WBGene00007211
BE10.4	1.35975	0	0	0	0	0	0	0	0	0.448767	0	0.75861	0	0	0	0	0	0	0	0	WBGene00007212
BE10.5	0	0	0	0	0	0	0	0	0	0	0	0	0	0	0	0	0	0	0	0	WBGene00044127
C01A2.1	0	0	0	0	0	0.281129	0	0	0	0	0	0	0	0	0	0	0	0	0	0	WBGene00007213
C01A2.2	0	0.434641	0	0	0	0	0	0	0	0	0	0	0	0	0	0	0	0	0	0	WBGene00007214
C01A2.3	4.07925	6.51961	3.90399	3.52666	3.20584	3.65468	0	1.63953	1.8845	2.6926	5.64296	7.5861	4.46961	3.13904	3.66108	1.48131	1.90074	0	0	1.49815	WBGene00007215
C01A2.4	6.79874	7.82354	13.664	12.7502	11.7547	14.3376	17.1651	8.19766	6.59575	13.9118	3.38578	12.1378	12.5149	10.0449	14.3627	11.3567	11.4045	10.2698	11.5567	10.487	WBGene00007216
C01A2.5	13.5975	13.9085	11.0613	16.2769	17.0978	11.5263	11.4434	9.83719	9.4225	10.7704	10.1573	15.9308	18.3254	9.73102	13.7995	11.8504	4.75186	7.33557	5.77834	10.487	WBGene00007217
C01A2.6	0	0	0	0.271281	0	0	0	0	0	0	0	0	0	0	0	0	0	0	0	0	WBGene00007218
C01A2.7	0	0	0	0	0	0	0	0	0	0	0	0	0	0	0	0	0	0	0	0	WBGene00007219
C01A2.9	0	0	0	0	0	0	0	0	0	0	0	0	0	0	0	0	0	0	0	0	WBGene00077546
C01B10.10	0	0	0	0	0	0	0	0	0	0	0	0	0	0	0	0	0	0	0	0	WBGene00015284
C01B10.11	0	0	0.325332	0	0	0	0	0	0	0	0	0	0	0	0	0	0	0	0	0	WBGene00044294
C01B10.3	0	0	0	0	0	0.281129	0	0	0	0	0	0	0	0	0	0.987537	0	0	0	0	WBGene00015278
C01B10.4	0	0	0	0	0	0	0	0	0	0	0	0	0	0	0	0	0	0	0	0	WBGene00015279
C01B10.44	0	0	0	0	0	0	0	0	0	0	0	0	0	0	0	0	0	0	0	0	WBGene00194839
C01B10.5	0	0.434641	1.95199	0.271281	0.427445	0	0	0	0	0	0	0	0	0.313904	0.281622	0.493769	0	0	0	0	WBGene00001858
C01B10.6	0	0	0	0	0	0	0	0	0	0.448767	0	0	0	0	0	0	0	0	0	0	WBGene00015280
C01B10.7	0	0	0	0	0	0	0	0	0	0	0	0	0	0	0	0	0	0	0	0	WBGene00015281
C01B10.8	21.756	12.1699	7.15731	8.95228	7.69402	6.46598	9.53616	1.63953	5.6535	8.0778	9.02873	5.31027	7.59834	12.5561	10.7016	4.93769	6.6526	7.33557	9.63057	7.49075	WBGene00015282
C01B10.9	6.79874	3.47713	8.78397	9.22357	10.4724	16.3055	1.90723	13.1163	17.9027	14.8093	5.64296	4.55166	8.49227	4.70856	9.0119	13.3318	6.6526	8.80269	15.4089	10.487	WBGene00015283
C01B12.1	0	0	0	0	0	0	0	0	0	0	0	0	0	0	0	0	0	0	0.963057	0	WBGene00005017
C01B12.2	0	0.434641	0.650665	0.271281	0.641168	13.7753	7.62893	4.9186	5.6535	8.0778	1.12859	0.75861	0.446961	0	2.81622	8.88784	8.55334	10.2698	3.85223	4.49445	WBGene00015285
C01B12.3	0	0	0	0	0	0	0	0	0	0	0	0	0	0	0	0	0	0	0	0	WBGene00015286
C01B12.4	0	0	0	0	0	0	0	0	0	0	0	0	0	0	0	0	0	0	0	0	WBGene00015287
C01B12.5	0	0	0	0	0	0	0	0	0	0	0	0	0	0	0	0	0	0	0	0	WBGene00015288
C01B12.8	0	5.65033	5.20532	6.51075	7.05285	5.62259	3.81446	8.19766	5.6535	5.3852	3.38578	4.55166	8.0453	5.33636	5.06919	7.40653	6.6526	5.86846	3.85223	4.49445	WBGene00015291
C01B4.1	0	0	0	0	0	0	0	0	0	0	0	0	0	0	0	0	0	0	0	0	WBGene00006283
C01B4.10	0	0	0	0	0	0	0	0	0	0	0	0	0	0	0	0	0	0	0	0	WBGene00006136
C01B4.3	0	0	0	0	0	0	0	0	0	0	0	0	0	0	0	0	0	0	0	0	WBGene00006284
C01B4.5	0	0	0	0	0	0	0	0	0	0	0	0	0	0	0	0	0	0	0	0	WBGene00005138
C01B4.6	0	0	0	0	0	1.12452	9.53616	3.27906	0	3.59013	0	0	0	0	0	2.96261	2.85111	0	0.963057	1.49815	WBGene00015270
C01B4.7	0	0	0.325332	0.271281	0	0.281129	0	0	0	0	1.12859	0	0	0	0	0.493769	0	0	0	0	WBGene00015271
C01B4.8	0	0	0	0	0	0	0	0	0	0	0	0	0	0	0	0	0	0	0	0	WBGene00015272
C01B4.9	0	0	0	0	0	0.281129	0	0	0	0	0	0.75861	0	0	0	0	0	0	0	0	WBGene00015273
C01B7.1	0	0	0	0	0.213723	1.12452	3.81446	1.63953	0.94225	1.79507	0	0	0	0	0	3.95015	4.75186	0	5.77834	4.49445	WBGene00015274
C01B7.3	0	0	0	0	0	0	0	0	0	0	0	0	0	0	0	0	0	0	0	0	WBGene00015275
C01B7.4	0	0	0.325332	0	0	0	0	0	0.94225	0	1.12859	0	0	0	0	0	0	0	0	0	WBGene00006467
C01B7.5	0	0	0	0	0	0	0	0	0	0	0	0	0	0	0	0	0	0	0	0	WBGene00015276
C01B7.6	0	0	0	0	0.213723	1.96791	3.81446	1.63953	0.94225	1.3463	0	0	0	0	0.563244	0.987537	0	1.46711	2.88917	4.49445	WBGene00004457
C01B7.7	0	0	0	0	0	0	0	0	0	0	0	0	0	0	0.281622	0	0	0	0	0	WBGene00015277
C01B9.1	0	0	0	0	0	0	0	0	0	0	0	0	0	0	0	0	0	0	0	0	WBGene00007220
C01B9.4	0	0	0	0	0	0	0	0	0	0	0	0	0	0	0	0	0	0	0	0	WBGene00194890
C01C10.1	0	0	0	0	0	1.96791	0	0	0	0.448767	0	0	0	0	0.281622	0.987537	0	0	0	0	WBGene00000523
C01C10.2	0	0	0	0	0	0	0	0	0	0	0	0	0	0	0	0	0	0	0	0	WBGene00015294
C01C10.3	0	0	0	0	0	0	0	0	1.8845	1.79507	0	0	0	0	0	0	0	0	0	0	WBGene00015295
C01C10.4	0	0	0	0.271281	0	0	0	0	0.94225	0	0	0	0	0	0	0	0	0	0	0	WBGene00000526
C01C4.1	0	0	0	0	0	0	0	0	0	0	0	0	0	0	0	0	0	0	0	0	WBGene00003739
C01C4.2	0	0	0	0	0	0	0	0	0	0	0	0	0	0	0	0	0	0	0	0	WBGene00015292
C01C4.3	0	0	0	0	0	0	0	0	0	0.448767	0	0	0	0	0	0	0	0	0	0	WBGene00015293
C01C7.1	2.7195	1.73856	10.0853	9.49485	8.97635	12.3697	15.2579	14.7558	20.7295	14.8093	2.25718	7.5861	5.36354	8.7893	14.3627	17.7757	30.4119	16.1383	24.0764	7.49075	WBGene00000186
C01F1.1	13.5975	19.9935	16.9173	16.5482	12.6096	13.4942	15.2579	16.3953	13.1915	13.9118	19.1861	25.7927	25.0298	15.3813	24.2195	10.8629	15.2059	5.86846	11.5567	8.9889	WBGene00015296
C01F1.2	2.7195	10.4314	13.664	12.7502	9.19008	5.90372	9.53616	9.83719	6.59575	8.97533	7.90014	11.3792	10.7271	11.9283	8.44866	6.91276	3.80149	4.40134	2.88917	2.9963	WBGene00015297
C01F1.3	0	0	0	0	0	0	0	0	0	0	0	0	0	0	0	0	0	0	0	0	WBGene00015298
C01F1.4	0	0	0	0.271281	0	0.562259	0	0	0.94225	0	0	0	0	0	0	0	0	0	1.92611	0	WBGene00015299
C01F1.5	0	0	0	0	0	0	0	0	0	0	0	0	0	0	0	0	0	0	0	0	WBGene00015300
C01F1.6	1.35975	0.434641	2.92799	1.62769	2.99212	4.49807	5.7217	6.55813	1.8845	4.0389	0	0	5.8105	5.33636	5.63244	6.41899	7.60297	10.2698	6.7414	4.49445	WBGene00015301
C01F4.2	0	0	0	0	0	0	0	0	0	0	0	0	0	0	0	0	0.950372	0	0	0	WBGene00015303
C01F6.1	2.7195	4.78105	8.13331	11.6651	13.4645	11.5263	5.7217	16.3953	16.0182	14.8093	3.38578	9.10332	6.70442	6.59198	15.7708	14.3193	16.1563	10.2698	16.372	4.49445	WBGene00007221
C01F6.14	1.35975	0.869282	0	0.271281	0.213723	0.281129	0	0	0	0	2.25718	0	0.446961	0.313904	0	0.493769	0	0	0	0	WBGene00219207
C01F6.2	0	0.434641	0.325332	0	0.641168	0.281129	0	0	0	0	0	0	0	0	0	0	0.950372	0	0	0	WBGene00007222
C01F6.4	2.7195	6.95425	10.736	11.9364	16.6704	16.5866	13.3506	11.4767	11.307	18.8482	5.64296	5.31027	9.83315	8.4754	13.7995	14.8131	17.1067	10.2698	7.70446	14.9815	WBGene00001413
C01F6.5	0	0.434641	0.975997	0	0	0.562259	5.7217	3.27906	5.6535	4.48767	0	0	0	0	0.281622	2.46884	1.90074	4.40134	6.7414	4.49445	WBGene00000120
C01F6.6	1.35975	0	0	0	0	0.562259	0	1.63953	0	0	0	0	0.446961	0.313904	0.844866	0	0	1.46711	0	1.49815	WBGene00006438
C01F6.8	31.2742	48.6798	36.4372	47.203	41.0348	40.7638	36.2374	31.1511	27.3252	32.76	37.2435	42.4822	41.1204	48.6551	31.26	29.1323	18.0571	27.8752	27.9287	17.9778	WBGene00002046
C01F6.9	32.634	39.1177	28.6292	27.1281	23.0821	17.7112	22.8868	24.593	35.8055	24.2334	42.8865	22.7583	35.7569	43.3187	23.6562	20.2445	19.9578	10.2698	13.4828	2.9963	WBGene00007223
C01G10.1	0	0	0	0	0	0	0	0	0	0	0	0	0	0	0	0	0	0	0	0	WBGene00007230
C01G10.10	5.43899	6.08497	5.53065	8.40972	2.99212	2.53017	3.81446	0	0.94225	3.14137	1.12859	4.55166	3.57569	2.82513	5.63244	2.46884	2.85111	2.93423	0	2.9963	WBGene00007237
C01G10.11	8.15849	12.6046	17.8933	23.0589	22.0134	25.3017	7.62893	31.1511	27.3252	29.6186	4.51437	15.9308	15.1967	16.323	23.9379	17.2819	19.9578	29.3423	17.335	23.9704	WBGene00006808
C01G10.12	0	2.1732	1.95199	2.71281	2.35095	1.96791	1.90723	0	2.82675	0.448767	2.25718	0	2.68177	2.82513	0.563244	0.987537	4.75186	0	0	1.49815	WBGene00001021
C01G10.14	0	0	0	0	0	0	0	0	0	0	0	0	0	0	0	0	0	0	0	0	WBGene00007239
C01G10.15	0	0	0	0	0	0	0	0	0	0	0	0	0	0	0	0	0	0	0	0	WBGene00007240
C01G10.16	0	0	0	0	0	0	0	0	0	0	0	0	0	0	0	0	0	0	0	0	WBGene00007241
C01G10.17	0	0	0	0	0	0	0	0	0	0	0	0	0	0	0	0	0	0	0	0	WBGene00044658
C01G10.18	0	0	0	0	0	0	0	0	0	0	0	0	0	0	0	0	0	0	0	0	WBGene00077583
C01G10.2	0	0	0	0	0	0	0	0	0	0	0	0	0	0	0	0	0	0	0	0	WBGene00005970
C01G10.3	0	0	0	0	0	0	0	0	0	0	0	0	0	0	0	0	0	0	0	0	WBGene00005969
C01G10.4	0	0	0	0	0	0	0	0	0	0	0	0	0	0	0	0	0	0	0	0	WBGene00007231
C01G10.5	0	0	0	0	0	0	0	0	0	0	0	0	0	0	0	0	0	0	0	0	WBGene00007232
C01G10.6	0	0	0	0	0	0	0	0	0	0	0	0	0	0	0	0	0	0	0	0	WBGene00007233
C01G10.7	4.07925	2.1732	6.50665	10.58	9.83124	8.43388	11.4434	6.55813	8.48025	12.5655	1.12859	6.82749	6.70442	6.27807	9.0119	5.43146	5.70223	1.46711	5.77834	2.9963	WBGene00007234
C01G10.8	20.3962	29.9902	28.6292	32.825	31.2035	23.0526	13.3506	9.83719	20.7295	23.7846	40.6293	46.2752	41.1204	41.7492	31.5417	18.7632	19.0074	22.0067	24.0764	17.9778	WBGene00007235
C01G10.9	0	0.434641	0.325332	0	0	0.843388	0	0	0	0	0	0	0	0.627807	0.563244	0	0.950372	0	0	0	WBGene00007236
C01G12.1	0	0	0	0	0	2.53017	1.90723	0	1.8845	0.448767	0	0	0	0	0	2.96261	1.90074	1.46711	0	1.49815	WBGene00007242
C01G12.10	0	0	0	0	0	0	0	0	0	0	0	0	0	0	0	0	0	0	0	0	WBGene00007250
C01G12.11	0	0	0	0	0	0	0	0	0	0	0	0	0	0	0	0	0	0	0	0	WBGene00007251
C01G12.13	0	0	0	0	0	0	0	0	0	0	0	0	0	0	0	0	0	0	0	0	WBGene00044333
C01G12.16	0	0	0	0	0	0	0	0	0	0	0	0	0	0	0	0	0	0	0	0	WBGene00219299
C01G12.2	0	0	0	0	0	0	0	0	0	0	0	0	0	0	0	0	0	0	0	0	WBGene00007243
C01G12.3	0	0	0	0	0	0	0	4.9186	0	1.3463	0	0	0	0	0	0.493769	0	1.46711	1.92611	0	WBGene00007244
C01G12.5	0	0	0	0	0	0	0	0	0	0	0	0	0	0	0	0	0	0	0	0	WBGene00007245
C01G12.6	0	0	0	0	0	0	0	0	0	0	0	0	0	0	0	0	0	0	0	0	WBGene00007246
C01G12.7	0	0	0	0	0	0	0	0	0	0	0	0	0	0	0	0	0	0	0	0	WBGene00007247
C01G12.8	0	0	0	0	0	0	0	0	0	0	0	0	0	0	0	0	0	0	0	0	WBGene00007248
C01G12.9	0	0	0	0	0	0	0	0	0	0	0	0	0	0	0	0	0	0	0	0	WBGene00007249
C01G5.2	33.9937	28.6863	37.4132	25.5004	15.388	2.81129	3.81446	1.63953	0.94225	0.897533	39.5007	43.9994	28.6055	17.2647	8.16704	0	0	0	0	0	WBGene00004179
C01G5.3	0	0	0	0	0	0	0	0	0	0.448767	0	0	0	0	0	0	0	0	0	0	WBGene00015305
C01G5.4	0	0	0	0	0	0	0	0	0	0	0	0	0	0	0	0	0	0	0	0	WBGene00015306
C01G5.5	0	5.65033	8.78397	6.78203	8.76263	7.5905	5.7217	3.27906	6.59575	10.7704	0	6.06888	7.15138	3.13904	7.88541	5.43146	3.80149	7.33557	7.70446	5.9926	WBGene00015307
C01G5.6	8.15849	8.69282	10.736	13.8353	14.9606	15.4621	11.4434	3.27906	9.4225	16.6044	3.38578	6.82749	12.5149	11.3005	12.9546	9.3816	5.70223	7.33557	5.77834	5.9926	WBGene00015308
C01G5.7	0	0	0	0	0	0	0	0	0	0	0	0	0	0	0	0	0	0	0	0	WBGene00015309
C01G5.8	4.07925	1.30392	6.18131	6.51075	4.91562	6.46598	0	9.83719	2.82675	2.6926	3.38578	3.03444	4.91657	4.39465	7.60379	3.95015	9.50372	1.46711	5.77834	5.9926	WBGene00015310
C01G5.9	0	0	0.325332	0	0	0.281129	0	0	0	0	0	0	0	0	0	0	0	0	0	0	WBGene00015311
C01G6.1	1.35975	0.869282	6.83198	0.542563	0.427445	0.562259	0	1.63953	0	1.3463	3.38578	0.75861	0.446961	0.941711	0.844866	1.48131	0.950372	0	0	0	WBGene00000170
C01G6.2	0	0	0	0	0	0	0	0	0	0	0	0	0	0	0	0	0	0	0	0	WBGene00007224
C01G6.3	2.7195	0.434641	1.30133	0.813844	26.7153	49.7599	36.2374	57.3836	47.1125	52.0569	2.25718	1.51722	0.893923	4.39465	23.9379	33.0825	31.3623	39.6121	29.8548	14.9815	WBGene00007225
C01G6.4	2.7195	4.78105	8.78397	11.9364	10.045	11.2452	19.0723	24.593	19.7872	14.8093	7.90014	6.06888	12.5149	4.39465	6.75893	11.3567	17.1067	20.5396	15.4089	8.9889	WBGene00007226
C01G6.5	5.43899	12.1699	17.5679	12.2077	16.0292	13.2131	20.9796	16.3953	16.9605	16.1556	4.51437	11.3792	12.068	9.41711	15.4892	26.6635	18.0571	27.8752	19.2611	29.963	WBGene00007227
C01G6.6	12.2377	14.3431	17.8933	21.4312	16.0292	17.9923	13.3506	13.1163	20.7295	13.0142	11.2859	16.6894	17.4315	14.4396	24.5011	15.3068	15.2059	24.9409	21.1873	17.9778	WBGene00006510
C01G6.7	0	0	0	0	0	0	0	0	0	0	0	0	0	0	0	0	0	0	0	0	WBGene00007228
C01G6.8	0	0	0	0	1.9235	11.8074	9.53616	6.55813	11.307	10.3216	0	0	0	0.941711	5.91406	16.7881	18.0571	11.7369	8.66751	16.4796	WBGene00000289
C01G6.9	0	0	0.325332	0	0	0	0	0	0	0	0	0	0	0	0	0	0	0	0.963057	0	WBGene00007229
C01G8.1	5.43899	5.21569	9.43464	39.3358	73.5206	72.2503	76.2893	45.9069	45.228	43.5304	5.64296	4.55166	20.1133	29.193	52.6633	66.165	88.3846	63.0859	42.3745	46.4426	WBGene00015312
C01G8.2	0	1.30392	0.650665	2.17025	2.35095	2.53017	1.90723	1.63953	0.94225	0.897533	0	1.51722	0.893923	1.25561	2.81622	2.46884	0.950372	1.46711	4.81529	2.9963	WBGene00000540
C01G8.3	0	8.25818	6.50665	14.3779	13.2508	14.6187	3.81446	1.63953	4.71125	11.2192	5.64296	6.82749	14.7497	8.4754	8.44866	7.40653	10.4541	16.1383	16.372	14.9815	WBGene00000965
C01G8.4	2.7195	4.34641	2.27733	4.88306	3.41956	3.37355	9.53616	1.63953	2.82675	4.48767	0	3.03444	5.8105	2.51123	1.97135	1.48131	4.75186	1.46711	1.92611	0	WBGene00001022
C01G8.5	14.9572	32.1634	26.0266	26.043	22.0134	22.4904	26.7013	14.7558	9.4225	21.5408	15.8003	22.7583	21.4541	29.8209	23.3746	20.2445	14.2556	10.2698	14.4459	7.49075	WBGene00001333
C01G8.6	36.7132	27.817	14.9653	16.2769	9.61752	6.74711	0	3.27906	4.71125	6.7315	19.1861	20.4825	14.3028	7.53369	8.44866	4.44392	1.90074	1.46711	0	0	WBGene00015313
C01G8.9	0	0	0.975997	0.271281	0.427445	1.12452	0	0	0.94225	0.448767	0	0.75861	0	0.941711	0.563244	0.493769	0	1.46711	0	0	WBGene00002717
C01H6.1	0	0	0	0	0	0	0	0	0	0	0	0	0	0	0	0	0	0	0	0	WBGene00000637
C01H6.2	0	0	0	0	0	0.281129	0	0	0	0.448767	0	0	0	0	0	0	0	0	0	0	WBGene00007252
C01H6.3	0	0	0	0	0	0.281129	0	0	0	0	0	0	0	0	0	0	0	0	0	0	WBGene00007253
C01H6.4	0	0	0	0	0	0	0	0	0	0.448767	0	0	0	0	0	0	0	0	0	0	WBGene00007254
C01H6.5	1.35975	0.434641	0.325332	1.35641	1.28234	0.562259	1.90723	0	0.94225	1.3463	0	1.51722	0.446961	0.941711	0.563244	0.493769	0.950372	0	0.963057	1.49815	WBGene00003622
C01H6.6	0	0.434641	0	0	0	0	0	0	0	0	0	0	0.446961	0	0	0	0	0	0	0	WBGene00007255
C01H6.7	9.51824	9.12746	15.2906	17.0907	20.3037	19.1168	9.53616	14.7558	26.383	17.5019	5.64296	18.9653	11.174	9.73102	22.5298	23.7009	26.6104	7.33557	23.1134	19.4759	WBGene00007256
C01H6.8	0	0	0.325332	0	0	0	0	0	0	0	0	0	0	0	0	0	0	0	0	0	WBGene00007257
C01H6.9	6.79874	3.04249	3.90399	4.61178	5.55679	2.81129	3.81446	0	0	2.24383	4.51437	2.27583	3.12873	4.70856	2.5346	5.92522	3.80149	1.46711	5.77834	2.9963	WBGene00007258
C02A12.1	0	0	0	0	0	0	0	0	0	0	0	0	0	0	0	0	0	0	0	0	WBGene00001781
C02A12.10	0	0	0	0	0	0	0	0	0	0	0	0	0	0	0	0	0	0	0	0	WBGene00044090
C02A12.2	0	0	0	0	0	0	0	0	0	0	0	0	0	0	0	0	0	0	0	0	WBGene00015315
C02A12.3	0	0	0	0	0	0	0	0	0	0	0	0	0	0	0	0	0	0	0	0	WBGene00015316
C02A12.4	0	0	0	0	0	0	0	0	0	0.448767	0	0	0	0	0	0	0	0	0	0	WBGene00003096
C02A12.5	0	0	0	0	0	0	0	0	0	0	0	0	0	0	0	0.493769	0	0	0	0	WBGene00015317
C02A12.6	0	0	0	0	0	0	0	0	0	0	0	0	0	0	0	0	0	0	0	0	WBGene00015318
C02A12.8	0	0	0	0	0	0	0	0	0	0	0	0	0	0	0	0	0	0	0	0	WBGene00044088
C02A12.9	0	0	0	0	0	0	0	0	0	0	0	0	0	0	0	0	0	0	0	0	WBGene00044089
C02B10.1	28.5547	26.5131	19.1946	22.7876	19.235	15.181	20.9796	18.0349	15.076	18.3994	25.9576	12.1378	17.4315	21.9733	21.9665	16.2944	18.0571	10.2698	19.2611	11.9852	WBGene00015326
C02B10.2	5.43899	8.25818	16.2666	13.2928	14.1057	10.6829	5.7217	13.1163	21.6717	17.0531	6.77155	9.86193	12.9619	11.9283	8.73028	11.3567	11.4045	13.204	16.372	14.9815	WBGene00015327
C02B10.3	0	0	0	1.35641	1.06861	0.281129	1.90723	0	0	0	0	0	0.446961	1.56952	0.281622	0.987537	2.85111	0	0	1.49815	WBGene00015328
C02B10.4	69.3472	60.8497	57.9092	72.9747	74.5892	69.1578	74.3821	67.2208	99.8784	88.8558	42.8865	65.9991	65.7033	56.5027	67.8709	61.2273	70.3275	92.4282	60.6726	59.926	WBGene00015329
C02B10.5	5.43899	5.21569	17.5679	16.8194	12.8234	13.2131	13.3506	14.7558	6.59575	8.52656	4.51437	15.1722	14.3028	11.3005	15.7708	16.7881	10.4541	8.80269	12.5197	4.49445	WBGene00015330
C02B10.6	0	0	0	0	0	0	0	0	0	0	0	0	0	0	0	0	0	0	0	0	WBGene00015331
C02B4.1	0	0	0	0	0	0	0	0	0	0	0	0	0	0	0	0	0	0	0	0	WBGene00000082
C02B4.2	0	0	0	0	0	1.68678	0	3.27906	1.8845	2.24383	0	0	0	0	0	2.96261	0.950372	0	2.88917	2.9963	WBGene00003616
C02B4.3	0	0	0	0	0	0	0	0	0	0	0	0	0	0	0	0	0	0	0	0	WBGene00007259
C02B4.4	0	0	0	0	0	0	0	0	0	0	0	0	0	0	0	0	0	0	0	0	WBGene00045386
C02B8.1	0	0.434641	0	0	0.213723	0	0	0	0	0	1.12859	0	0	0	1.12649	0.493769	0	0	0	0	WBGene00015320
C02B8.2	0	0	0	0	0	0	0	0	0	0	0	0	0	0	0	0	0	0	0	0	WBGene00015321
C02B8.3	0	0	0	0	0	0	0	0	0	0	0	0	0	0	0	0	0	0	0	0	WBGene00015322
C02B8.4	0	0	0	0	0	0	0	0	0	0	0	0	0	0	0	0	0	0	0	0	WBGene00001953
C02B8.5	0	0	0	0	0	0	0	0	0	0	0	0	0	0	0	0	0	0	0	0	WBGene00015323
C02B8.6	0	0	0	0	0	0	1.90723	0	0	0	0	0	0	0	0	0	0	0	0	0	WBGene00015324
C02B8.7	0	0	0	0	0	0	0	0	0	0	0	0	0	0	0	0	0	0	0	0	WBGene00015325
C02C2.1	0	0	0	0	0	0.281129	0	0	0	0	0	0	0	0	0	0	0	0	0	0	WBGene00015332
C02C2.3	0	0	0	0	0	0	0	0	0	0	0	0	0	0	0	0	0	0	0	0	WBGene00000845
C02C2.4	0	0	0	0	0	0	0	0	0	0	0	0	0	0	0	0	0	0	0	0	WBGene00015333
C02C2.5	0	0	0	0	0	0	0	0	0	0	0	0	0	0	0	0	0	0	0	0	WBGene00015334
C02C6.1	0	0	0	0	0.213723	6.46598	1.90723	4.9186	8.48025	5.3852	0	0	0	0	3.66108	4.44392	1.90074	7.33557	7.70446	10.487	WBGene00001130
C02C6.2	0	0	0	0	0	0	0	0	0	0	0	0	0	0	0	0	0	0	0	0	WBGene00007260
C02C6.3	0	0	1.30133	0.271281	0	0.562259	0	1.63953	1.8845	2.24383	0	0	0	0	0	1.97507	1.90074	1.46711	3.85223	1.49815	WBGene00007261
C02D4.1	0	0	0	0	0	0	0	0	0	0	0	0	0	0	0	0	0	0	0	0	WBGene00007262
C02D4.2	0	0	0	0	0	0	0	0	0	0	0	0	0	0	0	0	0	0	0	0	WBGene00004777
C02D5.1	0	0	0	0	0	0	0	0	0	0	0	0	0	0	0	0	0	0	0	0	WBGene00015335
C02D5.2	0	0	0.325332	0	0	0	0	0	0.94225	0	0	0	0	0	0	0	0	0	0	0	WBGene00015336
C02D5.3	0	0	0	0	0	0	0	0	0	0	0	0	0	0	0	0	0	0	0	0	WBGene00015337
C02D5.4	1.35975	0	0	0.271281	0	11.2452	5.7217	6.55813	11.307	11.6679	0	0	0	0	7.04055	13.3318	12.3548	7.33557	13.4828	11.9852	WBGene00043097
C02E11.1	0	0	1.30133	0.542563	1.28234	35.1412	53.4025	26.2325	21.6717	21.9896	2.25718	2.27583	0.446961	0.627807	8.73028	34.5638	24.7097	45.4806	36.5962	17.9778	WBGene00015344
C02E7.1	0	0	0	0	0	0	0	0	0	0	0	0	0	0	0	0	0	0	0	0	WBGene00015338
C02E7.10	0	0	0	0	0	0	0	0	0	0	0	0	0	0	0	0	0	0	0	0	WBGene00015342
C02E7.13	0	0	0	0	0	0	0	0	0	0	0	0	0	0	0	0	0	0	0	0	WBGene00006244
C02E7.2	0	0	0	0	0	0	0	0	0	0	0	0	0	0	0	0	0	0	0	0	WBGene00005246
C02E7.3	0	0	0	0	0	0	0	0	0	0	0	0	0	0	0	0	0	0	0	0	WBGene00005245
C02E7.4	0	0	0	0	0	0	0	0	0	0	0	0	0	0	0	0	0	0	0	0	WBGene00005247
C02E7.5	0	0	0	0	0	0	0	0	0	0	0	0	0	0	0	0	0	0	0	0	WBGene00005248
C02E7.6	0	0	0	0	0	0	0	0	0	0	0	0	0	0	0	0	0	0	0	0	WBGene00015339
C02E7.7	0	0	0	0	0	0	0	0	0	0	0	0	0	0	0	0	0	0	0	0	WBGene00015340
C02E7.8	0	0	0	0	0	0	0	1.63953	0	0	0	0	0	0	0	0	0	0	0	0	WBGene00015341
C02E7.9	0	0	0	0	0	0	0	0	0	0	0	0	0	0	0	0	0	0	0	0	WBGene00006238
C02F12.1	0	0	0	0	0	0	0	0	0	0	0	0	0	0	0	0	0	0	0	0	WBGene00006643
C02F12.10	0	0	0	0	0	0	0	0	0	0	0	0	0	0	0	0.493769	0	0	0	0	WBGene00045215
C02F12.3	0	0	0	0	0	0	0	0	0	0	0	0	0	0	0	0	0	0	0	0	WBGene00015354
C02F12.4	1.35975	0	0	0	0.213723	2.24904	3.81446	4.9186	5.6535	5.3852	0	0	0	0	0.844866	4.44392	8.55334	4.40134	3.85223	2.9963	WBGene00006431
C02F12.5	0	0	0	0	0	0	0	0	0	0	0	0	0	0	0	0	0	0	0	0	WBGene00015355
C02F12.7	0	0	0	0	0	0	0	0	0	0.448767	0	0	0	0	0	0	0.950372	0	0	0	WBGene00015356
C02F12.8	1.35975	0	0.325332	0	1.06861	8.43388	3.81446	0	8.48025	7.18027	0	0	0	0	2.5346	6.41899	7.60297	1.46711	7.70446	4.49445	WBGene00015357
C02F12.9	0	0	0	0	0	0	0	0	0	0	0	0	0	0	0	0	0	0	0	0	WBGene00015358
C02F4.1	4.07925	6.08497	13.3386	14.1066	16.2429	12.3697	13.3506	19.6744	12.2492	15.2581	4.51437	4.55166	15.1967	9.41711	15.2076	15.3068	17.1067	11.7369	10.5936	11.9852	WBGene00000419
C02F4.2	0	0	0	0	0	0.281129	1.90723	1.63953	0	0.897533	0	0	0	0	0.281622	2.96261	0	0	0	0	WBGene00006527
C02F4.4	0	0	0	0	0	0	0	0	0	0	0	0	0	0	0	0	0	0	0	0	WBGene00007264
C02F4.5	0	0	0	0	0	0	0	0	0	0	0	0	0	0	0	0	0	0	0	0	WBGene00007265
C02F5.1	8.15849	3.04249	1.30133	5.96819	7.26657	4.49807	11.4434	4.9186	6.59575	4.93643	0	1.51722	2.68177	4.39465	5.06919	4.93769	0.950372	2.93423	4.81529	5.9926	WBGene00002231
C02F5.10	1.35975	0.869282	0	0	0	0.562259	0	0	0	0	1.12859	0.75861	0.446961	0	0	0	0	0	0	0	WBGene00015351
C02F5.11	0	0	0.325332	0	0	0	0	0	0	0	0	0	0	0	0	0	0	0	0	0	WBGene00006628
C02F5.12	0	0.434641	0.325332	0.271281	0.213723	7.30937	17.1651	4.9186	1.8845	4.93643	1.12859	0	0	0.941711	1.68973	5.43146	4.75186	1.46711	4.81529	7.49075	WBGene00015352
C02F5.13	8.15849	9.5621	6.50665	11.1225	11.3273	11.5263	15.2579	6.55813	13.1915	25.1309	5.64296	8.34471	7.59834	5.65027	9.29352	11.8504	7.60297	11.7369	4.81529	11.9852	WBGene00015353
C02F5.14	0	0	0	0	0	0	0	0	0	0	0	0	0	0	0	0	0	0	0	0	WBGene00044445
C02F5.2	0	0	0	0	0	0	0	0	0	0	0	0	0	0	0	0	0	0	0	0	WBGene00015345
C02F5.3	9.51824	12.6046	9.43464	10.0374	13.892	7.87163	15.2579	9.83719	5.6535	11.6679	13.5431	5.31027	11.174	21.0316	14.926	11.8504	9.50372	1.46711	9.63057	2.9963	WBGene00015346
C02F5.4	2.7195	12.1699	12.688	10.8513	12.1822	11.5263	11.4434	8.19766	5.6535	9.4241	7.90014	4.55166	4.46961	7.84759	8.73028	5.92522	4.75186	5.86846	3.85223	1.49815	WBGene00015347
C02F5.5	0	0	0	0	0	0	0	0	0	0	0	0	0	0	0	0	0	0	0	0	WBGene00015348
C02F5.6	0	3.04249	1.95199	1.89897	3.20584	2.53017	0	0	2.82675	3.14137	2.25718	3.03444	2.23481	2.51123	2.25298	3.45638	0.950372	1.46711	2.88917	1.49815	WBGene00015349
C02F5.7	0	3.91177	3.90399	2.44153	2.13723	1.68678	3.81446	0	3.769	0.448767	1.12859	0	3.57569	1.88342	1.68973	0.493769	0.950372	0	1.92611	0	WBGene00015350
C02F5.8	0	0	0	0	0	0	0	0	0	0	0	0	0	0	0	0	0	0	0	0	WBGene00006627
C02F5.9	36.7132	46.9412	57.5838	62.9373	57.2777	47.2298	38.1446	85.2557	83.8602	62.8273	46.2723	51.5855	44.2492	61.839	49.2838	53.8208	73.1786	41.0792	82.8229	70.413	WBGene00003952
C02G6.1	0	0	0	0	0	0	0	0	0	0	0	0	0	0	0	0	0	0	0	0	WBGene00015359
C02G6.2	0	0	0	0	0	0	0	0	0	0	0	0	0	0	0	0	0	0	0	0	WBGene00015360
C02G6.3	0	0	0	0	0	0	0	0	0	0	0	0	0	0	0	0	0	0	0	0	WBGene00044803
C02H6.1	0	0	0	0	0	0	0	0	0	0	0	0	0	0	0	0	0	0	0	0	WBGene00015361
C02H6.2	0	0	0	0	0	0	0	0	0	0	0	0	0	0	0	0	0	0	0	0	WBGene00015362
C02H7.1	0	0	0	0	0	0	0	1.63953	0	0	0	0	0	0	0	0	0	0	0	0	WBGene00001127
C02H7.2	0	0	0	0	0	0	0	0	0	0	0	0	0	0	0	0	0	0	0	0	WBGene00015364
C02H7.3	0	0	0	0	0	0	0	0	0	0	0	0	0	0	0	0	0	0	0	0	WBGene00000086
C03A3.1	0	0	0	0	0	0	0	0	0	0	0	0	0	0	0	0	0	0	0	0	WBGene00007266
C03A3.2	0	0	0	1.08513	0.213723	7.87163	13.3506	14.7558	12.2492	8.97533	1.12859	0	0	1.56952	1.40811	8.39407	19.0074	11.7369	14.4459	8.9889	WBGene00007267
C03A3.3	0	0	0	0	0	0	0	0	0	0	0	0	0	0	0	0	0	0	0	0	WBGene00007268
C03A7.10	0	0	0	0	0	0	0	0	0	0	0	0	0	0	0	0	0	0	0	0	WBGene00015368
C03A7.11	0	0	0	0	0	0	0	0	0	0	0	0	0	0	0	0	0	0	0	0	WBGene00015369
C03A7.12	0	0	0	0	0.213723	0	0	0	0	0	0	0	0	0	0	0	0	0	0	0	WBGene00015370
C03A7.13	0	0	0	0	0	0	0	0	0	0	0	0	0	0	0	0	0	0	0	0	WBGene00015371
C03A7.14	0	0	0	0	0	0	0	0	0	0	0	0	0	0	0	0	0	0	0	0	WBGene00000031
C03A7.2	0	0.434641	0	0	0.213723	0	0	0	0	0	0	0	0	0	0	0	0	0	0	0	WBGene00015366
C03A7.3	0	0	0	0	0	0	0	0	0	0	0	0	0	0	0	0	0	0	0	0	WBGene00005887
C03A7.4	0	0	0	0	0	0	0	0	0	0	0	0	0	0	0	0	0	0	0	0	WBGene00004099
C03A7.5	0	0	0	0	0	0	0	0	0	0	0	0	0	0	0	0	0	0	0	0	WBGene00005929
C03A7.6	0	0	0	0	0	0	0	0	0	0	0	0	0	0	0	0	0	0	0	0	WBGene00005930
C03A7.7	0	0	0	0	0	0	0	0	0	0	0	0	0	0	0	0	0	0	0	0	WBGene00000029
C03A7.8	0	0	0	0	0	0	0	0	0	0	0	0	0	0	0	0	0	0	0	0	WBGene00000030
C03A7.9	0	0	0	0	0	0	0	0	0	0	0	0	0	0	0	0	0	0	0	0	WBGene00015367
C03B1.1	0	0	0	0	0	0	0	0	0	0	0	0	0	0	0	0	0	0	0	0	WBGene00015372
C03B1.10	0	0	0	0	0	0	0	0	0	0	0	0	0	0	0	0	0	0	0	0	WBGene00015380
C03B1.12	4.07925	1.30392	5.20532	3.52666	2.7784	52.8523	53.4025	60.6627	56.535	54.3008	0	0.75861	0.446961	1.25561	18.0238	70.6089	58.923	74.8228	44.3006	46.4426	WBGene00003053
C03B1.13	0	0	0	0	0	0	0	0	0	0	0	0	0	0	0	0	0	0	0	0	WBGene00015381
C03B1.14	0	0	0	0	0	0	0	0	0	0	0	0	0	0	0	0	0	0	0	0	WBGene00015382
C03B1.2	0	0	0	0	0	0	0	0	0	0	0	0	0	0	0	0	0	0	0	0	WBGene00015373
C03B1.3	0	0	0	0	0	0	0	0	0	0	0	0	0	0	0	0	0	0	0	0	WBGene00015374
C03B1.4	0	0	0	0	0	0	0	0	0	0	0	0	0	0	0	0	0	0	0	0	WBGene00015375
C03B1.5	0	0	0	0	0	0	0	0	0	0	0	0	0	0	0	0	0	0	0	0	WBGene00015376
C03B1.6	0	0	0	0	0	0	0	0	0	0	0	0	0	0	0	0	0	0	0	0	WBGene00015377
C03B1.7	0	0	0	0	0	1.40565	0	0	0	0	0	0	0	0	0.281622	1.48131	0.950372	0	0	0	WBGene00015378
C03B1.9	0	0	0	0	0	0	0	0	0	0	0	0	0	0	0	0	0	0	0	0	WBGene00015379
C03B8.2	0	0.869282	1.62666	1.35641	1.49606	0.843388	0	0	0	0	2.25718	2.27583	0.893923	0.627807	0.563244	0.493769	0	0	0	0	WBGene00015385
C03B8.3	0	0	0	0	0	0	0	0	0	0	0	0	0	0	0	0	0	0	0	0	WBGene00015386
C03B8.4	9.51824	6.51961	13.9893	13.2928	12.6096	15.181	9.53616	13.1163	9.4225	8.52656	13.5431	9.86193	11.621	13.184	20.5584	11.8504	6.6526	10.2698	13.4828	7.49075	WBGene00003002
C03C10.1	12.2377	15.6471	15.616	18.1758	19.0213	15.181	17.1651	16.3953	18.845	11.2192	13.5431	23.5169	12.9619	26.9957	21.1216	10.8629	9.50372	13.204	22.1503	22.4722	WBGene00002202
C03C10.2	0	0	0	0	0	0	0	0	0	0	0	0	0	0	0	0	0	0	0	0	WBGene00007269
C03C10.3	20.3962	25.6438	24.3999	30.3835	87.1989	116.388	175.465	132.802	177.143	132.835	23.7004	29.5858	25.9238	37.3545	63.6466	99.7413	113.094	82.1584	70.3032	71.9112	WBGene00004392
C03C10.4	12.2377	9.12746	12.3626	20.0748	21.3723	18.8357	24.794	19.6744	15.076	21.9896	9.02873	11.3792	15.1967	14.1257	13.2362	13.3318	21.8585	10.2698	12.5197	8.9889	WBGene00007270
C03C10.5	0	0	0	0	0	0	0	0	0	0	0	0	0	0	0	0	0	0	0	0	WBGene00007271
C03C10.7	0	0.434641	0	0	0	0	0	0	0.94225	0	0	0	0	0	0	0	0	0	0	0	WBGene00007273
C03C10.9	0	0	0	0	0	0	0	0	0	0	0	0	0	0	0	0	0	0	0	0	WBGene00185075
C03C11.1	0	0	0	0	0	0	0	0	0	0	0	0	0	0	0	0	0	0	0	0	WBGene00007274
C03C11.2	0	0	0	0	0	0.843388	1.90723	1.63953	0	0	0	0	0	0.313904	0	0	0.950372	0	0	0	WBGene00001483
C03D6.1	0	0	0.325332	0	0.213723	0.281129	0	0	0	0	0	0	0	0	0	0	0	0	0	0	WBGene00007275
C03D6.3	4.07925	8.69282	9.10931	7.3246	4.48818	6.74711	3.81446	3.27906	6.59575	5.83397	3.38578	6.06888	3.12873	2.82513	7.60379	5.92522	3.80149	4.40134	6.7414	1.49815	WBGene00000466
C03D6.4	19.0365	26.9477	29.2799	31.4686	33.127	32.611	38.1446	40.9883	32.0365	36.3501	23.7004	25.0341	33.5221	33.9016	41.9617	36.5389	36.1141	32.2765	49.1159	40.45	WBGene00003800
C03D6.5	4.07925	13.4739	9.43464	13.8353	16.6704	7.87163	3.81446	6.55813	13.1915	8.97533	12.4145	18.9653	10.7271	7.53369	14.3627	10.8629	5.70223	7.33557	10.5936	8.9889	WBGene00007277
C03D6.6	0	1.73856	3.90399	8.13844	24.1507	22.2092	7.62893	13.1163	9.4225	9.4241	1.12859	0.75861	2.23481	6.90588	15.7708	13.3318	7.60297	1.46711	14.4459	11.9852	WBGene00007278
C03D6.8	43.512	31.2941	32.5332	20.0748	13.892	15.4621	11.4434	8.19766	6.59575	9.87286	31.6006	34.1375	22.3481	26.6818	14.6443	9.3816	3.80149	4.40134	9.63057	2.9963	WBGene00004437
C03E10.1	0	0	0	0	0	0	0	0	0	0	0	0	0	0	0	0	0	0	0	0	WBGene00007279
C03E10.3	0	0	0	0	0	0	0	0	0	0	0	0	0	0	0	0	0	0	0	1.49815	WBGene00007281
C03E10.4	17.6767	10.4314	14.3146	22.5164	25.0056	23.3337	15.2579	27.8721	31.0942	42.1841	6.77155	21.2411	21.4541	16.6369	22.8114	23.2071	34.2134	22.0067	22.1503	28.4648	WBGene00001645
C03E10.5	0	0	0	0	0	0	0	0	0	0	0	0	0	0	0	0	0	0	1.92611	0	WBGene00007282
C03E10.6	0	0	0	0	0	0	0	0	0	0	0	0	0	0	0	0.493769	0	0	0	2.9963	WBGene00007283
C03F11.1	0	0	0	0	0	0	0	0	0	0	0	0	0	0	0	0	0	0	0	0	WBGene00015387
C03F11.2	0	0	0	0	0	0	0	0	0	0	0	0	0	0	0	0	0	0	0	0	WBGene00015388
C03F11.3	0	0	0	0	0.213723	0	0	0	0	0	0	0	0	0	0	0	0	0	0	0	WBGene00015389
C03F11.4	0	0	0	0	0.213723	0.281129	1.90723	0	0	0	1.12859	0	0	0	0	0.493769	0	2.93423	1.92611	0	WBGene00015390
C03G5.1	0	0	0.325332	0.271281	0	3.93581	11.4434	6.55813	3.769	5.83397	1.12859	0	0	0.627807	1.97135	8.88784	15.2059	11.7369	9.63057	10.487	WBGene00015391
C03G5.10	0	0	0	0	0	0	0	0	0	0	0	0	0	0	0	0	0	0	0	0	WBGene00044338
C03G5.11	0	0	0	0	0	0	0	0	0	0	0	0	0	0	0	0	0	0	0	0	WBGene00044339
C03G5.12	0	0	0	0	0	0	0	0	0	0	0	0	0	0	0	0	0	0	0	0	WBGene00044340
C03G5.13	0	0	0	0	0	0	0	0	0	0	0	0	0	0	0	0	0	0	0	0	WBGene00044357
C03G5.2	0	0	0.325332	0	0	0	0	0	0	0	0	0	0	0	0	0	0	0	0	0	WBGene00015392
C03G5.7	0	0	0	0	0	0	0	0	0	0	0	0	0	0	0	0	0	0	0	0	WBGene00001448
C03G5.8	0	0	0	0	0	0	0	0	0	0	0	0	0	0	0.281622	0	0	0	0	0	WBGene00023477
C03G5.9	0	0	0	0	0	0	0	0	0	0	0	0	0	0	0	0	0	0	0	0	WBGene00044337
C03G6.10	0	0	0	0	0	0	0	0	0	0	0	0	0	0	0	0	0	0	0	0	WBGene00015396
C03G6.11	0	0	0	0	0	0	0	0	0	0	0	0	0	0	0	0	0	0	0	0	WBGene00005439
C03G6.12	0	0	0	0	0	0	0	0	0	0	0	0	0	0	0	0	0	0	0	0	WBGene00015397
C03G6.13	0	0	0	0	0	0	0	0	0	0	0	0	0	0	0	0	0	0	0	0	WBGene00015398
C03G6.14	0	0	0	0	0	0	0	0	0	0	0	0	0	0	0	0	0	0	0	0	WBGene00015399
C03G6.15	0	0	0	0	0	0	0	0	0	0	0	0	0	0	0	0	0	0	0	0	WBGene00015400
C03G6.16	0	0	0	0	0	0	0	0	0	0	0	0	0	0	0	0	0	0	0	0	WBGene00015401
C03G6.17	0	0	0	0	0	0	0	0	0	0	0	0	0	0	0	0	0	0	0	0	WBGene00015402
C03G6.18	0	0	0	0	0	0	0	0	0	0	0	0	0	0	0	0	0	0	0	0	WBGene00005646
C03G6.19	0	0	0	0.271281	0	0	0	0	0	0.448767	0	0	0	0.313904	0	0	0	1.46711	0	0	WBGene00005647
C03G6.2	0	0	0	0	0	0	0	0	0	0	0	0	0	0	0	0	0	0	0	0	WBGene00005947
C03G6.3	0	0	0	0	0	0	0	0	0	0	0	0	0	0	0	0	0	0	0	0	WBGene00005602
C03G6.5	0	0	0	0	0	0	0	0	0	0	0	0	0	0	0	0	0	0	0	0	WBGene00015393
C03G6.6	0	0	0	0	0	0	0	0	0	0	0	0	0	0	0	0	0	0	0	0	WBGene00015394
C03G6.7	0	0	0	0	0	0	0	0	0	0	0	0	0	0	0	0	0	0	0	0	WBGene00005480
C03G6.8	0	0	0	0	0	0	0	0	0	0	0	0	0	0	0	0	0	0	0	0	WBGene00015395
C03G6.9	0	0	0	0	0	0	0	0	0	0	0	0	0	0	0	0	0	0	0	0	WBGene00005450
C03H12.1	0	0	0.325332	0	0	0.843388	0	3.27906	1.8845	4.48767	0	0	0	0	0	4.93769	0.950372	1.46711	0.963057	2.9963	WBGene00007284
C03H5.1	0	0	0	0	0	0	0	0	0	0	0	0	0	0	0	0	0	0	0	0	WBGene00015403
C03H5.2	9.51824	7.38889	5.53065	5.42563	8.33519	6.74711	5.7217	11.4767	7.538	5.83397	5.64296	12.8964	8.93923	5.65027	7.88541	5.92522	6.6526	5.86846	9.63057	2.9963	WBGene00015404
C03H5.3	14.9572	9.99674	8.78397	5.42563	5.34307	4.49807	1.90723	4.9186	2.82675	5.3852	6.77155	4.55166	4.91657	5.96417	4.22433	3.95015	4.75186	4.40134	4.81529	0	WBGene00015405
C03H5.4	0	0	0	0	0	0	0	0	0	0	0	0	0	0	0	0	0	0	0	0	WBGene00015406
C03H5.5	0	0	0	0.271281	0	0.281129	3.81446	0	1.8845	0	0	0	0	0	0.844866	0.493769	0	4.40134	0.963057	1.49815	WBGene00015407
C03H5.6	0	0	0	0	0	0	0	0	0	0	0	0	0	0	0	0	0	0	0	0	WBGene00015408
C03H5.7	0	0	0	0	0	0	0	0	0	0	0	0	0	0	0	0	0	0	0	0	WBGene00015409
C03H5.9	0	0	0	0	0	0	0	0	0	0	0	0	0	0	0	0	0	0	0	0	WBGene00206366
C04A11.1	0	0	0	0	0	0	0	0	0	0	0	0.75861	0	0	0	0	0	0	0	0	WBGene00007285
C04A11.2	0	0	0.325332	0	0	1.12452	0	0	4.71125	1.3463	0	0	0	0	0	0	2.85111	1.46711	0	0	WBGene00007286
C04A11.3	0	0	0	0	0	0	0	0	0	0	0	0	0	0	0.281622	0.493769	0	0	0	1.49815	WBGene00007287
C04A11.4	1.35975	0	0.325332	0.271281	0.854891	7.30937	3.81446	6.55813	5.6535	6.7315	0	0	0	0	2.25298	11.8504	6.6526	14.6711	12.5197	4.49445	WBGene00000074
C04A11.5	0	0	0	0	0	0	0	0	0	0	0	0	0	0	0	0	0	0	0	0	WBGene00007288
C04A2.1	0	0	0.975997	0	0.213723	0.562259	1.90723	0	0.94225	0	0	0	0	0.313904	0	0.987537	0	0	0	0	WBGene00015410
C04A2.15	0	0	0	0	0	0	0	0	0	0	0	0	0	0	0	0	0	0	0	0	WBGene00206529
C04A2.3	16.317	21.2974	16.2666	19.5323	30.5623	44.6996	55.3097	47.5464	37.69	40.389	19.1861	15.1722	16.0906	22.6011	44.2146	31.6012	37.0645	33.7436	37.5592	53.9334	WBGene00001194
C04A2.7	4.07925	23.9052	30.2559	40.9635	41.0348	44.1373	40.0519	59.0232	46.1702	57.4421	9.02873	23.5169	35.7569	29.507	45.3411	42.9579	64.6253	66.0202	49.1159	56.9297	WBGene00001023
C04B4.1	0	0	0	0	0	0	0	0	0	0	0	0	0	0	0	0	0	0	0	0	WBGene00007289
C04B4.2	0	0	0.650665	0.542563	2.35095	35.1412	20.9796	37.7092	32.9787	39.0427	1.12859	0	0	0.627807	20.2768	27.651	18.0571	13.204	24.0764	38.9519	WBGene00007290
C04B4.3	0	0	0	0	0	0	0	0	0	0	0	0	0	0	0	0	0	0	0	0	WBGene00007291
C04B4.4	0	0	0	0	0	0	0	0	0	0	0	0	0	0	0	0	0	0	0	0	WBGene00007292
C04B4.5	0	0	0	0	0	0	0	0	0	0	0	0	0	0	0	0	0	0	0	0	WBGene00007293
C04B4.6	0	0	0	0	0	0	0	0	0	0	0	0	0	0	0	0	0	0	0	0	WBGene00007294
C04C11.1	0	0	0	0	0	0	0	0	0	0	0	0	0	0	0	0	0	0	0	0	WBGene00007295
C04C11.2	1.35975	0	0.325332	0	0	1.12452	1.90723	8.19766	0.94225	4.93643	0	0.75861	0	0	0.281622	0.987537	0.950372	2.93423	0.963057	5.9926	WBGene00007296
C04C3.1	0	0	0	0	0	0	0	0	0	0	0	0	0	0	0	0	0	0	0	0	WBGene00015411
C04C3.2	0	0	0	0	0	0	0	0	0	0	0	0	0	0	0.281622	0.493769	0	0	0	0	WBGene00015412
C04C3.3	36.7132	27.3824	28.6292	20.8887	23.5095	15.7433	7.62893	14.7558	26.383	21.9896	21.4432	19.7239	16.9845	30.1348	20.5584	13.3318	25.66	26.4081	32.7439	22.4722	WBGene00015413
C04C3.4	0	0.434641	1.30133	0.542563	0.641168	0.281129	0	0	0	0	1.12859	1.51722	0.446961	0.313904	0	0.493769	0	0	0	0	WBGene00015414
C04C3.5	0	0.434641	0.325332	0	0	0.281129	0	0	0	0	2.25718	0.75861	0.446961	0	0.281622	0	0	0	0	0	WBGene00001119
C04C3.6	0	0	0	0	0	0	0	0	0	0	0	0	0	0	0	0	0	0	0	0	WBGene00015416
C04C3.7	0	0	0	0	0	0	0	0	0	0	0	0	0	0	0	0	0	0	0	0	WBGene00015417
C04C3.9	0	0	0	0	0	0	0	0	0	0	0	0	0	0	0	0	0	0	0	0	WBGene00195067
C04D8.1	5.43899	6.08497	13.0133	10.8513	15.388	10.964	9.53616	16.3953	14.1337	11.6679	3.38578	6.82749	13.8558	14.1257	11.5465	24.6884	12.3548	19.0725	22.1503	11.9852	WBGene00015418
C04E12.10	0	0	0	0	0	0	0	0	0	0	0	0	0	0	0	0	0	0	0	0	WBGene00015439
C04E12.11	0	0	0	0	0	0	0	0	0	0	0	0	0	0	0	0	0	0	0	0	WBGene00015440
C04E12.12	0	0	0	0	0	0	0	0	0	0.448767	0	0	0	0	0	0	0	0	0	0	WBGene00015441
C04E12.2	0	0	0	0	0	0	0	0	0	0	0	0	0	0	0	0	0	0	0	0	WBGene00015433
C04E12.4	0	0	0	0	0	0	0	0	0	0	0	0	0	0	0	0	0	0	0	0	WBGene00015434
C04E12.5	0	0	0	0	0	0	0	0	0	0	0	0	0	0	0	0	0	0	0	0	WBGene00015435
C04E12.6	0	0	0	0	0	0	0	0	0	0	0	0	0	0	0	0	0	0	0	0	WBGene00015436
C04E12.7	0	0	0	0	0	0	0	0	0	0	1.12859	0	0	0	0	0	0	0	0.963057	0	WBGene00015437
C04E12.8	0	0	0	0	0	0	0	0	0	0	0	0	0	0	0	0	0	0	0	0	WBGene00006012
C04E12.9	0	0	0	0	0	0	0	0	0	0	0	0	0	0	0	0	0	0	0	0	WBGene00015438
C04E6.10	0	0	0	0	0	0	0	0	0	0	0	0	0	0	0	0	0	0	0	0	WBGene00005093
C04E6.11	8.15849	14.7778	7.48264	12.4789	11.1136	9.27727	5.7217	11.4767	12.2492	8.52656	12.4145	14.4136	5.8105	8.7893	9.57515	11.8504	10.4541	14.6711	15.4089	8.9889	WBGene00015425
C04E6.13	0	0	0	0	0	0	0	0	0	0	0	0	0	0	0	0	0	0	0	0	WBGene00015427
C04E6.2	0	0	0	0	0	0	0	0	0	0	0	0	0	0	0	0	0	0	0	0	WBGene00015419
C04E6.3	0	0	0	0	0	0	0	0	0	0	0	0	0	0	0	0	0	0	0	0	WBGene00015420
C04E6.4	0	0	0	0	0	0	0	0	0	0	0	0	0	0	0	0	0	0	0	0	WBGene00015421
C04E6.5	0	0	0	0	0	0	0	0	0	0	0	0	0	0	0	0	0	0	0	0	WBGene00015422
C04E6.6	0	0	0	0	0	0	0	0	0	0	0	0	0	0	0	0	0	0	0	0	WBGene00001698
C04E6.7	0	0	0	0	0	0	0	0	0	0	0	0	0	0.313904	0	0	0	2.93423	4.81529	1.49815	WBGene00015423
C04E6.8	0	0	0	0	0	0	0	0	0	0	0	0	0	0	0	0	0	0	0	0	WBGene00015424
C04E6.9	0	0	0	0	0	0	0	0	0	0	0	0	0	0	0	0	0	0	0	0	WBGene00005094
C04E7.1	0	0	0	0	0	0	0	0	0	0	0	0	0	0	0	0	0	0	0	0	WBGene00015428
C04E7.2	0	0	0	0	0	1.96791	1.90723	0	1.8845	5.3852	0	0	0	0	0.281622	2.96261	0	0	0.963057	2.9963	WBGene00015429
C04E7.3	0	0	0	0	0	0	0	0	0	0	0	0.75861	0	0	0	0	0	0	0	0	WBGene00015430
C04E7.4	0	0	0	0	0	0.281129	0	0	0.94225	0.448767	0	0	0	0	0	0.987537	0	1.46711	0	0	WBGene00015431
C04E7.5	0	0	0	0	0	0	0	1.63953	0	0	0	0	0	0	0.281622	0	0	1.46711	0	0	WBGene00045270
C04F1.1	0	0	0	0	0	0	0	0	0	0	0	0	0	0	0	0	0	0	0	0	WBGene00015442
C04F1.3	0	0	0.650665	0	0	0	0	0	0	0	0	0	0	0	0	0	0	0	0	0	WBGene00002989
C04F12.1	0	0.434641	1.30133	0	1.06861	8.71501	13.3506	4.9186	7.538	10.7704	0	0	0.446961	0	4.78757	4.93769	11.4045	7.33557	9.63057	13.4833	WBGene00007297
C04F12.10	5.43899	5.65033	10.4106	12.2077	13.4645	11.2452	11.4434	19.6744	9.4225	17.9507	9.02873	8.34471	12.9619	7.53369	12.673	10.3691	10.4541	5.86846	3.85223	8.9889	WBGene00001405
C04F12.12	0	0	0	0	0	0	0	0	0	0	0	0	0	0	0	0	0	0	0	0	WBGene00077685
C04F12.16	0	0	0	0	0	0	0	0	0	0	0	0	0	0	0	0	0	0	0	0	WBGene00219286
C04F12.3	0	0	0	0	0	0.281129	0	0	0	0	0	0	0	0	0	0	0	0	0.963057	0	WBGene00002069
C04F12.4	611.887	370.314	298.33	256.361	200.686	224.06	240.311	116.407	79.149	22.8871	539.467	444.546	350.418	293.814	206.429	184.669	93.1364	36.6779	23.1134	14.9815	WBGene00004426
C04F12.5	6.79874	9.99674	8.45864	7.3246	7.69402	5.34146	5.7217	6.55813	5.6535	5.3852	15.8003	16.6894	8.0453	8.1615	4.50595	5.92522	5.70223	14.6711	1.92611	0	WBGene00007299
C04F12.6	0	0	0	0	0	0	0	0	0	0	0	0	0	0	0	0	0	0	0	0	WBGene00007300
C04F12.7	0	0	0	0	0	0	0	0	0	0	0	0	0	0	0	0	0	0	0	0	WBGene00007301
C04F12.8	0	0	0	0	0	0	0	0	0	0	0	0	0	0	0	0	0	0	0	0	WBGene00007302
C04F12.9	2.7195	0	0.325332	0.813844	1.49606	0.843388	1.90723	1.63953	2.82675	0.897533	0	0	0	0.627807	1.68973	3.45638	2.85111	1.46711	2.88917	7.49075	WBGene00007303
C04F2.1	0	0	0	0	0	0	0	0	0	0	0	0	0	0	0	0	0	0	0	0	WBGene00005300
C04F2.4	0	0	0	0	0	0	0	0	0	0	0	0	0	0	0	0	0	0	0	0	WBGene00005437
C04F5.1	5.43899	9.99674	9.43464	14.3779	12.8234	12.932	19.0723	18.0349	10.3647	12.5655	9.02873	8.34471	11.621	6.90588	16.3341	20.7383	10.4541	13.204	7.70446	20.9741	WBGene00004795
C04F5.2	0	0	0	0	0	0	0	0	0	0	0	0	0	0	0	0	0	0	0	0	WBGene00015444
C04F5.3	0	0	0	0	0	0	0	0	0	0	0	0	0	0	0	0	0	0	0	0	WBGene00006782
C04F5.4	0	0	0	0	0	0	0	0	0	0	0	0	0	0	0	0	0	0	0	0	WBGene00015446
C04F5.5	0	0	0	0	0	0	0	0	0	0	0	0	0	0	0	0	0	0	0	0	WBGene00015447
C04F5.6	0	0	0	0	0	0	0	0	0	0	0	0	0	0	0	0	0	0	0	0	WBGene00015448
C04F5.7	0	0	0	0	0	0	0	0	0	0	0	0	0	0	0	0	0	0	0	0	WBGene00015449
C04F5.8	12.2377	10.866	10.736	10.0374	10.4724	7.5905	5.7217	6.55813	8.48025	4.0389	16.9289	10.6205	11.174	12.5561	7.04055	5.92522	2.85111	2.93423	4.81529	5.9926	WBGene00015450
C04F5.9	2.7195	0.869282	1.30133	4.61178	4.27445	5.62259	1.90723	6.55813	2.82675	2.24383	2.25718	0.75861	2.68177	3.13904	4.50595	3.45638	4.75186	1.46711	1.92611	4.49445	WBGene00015451
C04F6.1	14.9572	0.869282	5.20532	0.271281	0	0.281129	0	0	0	0.897533	0	1.51722	0	0	0	0.493769	0	0	0	0	WBGene00006929
C04F6.3	0	0.434641	3.25332	0.271281	0.641168	0.562259	0	3.27906	1.8845	4.48767	0	0	0.446961	0.313904	0.844866	0.987537	2.85111	4.40134	7.70446	1.49815	WBGene00000503
C04F6.4	0	0	0	0.271281	0.213723	3.09242	5.7217	8.19766	9.4225	5.83397	0	0	0.446961	0	0.563244	6.41899	10.4541	2.93423	5.77834	10.487	WBGene00006810
C04F6.5	1.35975	0	0	0	0	1.40565	0	0	1.8845	0.897533	0	0	0	0	0.281622	0.493769	1.90074	1.46711	1.92611	0	WBGene00000990
C04F6.7	0	0	0	0	0	0	0	0	0	0	0	0	0	0	0	0	0	0	0	0	WBGene00195081
C04G2.1	0	0	0	0	0	0	0	0	0	0.448767	0	0	0	0	0	0	0	0	0	0	WBGene00007304
C04G2.10	0	1.30392	0.975997	0	0.427445	0	0	1.63953	0	0	0	0	0	0	0.281622	0	0	0	0	0	WBGene00007309
C04G2.11	0	0	0	0	0	0	0	0	0	0	0	0	0	0	0	0	0	0	0	0	WBGene00007310
C04G2.2	0	0	0	0	0	0	0	0	0	0	0	0	0	0	0	0	0	0	0	0	WBGene00007305
C04G2.4	0	0	0	0	0	0	0	0	0	0	0	0	0	0	0	0	0	0	0	0	WBGene00003432
C04G2.5	0	0	0	0	0	0	0	0	0	0	0	0	0	0	0	0	0	0	0	0	WBGene00007306
C04G2.6	19.0365	17.8203	13.3386	14.3779	11.7547	11.2452	9.53616	14.7558	16.0182	15.2581	12.4145	10.6205	12.068	13.8118	16.8973	15.8006	19.0074	17.6054	26.0025	8.9889	WBGene00001001
C04G2.7	0	0	0	0	0	0	0	0	0	0	0	0	0	0	0	0	0	0	0	0	WBGene00001204
C04G2.8	0	0	0	0	0	0	0	0	0	0	0	0	0	0	0	0	0	0	0	0	WBGene00007307
C04G2.9	0	0	0	0	0	0	0	0	0	0	0	0	0	0	0	0	0	0	0	0	WBGene00007308
C04G6.1	0	0	0	0	0	0	0	0	0	0	0	0	0	0	0	0	0	0	0	0	WBGene00003402
C04G6.10	0	0	0	0	0	0	0	0	0	0	0	0	0	0	0	0	0	0	0	0	WBGene00015458
C04G6.11	0	0	0	0	0	0	0	0	0	0	0	0	0	0	0	0	0	0	0	0	WBGene00015459
C04G6.13	0	0	0	0	0	0	0	0	0	0	0	0	0	0	0	0	0	0	0	0	WBGene00077489
C04G6.2	0	0	0	0	0	0.281129	0	0	0	0	0	0	0	0	0	0	0	0	0	0	WBGene00015453
C04G6.3	8.15849	9.12746	8.13331	10.8513	7.05285	5.06033	5.7217	3.27906	4.71125	5.3852	5.64296	12.1378	12.5149	7.53369	12.1097	6.41899	3.80149	2.93423	6.7414	8.9889	WBGene00004040
C04G6.4	2.7195	2.1732	2.27733	6.23947	2.7784	5.06033	5.7217	1.63953	2.82675	2.6926	2.25718	0	4.91657	1.88342	2.5346	6.91276	9.50372	2.93423	2.88917	2.9963	WBGene00015454
C04G6.5	0	0	0	0	0	0	0	0	0	0	0	0	0	0	0	0	0	0	0	0	WBGene00015455
C04G6.6	0	0.434641	0.975997	0.271281	0	0.281129	0	0	0	0	0	2.27583	0.446961	0.941711	0.563244	0	0	0	0	0	WBGene00015456
C04G6.7	0	0	0	0	0	0.281129	0	0	0	0	0	0	0	0	0	0	0	0	0	0	WBGene00015457
C04H4.1	0	0	0	0	0	0	0	0	0	0	0	0	0	0	0	0	0	0	0	0	WBGene00007311
C04H5.1	1.35975	0.869282	0.975997	0	0	0.281129	0	0	0	0	0	0.75861	0	0.313904	0	0	0	0	0	0	WBGene00007312
C04H5.2	0	0	0	0	0	0	0	0	0	0.448767	0	0	0	0	0	0	0	0	0	0	WBGene00007313
C04H5.3	0	0	0	0	0	0	0	0	0	0	0	0	0	0	0	0	0	0	0	0	WBGene00007314
C04H5.6	5.43899	9.12746	9.43464	7.59588	5.55679	8.43388	5.7217	3.27906	5.6535	10.3216	6.77155	14.4136	7.59834	12.2422	10.42	11.8504	5.70223	2.93423	12.5197	8.9889	WBGene00003392
C04H5.7	0	0	0	0	0	0	0	0	0	0	0	0	0	0	0	0	0	0	0	0	WBGene00007315
C04H5.8	0	0	0	0	0	0	0	0	0	0	0	0	0	0	0	0	0	0	0	0	WBGene00007316
C05A2.1	0	0	0	0	0	0	0	0	0	0.448767	0	0	0	0	0	0	0	0	0	0	WBGene00004083
C05A9.1	0	0	0	0	0	0	0	0	0	0	0	0	0	0	0	0	0	0	0	0	WBGene00003999
C05A9.2	0	0	0	0	0	0	0	1.63953	0	0	0	0	0	0	0	0	0	0	0	0	WBGene00007317
C05B10.1	0	0	0	0	0.213723	0.281129	0	0	0	0.448767	0	0	0	0.313904	0	0	0	0	0	0	WBGene00003043
C05B5.1	0	0	0	0	0	0	0	0	0	0	0	0	0	0	0	0	0	0	0	0	WBGene00007319
C05B5.11	0	0	0	0	0	0	0	0	0	0	0	0	0	0	0	0	0	0	0	0	WBGene00045242
C05B5.12	0	0	0	0	0	0	0	0	0	0	0	0	0	0	0	0	0	0	0	0	WBGene00194886
C05B5.16	0	0	0.325332	0	0	0	0	0	0	0	0	0	0	0	0	0	0	0	0	0	WBGene00219280
C05B5.17	0	0	0	0	0	0	0	0	0	0	0	0	0	0	0	0	0	0	0	0	WBGene00219314
C05B5.2	0	0	0	0	0	0	0	0	0	0	0	0	0	0	0	0	0	0	0	0	WBGene00007320
C05B5.3	0	0	0	0	0	0	0	0	0	0	2.25718	0	0	0	0	0	0	0	0.963057	0	WBGene00004100
C05B5.4	0	0	0	0	0	0	0	0	0	0.897533	0	0	0	0	0	0	0	2.93423	0.963057	2.9963	WBGene00007321
C05B5.5	0	0	0	0	0	0	0	0	0	0	0	0	0	0	0	0	0	0	0	0	WBGene00007322
C05B5.6	0	0	0	0	0	0	0	0	0	0	0	0	0	0	0	0	0	0	0	0	WBGene00007323
C05B5.7	0	0	0	0	0	0	0	0	0	0	0	0	0	0	0	0	0	0	0	0	WBGene00004344
C05B5.8	0	0	0	0	0	0	0	0	0	0.897533	0	0	0	0	0	0	0	0	0	0	WBGene00007324
C05C10.1	0	0	0	0	0	0	0	0	0	0	0	0	0	0	0	0	0	0	0	0	WBGene00007328
C05C10.2	5.43899	6.95425	5.20532	10.0374	12.3959	9.27727	13.3506	16.3953	8.48025	9.87286	3.38578	4.55166	8.0453	8.7893	7.04055	8.88784	14.2556	8.80269	6.7414	19.4759	WBGene00007329
C05C10.3	2.7195	6.95425	5.53065	8.681	7.26657	6.46598	7.62893	6.55813	2.82675	8.0778	2.25718	7.5861	6.25746	7.21979	7.88541	10.8629	8.55334	5.86846	6.7414	20.9741	WBGene00007330
C05C10.4	0	0	0	0	0	0	0	0	0	0	0	0	0	0	0	0	0.950372	0	0	0	WBGene00007331
C05C10.5	8.15849	8.69282	15.2906	30.3835	83.5656	92.7727	108.712	90.1743	118.723	101.87	5.64296	7.5861	19.6663	26.3679	69.279	78.5092	81.732	77.7571	78.9707	74.9075	WBGene00007332
C05C10.6	6.79874	19.1242	20.1706	21.9738	28.4251	21.0847	24.794	26.2325	27.3252	27.8235	13.5431	21.2411	24.1359	21.3455	25.9092	32.095	23.7593	23.4738	15.4089	37.4537	WBGene00007333
C05C10.7	5.43899	7.82354	7.80798	7.86716	7.48029	7.5905	3.81446	0	0.94225	0.448767	4.51437	4.55166	8.49227	5.96417	3.94271	1.48131	0.950372	0	0	0	WBGene00007334
C05C10.8	0	0	0	0	0	0	0	0	0	0	0	0	0	0	0	0	0	0	0	0	WBGene00086567
C05C12.1	0	0	0	0	0	0	0	0	0	0	0	0	0	0	0	0	0	0	0	0	WBGene00007335
C05C12.3	0	0	0	0	0	0	0	0	0	0	0	0	0	0	0	0	0	0	0	0	WBGene00001795
C05C12.4	0	0	0.325332	0	0	0	0	0	0	0	0	0	0	0	0	0	0	0	0	0	WBGene00007336
C05C12.5	0	0	0	0	0	0	0	0	0	0	0	0	0	0	0	0	0	0	0	0	WBGene00007337
C05C12.6	0	0	0	0	0	0.281129	1.90723	0	0	0	0	0	0	0	0	0	0.950372	0	0	1.49815	WBGene00007338
C05C8.1	5.43899	5.65033	3.90399	5.15435	8.76263	7.30937	7.62893	4.9186	5.6535	6.28273	3.38578	3.79305	7.15138	8.7893	7.60379	6.41899	9.50372	5.86846	8.66751	1.49815	WBGene00015460
C05C8.2	19.0365	21.732	15.2906	11.6651	11.1136	10.1207	9.53616	9.83719	10.3647	14.3605	16.9289	28.8272	20.1133	15.3813	12.1097	17.2819	6.6526	5.86846	10.5936	7.49075	WBGene00015461
C05C8.3	0	0	0.650665	0	0	0	0	0	0	0	0	0	0.446961	0	0	0	0	0	0	0	WBGene00001428
C05C8.4	6.79874	10.4314	11.0613	12.4789	10.6861	10.6829	1.90723	6.55813	12.2492	11.6679	6.77155	6.82749	11.174	11.9283	12.9546	8.88784	11.4045	5.86846	17.335	10.487	WBGene00001563
C05C8.5	5.43899	10.866	10.4106	23.3302	22.0134	18.8357	20.9796	19.6744	20.7295	21.092	2.25718	11.3792	18.7724	10.9866	10.9833	17.2819	10.4541	22.0067	14.4459	5.9926	WBGene00015462
C05C8.6	35.3535	41.2909	40.9919	59.4106	56.2091	50.6033	45.7736	37.7092	64.073	57.4421	24.829	46.2752	46.037	43.0048	45.9044	30.1199	50.3697	46.9477	40.4484	40.45	WBGene00015463
C05C8.7	0	0	0	0	0	0	0	0	0	0	0	0	0.893923	0	0.281622	0.493769	0	0	0	0	WBGene00015464
C05C8.8	0	0	0	0	0	0	0	0	0	0	0	0	0	0	0	0	0	0	0	0	WBGene00015465
C05C8.9	1.35975	7.38889	3.25332	8.13844	7.48029	7.5905	1.90723	9.83719	1.8845	7.18027	2.25718	3.79305	6.25746	4.08075	3.94271	4.93769	6.6526	0	5.77834	7.49075	WBGene00015466
C05C9.1	0	0	0	0	0	0	0	0	0	0	0	0	0	0	0	0	0	0	0	0	WBGene00007325
C05C9.2	0	0	0	0	0	0	0	0	0	0	0	0	0	0	0	0	0	0	0	0	WBGene00007326
C05C9.3	1.35975	0	0	0	0.213723	0	0	0	0	0	0	0	0	0.313904	0	0	0	0	0	0	WBGene00007327
C05D10.1	0	0	0	0	0	0.843388	0	6.55813	1.8845	3.59013	0	0.75861	0	0	0	0.493769	6.6526	1.46711	2.88917	7.49075	WBGene00015477
C05D10.2	0	0	0	0.271281	0	0	0	0	0	0	0	0	0	0	0	0	0	0	0	0	WBGene00015478
C05D10.3	0	0	0	0	0	0	0	0	0	0	0	0	0	0	0	0	0	0	0	0	WBGene00015479
C05D10.4	0	0	0.325332	0	0.427445	0	1.90723	0	0.94225	0.448767	0	1.51722	0	0	0.563244	1.48131	0	0	1.92611	0	WBGene00015480
C05D11.1	24.4755	31.2941	30.9066	17.6333	19.235	19.6791	9.53616	32.7906	16.0182	21.092	21.4432	30.3444	15.1967	31.3904	25.6276	14.3193	27.5608	5.86846	18.2981	16.4796	WBGene00015481
C05D11.10	4.07925	7.82354	5.53065	8.13844	4.48818	5.34146	3.81446	4.9186	2.82675	4.93643	9.02873	4.55166	5.36354	6.59198	5.63244	3.45638	0.950372	0	4.81529	0	WBGene00015487
C05D11.11	21.756	22.1667	21.4719	38.7932	54.9267	39.9204	32.4229	32.7906	65.0152	59.2372	22.5718	31.103	28.1586	46.1438	49.2838	31.6012	57.9727	51.349	58.7465	68.9149	WBGene00003214
C05D11.12	4.07925	9.5621	13.664	13.0215	18.1664	19.3979	19.0723	18.0349	19.7872	18.8482	4.51437	10.6205	12.068	11.9283	17.7422	17.7757	26.6104	10.2698	27.9287	26.9667	WBGene00002855
C05D11.13	1.35975	2.60785	0.650665	1.62769	0.213723	4.7792	3.81446	6.55813	0.94225	3.59013	0	2.27583	0.446961	1.56952	3.66108	4.93769	3.80149	4.40134	2.88917	1.49815	WBGene00015488
C05D11.2	0	3.47713	9.43464	5.96819	4.48818	4.49807	1.90723	4.9186	2.82675	2.24383	2.25718	4.55166	5.36354	5.65027	8.73028	6.41899	5.70223	10.2698	5.77834	7.49075	WBGene00006516
C05D11.3	16.317	10.4314	15.2906	14.6492	19.6625	13.4942	15.2579	13.1163	16.0182	17.9507	11.2859	4.55166	9.83315	23.5428	20.5584	14.3193	15.2059	13.204	12.5197	20.9741	WBGene00006515
C05D11.4	0	0	0	0	0	0	0	0	0	0	0	0	0	0	0	0	0	0	0	0	WBGene00002881
C05D11.5	0	0	0	0	0	0	0	0	0	0	0	0	0	0	0	0.493769	1.90074	0	0	0	WBGene00015483
C05D11.6	0	0	0	0	0.213723	0.281129	0	0	0	0	0	0	0.446961	0	0	0	0	0	0	0	WBGene00003523
C05D11.7	6.79874	6.08497	6.18131	8.40972	8.54891	10.4018	0	6.55813	13.1915	12.1167	2.25718	12.1378	5.8105	4.39465	10.7016	11.3567	10.4541	14.6711	9.63057	4.49445	WBGene00015484
C05D11.8	0	0.869282	0.325332	0.813844	0.854891	0.281129	0	0	0	0	0	1.51722	0.446961	0.941711	1.12649	0	0	0	0	0	WBGene00015485
C05D11.9	8.15849	8.69282	5.53065	6.78203	5.34307	5.34146	5.7217	4.9186	4.71125	10.7704	6.77155	7.5861	7.15138	6.27807	5.91406	5.92522	3.80149	2.93423	5.77834	1.49815	WBGene00015486
C05D12.1	0	0	0	0	0	0	0	0	0	0	0	0	0	0.313904	0	0	0	0	0	0	WBGene00007339
C05D12.2	0	0	0	0	0	0	0	0	0	0	0	0	0	0	0	0	0	0	0	0	WBGene00007340
C05D12.3	0	0	0	0	0	0	0	0	0	0	0	0	0	0	0	0	0	0	0	0	WBGene00014666
C05D12.4	0	0	0	0	0	0	0	0	0	0	0	0	0	0	0	0	0	0	0	0	WBGene00007341
C05D12.5	0	0	0	0	0	0	0	0	0	0	0	0	0	0	0	0	0	0	0	0	WBGene00007342
C05D12.7	0	0	0	0	0	0	0	0	0	0	0	0	0	0	0	0	0	0	0	0	WBGene00044029
C05D2.1	0	0	0.325332	0	0.427445	5.62259	11.4434	6.55813	13.1915	9.87286	0	0	0	0	2.25298	3.45638	5.70223	8.80269	12.5197	7.49075	WBGene00000900
C05D2.10	16.317	17.8203	21.4719	21.7025	26.2879	30.362	17.1651	26.2325	30.152	20.1945	12.4145	20.4825	25.9238	24.7984	31.5417	28.1448	20.9082	24.9409	37.5592	19.4759	WBGene00015470
C05D2.3	0	0	0	0	0	0	0	0	0	0	0	0	0	0	0	0	0	0	0	0	WBGene00015467
C05D2.4	0	0	0	0	0	0	0	0	0	0	0	0	0	0	0	0	0	0	0	0	WBGene00000239
C05D2.5	14.9572	22.1667	22.7733	30.1122	23.9369	19.1168	11.4434	26.2325	25.4407	22.4383	13.5431	21.2411	23.689	23.2289	21.4033	20.2445	9.50372	16.1383	18.2981	20.9741	WBGene00001514
C05D2.6	5.43899	4.34641	8.45864	7.59588	6.19796	11.5263	11.4434	9.83719	5.6535	12.5655	2.25718	4.55166	6.70442	4.39465	8.16704	5.92522	6.6526	5.86846	4.81529	4.49445	WBGene00015468
C05D2.8	0	0.869282	0	0	0.427445	0.562259	0	1.63953	0.94225	0	2.25718	0.75861	0.446961	0	0.281622	0.987537	0.950372	2.93423	0	0	WBGene00015469
C05D9.1	0	0	0.650665	0	0.213723	4.21694	9.53616	8.19766	8.48025	6.28273	0	0.75861	0	0	1.40811	10.8629	9.50372	8.80269	2.88917	8.9889	WBGene00004927
C05D9.2	0	0	0	0	0	0	0	0	0	0	0	0	0	0	0	0	0	0	0	0	WBGene00015471
C05D9.3	0	0	0	0	0	0	0	0	0	0	0	0	0	0	0	0	0	0	0	0	WBGene00015472
C05D9.4	0	0	0	0	0	0	0	0	0	0	0	0	0	0	0	0	0	0	0	0	WBGene00015473
C05D9.5	0	0	0	0	0	1.68678	3.81446	0	0.94225	1.3463	0	0	0	0	0.281622	4.44392	2.85111	2.93423	3.85223	5.9926	WBGene00002062
C05D9.7	0	0	0.325332	0	0	1.96791	0	0	1.8845	3.14137	0	0	0	0	0	5.43146	3.80149	4.40134	1.92611	1.49815	WBGene00015474
C05D9.9	0	0	0	0	0	0	0	0	0	0	0	0	0	0	0	0	0	0	0	0	WBGene00015476
C05E11.1	0	0	0	0.542563	0	4.7792	17.1651	0	3.769	4.48767	0	0	0	0	2.5346	7.40653	10.4541	4.40134	4.81529	5.9926	WBGene00015492
C05E11.2	0	0	0	0	0	0	0	0	0	0	0	0	0	0	0	0	0	0	0	0	WBGene00015493
C05E11.3	0	0	0	0	0	0.281129	0	0	0.94225	0.448767	0	0	0	0	0	1.48131	0	0	0	0	WBGene00015494
C05E11.4	0	0	0	0	0	0	0	0	0	0	0	0	0	0	0	0	0	0	0	0	WBGene00000133
C05E11.5	0	0	0	0	0	0	1.90723	0	0	0	0	0	0	0	0	0	0	0	0	0	WBGene00000136
C05E11.6	0	0	0	0	0	0	0	0	0	0	0	0	0	0	0	0	0	0	0	0	WBGene00015495
C05E11.7	0	0	0	0	0	0	0	0	0	0	0	0	0	0	0	0	0	0	0.963057	0	WBGene00015496
C05E11.8	0	0	0	0	0	0	0	0	0	0	0	0	0	0	0	0	0	0	0	0	WBGene00001455
C05E4.1	0	0	0	0	0	0	0	0	0	0	0	0	0	0	0	0	0.950372	0	0	1.49815	WBGene00005643
C05E4.10	0	0	0	0	0	0	0	0	0	0	0	0	0	0	0	0	0	0	0	0	WBGene00005613
C05E4.11	0	0	0	0	0	0	0	0	0	0	0	0	0	0	0	0	0	0	0	0	WBGene00005612
C05E4.12	0	0	0	0	0	0	0	0	0	0	0	0	0	0	0	0	0	0	0	0	WBGene00015491
C05E4.13	0	0	0	0	0	0	0	0	0	0	0	0	0	0	0	0	0	0	0	0	WBGene00006288
C05E4.14	0	0	0	0	0	0	0	0	0	0	0	0	0	0	0	0	0	0	0	0	WBGene00005228
C05E4.15	0	0	0	0	0	0	0	0	0	0	0	0	0	0	0	0	0	0	0	0	WBGene00206359
C05E4.2	0	0	0	0	0	0	0	0	0	0	0	0	0	0	0	0	0	0	0	0	WBGene00006087
C05E4.3	0	0	0	0	0	0	0	0	0	0	0	0	0	0	0	0	0	0	0	0	WBGene00005642
C05E4.4	0	0	0	0	0	0	0	0	0	0	0	0	0	0	0	0	0	0	0	0	WBGene00005516
C05E4.6	0	0	0	0	0	0	0	0	0	0	0	0	0	0	0	0	0	0	0	0	WBGene00006182
C05E4.7	0	0	0	0	0	0	0	0	0	0	0	0	0	0	0	0	0	0	0	0	WBGene00015489
C05E4.9	0	0	0.975997	0	0	0	0	0	0	0	0	0	0	0	0	0	0	0	0	0	WBGene00001564
C05E7.1	0	0	0	0	0	0	0	0	0	0	0	0	0	0	0	0	0	0	0	0	WBGene00007343
C05E7.2	0	0	0	0	0	0	0	0	0	0	0	0	0	0	0	0	0	0	0	0	WBGene00007344
C05E7.3	0	0	0	0	0	0	0	0	0	0	0	0	0	0	0	0	0	0	0	0	WBGene00007345
C05E7.4	0	0	0	0	0	0	0	0	0	0	0	0	0	0	0	0	0	0	0	0	WBGene00007346
C05G5.1	0	0	0	0	0	0	0	0	0	0	0	0	0	0	0	0	0	0	0	0	WBGene00007347
C05G5.2	0	0	0	0	0	0.843388	0	3.27906	0.94225	1.79507	0	0	0	0.313904	1.97135	0.987537	3.80149	1.46711	1.92611	0	WBGene00007348
C05G5.3	0	0	0	0	0	0.281129	1.90723	0	0.94225	2.6926	0	0	0	0.313904	0.281622	0	2.85111	0	1.92611	2.9963	WBGene00007349
C05G5.4	0	0.434641	0.975997	0.813844	0.427445	6.74711	1.90723	1.63953	8.48025	11.2192	0	0	0	0.941711	1.12649	9.3816	15.2059	11.7369	11.5567	11.9852	WBGene00007350
C05G5.5	0	0	0	0	0	0	0	0	0	0	0	0	0	0	0	0	0	0	0	0	WBGene00007351
C05G5.7	0	0	0	0	0	0	0	0	0	0	0	0	0	0	0	0	0	0	0	0	WBGene00050939
C05G6.1	0	0	0	0	0	0.281129	0	0	0.94225	0	0	0	0	0	0.281622	0	0.950372	0	1.92611	0	WBGene00015497
C05H8.1	0	0	0.325332	0	0	0	0	0	0	0.897533	0	0.75861	0	0	0.281622	0	0.950372	0	0	0	WBGene00000518
C06A1.1	51.6705	53.0262	90.7677	90.0654	94.038	93.0539	68.6604	111.488	99.8784	109.05	51.9152	75.861	99.2254	99.5075	90.6823	87.397	90.2853	118.836	130.976	139.328	WBGene00007352
C06A1.2	0	0	0	0	0	0	0	0	0	0	0	0	0	0	0	0	0	0	0	0	WBGene00007353
C06A1.3	0	0	0	0	0	0.281129	0	0	0	0	1.12859	0	0	0	0	0	0	0	0	0	WBGene00007354
C06A1.5	24.4755	37.3791	39.6905	27.6707	30.5623	21.0847	28.6085	18.0349	17.9027	28.7211	30.472	27.31	39.3326	32.0182	26.7541	13.3318	36.1141	17.6054	20.2242	22.4722	WBGene00007355
C06A1.6	0	0	0	0	0	0	0	0	0	0	0	0	0	0	0	0	0	0	0	0	WBGene00007356
C06A1.7	0	0	0	0	0	0	0	0	0	0	0	0	0	0	0	0	0	0	0	0	WBGene00044235
C06A12.3	0	0	0	0	0	0.281129	0	0	0	0.448767	0	0	0	0	0	0	0	1.46711	1.92611	2.9963	WBGene00007357
C06A12.4	0	0	0	0	0	0	0	0	0	0	0	0	0	0	0	0	0	0	0	0	WBGene00001550
C06A12.5	0	0	0	0	0	0	0	0	0	0	0	0	0	0	0	0	0	0	0	0	WBGene00007358
C06A12.8	0	0	0	0	0	0	0	0	0	0	0	0	0	0	0	0	0	0	0	0	WBGene00007359
C06A5.1	1.35975	1.73856	1.30133	1.08513	1.49606	0.281129	1.90723	3.27906	0	0.897533	0	0	0.893923	0.941711	1.12649	1.48131	0.950372	1.46711	0.963057	0	WBGene00015499
C06A5.10	0	0.434641	0.650665	0.271281	0.427445	0.843388	0	1.63953	0.94225	0.897533	0	0	0.446961	0.313904	1.12649	0	0.950372	0	0	0	WBGene00015506
C06A5.11	5.43899	2.60785	6.18131	8.95228	6.19796	7.87163	1.90723	4.9186	7.538	8.52656	3.38578	6.82749	6.25746	4.08075	4.78757	5.43146	2.85111	1.46711	3.85223	1.49815	WBGene00004803
C06A5.12	0	0	1.95199	2.17025	1.9235	2.53017	3.81446	0	1.8845	2.6926	0	1.51722	1.34088	1.56952	1.68973	1.48131	0.950372	1.46711	0	1.49815	WBGene00044414
C06A5.2	1.35975	0	0	0	0.213723	0	0	0	0	0	0	0	0	0	0	0.987537	0	0	0.963057	0	WBGene00015500
C06A5.3	8.15849	18.2549	12.688	18.1758	17.0978	18.2734	13.3506	18.0349	14.1337	18.8482	4.51437	14.4136	15.6436	15.3813	20.2768	16.2944	17.1067	16.1383	17.335	23.9704	WBGene00015501
C06A5.4	5.43899	4.78105	6.18131	1.35641	1.9235	0.281129	1.90723	1.63953	0.94225	0.448767	2.25718	5.31027	0	2.19733	0.844866	0.987537	0	0	0	0	WBGene00015502
C06A5.5	1.35975	1.30392	1.95199	2.44153	3.41956	1.68678	1.90723	0	0	0	1.12859	4.55166	2.23481	2.51123	2.5346	0.493769	0.950372	0	0	0	WBGene00015503
C06A5.6	31.2742	23.4706	39.6905	32.0112	37.6152	30.6431	34.3302	29.5116	29.2097	30.9649	30.472	42.4822	28.1586	31.3904	46.4676	22.7134	26.6104	45.4806	36.5962	29.963	WBGene00015504
C06A5.7	2.7195	1.30392	11.712	9.76613	9.4038	7.5905	7.62893	9.83719	12.2492	15.2581	5.64296	4.55166	10.2801	6.27807	9.57515	9.3816	12.3548	7.33557	7.70446	4.49445	WBGene00006823
C06A5.8	2.7195	0.434641	4.87998	5.96819	6.19796	5.90372	3.81446	3.27906	1.8845	3.59013	1.12859	3.79305	4.46961	3.45294	5.06919	4.93769	1.90074	13.204	3.85223	4.49445	WBGene00015505
C06A5.9	5.43899	19.5588	16.9173	16.5482	11.541	7.5905	13.3506	4.9186	15.076	8.97533	4.51437	8.34471	18.7724	11.6144	16.3341	12.838	10.4541	8.80269	6.7414	5.9926	WBGene00004380
C06A6.2	0	0	0.325332	0	0	1.12452	3.81446	0	1.8845	3.14137	0	0	0	0	0.563244	2.96261	2.85111	1.46711	1.92611	2.9963	WBGene00015507
C06A6.3	9.51824	7.82354	5.20532	10.3087	8.12146	13.7753	20.9796	11.4767	10.3647	11.6679	3.38578	9.86193	6.70442	6.90588	7.88541	6.91276	14.2556	1.46711	4.81529	2.9963	WBGene00015508
C06A6.4	13.5975	11.7353	10.736	19.261	30.7761	27.8318	5.7217	19.6744	15.076	24.6822	7.90014	12.1378	15.6436	17.5786	25.0644	20.2445	24.7097	32.2765	25.0395	16.4796	WBGene00015509
C06A6.5	0	0	0	0.271281	0	3.09242	9.53616	0	3.769	8.0778	0	0	0.446961	0.313904	0.844866	5.92522	3.80149	1.46711	5.77834	2.9963	WBGene00015510
C06A6.7	0	0	0	0	0	0	0	0	0	0	0	0	0	0	0	0	0	0	0	0	WBGene00015511
C06A8.1	35.3535	33.4673	22.7733	28.4845	22.6546	24.7394	9.53616	16.3953	29.2097	32.3112	40.6293	34.1375	33.5221	24.1706	26.4725	23.2071	23.7593	20.5396	13.4828	29.963	WBGene00015512
C06A8.2	1.35975	5.65033	4.87998	6.78203	4.7019	5.06033	3.81446	4.9186	5.6535	7.18027	1.12859	6.06888	8.0453	3.76684	6.19568	3.95015	3.80149	1.46711	0.963057	2.9963	WBGene00015513
C06A8.3	0	0.434641	0.975997	0.271281	0.213723	2.24904	0	3.27906	6.59575	3.14137	0	0	0	0	1.40811	4.44392	4.75186	2.93423	2.88917	1.49815	WBGene00015514
C06A8.4	2.7195	10.866	11.3866	10.3087	12.3959	6.46598	9.53616	9.83719	6.59575	13.0142	4.51437	4.55166	7.15138	9.10321	10.9833	7.40653	9.50372	8.80269	6.7414	20.9741	WBGene00004823
C06A8.5	10.878	25.2092	22.1226	18.9897	19.4488	19.9602	17.1651	14.7558	15.076	17.0531	15.8003	17.448	25.0298	26.6818	23.3746	13.3318	13.3052	5.86846	11.5567	5.9926	WBGene00015515
C06A8.6	0	0	0	0	0	0	0	0	0	0	0	0	0	0	0	0	0	0	0	0	WBGene00015516
C06A8.7	0	0	0	0	0	0	0	0	0	0	0	0	0	0	0	0	0	0	0	0	WBGene00005262
C06A8.8	0	0	0.325332	0	0	0	0	0	0	0	0	0	0	0	0	0.493769	0	0	0	0	WBGene00015517
C06A8.9	0	0	0	0	0	0	0	0	0	0	0	0	0	0	0	0	0	0	0	0	WBGene00001615
C06B3.1	0	0	0	0	0	0	0	0	0	0	0	0	0	0	0	0	0	0	0	0	WBGene00007360
C06B3.10	0	0	0	0	0	0	0	0	0	0	0	0	0	0	0	0	0	0	0	0	WBGene00006277
C06B3.11	0	0	0	0	0	0	0	0	0	0	0	0	0	0	0	0	0	0	0	0	WBGene00005933
C06B3.12	0	0	0	0	0	0	0	0	0	0	0	0	0	0	0	0	0	0	0	0	WBGene00044114
C06B3.13	0	0	0	0	0	0	0	0	0	0	0	0	0	0	0	0	0	0	0	0	WBGene00044115
C06B3.14	0	0	0	0	0	0	0	0	0	0	0	0	0	0	0	0	0	0	0	0	WBGene00044116
C06B3.16	0	0	0	0	0	0	0	0	0	0	0	0	0	0	0	0	0	0	0	0	WBGene00189947
C06B3.2	0	0	0	0	0	0	0	0	0	0	0	0	0	0	0	0	0	0	0	0	WBGene00007361
C06B3.3	1.35975	0	0	0	0	0	0	0	0	0	0	0	0	0	0	0	0	0	0	0	WBGene00007362
C06B3.4	0	0	0	0	0	2.53017	3.81446	3.27906	4.71125	4.0389	1.12859	0	0	0	0.844866	9.3816	2.85111	2.93423	1.92611	2.9963	WBGene00007363
C06B3.5	0	0	0	0	0	0	0	0	0	0	0	0	0	0	0	0	0	0	0	0	WBGene00007364
C06B3.6	1.35975	0	0	0	0	0.281129	3.81446	1.63953	0	0	0	0	0	0	0	0.493769	0	0	0	0	WBGene00007365
C06B3.7	0	0	0	0	0	0	0	0	0	0	0	0	0	0	0	0	0	0	0	0	WBGene00007366
C06B3.8	0	0	0	0	0	0	0	0	0	0	0	0	0	0	0	0	0	0	0	0	WBGene00001552
C06B3.9	0	0	0	0	0	0	0	0	0	0	0	0	0	0	0	0	0	0	0	0	WBGene00006278
C06B8.1	0	0	0	0	0	0	0	0	0	0	0	0	0	0	0	0	0	0	0	0	WBGene00007367
C06B8.10	0	0	0	0	0	0	0	0	0	0	0	0	0	0	0	0	0	0	0	0	WBGene00005428
C06B8.11	0	0	0	0	0	0	0	0	0	0	0	0	0	0	0	0	0	0	0	0	WBGene00007373
C06B8.2	0	0	0	0	0	0	0	0	0	0	0	0	0	0	0	0	0	0	0	0	WBGene00007368
C06B8.3	0	0	0	0	0	0	0	0	0	0	0	0	0	0	0	0	0	0	0	0	WBGene00007369
C06B8.4	0	0	0	0	0	0	0	0	0	0	0	0	0	0	0	0	0	0	0	0	WBGene00007370
C06B8.6	0	0	0	0	0	0	0	0	0	0	0	0	0	0	0	0	0	0	0	0	WBGene00005429
C06B8.7	0	0	0	0	0	0	0	0	0	0.448767	0	0	0	0	0	0	0	0	0	1.49815	WBGene00007372
C06B8.8	352.175	272.954	247.903	181.487	158.796	161.368	179.28	62.3022	37.69	16.1556	336.32	242.755	261.919	244.845	127.856	99.7413	47.5186	4.40134	7.70446	4.49445	WBGene00004452
C06B8.9	0	0	0	0	0	0	0	0	0	0	0	0	0	0	0	0	0	0	0	0	WBGene00005768
C06C3.1	6.79874	9.5621	10.0853	11.1225	12.3959	17.1489	17.1651	19.6744	11.307	16.6044	6.77155	13.655	13.8558	16.6369	13.2362	22.7134	18.0571	13.204	15.4089	20.9741	WBGene00003196
C06C3.10	0	0	0	0	0	0	0	0	0	0	0	0	0	0	0.281622	0	0	0	0	0	WBGene00044169
C06C3.12	0	0	0	0	0	0	0	0	0	0	0	0	0	0	0	0	0	0	0	0	WBGene00175031
C06C3.3	0	0	0	0	0	0	0	0	0	0	0	0	0	0	0	0	0	0	0	0	WBGene00007374
C06C3.4	0	0	0	0	0	0	0	0	0	0	0	0	0	0	0	0	0	0	0	0	WBGene00007375
C06C3.6	0	0	0	0	0	0	0	0	1.8845	0	0	0	0	0	0	0	0	0	0	0	WBGene00005271
C06C3.7	0	0	0	0	0	0	0	0	0	0	0	0	0	0	0	0	0	0	0	0	WBGene00007377
C06C3.8	0	0	0	0	0	0	0	0	0	0	0	0	0	0	0.281622	0	0	0	0	0	WBGene00007378
C06C3.9	0	0	0	0	0	0	0	0	0	0	0	0	0	0	0	0	0	0	0	0	WBGene00014668
C06C6.1	0	0	0	0	0	0	0	0	0	0	0	0	0	0	0	0	0	0	0	0	WBGene00007379
C06C6.2	0	0	0	0	0	0	0	0	0	0	0	0	0	0	0	0	0	0	0	0	WBGene00006264
C06C6.3	0	0	0	0	0	0	0	0	0	0	0	0	0	0	0	0	0	0	0	0	WBGene00006262
C06C6.4	0	0	0	0	0	0	0	0	0	0	0	0	0	0	0	0	0	0	0	0	WBGene00003653
C06C6.5	0	0	0	0	0	0	0	0	0	0	0	0	0	0	0	0	0	0	0	0	WBGene00003640
C06C6.6	0	0	0	0	0	0	0	0	0	0	0	0	0	0	0	0	0	0	0	0	WBGene00007380
C06C6.7	0	0	0	0	0	0	0	0	0	0	0	0	0	0	0	0	0	0	0	0	WBGene00007381
C06C6.8	0	0	0	0	0	0	0	0	0	0	0	0	0	0	0	0	0	0	0	0	WBGene00007382
C06C6.9	0	0	0	0	0	0	0	0	0	0	0	0	0	0	0	0	0	0	0	0	WBGene00007383
C06E1.1	0	0	0	0.271281	0	0	0	0	0.94225	1.79507	0	0	0	0	0	0.987537	0	1.46711	0.963057	2.9963	WBGene00015518
C06E1.10	2.7195	11.3007	5.85598	5.15435	3.41956	5.34146	3.81446	6.55813	2.82675	4.48767	3.38578	2.27583	4.46961	7.21979	3.37946	4.93769	5.70223	1.46711	9.63057	5.9926	WBGene00015525
C06E1.11	1.35975	1.30392	0.650665	0.542563	0.427445	0	0	0	0.94225	0	0	0	0	0.627807	0.281622	0	0	0	0	0	WBGene00015526
C06E1.3	0	0	0	0	0	0	0	0	0	0	0	0	0	0	0	0	0	0	0	0	WBGene00015519
C06E1.4	0	0	0	0	0	0	0	0	0	0	0	0	0	0	0	0	0	0	0	0	WBGene00001612
C06E1.5	0	0	0	0	0	0	0	0	0	0	0	0	0	0	0	0	0	0	0	0	WBGene00015520
C06E1.6	0	0	0	0	0	0	0	0	0	0	0	0	0	0	0	0	0	0	0	2.9963	WBGene00015521
C06E1.7	0	0	0	0	0	0	0	0	0	0	0	0	0	0	0	0	0	0	0	0	WBGene00015522
C06E1.8	0	0	0	0	0	0	0	0	0	0	0	0	0	0	0	0	0	0	0	0	WBGene00015523
C06E1.9	10.878	11.3007	9.75997	17.9046	10.8999	11.2452	11.4434	6.55813	3.769	11.6679	3.38578	15.1722	13.8558	9.73102	13.2362	13.8255	10.4541	17.6054	11.5567	13.4833	WBGene00015524
C06E2.1	0	0	0	0	0.213723	0	0	0	0	0	0	0	0	0	0	0	0	0	0	0	WBGene00015527
C06E2.2	0	0	0	0	0	0	0	0	0	0	0	0	0	0	0	0	0	0	0	0	WBGene00015528
C06E2.3	0	0	0	0	0	0	0	0	0	0	0	0	0	0	0	0	0	0	0	0	WBGene00006716
C06E2.5	0	0	0	0	0	2.24904	3.81446	1.63953	4.71125	5.3852	0	0	0	0	0.281622	4.44392	1.90074	1.46711	0	2.9963	WBGene00015529
C06E2.7	0	0	0	0	0	0	0	0	0	0	0	0	0	0	0	0	0	0	0	0	WBGene00006717
C06E2.8	0	0	0	0	0	0	0	0	0	0	0	0	0	0	0	0	0	0	0	0	WBGene00002092
C06E2.9	0	0	0	0	0	0	0	0	0	0	0	0	0	0	0	0	0	0	0	0	WBGene00044579
C06E4.1	0	0	0	0	0	0	0	0	0	0	0	0	0	0	0	0	0	0	0	0	WBGene00015530
C06E4.2	0	0	0	0	0	0	1.90723	0	0	0.448767	0	0	0	0	0	0.493769	0	0	0	1.49815	WBGene00015531
C06E4.3	0	0	0	0	0	0	0	0	0	0	0	0	0	0	0	0	0	0	0	0	WBGene00015532
C06E4.4	0	0	0	0	0	0	0	0	0	0	0	0	0	0	0	0	0	0	0	0	WBGene00015533
C06E4.5	0	0	0	0	0	0	0	0	0	0	0	0	0	0	0	0	0	0	0	0	WBGene00015534
C06E4.6	0	0	0	0	0	0	0	0	0	0	0	0	0	0	0	0	0	0	0	0	WBGene00015535
C06E4.7	0	0	0	0	0	0	0	0	0	0	0	0	0	0	0	0	0	0	0	0	WBGene00015536
C06E4.8	0	0	0	0	0	0	0	0	0	0	0	0	0	0	0	0	0	0	0	0	WBGene00015537
C06E7.1	97.9019	79.5393	84.5864	87.0813	70.9559	51.1656	55.3097	63.9418	73.4955	64.1736	103.83	104.688	70.1729	58.3861	54.6347	51.8457	43.7171	58.6846	32.7439	34.4574	WBGene00015538
C06E7.2	0	0	0	0	0	0	0	0	0	0	0	0	0	0	0	0	0	0	0	0	WBGene00015539
C06E7.3	72.0667	49.9837	50.7518	67.0065	66.6815	70.0012	97.2688	85.2557	111.185	81.6755	39.5007	42.4822	42.4613	44.8882	44.4963	39.0077	79.8312	117.369	90.5274	49.4389	WBGene00015540
C06E7.4	0	0.434641	0	0	0.213723	0.843388	0	0	0	1.3463	0	0	0.446961	0	0.281622	1.97507	0.950372	0	0	0	WBGene00015541
C06E7.6	0	0	0	0	0	0	0	0	0	0	0	0	0	0	0	0	0	0	0	0	WBGene00004973
C06E7.7	0	0	0	0	0	0	0	0	0	0	0	0	0	0	0	0	0	0	0	0	WBGene00005728
C06E7.88	0	0	0	0	0	0	0	0	0	0	0	0	0	0	0	0	0	0	0	0	WBGene00189995
C06E8.3	0	0	0	0	0.427445	3.09242	5.7217	0	0	2.24383	0	0	0	0	1.68973	2.46884	2.85111	1.46711	0	1.49815	WBGene00004182
C06E8.5	0	0	0	0	0	0	0	0	0	0	0	0	0	0	0	0	0	0	0	0	WBGene00015544
C06G1.1	0	0	0	0	0	0	0	0	0	0	0	0	0	0	0	0	0	0	0	0	WBGene00015545
C06G1.2	0	0	0.325332	0	0	0	0	0	0	0	0	0	0	0	0	0	0	0	0	0	WBGene00015546
C06G1.4	0	0	0.650665	0.542563	0.427445	4.7792	9.53616	11.4767	6.59575	8.0778	0	0	0	0.313904	2.5346	10.3691	7.60297	8.80269	10.5936	14.9815	WBGene00015547
C06G1.5	0	0	0.650665	0	0	0.281129	0	1.63953	0	0	0	0	0	0	0	0	1.90074	0	0	4.49445	WBGene00015548
C06G1.6	0	0	0	0	0	0	0	0	0	0	0	0	0	0	0	0	0	0	0	0	WBGene00077591
C06G3.1	0	0	0	0	0	0	0	1.63953	0	0.448767	0	0	0	0	0	0	0	0	0	0	WBGene00003695
C06G3.10	1.35975	6.08497	4.87998	8.40972	10.045	11.8074	9.53616	4.9186	4.71125	8.97533	3.38578	12.8964	8.93923	5.65027	11.8281	6.41899	2.85111	4.40134	9.63057	5.9926	WBGene00000585
C06G3.11	6.79874	14.3431	16.5919	9.22357	7.26657	5.62259	1.90723	6.55813	0.94225	4.48767	13.5431	9.86193	7.15138	8.7893	4.78757	4.44392	4.75186	1.46711	1.92611	0	WBGene00006572
C06G3.2	2.7195	4.78105	13.664	10.3087	11.3273	5.34146	7.62893	8.19766	4.71125	5.3852	13.5431	10.6205	13.8558	8.7893	10.9833	7.40653	6.6526	5.86846	5.77834	8.9889	WBGene00002228
C06G3.3	0	0	0	0	0	0	0	1.63953	0	0	0	0	0	0	0	0	0	0	0	0	WBGene00015549
C06G3.4	1.35975	0	0	0	0	0	0	0	0	0	0	0	0	0	0	0	0	0	0	0	WBGene00015550
C06G3.5	0	0	0	0.271281	0.213723	0.843388	1.90723	6.55813	1.8845	0.897533	0	0	0	0.627807	0.281622	1.97507	0.950372	7.33557	4.81529	0	WBGene00015551
C06G3.6	0	1.30392	0.975997	0.271281	0.213723	3.65468	3.81446	3.27906	2.82675	5.3852	0	2.27583	0	0	1.12649	4.44392	1.90074	4.40134	2.88917	7.49075	WBGene00015552
C06G3.7	13.5975	9.12746	12.3626	7.3246	8.54891	7.30937	3.81446	9.83719	7.538	5.3852	9.02873	8.34471	10.7271	7.84759	6.75893	7.40653	5.70223	8.80269	4.81529	1.49815	WBGene00015553
C06G3.8	1.35975	6.08497	5.20532	5.42563	5.55679	3.37355	1.90723	4.9186	5.6535	8.0778	6.77155	6.06888	6.70442	5.33636	3.66108	7.9003	7.60297	13.204	1.92611	2.9963	WBGene00015554
C06G3.9	5.43899	7.82354	10.0853	20.0748	16.0292	19.1168	17.1651	9.83719	16.9605	17.0531	12.4145	22.7583	12.9619	12.8701	19.9952	15.3068	16.1563	13.204	10.5936	17.9778	WBGene00015555
C06G4.1	4.07925	4.78105	4.22932	6.78203	7.05285	5.34146	5.7217	6.55813	9.4225	7.18027	6.77155	6.82749	7.15138	5.33636	8.44866	5.92522	4.75186	8.80269	2.88917	5.9926	WBGene00015557
C06G4.2	13.5975	9.99674	14.64	18.4471	21.586	15.4621	7.62893	8.19766	19.7872	16.6044	9.02873	18.2066	12.068	12.8701	18.3054	13.8255	22.8089	26.4081	18.2981	11.9852	WBGene00000542
C06G4.4	0	0	0.325332	0	0	0	0	0	0	0	0	0	0	0	0	0	0	0	0	0	WBGene00015558
C06G4.5	0	0	0	0	0	0	0	0	0	0.897533	0	0	0	0	0	0	0	0	0	0	WBGene00015559
C06G4.6	0	0	0	0	0	0	0	0	0	0	0	0	0	0	0	0	0	0	0	0	WBGene00044446
C06G8.1	0	0	0.325332	0	0	0	0	0	0	0	0	0	0	0.313904	0	0	0	0	0	0	WBGene00007384
C06G8.2	0	0	0	0	0	0	0	0	0	0	0	0	0	0	0	0	0	0	0	0	WBGene00003876
C06G8.3	0	0	0	0	0	0	0	0	0	0	0	0	0	0	0	0	0	0	0	0	WBGene00014669
C06G8.4	0	0	0	0	0	0	0	0	0	0	0	0	0	0	0	0	0	0	0	0	WBGene00005085
C06H2.1	54.3899	80.8432	67.3438	63.2086	47.019	47.2298	26.7013	63.9418	54.6505	49.3643	59.8154	65.9991	57.658	78.4759	54.0714	32.5887	57.9727	35.2108	75.1185	74.9075	WBGene00007385
C06H2.2	0	6.51961	6.18131	5.42563	4.27445	3.65468	7.62893	1.63953	5.6535	3.14137	3.38578	3.03444	4.46961	5.33636	6.19568	6.41899	2.85111	7.33557	0.963057	1.49815	WBGene00007386
C06H2.3	4.07925	1.30392	5.20532	4.61178	4.91562	4.49807	5.7217	0	7.538	4.48767	4.51437	2.27583	5.36354	2.19733	4.78757	2.96261	1.90074	1.46711	2.88917	4.49445	WBGene00007387
C06H2.4	0	0	0.325332	0	0.213723	0.843388	0	3.27906	0	0	0	0	0	0.313904	0	0.493769	1.90074	0	0.963057	1.49815	WBGene00007388
C06H2.5	0	0	0	0	0	0	0	0	0	0	0	0	0	0	0	0	0	0	0	0	WBGene00007389
C06H2.6	10.878	14.7778	37.4132	40.6922	35.9054	30.6431	41.9591	32.7906	43.3435	45.3254	27.0862	12.8964	25.0298	23.8567	28.1622	24.1947	36.1141	24.9409	27.9287	47.9408	WBGene00007390
C06H2.7	0	0	0	0.271281	3.63329	16.5866	17.1651	13.1163	13.1915	16.1556	0	0	0	0.313904	6.19568	16.7881	17.1067	8.80269	7.70446	8.9889	WBGene00007391
C06H5.1	0	0	0	0	0	0	0	0	0	0	0	0	0	0	0	0	0	0	0	0	WBGene00007392
C06H5.11	0	0	0	0	0	0	0	0	0	0	0	0	0	0	0	0	0	0	0	0	WBGene00206499
C06H5.2	0	0	0	0	0	0	0	0	0	0	0	0	0	0	0	0	0	0	0	0	WBGene00007393
C06H5.6	0	0	0	0	0	0.281129	0	0	0	0	0	0	0	0	0	0.493769	0	0	0	0	WBGene00007394
C06H5.7	0	0.434641	0	0.271281	0	0.281129	0	0	0	0	0	0	0	0.313904	0	0	0	0	0	0	WBGene00007395
C06H5.8	0	0	0	0	0	0.843388	0	0	0	0.448767	0	0	0	0	0.563244	0	0	0	0	0	WBGene00044795
C07A12.1	0	0	0	0	0	0	0	0	0	0	0	0	0	0	0	0	0	0	0	0	WBGene00001821
C07A12.18	0	0	0	0	0	0	0	0	0	0	0	0	0	0	0	0	0	0	0	0	WBGene00206364
C07A12.2	0	0	0	0	0	0	0	0	0	0	0	0	0	0	0	0	0	0	0	0	WBGene00015560
C07A12.3	0	0	0	0.271281	0	0	1.90723	1.63953	1.8845	2.24383	0	0	0	0	0	2.46884	2.85111	0	1.92611	2.9963	WBGene00003628
C07A12.4	1.35975	2.1732	6.18131	5.15435	6.41168	43.5751	68.6604	78.6976	62.1885	52.5057	0	1.51722	0.893923	7.21979	14.0811	52.3395	96.9379	79.2242	92.4535	53.9334	WBGene00003963
C07A12.5	0	0	0	0.271281	0	4.21694	1.90723	0	5.6535	7.62903	0	0	0	0	0	6.91276	1.90074	2.93423	9.63057	5.9926	WBGene00005008
C07A12.7	0	0	0	0	0	1.96791	3.81446	0	2.82675	1.3463	0	0	0	0	0.281622	3.45638	1.90074	2.93423	1.92611	2.9963	WBGene00015561
C07A4.1	0	0	0	0	0	0	0	0	0	0	0	0	0	0	0	0	0	0	0	0	WBGene00007396
C07A4.2	0	0	0	0	0	0	0	0	0	0	0	0	0	0	0	0	0	0	0	0	WBGene00007397
C07A4.3	0	0	0	0	0	0	0	0	0	0	0	0	0	0	0	0	0	0	0	0	WBGene00007398
C07A9.1	0	0	0	0	0	0	0	0	0	0	0	0	0	0	0	0	0	0	0	0	WBGene00007399
C07A9.10	0	0	0	0	0	0	0	0	0	0	0	0	0	0	0	0	0	0	0	0	WBGene00007406
C07A9.11	0	0	0.325332	0	0.213723	0	0	0	0.94225	0	0	0	0	0	0.281622	0	0	0	0	0	WBGene00003572
C07A9.12	0	0	0	0	0	0	0	0	0	0	0	0	0	0	0	0	0	0	0	0	WBGene00043994
C07A9.13	0	0	0	0	0	0	0	0	0	0	0	0	0	0	0	0	0	0	0	0	WBGene00044227
C07A9.2	5.43899	10.866	13.664	20.8887	12.8234	12.0886	17.1651	19.6744	18.845	17.0531	5.64296	17.448	15.1967	9.73102	10.42	11.8504	19.0074	5.86846	15.4089	13.4833	WBGene00007400
C07A9.3	2.7195	6.08497	4.22932	10.58	9.83124	11.2452	7.62893	9.83719	4.71125	12.5655	9.02873	5.31027	4.46961	6.27807	12.3914	11.8504	15.2059	17.6054	10.5936	10.487	WBGene00006579
C07A9.4	0	0	0	0	0	0	0	0	0	0	0	0	0	0	0	0	0	0	0	0	WBGene00003571
C07A9.5	0	0	0	0	0	0	0	0	0	0	0	0	0	0	0	0	0	0	0	0	WBGene00007401
C07A9.6	0	0	0	0	0	0	0	0	0	0	0	0	0	0.627807	0	0	0	0	0	0	WBGene00007402
C07A9.7	5.43899	6.08497	7.15731	9.76613	6.41168	8.43388	13.3506	0	3.769	2.6926	1.12859	4.55166	8.93923	7.84759	10.9833	6.41899	8.55334	7.33557	0.963057	7.49075	WBGene00007403
C07A9.8	0	0	0	0	0	0	0	0	0	0	0	0	0	0	0	0	0	0	0	0	WBGene00007404
C07A9.9	0	0	0	0	0	5.90372	3.81446	3.27906	1.8845	2.6926	2.25718	0	0	0	1.40811	2.46884	0.950372	4.40134	0	0	WBGene00007405
C07B5.2	0	0	0	0	0	0	0	0	0	0	0	0	0	0	0	0	0	0	0	0	WBGene00007407
C07B5.3	0	0	0	0	0	0	0	0	0	0	0	0	0	0	0	0	0	0	0	0	WBGene00007408
C07B5.4	0	0	0	0	0	0	0	0	0	0	0	0	0	0	0	0	0	0	0	0	WBGene00007409
C07B5.5	0	0	0.650665	0	0	0	0	0	0	0	0	0	0	0.627807	0	0	0	0	0	0	WBGene00003828
C07B5.6	0	0	0	0	0	0	0	0	0	0	0	0	0	0	0	0	0	0	0	0	WBGene00007410
C07B5.8	0	0	0	0	0	0	0	0	0	0	0	0	0	0	0	0	0	0	0	0	WBGene00195209
C07C7.1	0	0	0	0	0	0	0	0	0	0	0	0	0	0	0	0	0	0	0	0	WBGene00007411
C07D10.1	0	0	0	0	0	0	0	0	0	0	0	0	0	0	0	0	0.950372	0	0	0	WBGene00015566
C07D10.2	8.15849	13.0392	12.3626	17.0907	19.4488	22.2092	13.3506	13.1163	29.2097	19.297	9.02873	12.8964	15.1967	12.8701	18.587	18.7632	18.0571	23.4738	20.2242	26.9667	WBGene00015567
C07D10.3	0	0	0	0	0	0	0	0	0	0	0	0	0	0	0	0	0	0	0	0	WBGene00015568
C07D10.4	0	0	0	0	0	0	0	0	0	0	0	0	0	0	0	0	0	0	0	0	WBGene00003526
C07D10.5	0	0.434641	0.975997	0.542563	0	1.40565	1.90723	6.55813	0.94225	7.18027	0	0	0.446961	0	0.844866	2.96261	1.90074	2.93423	3.85223	0	WBGene00015569
C07D10.6	0	0	0	0	0	0	0	0	0	0	0	0	0	0	0	0	0	0	0	0	WBGene00044673
C07D8.5	0	0	0	0	0	0	0	0	0	0	0	0	0	0	0	0	0	0	0	0	WBGene00015564
C07D8.6	0	3.04249	1.95199	2.44153	3.20584	96.1463	83.9182	134.442	101.763	113.987	2.25718	2.27583	0.446961	1.56952	37.4557	98.26	115.945	108.566	154.089	170.789	WBGene00015565
C07E3.1	1.35975	5.21569	3.90399	14.9205	7.90774	10.964	7.62893	0	6.59575	5.83397	16.9289	8.34471	7.15138	3.45294	15.4892	8.88784	3.80149	7.33557	11.5567	7.49075	WBGene00007412
C07E3.10	0	0	0	0	0	0	0	0	0	0	0	0	0	0	0	0	0	0	0	0	WBGene00007420
C07E3.2	6.79874	17.8203	14.3146	13.5641	8.12146	7.5905	7.62893	6.55813	2.82675	11.2192	19.1861	15.1722	9.83315	15.6952	10.9833	7.40653	11.4045	10.2698	9.63057	7.49075	WBGene00007413
C07E3.3	0	0	0	0	0	0	0	0	0	0	0	0	0	0	0	0	0	0	0	0	WBGene00007414
C07E3.4	0	0	0	0	0	0	0	0	0	0	0	0	0	0	0	0	0	0	0	0	WBGene00007415
C07E3.5	0	0	0	0	0	0	0	0	0	0	0	0	0	0	0	0	0	0	0	0	WBGene00007416
C07E3.6	0	0	0	0	1.49606	8.99614	1.90723	0	4.71125	5.3852	0	0	0	0	3.94271	1.97507	1.90074	5.86846	0	0	WBGene00007417
C07E3.8	0	0	0	0	0	0	0	0	0	0	0	0	0	0	0	0	0	0	0	0	WBGene00007418
C07E3.9	0	0.434641	0.325332	0	0.213723	0.562259	1.90723	3.27906	9.4225	2.6926	0	0	0	0.313904	0	0.987537	3.80149	7.33557	14.4459	8.9889	WBGene00007419
C07F11.1	1.35975	5.21569	12.3626	9.76613	13.4645	11.2452	17.1651	14.7558	10.3647	20.1945	3.38578	5.31027	10.2801	10.6727	9.85677	15.8006	29.4615	20.5396	11.5567	17.9778	WBGene00006593
C07F11.2	0	0	0	0	0	0	0	0	0	0	0	0	0	0	0	0	0	0	0	0	WBGene00015570
C07G1.1	0	0	0	0	0	0	0	0	0	0	0	0	0	0	0	0	0	0	0.963057	0	WBGene00006620
C07G1.2	0	0	0	0	0	0	0	0	0	0	0	0	0	0	0	0	0	0	0	0	WBGene00015571
C07G1.3	16.317	29.1209	31.5572	32.2825	30.9898	31.7676	47.6808	36.0697	30.152	34.555	15.8003	34.8961	25.9238	19.462	32.6681	36.0451	33.263	36.6779	33.707	40.45	WBGene00003961
C07G1.4	24.4755	20.4281	23.7493	33.9102	30.3486	25.8639	15.2579	24.593	29.2097	34.1063	14.6717	26.5514	27.2646	23.5428	30.4152	22.2196	18.0571	36.6779	23.1134	44.9445	WBGene00006957
C07G1.5	4.07925	5.65033	6.50665	8.95228	5.55679	5.34146	3.81446	6.55813	9.4225	5.83397	4.51437	2.27583	6.70442	5.65027	9.85677	11.8504	12.3548	13.204	5.77834	8.9889	WBGene00004101
C07G1.6	0	0	0	0	0	0	0	0	0	0	0	0	0	0	0	0	0	0	0	0	WBGene00015572
C07G1.7	0	0	0	0	0	0	0	0	0	0	0	0	0	0	0	0	0	0	0	0	WBGene00015573
C07G1.8	13.5975	8.25818	8.45864	7.3246	5.77051	7.87163	5.7217	8.19766	13.1915	7.18027	5.64296	11.3792	10.2801	9.10321	7.32217	8.39407	8.55334	8.80269	10.5936	4.49445	WBGene00044608
C07G2.1	29.9145	19.5588	63.7651	175.519	194.06	229.121	492.066	395.127	466.414	315.932	28.2148	70.5508	172.974	177.983	224.171	275.523	462.831	696.879	537.386	414.987	WBGene00000465
C07G2.2	17.6767	18.2549	23.4239	18.1758	18.8076	18.8357	7.62893	27.8721	24.4985	21.092	6.77155	22.7583	17.4315	16.323	25.346	16.7881	18.0571	14.6711	24.0764	19.4759	WBGene00000223
C07G2.3	73.4264	78.67	76.7784	62.1234	68.1775	58.1938	61.0314	59.0232	61.2462	68.6613	80.13	48.5511	52.7414	78.7898	63.0833	51.3519	51.3201	58.6846	68.3771	62.9223	WBGene00000380
C07G3.10	0	0	0.325332	0	0	0.281129	0	0	0	0	0	0	0	0.627807	0	0	0	0	0.963057	0	WBGene00015578
C07G3.2	0	0	0	0	0	0	0	0	0	0.448767	0	0	0	0	0	0.493769	0	0	0	0	WBGene00015574
C07G3.3	0	0	0	0	0	0	0	0	0	0	0	0	0	0	0	0	0	0	0	0	WBGene00006258
C07G3.4	0	0	0	0	0	0	0	0	0	0	0	0	0	0	0	0	0	0	0	0	WBGene00006257
C07G3.5	0	0	0	0	0	0	0	0	0	0	0	0	0	0	0	0	0	0	0	0	WBGene00006259
C07G3.6	0	0	0	0	0	0	0	0	0	0	0	0	0	0	0	0	0	0	0	0	WBGene00006256
C07G3.8	0	0	0	0	0.641168	0.281129	0	0	0	0	0	0.75861	0	0	0	0	0	0	0	0	WBGene00015576
C07G3.9	5.43899	5.21569	5.85598	6.23947	5.55679	6.18485	3.81446	0	7.538	5.83397	3.38578	4.55166	3.57569	2.82513	5.35082	5.43146	10.4541	7.33557	5.77834	1.49815	WBGene00015577
C07H4.1	0	0	0	0	0	0	0	0	0	0	0	0	0	0	0	0	0	1.46711	0	2.9963	WBGene00007421
C07H4.2	14.9572	12.1699	20.4959	24.144	22.8683	21.647	19.0723	24.593	19.7872	18.8482	11.2859	25.7927	18.7724	18.5203	25.0644	21.2321	30.4119	45.4806	43.3376	22.4722	WBGene00000532
C07H6.1	2.7195	1.30392	1.62666	4.06922	5.98424	2.81129	7.62893	3.27906	4.71125	2.6926	2.25718	0.75861	4.02265	5.02246	8.73028	3.45638	3.80149	7.33557	1.92611	0	WBGene00002986
C07H6.2	8.15849	9.5621	16.2666	15.7343	15.388	12.932	19.0723	9.83719	11.307	12.5655	6.77155	6.06888	9.83315	15.3813	12.1097	7.40653	7.60297	10.2698	18.2981	5.9926	WBGene00015579
C07H6.3	0	0.434641	0	0	0	0.281129	0	1.63953	0	0	0	0	0	0	0	0	0	0	0	0	WBGene00015580
C07H6.4	8.15849	13.9085	12.688	18.4471	9.19008	10.4018	22.8868	13.1163	12.2492	7.62903	11.2859	21.2411	13.8558	10.9866	18.3054	13.8255	5.70223	10.2698	17.335	11.9852	WBGene00015581
C07H6.5	10.878	12.6046	15.616	16.8194	13.6783	9.5584	5.7217	19.6744	6.59575	8.97533	3.38578	12.1378	6.70442	12.8701	8.73028	5.43146	4.75186	5.86846	5.77834	8.9889	WBGene00000479
C07H6.6	17.6767	25.6438	20.8213	35.2666	26.9291	22.2092	20.9796	31.1511	23.5562	28.7211	9.02873	13.655	26.8177	29.8209	34.3579	30.1199	33.263	36.6779	33.707	23.9704	WBGene00000537
C07H6.7	0	0	0.650665	0	0	1.40565	0	1.63953	1.8845	1.3463	0	0	0	0.313904	0.563244	0.493769	0	0	0.963057	0	WBGene00003024
C07H6.8	6.79874	3.47713	4.22932	7.3246	5.55679	3.09242	1.90723	4.9186	2.82675	4.0389	4.51437	9.86193	7.59834	4.39465	5.06919	8.88784	2.85111	2.93423	7.70446	0	WBGene00000854
C07H6.9	0	0	0.325332	0.271281	0	0	0	0	0	0	0	0	0	0	0.563244	0	0	0	0	0	WBGene00015582
C08A9.1	0	0	0	0	0	0	0	0	0	0	0	0	0	0	0	0	0	0	0	0	WBGene00004932
C08A9.10	0	0	0	0	0	0	0	0	0	0	0	0	0	0	0	0	0	0	0	0	WBGene00044773
C08A9.3	0	0	0	0	0	0	0	0	0	0	0	0	0	0	0	0	0	0	0	0	WBGene00015583
C08A9.6	0	0	0	0	0	1.12452	1.90723	1.63953	0.94225	2.24383	0	0	0	0	0	2.46884	3.80149	0	0.963057	0	WBGene00015586
C08A9.7	0	0	0	0	0	0	0	0	0	0	0	0	0	0	0	0	0	0	0	0	WBGene00015587
C08A9.8	0	0	0	0	0	0.562259	0	0	0	0	0	0	0	0	0.281622	0	0.950372	0	0	0	WBGene00015588
C08A9.9	0	0	0	0	0	0.843388	0	0	0	0	0	0	0	0	0.281622	0.493769	0	0	0	0	WBGene00015589
C08B11.1	1.35975	8.25818	19.8453	27.3994	39.7524	41.0449	62.9387	57.3836	38.6322	50.2619	4.51437	11.3792	13.4088	20.0898	41.68	46.4143	69.3771	80.6913	48.1529	67.4167	WBGene00006996
C08B11.2	8.15849	6.51961	5.85598	13.5641	13.6783	9.27727	9.53616	4.9186	9.4225	11.6679	6.77155	8.34471	16.0906	9.41711	12.9546	15.8006	12.3548	16.1383	11.5567	11.9852	WBGene00001835
C08B11.3	13.5975	19.1242	24.0746	32.2825	30.9898	33.7355	24.794	49.186	47.1125	37.6964	12.4145	21.2411	29.4994	26.054	38.019	44.9329	43.7171	68.9544	37.5592	40.45	WBGene00007433
C08B11.4	0	0	0	0	0	0	0	0	0	0.448767	0	0	0	0	0	0	0	0	0	1.49815	WBGene00003813
C08B11.5	6.79874	9.5621	12.3626	13.5641	9.19008	8.15275	7.62893	9.83719	6.59575	8.0778	14.6717	10.6205	7.59834	10.9866	10.1384	13.8255	10.4541	13.204	8.66751	11.9852	WBGene00004723
C08B11.6	2.7195	7.38889	5.20532	7.3246	7.69402	8.43388	11.4434	3.27906	5.6535	8.0778	3.38578	3.79305	6.25746	9.10321	6.75893	6.91276	6.6526	4.40134	6.7414	7.49075	WBGene00007434
C08B11.7	12.2377	18.2549	17.8933	21.1599	20.7311	19.6791	9.53616	9.83719	28.2675	21.5408	19.1861	25.7927	20.5602	22.915	24.5011	7.9003	11.4045	10.2698	16.372	11.9852	WBGene00006724
C08B11.8	4.07925	5.21569	5.53065	7.86716	6.41168	8.71501	1.90723	3.27906	12.2492	8.0778	3.38578	6.06888	6.25746	3.45294	3.94271	6.41899	4.75186	4.40134	5.77834	5.9926	WBGene00007435
C08B11.9	13.5975	13.9085	10.4106	15.7343	19.0213	17.43	7.62893	14.7558	6.59575	13.0142	15.8003	12.1378	11.621	20.0898	20.84	14.8131	20.9082	19.0725	9.63057	7.49075	WBGene00007436
C08B6.1	0	0	0	0	0	0	0	0	0	0	0	0	0	0	0	0	0	0	0	0	WBGene00007422
C08B6.10	0	0	0	0	0	0	0	0	0	0	0	0	0	0	0.281622	0	0	0	0	0	WBGene00007430
C08B6.11	0	0	0	0	0	0	0	0	0	0	0	0	0	0	0	0	0	0	0	0	WBGene00007431
C08B6.12	0	0	0	0	0	0	0	0	0	0	0	0	0	0	0	0	0	0	0	0	WBGene00007432
C08B6.13	0	0	0	0	0	0	0	0	0	0	0	0	0	0	0	0	0	0	0	0	WBGene00044012
C08B6.14	0	0	0	0	0	0	0	0	0	0	0	0	0	0	0	0	0	0	0	0	WBGene00044044
C08B6.2	0	0	0	0	0	0	0	0	0	0	0	0	0	0	0	0	0	0	0	0	WBGene00007423
C08B6.3	0	0	0	0	0	0	0	0	0	0	0	0	0	0	0	0	0	0	0	0	WBGene00007424
C08B6.4	0	0	0	0	0	0.281129	0	0	0	0	0	0	0	0	0	0	0	0	0	0	WBGene00007425
C08B6.5	0	0	0	0	0	0	0	0	0	0	0	0	0	0	0	0	0	0	0	0	WBGene00007426
C08B6.6	0	0	0	0	0	0	0	0	0	0	0	0	0	0	0	0	0	0	0	0	WBGene00007427
C08B6.7	20.3962	28.2517	35.1359	32.825	45.7367	44.6996	47.6808	32.7906	28.2675	48.9156	19.1861	35.6547	29.0525	43.0048	49.2838	50.8582	56.0719	58.6846	48.1529	43.4463	WBGene00007428
C08B6.8	20.3962	6.51961	7.80798	9.22357	7.26657	8.71501	5.7217	8.19766	9.4225	10.7704	5.64296	6.82749	9.38619	8.4754	6.75893	2.46884	3.80149	8.80269	0.963057	2.9963	WBGene00007429
C08B6.9	24.4755	29.1209	21.7973	27.1281	23.7232	22.2092	24.794	32.7906	21.6717	30.9649	21.4432	21.9997	31.7343	18.8342	24.2195	24.6884	32.3126	11.7369	17.335	29.963	WBGene00000142
C08C3.1	0	0	0	0	0	0	0	0	0	0	0	0	0	0	0	0	0	0	0	0	WBGene00001174
C08C3.2	5.43899	2.1732	4.22932	5.42563	7.26657	8.43388	5.7217	6.55813	6.59575	7.62903	4.51437	4.55166	7.15138	4.39465	8.73028	5.43146	9.50372	1.46711	4.81529	8.9889	WBGene00015590
C08C3.3	0	0	0	0	0	0.281129	0	0	0	0	0	0	0	0	0	0	0	0	0	0	WBGene00003102
C08C3.4	23.1157	24.7745	26.3519	26.043	22.4409	19.9602	9.53616	16.3953	16.9605	24.6822	19.1861	28.8272	25.4768	13.184	19.4319	11.3567	17.1067	7.33557	13.4828	4.49445	WBGene00015591
C08D8.1	0	0	0	0	0	0	0	0	0	0	0	0	0	0	0	0	0	0	0	0	WBGene00015592
C08D8.2	0	0	0	0.271281	0	0	0	0	1.8845	0.897533	0	0	0	0.313904	0.281622	0	0.950372	0	0.963057	1.49815	WBGene00006582
C08E3.1	0	0	0	0	0	0	0	0	0	0	0	0	0	0	0	0	0	0	0	0	WBGene00015593
C08E3.10	0	0	0	0	0	0	0	0	0	0	0	0	0	0	0	0	0	0	0	0	WBGene00015602
C08E3.11	0	0	0	0	0	0	0	0	0	0	0	0	0	0	0	0	0	0	0	0	WBGene00015603
C08E3.12	0	0	0	0	0	0	0	0	0	0	0	0	0	0	0	0	0	0	0	0	WBGene00015604
C08E3.13	0	0	0	0	0	0	0	0	0	0	0	0	0	0	0	0	0	0	0	0	WBGene00015605
C08E3.14	0	0	0	0	0	0	0	0	0	0	0	0	0	0	0	0	0	0	0	0	WBGene00044415
C08E3.15	0	0	0	0	0	0	0	0	0	0	0	0	0	0	0	0	0	0	0	0	WBGene00044416
C08E3.2	0	0	0	0	0	0	0	0	0	0	0	0	0	0	0	0	0	0	0	0	WBGene00015594
C08E3.3	0	0	0	0	0	0	0	0	0	0	0	0	0	0	0	0	0	0	0	0	WBGene00015595
C08E3.4	0	0	0	0	0	0	0	0	0	0	0	0	0	0	0	0	0	0	0	0	WBGene00015596
C08E3.5	0	0	0	0	0	0	0	0	0	0	0	0	0	0	0	0	0	0	0	0	WBGene00015597
C08E3.6	0	0	0	0	0	0	0	0	0	0	0	0	0	0	0	0	0	0	0	0	WBGene00015598
C08E3.7	0	0	0	0	0	0	0	0	0	0	0	0	0	0	0	0	0	0	0	0	WBGene00015599
C08E3.8	0	0	0	0	0	0	0	0	0	0	0	0	0	0	0	0	0	0	0	0	WBGene00015600
C08E3.9	0	0	0	0	0	0	0	0	0	0	0	0	0	0	0	0	0	0	0	0	WBGene00015601
C08E8.1	0	0	0	0	0	0	0	0	0	0	0	0	0	0	0	0	0	0	0	0	WBGene00007437
C08E8.10	0	0	0	0	0	0	0	0	0	0.448767	0	0	0	0	0	0	0	0	0	0	WBGene00077692
C08E8.11	0	0	0	0	0	0	0	0	0	0	0	0	0	0	0	0	0	0	0	0	WBGene00119201
C08E8.2	0	0	0	0	0	0	0	0	0	0	0	0	0	0	0	0	0	0	0	0	WBGene00007438
C08E8.3	0	0	0	0	0	0	0	0	0	0	0	0	0	0	0	0	0	0	0	0	WBGene00007439
C08E8.4	0	0	0	0	0	0	0	0	0	0	0	0	0	0	0	0	0	0	0	0	WBGene00007440
C08E8.5	0	0	0	0	0	0	0	0	0	0	0	0	0	0	0	0	0	0	0	0	WBGene00007441
C08E8.6	0	0	0	0	0	0	0	0	0	0	0	0	0	0	0	0	0	0	0	0	WBGene00007442
C08E8.9	0	0	0	0	0	0	0	0	0	0	0	0	0	0	0	0	0	0	0	0	WBGene00050891
C08F1.1	0	0	0	0	0	0	0	0	0	0	0	0	0	0	0	0	0	0	0	0	WBGene00015606
C08F1.10	0	0	0.325332	0.271281	0.213723	0.281129	0	0	0	0.448767	0	0	0	0	0	0	0	1.46711	0	0	WBGene00015613
C08F1.11	0	0	0.325332	0	0.213723	0	0	0	0.94225	0	0	0	0	0	0	0	0	0	0	0	WBGene00044417
C08F1.3	0	0	0	0	0	0	0	0	0	0	0	0	0	0	0	0	0	0	0	0	WBGene00015607
C08F1.4	0	0	0	0	0	0	0	0	0	0	0	0	0	0	0	0	0	0	0	0	WBGene00015608
C08F1.5	0	0	0	0	0	0	0	0	0	0	0	0	0	0	0	0	0	0	0	0	WBGene00015609
C08F1.6	0	0.434641	0.650665	0	0	0	0	0	0	0	0	0	0	0.313904	0	0	0	0	0.963057	0	WBGene00015610
C08F1.8	0	0	0	0	0	0	0	0	0	0	0	0	0	0	0	0	0	0	0	0	WBGene00015611
C08F11.1	0	0	0	0	0	0	0	0	0	0	0	0	0	0	0	0	0	0	0	0	WBGene00007450
C08F11.10	0	0	0	0	0	0	0	0	0	0	0	0	0	0	0	0	0	0	0	0	WBGene00007457
C08F11.11	0	0	0	0	0	0	0	0	0	0	0	0	0	0	0	0	0	0	0	0	WBGene00007458
C08F11.12	0	0	0	0	0	0	0	0	0	0	0	0	0	0	0	0	0	0	0	0	WBGene00007459
C08F11.13	0	0	0	0	0	0	0	0	0	0	0	0	0	0	0	0	0	0	0	0	WBGene00007460
C08F11.17	0	0	0	0	0	0	0	0	0	0	0	0	0	0	0	0	0	0	0	0	WBGene00045069
C08F11.2	0	0	0	0	0	0	0	0	0	0	0	0	0	0	0	0	0	0	0	0	WBGene00007451
C08F11.3	0	0	0	0	0	0	0	0	0	0	0	0	0	0	0	0	0	0	0	0	WBGene00007452
C08F11.4	0	0	0	0	0	0	0	0	0	0	0	0	0	0	0	0	0	0	0	0	WBGene00005684
C08F11.5	0	0	0	0	0	0	0	0	0	0	0	0	0	0	0	0	0	0	0	0	WBGene00007453
C08F11.7	0	0.434641	0	0	0.213723	0	0	0	0	0	0	0	0	0	0	0	0	0	0	0	WBGene00007454
C08F11.8	0	0	0	0	0	0	0	0	0	0	0	0	0	0	0	0	0	0	0	0	WBGene00007455
C08F11.9	0	0	0	0	0	0	0	0	0	0	0	0	0	0	0	0	0	0	0	0	WBGene00007456
C08F8.1	31.2742	53.4608	42.2932	49.1019	40.1799	37.3902	17.1651	21.3139	24.4985	24.6822	46.2723	55.3785	35.3099	52.108	37.1741	34.07	23.7593	19.0725	14.4459	20.9741	WBGene00007443
C08F8.15	0	0	0	0	0	0	0	0	0	0	0	0	0	0	0	0	0	0	0	0	WBGene00219217
C08F8.2	4.07925	9.12746	3.90399	8.13844	5.77051	3.37355	1.90723	3.27906	7.538	4.0389	3.38578	3.03444	4.02265	5.96417	6.19568	4.44392	6.6526	5.86846	5.77834	1.49815	WBGene00007444
C08F8.3	5.43899	4.34641	7.48264	10.58	19.6625	17.7112	5.7217	24.593	15.076	23.3359	6.77155	7.5861	9.38619	13.4979	22.5298	9.87537	15.2059	10.2698	13.4828	7.49075	WBGene00007445
C08F8.4	0	0	0	0	0	0	0	0	0	0	0	0	0	0	0	0	0	0	0	0	WBGene00007446
C08F8.5	0	0	0	0	0	0	0	0	0	0	0	0	0	0	0	0	0	0	0	0	WBGene00007447
C08F8.6	0	0	0	0	0	0	0	0	0	0	0	0	0	0	0	0	0	0	0	0	WBGene00007448
C08F8.7	0	0	0	0	0	0	0	0	0	0	0	0	0.446961	0.313904	0	0	0	0	0	0	WBGene00004309
C08F8.8	0	0	0.325332	0	0	0	0	0	0	0	0	0	0	0	0.563244	0	0	0	0	0	WBGene00003657
C08F8.9	19.0365	15.6471	12.0373	9.49485	8.33519	8.43388	5.7217	1.63953	0.94225	3.14137	3.38578	7.5861	4.46961	15.0674	5.91406	4.44392	2.85111	2.93423	0.963057	2.9963	WBGene00007449
C08G5.1	0	0	0	0	0	0	0	0	0	0	0	0	0	0	0	0	0	0	0	0	WBGene00015614
C08G5.2	0	0	0	0	0	0	0	0	0	0	0	0	0	0	0	0	0	0	0	0	WBGene00015615
C08G5.3	0	0	0	0	0	0	0	0	0	0	0	0	0	0	0	0	0	0	0	0	WBGene00015616
C08G5.4	0	0.434641	0	0	0	0.281129	0	0	0	0	0	0	0	0	0	0	0	0	0	0	WBGene00004926
C08G5.6	0	0	0	0	0	0	0	0	0	0	0	0	0	0	0	0	0	0	0	0	WBGene00015618
C08G5.7	0	0	0	0	0	0	0	0	0	0	0	0	0	0	0	0	0	0	0	1.49815	WBGene00044418
C08G9.1	0	0	0	0	0	0	0	0	0	0.448767	0	0	0	0	0	0	0	0	0.963057	0	WBGene00015619
C08G9.2	0	0	0	0	0	0	0	0	0	0.448767	0	0	0	0	0	0	0	0	0	1.49815	WBGene00015620
C08H9.1	0	0	0	0	0	0	0	0	0	0	0	0	0	0	0	0	0	0	0	0	WBGene00007462
C08H9.10	0	0	0	0	0	0	0	0	0	0	0	0	0	0	0	0	0	0	0	0	WBGene00007469
C08H9.11	0	0	0	0	0	0	0	0	0	0	0	0	0	0	0	0	0	0	0	0	WBGene00007470
C08H9.12	0	0	0	0	0	0	0	0	0	0	0	0	0	0	0	0	0	0	0	0	WBGene00007471
C08H9.13	0	0	0	0	0	0	0	0	0	0	0	0	0	0	0	0	0	0	0	0	WBGene00007472
C08H9.14	0	0	0	0	0	0	0	0	0	0	0	0	0	0	0	0	0	0	0	0	WBGene00007473
C08H9.15	0	0	0	0	0	0	0	0	0.94225	0	0	0	0	0	0	0	0	0	0	0	WBGene00007474
C08H9.16	0	5.65033	5.85598	7.3246	4.91562	5.34146	7.62893	6.55813	7.538	7.18027	6.77155	6.06888	10.7271	4.08075	4.50595	9.87537	8.55334	5.86846	1.92611	5.9926	WBGene00086566
C08H9.18	0	0	0	0	0	0	0	0	0	0	0	0	0	0	0	0	0	0	0	0	WBGene00206395
C08H9.2	13.5975	32.1634	49.1252	66.7352	53.6444	52.009	70.5676	70.4999	70.6687	56.9934	9.02873	34.8961	42.9083	60.8973	57.4509	46.4143	51.3201	57.2175	63.5618	98.8779	WBGene00007463
C08H9.3	1.35975	8.25818	4.22932	9.49485	5.34307	5.34146	3.81446	3.27906	2.82675	3.14137	6.77155	5.31027	5.8105	5.02246	11.8281	7.9003	8.55334	7.33557	10.5936	1.49815	WBGene00007464
C08H9.4	0	0	0	0	0	0	0	0	0	0	0	0	0	0	0	0	0	0	0	0	WBGene00007465
C08H9.5	0	0	0	0	0	0	0	0	0	0	0	0	0	0	0	0	0	0	0	0	WBGene00003862
C08H9.6	0	0	0	0	0	0	0	0	0	0	0	0	0	0	0	0	0	0	0	0	WBGene00007466
C08H9.7	0	0	0	0	0	0	0	0	0	0	0	0	0	0.313904	0	0	0	0	0	0	WBGene00007467
C09B7.1	0	0	0	0	0	0	0	1.63953	2.82675	0.897533	0	0	0	0	0	0.493769	0.950372	2.93423	0	0	WBGene00004780
C09B7.2	0	0.434641	0	0.542563	1.06861	2.24904	7.62893	4.9186	1.8845	6.28273	0	0	0.893923	1.56952	1.12649	4.93769	8.55334	7.33557	5.77834	4.49445	WBGene00015621
C09B8.1	0	0	0	0	0	0	0	0	0.94225	0	0	0	0	0	0	0	0	0	0.963057	2.9963	WBGene00002146
C09B8.3	0	0	0	0	0	0	0	0	0	0	0	0	0	0	0	0	0	0	0	0	WBGene00015622
C09B8.4	0	0.434641	0.325332	0.542563	0.427445	2.81129	3.81446	8.19766	2.82675	1.3463	0	0	0	1.25561	0.563244	1.97507	6.6526	4.40134	1.92611	2.9963	WBGene00015623
C09B8.5	0	0	0	0	0	0.281129	1.90723	0	0.94225	3.14137	0	0	0	0	0	0	0	7.33557	0.963057	1.49815	WBGene00015624
C09B8.6	0	0	0	0	0.641168	0	3.81446	1.63953	0.94225	0.897533	1.12859	0	0	0	0	0.493769	2.85111	1.46711	2.88917	1.49815	WBGene00002023
C09B8.7	0	0.434641	0.650665	0	0.213723	1.40565	3.81446	11.4767	4.71125	5.3852	0	0	0	0.627807	1.68973	6.41899	1.90074	1.46711	6.7414	4.49445	WBGene00003911
C09B8.8	0	0	0	0	0	0.281129	0	0	0	0	0	0	0	0	0	0	0	0	0	0	WBGene00015625
C09B9.1	0	0	0	0	0	0	0	0	0	0	0	0	0	0	0	0	0	0	0	0	WBGene00015626
C09B9.2	0	0	0	0	0	0	0	0	0	0	0	0	0	0	0	0	0	0	0	0	WBGene00015627
C09B9.3	0	0	0	0	0	0	0	0	0	0	0	0	0	0	0	0	0	0	0	0	WBGene00015628
C09B9.4	0	0	0	0	0	0	0	0	0	0	0	0	0	0	0	0	0	0	0	0	WBGene00015629
C09B9.6	0	0	0	0	0	0	0	0	0	0	0	0	0	0	0	0	0	0	0	0	WBGene00003448
C09B9.7	0	0	0	0	0	0	0	0	0	0	0	0	0	0	0	0	0	0	0	0	WBGene00015630
C09B9.8	0	0	0	0	0	0	0	0	0	0	0	0	0	0	0	0	0	0	0	0	WBGene00044484
C09C7.1	0	0	0	0	0	0	0	0	0	0	0	0	0	0	0	0	0	0	0	0	WBGene00006981
C09D1.1	0	0	0.975997	0.271281	0	0	0	0	0	0.897533	0	0	0	0	0	0	0	0	0	0	WBGene00006820
C09D1.2	0	0	0	0	0	0	0	0	0	0	0	0	0	0	0	0	0	0	0	0	WBGene00015631
C09D4.1	0	0	0	0	0	0.281129	0	0	0	0.448767	0	0	0	0	0	0.493769	0	0	0	0	WBGene00015632
C09D4.2	0	0	0.325332	0	0	0	0	0	0	0.448767	0	0	0	0	0	0	0	0	0	0	WBGene00015633
C09D4.3	0	0	0	0	0	0	0	0	0	0	0	0	0	0	0	0	0	0	0	0	WBGene00015634
C09D4.4	12.2377	31.2941	22.1226	26.043	28.4251	18.8357	22.8868	22.9535	29.2097	29.1698	21.4432	32.6202	16.9845	17.8925	19.1503	22.2196	19.0074	33.7436	26.9656	29.963	WBGene00015635
C09D4.5	311.382	253.83	220.901	175.519	150.888	132.693	106.805	50.8255	40.5167	14.3605	353.249	279.169	248.957	221.302	165.03	161.956	98.8386	16.1383	13.4828	14.9815	WBGene00004431
C09D4.6	0	0	0	0	0	0	0	0	0	0	0	0	0	0	0	0	0	0	0	0	WBGene00015636
C09D4.9	1.35975	0	0	0	0	0	0	0	0	0	0	0	0	0	0	0	0	0	0	0	WBGene00206357
C09D8.1	1.35975	0	0.650665	0	0.427445	4.7792	5.7217	4.9186	5.6535	6.28273	0	0	0	0	3.09784	6.91276	11.4045	10.2698	7.70446	1.49815	WBGene00004215
C09E10.2	0	0	0	0	0	0	0	0	0	0	0	0	0	0	0.563244	0	0	0	0	0	WBGene00000958
C09E7.1	0	0	0	0	0	0	0	0	0	0	0	0	0	0	0	0	0	0	0	0	WBGene00015637
C09E7.10	0	0	0	0	0	0	0	0	0	0	0	0	0	0	0	0	0	0	0	0	WBGene00044295
C09E7.2	0	0	0	0	0	0	0	0	0	0	0	0	0	0	0	0	0	0	0	0	WBGene00004102
C09E7.3	0	0	0	0	0	0	0	0	0	0	0	0	0	0	0	0	0	0	0	0	WBGene00003859
C09E7.4	1.35975	1.30392	0	0.271281	0	5.06033	7.62893	1.63953	3.769	1.79507	0	0	0	0.313904	1.97135	5.92522	4.75186	5.86846	2.88917	4.49445	WBGene00015638
C09E7.5	0	0	0	0	0.213723	0	0	0	0	0	0	0	0	0	0	0	0	0	0	0	WBGene00015639
C09E7.6	0	0	0.325332	0	0	0	0	0	0	0	0	0	0.446961	0.313904	0.281622	0	0	0	0	0	WBGene00015640
C09E7.7	2.7195	4.78105	4.22932	5.15435	7.05285	2.81129	3.81446	4.9186	0	1.79507	1.12859	5.31027	8.0453	6.27807	9.29352	4.44392	1.90074	1.46711	0.963057	1.49815	WBGene00015641
C09E7.8	4.07925	1.30392	1.95199	4.06922	5.55679	5.62259	1.90723	3.27906	1.8845	4.93643	2.25718	3.03444	4.46961	4.70856	7.60379	2.96261	3.80149	4.40134	2.88917	2.9963	WBGene00015642
C09E7.9	0	1.30392	1.30133	0.542563	0.854891	1.96791	1.90723	3.27906	0	1.3463	2.25718	3.03444	2.23481	0.313904	1.12649	1.48131	0	0	0.963057	0	WBGene00015643
C09E8.1	0	0	0	0	0	1.68678	3.81446	0	0	0	0	0	0	0	0	0.987537	0	0	0.963057	0	WBGene00015644
C09E8.2	0	0	0	0	0	0	0	0	0	0	0	0	0	0	0	0	0	0	0	0	WBGene00015645
C09E8.3	0	0	0	0	0	0	1.90723	1.63953	1.8845	1.79507	0	0	0	0	0.281622	0.987537	2.85111	2.93423	0.963057	2.9963	WBGene00015646
C09E8.4	0	0	0	0	0.641168	0.281129	0	0	0	0	0	0	0	0	0.844866	0.987537	0	0	0	0	WBGene00206410
C09E9.1	1.35975	2.60785	4.55465	5.15435	3.84701	7.87163	9.53616	6.55813	6.59575	5.83397	0	1.51722	3.12873	2.19733	3.37946	6.41899	5.70223	5.86846	2.88917	5.9926	WBGene00007476
C09F12.1	0	0	0	0	0	0	0	0	0	0	0	0	0	0	0	0	0	0	0	0	WBGene00000522
C09F12.2	0	0	0	0	0	0	0	0	0	0	0	0	0	0	0	0	0	0	0	0	WBGene00007482
C09F12.3	0	0	0	0	0	0	0	0	0	0	0	0	0	0	0	0	0	0	0	0	WBGene00007483
C09F5.1	0	0.434641	0	0	0	7.5905	5.7217	0	10.3647	4.93643	0	0.75861	0	0	3.37946	9.3816	4.75186	4.40134	10.5936	7.49075	WBGene00015647
C09F5.2	1.35975	1.73856	1.95199	2.71281	1.28234	3.93581	5.7217	1.63953	4.71125	8.97533	4.51437	3.03444	0.446961	1.25561	5.06919	4.93769	5.70223	1.46711	3.85223	4.49445	WBGene00015648
C09F5.3	0	0	0	0	0	0	0	0	0	0	0	0	0	0	0	0	0	0	0	0	WBGene00015649
C09F9.1	0	0	0	0	0	0	0	0	0	0	0	0	0	0	0	0	0	0	0	0	WBGene00007478
C09F9.2	0	0	0	0	0	0	0	0	0	0	0	0	0	0	0	0	0	0	0	0	WBGene00007479
C09F9.3	0	0	0	0	0	0	0	0	0	0	0	0	0	0	0	0	0	1.46711	0	2.9963	WBGene00007480
C09G1.1	0	0	0	0	0	0	0	0	0	0	0	0	0	0	0	0	0	0	0	0	WBGene00004103
C09G1.2	0	0	0	0	0	0	0	0	0	0	0	0	0	0	0	0	0	0	0	0	WBGene00007484
C09G1.3	0	0	0	0	0	0	0	0	0.94225	0	0	0.75861	0	0	0	0	0	0	0	0	WBGene00007485
C09G1.4	0	0.434641	0	0	0	0.281129	0	0	0	0.448767	0	0	0	0	0	0	0	0	0.963057	0	WBGene00007486
C09G1.5	0	0	0.325332	0	0	0	0	0	1.8845	0.448767	0	0	0	0	0	0.493769	0	0	0	0	WBGene00007487
C09G12.1	0	0	0	0	0	0	0	0	0	0	0	0	0	0	0	0	0	0	0	0	WBGene00015651
C09G12.10	0	0	0	0	0	0	0	0	0	0	0	0	0	0	0	0	0	0	0	0	WBGene00023462
C09G12.11	0	0	0	0	0	0	0	0	0	0	0	0	0	0	0	0	0	0	0	0	WBGene00023463
C09G12.16	0	0	0	0	0	0	0	0	0	0	0	0	0	0	0	0	0	0	0	0	WBGene00023474
C09G12.17	0	0	0	0	0	0	0	0	0	0	0	0	0	0	0	0	0	0	0	0	WBGene00044470
C09G12.2	0	0	0	0	0	0	0	0	0	0	0	0	0	0	0	0	0	0	0	0	WBGene00015652
C09G12.3	0	0	0	0	0	0	0	0	0	0	0	0	0	0	0	0	0	0	0	0	WBGene00015653
C09G12.5	0	0	0	0	0	0	0	0	0	0	0	0	0	0	0	0	0	0	0	0	WBGene00015655
C09G12.6	0	0	0	0	0	0	0	0	0	0	0	0	0	0	0	0	0	0	0	0	WBGene00015656
C09G12.8	2.7195	6.08497	6.50665	5.42563	5.55679	7.02824	9.53616	4.9186	7.538	9.4241	2.25718	5.31027	4.02265	3.45294	5.91406	6.91276	0.950372	2.93423	7.70446	11.9852	WBGene00000424
C09G12.9	0	0	0	0.271281	0	0	0	0	0	0	0	0	0.446961	0	0	0	0	0	0	0	WBGene00015658
C09G4.1	4.07925	5.21569	4.55465	10.8513	7.26657	5.34146	1.90723	8.19766	2.82675	4.48767	0	5.31027	3.12873	1.25561	4.22433	5.43146	5.70223	4.40134	0.963057	1.49815	WBGene00002043
C09G4.2	1.35975	0	0.975997	1.62769	2.13723	0.843388	9.53616	4.9186	6.59575	1.79507	2.25718	0	0	1.25561	0.844866	1.48131	7.60297	5.86846	9.63057	8.9889	WBGene00015650
C09G4.3	25.8352	21.2974	28.6292	39.3358	47.2327	46.1052	38.1446	63.9418	59.3617	67.315	22.5718	35.6547	43.3552	32.9599	47.8757	53.8208	67.4764	64.553	77.0446	83.8964	WBGene00001051
C09G4.4	12.2377	17.8203	14.64	14.3779	28.8526	19.9602	20.9796	9.83719	16.9605	19.297	10.1573	15.1722	17.4315	15.6952	23.6562	25.676	18.0571	23.4738	12.5197	7.49075	WBGene00044001
C09G4.5	0	0	0	0	0	0	0	0	0	0	0	0	0	0.313904	0	0	0	0	0	0	WBGene00003224
C09G5.1	0	0	0	0	0	0	0	0	0	0	0	0	0	0	0	0	0	0	0	0	WBGene00001586
C09G5.13	0	0	0	0	0	0	0	0	0	0	0	0	0	0	0	0	0	0	0	0	WBGene00206538
C09G5.2	13.5975	17.3856	11.3866	17.0907	10.045	11.8074	5.7217	22.9535	9.4225	13.9118	18.0575	14.4136	18.3254	15.0674	12.1097	10.3691	12.3548	16.1383	12.5197	5.9926	WBGene00007488
C09G5.3	0	0	0	0	0	0	0	0	0	0	0	0	0	0	0	0	0	0	0	0	WBGene00000655
C09G5.4	0	0	0	0	0	0	0	0	0	0	0	0	0	0	0	0	0	0	0	0	WBGene00000616
C09G5.5	0	0.434641	0.325332	0.542563	0	0	0	0	0	0	0	0	0	0	0	0	0	0	0	0	WBGene00000656
C09G5.6	0	0	0	0	0	0	0	0	0	0	0	0	0	0	0	0	0	0	0	0	WBGene00000251
C09G5.7	0	0	0	0	0	0.281129	0	0	0	0	0	0	0	0	0.281622	0.493769	1.90074	0	0	0	WBGene00007489
C09G5.8	0	0	0	0	0	0	0	0	0	0	0	0	0	0	0	0	0	0	0	0	WBGene00007490
C09G9.1	4.07925	6.08497	10.736	10.8513	14.9606	12.3697	11.4434	8.19766	20.7295	10.7704	7.90014	10.6205	5.8105	5.96417	12.1097	6.91276	9.50372	7.33557	20.2242	7.49075	WBGene00007492
C09G9.2	6.79874	11.3007	17.8933	14.6492	17.5253	15.7433	11.4434	22.9535	16.0182	17.0531	12.4145	12.1378	15.6436	14.1257	16.8973	12.838	12.3548	17.6054	19.2611	16.4796	WBGene00007493
C09G9.3	0	0	0	0	0	0	0	0	0	0	0	0	0	0	0	0	0	0	0	0	WBGene00007494
C09G9.4	0	0	0	0	0	0	0	0	0	0	0	0	0	0	0	0	0	0	0	0	WBGene00006409
C09G9.5	0	0	0	0	0	0	0	0	0	0	0	0	0	0	0	0	0	0	0	0	WBGene00007495
C09G9.6	21.756	24.3399	46.8479	68.9055	86.5577	86.869	85.8255	101.651	102.705	87.9582	12.4145	55.3785	50.5066	44.2604	75.1931	80.9781	85.5334	96.8296	130.976	137.83	WBGene00003864
C09G9.7	0	0	0	0	0	0	0	0	0	0	0	0	0	0	0	0	0	0	0	0	WBGene00007496
C09G9.8	0	0	0	0	0	0	0	0	0	0	0	0	0	0	0	0	0	0	0	0	WBGene00007497
C09H10.1	0	0	0	0	0	0	0	0	0	0	0	0	0	0	0	0	0	0	0	0	WBGene00004455
C09H10.10	5.43899	8.25818	8.78397	9.49485	8.54891	7.87163	3.81446	1.63953	4.71125	8.52656	6.77155	6.06888	11.621	5.65027	9.57515	7.9003	1.90074	5.86846	2.88917	11.9852	WBGene00007504
C09H10.2	255.633	219.928	183.487	145.949	134.859	133.255	127.785	52.465	25.4407	9.4241	250.547	191.928	214.094	208.118	108.143	86.9033	40.866	13.204	6.7414	7.49075	WBGene00004454
C09H10.3	20.3962	33.0327	29.6052	19.5323	17.0978	12.0886	9.53616	14.7558	16.0182	17.9507	20.3147	16.6894	17.8785	19.1481	18.8687	18.7632	19.0074	7.33557	14.4459	17.9778	WBGene00003831
C09H10.4	1.35975	0	0.325332	0	0	0.281129	0	0	0	0	0	0	0	0	0	0	0	0	0	0	WBGene00043120
C09H10.5	1.35975	0	0	0	0	0	0	0	0	0	0	0	0	0	0	0	0	0	0	0	WBGene00007499
C09H10.6	4.07925	13.0392	14.64	20.8887	16.8841	17.43	15.2579	16.3953	13.1915	26.0285	21.4432	16.6894	22.3481	14.1257	20.84	21.2321	25.66	17.6054	20.2242	16.4796	WBGene00007500
C09H10.7	0	0	0	0	0.213723	0	0	0	0	0	0	0.75861	0.446961	0.627807	0	0	0.950372	0	0	0	WBGene00007501
C09H10.8	0	0	0	0	0	0	0	0	0	0	0	0	0	0	0	0	0	0	0	0	WBGene00007502
C09H10.9	0	0	0	0	0	0	0	0	0	0	0	0	0	0	0	0	0	0	0	0	WBGene00007503
C09H5.1	0	0	0	0	0	0	0	0	0	0	0	0	0	0	0	0	0	0	0	0	WBGene00015659
C09H5.2	1.35975	0	0	0	0	0	0	0	0	0	0	0	0	0	0	0	0	0	0	0	WBGene00015660
C09H5.3	0	0	0	0	0	0	0	0	0	0	0	0	0	0	0	0	0	0	0	0	WBGene00006188
C09H5.4	0	0	0	0	0	0	0	0	0	0	0	0	0	0	0	0	0	0	0	0	WBGene00006190
C09H5.5	0	0	0	0	0	0	0	0	0	0	0	0	0	0	0	0	0	0	0	0	WBGene00006191
C09H5.6	0	0	0	0	0	0	0	0	0	0	0	0	0	0	0	0	0	0	0	0	WBGene00006180
C09H5.7	0	0	0	0	0	0	0	0	0	0	0	0	0	0	0	0	0	0	0	0	WBGene00015661
C09H5.9	0	0	0	0	0	0	0	0	0	0	0	0	0	0	0	0	0	0	0	0	WBGene00006179
C09H6.1	0	4.78105	9.10931	10.8513	11.541	12.932	11.4434	8.19766	11.307	8.0778	4.51437	2.27583	8.93923	10.0449	10.42	15.3068	16.1563	27.8752	24.0764	7.49075	WBGene00005009
C09H6.2	0	0	1.30133	0	0	0.562259	0	4.9186	1.8845	3.59013	0	0	0.446961	0.313904	0.281622	1.48131	0.950372	1.46711	0	0	WBGene00002999
C09H6.3	9.51824	9.5621	8.78397	10.0374	8.12146	8.43388	5.7217	9.83719	9.4225	13.0142	1.12859	8.34471	6.25746	9.10321	10.1384	9.87537	1.90074	2.93423	5.77834	2.9963	WBGene00003136
C10A4.1	0	0	0	0	0	0.843388	1.90723	0	0	0.448767	0	0	0	0	0	0.987537	0	0	0	0	WBGene00015662
C10A4.10	0	0	0	0	0	0	0	0	0	0	0	0	0	0	0	0	0	0	0	0	WBGene00050957
C10A4.13	0	0	0	0	0	0	0	0	0	0	0	0	0	0	0	0	0	0	0	0	WBGene00206485
C10A4.2	0	0	0	0	0	0	0	0	0	0	0	0	0	0	0	0	0	0	0	0	WBGene00015663
C10A4.3	0	0	0	0	0	0	0	0	0	0	1.12859	0	0	0	0	0	0	0	0	0	WBGene00015664
C10A4.4	0	0	0	0	0	0	0	0	0	0	0	0	0	0	0	0	0	0	0	0	WBGene00015665
C10A4.5	0	0	0	0	0.213723	0	0	0	0	0.448767	0	0	0	0	0	0	1.90074	1.46711	0	0	WBGene00015666
C10A4.6	0	0	0	0	0.213723	0	1.90723	0	0	0.448767	0	0	0	0	0	0	0	0	1.92611	0	WBGene00015667
C10A4.7	0	0	0	0	0	0	1.90723	0	0	0	0	0	0	0	0	0	0	0	0	0	WBGene00015668
C10A4.8	0	0	0.325332	0	0	0	0	0	0	0	0	0	0	0.627807	0.281622	0	0	0	0	0	WBGene00003380
C10A4.9	0	0	0	0	0	0	0	0	0	0	0	0	0	0	0	0	0	0	0	0	WBGene00045456
C10B5.1	4.07925	3.04249	2.92799	3.79794	2.7784	2.53017	1.90723	0	2.82675	1.3463	2.25718	5.31027	4.46961	2.19733	2.81622	0	3.80149	1.46711	2.88917	4.49445	WBGene00015670
C10B5.3	0	0	0	0	0	0	0	0	0	0	0	0	0	0	0	0	0	0	0	0	WBGene00015671
C10C5.1	0	0.434641	0	0	0.213723	0	0	0	0	0	0	0	0	0	0	0	0	0	0	0	WBGene00007505
C10C5.2	0	0	0	0	0	0	0	0	0	0	0	0	0	0	0	0	0	0	0	0	WBGene00007506
C10C5.3	0	0	0.325332	0	0	0	0	0	0	0	0	0	0	0	0	0	0	0	0	0	WBGene00007507
C10C5.4	0	0	0	0	0	0	0	0	0	0	0	0	0	0	0	0	0	0	0	0	WBGene00007508
C10C5.5	0	0	0	0	0	0	0	0	0	0	0	0	0	0	0	0	0	0	0	0	WBGene00007509
C10C5.6	10.878	17.3856	16.5919	18.4471	20.5174	17.43	17.1651	34.4302	17.9027	19.297	12.4145	15.1722	16.5376	15.3813	19.9952	26.6635	20.9082	23.4738	30.8178	20.9741	WBGene00000911
C10C5.7	0	0	0	0	0	0	0	0	0	0	0	0	0	0	0	0	0	0	0	0	WBGene00007511
C10C6.1	10.878	26.9477	28.6292	41.7773	32.9133	33.1733	49.588	32.7906	49.9392	41.7353	13.5431	36.4133	36.2039	29.507	35.766	39.9953	49.4193	80.6913	43.3376	49.4389	WBGene00002192
C10C6.2	0	0	0	0	0	0	0	0	0	0	0	0	0	0	0	0	0	0	0	0	WBGene00007006
C10C6.3	0	0	0	0	0	0	0	0	0	0	0	0	0	0	0	0	0	0	0	0	WBGene00007512
C10C6.5	2.7195	6.51961	7.15731	8.681	8.76263	8.15275	0	4.9186	5.6535	8.52656	5.64296	3.79305	6.70442	6.27807	12.3914	4.44392	8.55334	7.33557	13.4828	8.9889	WBGene00007513
C10C6.6	8.15849	8.25818	15.2906	11.3938	10.6861	16.8678	22.8868	9.83719	9.4225	17.9507	7.90014	12.8964	17.8785	10.9866	10.9833	16.2944	11.4045	24.9409	25.0395	10.487	WBGene00007514
C10C6.7	0	0	0	0.271281	0.213723	0.562259	0	0	0	0	0	0.75861	0	0.313904	0.844866	0	0	0	0.963057	0	WBGene00007515
C10E2.1	0	0	0	0	0	0	0	0	0	0	0	0	0	0	0	0	0	0	0	0	WBGene00015672
C10E2.2	0	0	0	0	0	0	0	0	0	0	0	0	0	0	0	0	0	1.46711	0.963057	1.49815	WBGene00015673
C10E2.3	0	0	0	0	0	0	0	0	0	0	0	0	0	0	0	0	0	0	0	0	WBGene00001837
C10E2.4	0	0	0	0	0	0	0	0	0	0.448767	0	0	0	0	0	0	0	1.46711	0	0	WBGene00015674
C10E2.5	0	0	0	0	0	0	0	0	0	0	0	0	0	0	0	0	0	0	0	0	WBGene00015675
C10E2.6	0	0	0.650665	0.813844	0.213723	3.09242	15.2579	37.7092	16.9605	10.7704	2.25718	0	0	0.941711	1.68973	7.40653	18.0571	14.6711	20.2242	10.487	WBGene00015676
C10F3.1	0	6.51961	11.3866	15.463	21.1585	22.7715	20.9796	24.593	17.9027	25.5797	4.51437	13.655	15.6436	15.0674	26.4725	22.2196	23.7593	26.4081	28.8917	10.487	WBGene00015677
C10F3.2	0	0	0	0	0	0	0	0	0	0	0	0	0	0	0	0	0	0	0	0	WBGene00000979
C10F3.3	0	0	0	0	0	0	0	0	0	0	0	0	0	0	0	0	0	0	0	0	WBGene00000069
C10F3.4	0	0	0	0	0	0.562259	0	0	0	0	0	0	0	0	0	0.493769	0	0	0.963057	0	WBGene00015678
C10F3.5	1.35975	0	0.325332	0	0	1.40565	1.90723	1.63953	0.94225	2.6926	0	0	0	0	0.844866	2.46884	2.85111	1.46711	2.88917	0	WBGene00003954
C10F3.6	0	0	0	0	0	0	0	0	0	0	0	0	0	0	0	0	0	0	0	0	WBGene00001508
C10F3.7	0	0	0	0	0	0	0	0	0	0	0	0	0	0	0	0	0	0	0	0	WBGene00015679
C10G11.1	0	0	0	0	0	0	0	0	0	0	0	0	0	0	0	0	0	0	0	0	WBGene00015685
C10G11.10	0	0	0	0	0	0	0	0	0	0	0	0	0	0	0	0	0	0	0	0	WBGene00015690
C10G11.2	0	0	0	0	0	0	0	0	0	0	0	0	0	0	0	0	0	0	0	0	WBGene00005273
C10G11.3	0	0	0	0	0	0	0	0	0	0	0	0	0	0	0	0	0	0	0	0	WBGene00005274
C10G11.4	0	0	0	0	0	0	0	0	0	0	0	0	0	0	0	0	0	0	0	0	WBGene00005272
C10G11.5	12.2377	10.4314	13.3386	12.2077	16.4566	12.932	5.7217	14.7558	16.9605	15.7068	5.64296	10.6205	10.7271	11.3005	11.5465	9.3816	6.6526	13.204	9.63057	10.487	WBGene00004068
C10G11.6	0	0	0	0	0	0.281129	0	0	0	0	0	0	0	0	0	0	0	0	0	0	WBGene00015686
C10G11.7	28.5547	18.2549	31.8826	27.942	39.5387	46.3864	43.8663	65.5813	52.766	56.9934	19.1861	23.5169	26.8177	24.1706	41.9617	36.5389	48.469	52.8161	54.8943	44.9445	WBGene00015687
C10G11.8	0	0	0	0	0	0	0	0	0	0	0	0	0	0	0	0	0	0	0	0	WBGene00015688
C10G11.9	0	0	0	0	0	0	0	0	0	0	0	0	0	0	0	0	0	0	0	0	WBGene00015689
C10G6.1	0	0	0.325332	0	0.213723	0.281129	1.90723	3.27906	1.8845	2.6926	0	0	0	0	0	0.987537	0.950372	4.40134	0.963057	0	WBGene00015680
C10G8.1	0	0	0	0	0	0	0	0	0	0	0	0	0	0	0	0	0	0	0	0	WBGene00005183
C10G8.2	0	0	0	0	0	0	0	0	0	0	0	0	0	0	0	0	0	0	0	0	WBGene00015681
C10G8.3	0	0	0	0	0	0	0	0	0	0	0	0	0	0	0	0	0	0	0	0	WBGene00015682
C10G8.4	0	0	0.650665	0	0	0	0	0	0	0	0	0	0	0	0	0	0	0	0	0	WBGene00015683
C10G8.5	0	0	0.325332	0.271281	0	0	0	0	0	0	1.12859	0	0	0	0.281622	0.493769	0	0	0	0	WBGene00003567
C10G8.6	0	0	0	0	0	0	0	0	0	0	0	0	0	0	0	0	0	0	0	0	WBGene00000455
C10G8.7	0	0	0	0	0	0	0	0	0	0	0	0	0	0	0	0	0	0	0	0	WBGene00000454
C10G8.8	2.7195	0	0	0	0	1.12452	0	8.19766	1.8845	0.448767	0	0.75861	0	0	0	2.46884	0.950372	2.93423	1.92611	5.9926	WBGene00015684
C10H11.1	4.07925	4.34641	4.87998	5.69691	4.7019	4.7792	5.7217	11.4767	7.538	6.7315	2.25718	3.79305	3.12873	2.19733	12.1097	18.7632	11.4045	13.204	13.4828	7.49075	WBGene00015691
C10H11.10	29.9145	23.036	42.2932	79.2142	84.2067	89.118	76.2893	60.6627	57.4772	36.3501	15.8003	34.8961	65.2564	57.1305	90.6823	83.9407	43.7171	71.8886	46.2267	31.4611	WBGene00015698
C10H11.3	0	0	0	0	0	0	0	0	0	0	0	0	0	0	0	0	0	0	0	0	WBGene00015692
C10H11.4	1.35975	0	0	0	0	1.96791	7.62893	0	0.94225	1.79507	0	0	0	0	1.40811	1.97507	2.85111	0	0.963057	0	WBGene00015693
C10H11.5	0	0	0	0	0	0	0	0	0	0	0	0	0	0	0	0	0	0	0	0	WBGene00015694
C10H11.6	0	0	0	0.271281	0	0	0	1.63953	0	0	0	0	0	0	0	0	0	0	0	0	WBGene00015695
C10H11.7	0	0	0	0	0	0	0	0	0	0	0	0	0	0	0	0	0	0	0	0	WBGene00015696
C10H11.8	0	0	0	0	0.427445	0	0	0	0	0	1.12859	0	0	0	0.281622	0	0	0	0	0	WBGene00015697
C10H11.9	19.0365	30.4249	24.0746	24.4153	26.5016	18.8357	32.4229	29.5116	16.0182	18.3994	12.4145	17.448	23.242	27.3096	28.1622	18.7632	21.8585	36.6779	28.8917	17.9778	WBGene00002694
C11D2.1	0	0	0	0	0	0	0	0	0	0	0	0	0	0	0	0	0	0	0	0	WBGene00015699
C11D2.2	0	0	0	0	0	0	0	0	0	0	0	0	0	0	0	0	0	0	0	0	WBGene00015700
C11D2.3	1.35975	0	0.325332	0	0.213723	0	0	1.63953	0.94225	0	0	0	0	0	0.563244	0	0	0	0	0	WBGene00015701
C11D2.4	13.5975	9.12746	18.8693	18.4471	15.1743	16.3055	17.1651	16.3953	14.1337	21.092	9.02873	11.3792	9.83315	12.2422	18.587	13.3318	15.2059	8.80269	12.5197	16.4796	WBGene00015702
C11D2.6	0	0	0	0	0	0	0	0	0	0	0	0	0	0	0	0	0	0	0	0	WBGene00006809
C11D2.7	12.2377	15.2124	12.688	13.5641	9.83124	7.30937	3.81446	4.9186	3.769	9.4241	5.64296	14.4136	8.0453	14.7535	11.8281	10.8629	8.55334	4.40134	3.85223	4.49445	WBGene00015703
C11D9.1	0	0	0	0	0	1.40565	0	0	0	0	0	0	0	0	0	0	1.90074	0	0.963057	0	WBGene00015704
C11E4.1	0	0	0	0	0	0	0	0	0	0	0	0	0	0	0	0	0	0	0	0	WBGene00007516
C11E4.2	0	0	0	0	0	0	0	0	0	0	0	0	0	0	0	0	0	0	0	0	WBGene00007517
C11E4.3	0	0	0	0	0	0	0	0	0	0	0	0	0	0	0	0	0	0	0	0	WBGene00007518
C11E4.6	0	0	0	0	0	0	1.90723	0	0	0.448767	0	0	0	0	0	1.48131	0.950372	0	0	1.49815	WBGene00007520
C11E4.7	0	0	0	0	0	0	0	0	0	0	0	0	0	0	0	0	0	0	0	0	WBGene00007521
C11E4.8	0	0	0	0	0	0	0	0	0	0	0	0	0	0	0	0	0	0	0	0	WBGene00007522
C11G10.1	0	0	0	0	0	0	0	0	0	0	0	0	0	0	0	0	0	0	0	0	WBGene00007525
C11G10.2	0	0	0	0	0	0	0	0	0	0	0	0	0	0	0	0	0	0	0	0	WBGene00007526
C11G6.1	0	0	0.650665	0	0	3.09242	1.90723	8.19766	4.71125	6.7315	1.12859	0.75861	0	0.627807	3.94271	8.88784	7.60297	10.2698	8.66751	8.9889	WBGene00006384
C11G6.2	0	0	0	0	0	0	0	0	0	0	0	0	0	0	0	0	0	0	0	0	WBGene00007523
C11G6.4	0	0	0	0	0	0	1.90723	0	0	0.448767	0	0	0	0	0	0	0	0	0.963057	0	WBGene00003624
C11H1.2	0	0	0	0	0	1.40565	3.81446	3.27906	1.8845	1.3463	0	0	0	0	0.281622	0.493769	0	0	0	1.49815	WBGene00007528
C11H1.3	0	0	0	0	0.213723	1.12452	3.81446	6.55813	0	6.7315	0	0	0	0	0.563244	2.46884	3.80149	7.33557	4.81529	0	WBGene00007529
C11H1.4	0	0	0	0	0	0	0	0	0	0.448767	0	0	0	0	0	0	0	0	0	0	WBGene00004191
C11H1.5	0	0	0	0	0	0	0	0	0	0	0	0	0	0	0	0	0	0	0	0	WBGene00007530
C11H1.7	0	0.434641	0	0	0	0	0	0	0	0	0	0	0	0	0	0.987537	0.950372	0	0	0	WBGene00007531
C11H1.8	0	0	0	0	0	1.12452	3.81446	0	0	0	0	0	0	0	0.563244	0.987537	0	0	0	0	WBGene00007532
C11H1.9	0	0	0	0	0	0	0	0	0	0.897533	0	0	0	0	0	0	0	0	0	2.9963	WBGene00023500
C12C8.1	0	0	0	0	0	0	0	0	0	0.448767	0	0	0	0.313904	0	0.987537	0.950372	0	0	0	WBGene00002026
C12C8.2	0	0	0	0	0	0	0	0	0	0	0	0	0	0	0	0	0	0	0	0	WBGene00007533
C12C8.3	0	0	0.325332	0	1.28234	0.562259	0	0	0.94225	0	0	0	0	0.313904	0.563244	0	0	0	0	0	WBGene00003026
C12D12.1	0	0	0	0	0	0	1.90723	0	0	0	0	0	0	0	0	0	0	0	0	0	WBGene00015713
C12D12.2	0	0	0	0.542563	0.854891	0.281129	1.90723	0	0	0.448767	0	0	0	0	0	0	0	0	0	0	WBGene00001620
C12D12.3	0	0	0	0	0	0	0	0	0	0	0	0	0	0	0	0	0	0	0	0	WBGene00015714
C12D12.4	0	0	0	0	0	0	0	0	0	0	0	0	0	0	0	0	0	0	0	0	WBGene00015715
C12D12.5	0	0	0	0	0	0	1.90723	0	0	0	0	0	0	0	0	0	0.950372	0	0	0	WBGene00015716
C12D5.10	0	0	0	0	0	0	0	0	0	0	0	0	0	0	0	0	0	0	0	0	WBGene00015711
C12D5.11	0	0	0	0	0	0	0	0	0	0	0	0	0	0	0	0	0	0	0	0	WBGene00015712
C12D5.2	0	0	0	0	0	0	0	0	0	0	0	0	0	0	0	0	0	0	0	0	WBGene00015705
C12D5.3	0	0	0	0	0	0	0	0	0	0	0	0	0	0	0	0	0	0	0	0	WBGene00015706
C12D5.4	0	0	0	0	0	0	0	0	0	0	0	0	0	0	0	0	0	0	0	0	WBGene00015707
C12D5.5	0	0	0	0	0	0	0	0	0	0	0	0	0	0	0	0	0	0	0	0	WBGene00015708
C12D5.7	0	0	0	0	0	0	0	0	0	0	0	0	0	0	0	0.493769	0	0	0	0	WBGene00015709
C12D5.8	0	0	0	0	0	0	0	0	0	0	0	0	0	0	0	0	0	0	0	0	WBGene00003684
C12D5.9	0	0	0	0	0	0	0	0	0	0	0	0	0	0	0	0	0	0	0	0	WBGene00015710
C12D8.1	16.317	17.3856	16.2666	20.8887	27.3565	29.7997	24.794	19.6744	24.4985	22.8871	11.2859	15.9308	21.0072	19.7759	27.8806	29.1323	25.66	16.1383	15.4089	20.9741	WBGene00007534
C12D8.10	12.2377	17.8203	34.1599	50.4583	57.2777	58.1938	47.6808	86.8952	57.4772	65.9687	20.3147	42.4822	37.0978	27.6235	50.4103	49.8706	56.0719	73.3557	44.3006	56.9297	WBGene00000102
C12D8.11	6.79874	13.9085	11.0613	15.463	10.2587	6.74711	15.2579	11.4767	15.076	9.87286	4.51437	14.4136	8.0453	12.8701	10.1384	4.93769	8.55334	10.2698	10.5936	2.9963	WBGene00004405
C12D8.12	0	0	0	0	0	0	0	0	0	0	0	0	0	0	0	0	0	0	0	0	WBGene00006226
C12D8.13	0	0	0	0	0	0	0	0	0	0	0	0	0	0	0	0	0	0	0	0	WBGene00007540
C12D8.14	0	0	0	0	0	0	0	0	0	0	0	0	0	0	0	0	0	0	0	0	WBGene00007541
C12D8.15	0	0	0	0	0	0	0	0	0	0	0	0	0	0	0	0	0	0	0	0	WBGene00007542
C12D8.16	0	0	0	0	0	0	0	0	0	0	0	0	0	0	0	0	0	0	0	0	WBGene00007543
C12D8.17	0	0	0	0	0	0	0	0	0	0	0	0	0	0	0	0	0	0	0	0	WBGene00007544
C12D8.18	0	0	0	0	0	0	0	0	0	0	0	0	0.446961	0	0	0	0	0	0	0	WBGene00044174
C12D8.19	0	0	0	0	0	0	0	0	0	0	0	0	0	0	0	0	0	0	0	0	WBGene00044175
C12D8.20	0	0	0	0	0	0	0	0	0	0	0	0	0	0	0	0	0	0	0	0	WBGene00194780
C12D8.21	0	0	0	0	0	0	0	0	0	0	0	0	0	0	0	0	0	0	0	0	WBGene00195157
C12D8.4	0	0	0	0	0	0	0	0	0	0	0	0	0	0	0	0	0	0	0	0	WBGene00007535
C12D8.5	0	0	0	0	0	0	0	0	0	0	0	0	0	0	0	0	0	0	0	0	WBGene00007536
C12D8.6	0	0	0	0	0	0	0	0	0	0	0	0	0	0	0	0	0	0	0	0	WBGene00007537
C12D8.8	0	0	0	0	0	0	0	0	0	0	0	0	0	0	0	0	0	0	0	0	WBGene00000721
C12D8.9	0	0	0	0	0	0	0	0	0	0	0	0	0	0	0	0	0	0	0	0	WBGene00007538
C13A10.1	0	0	0	0	0	0.281129	0	0	0	0	0	0	0	0	0	0.493769	0	0	0	0	WBGene00015728
C13A10.2	0	0	0	0	0	0	0	0	0.94225	0	0	0	0	0	0	0.493769	0	0	0	0	WBGene00015729
C13A2.1	0	0	0	0	0	0	0	0	0	0	0	0	0	0	0	0	0	0	0	0	WBGene00015718
C13A2.10	0	0	0	0	0	0	0	0	0	0	0	0	0	0	0	0	0	0	0	0	WBGene00015726
C13A2.11	0	0	0	0	0	0	0	0	0	0	0	0	0	0	0	0	0	0	0	0	WBGene00015727
C13A2.12	0	0	0	0	0	0	0	0	0	0	0	0	0	0	0	0	0	0	0	0	WBGene00044547
C13A2.2	0	0	0	0	0	0	0	0	0	0	0	0	0	0	0	0	0	0	0	0	WBGene00015719
C13A2.3	0	0	0	0	0	0	0	0	0	0	0	0	0	0	0	0	0	0	0	0	WBGene00015720
C13A2.4	0	0	0	0	0	0	0	0	0	0	0	0	0	0	0	0	0	0	0	0	WBGene00015721
C13A2.5	0	0	0	0	0	0	0	0	0	0	0	0	0	0	0	0	0	0	0	0	WBGene00015722
C13A2.6	0	0	0	0	0	0	0	0	0	0	0	0	0	0	0	0	0	0	0	0	WBGene00015723
C13A2.7	0	0	0	0	0	0	0	0	0	0	0	0	0	0	0	0	0	0	0	0	WBGene00015724
C13A2.9	0	0	0	0	0	0	0	0	0	0	0	0	0	0	0	0	0	0	0	0	WBGene00015725
C13B4.1	1.35975	3.04249	10.4106	7.86716	12.1822	13.4942	7.62893	6.55813	9.4225	13.9118	6.77155	5.31027	9.38619	7.21979	11.8281	13.3318	8.55334	7.33557	9.63057	4.49445	WBGene00007545
C13B4.2	33.9937	30.8595	29.6052	46.3891	46.3778	48.9165	57.217	44.2674	48.0547	41.7353	39.5007	18.9653	33.9691	32.646	49.0022	39.0077	39.9156	46.9477	47.1898	70.413	WBGene00006856
C13B7.1	0	0	0	0	0	0	0	0	0	0	0	0	0	0	0	0	0	0	0	0	WBGene00015730
C13B7.2	0	0	0	0	0	0	0	0	0	0	0	0	0	0	0	0	0	0	0	0	WBGene00006171
C13B7.3	0	0	0	0	0	0	0	0	0	0	0	0	0	0	0	0	0	0	0	0	WBGene00005137
C13B7.4	0	0	0	0	0.213723	0	0	0	0	0	0	0	0	0	0	0	0	0	0	0	WBGene00005148
C13B7.5	0	0	0	0	0	0	0	0	0	0	0	0	0	0	0	0	0	0	0	0	WBGene00006170
C13B7.6	0	0.434641	0.325332	0	0	0	0	0	0	0	1.12859	0	0.446961	0.313904	0	0.493769	0	0	0	0	WBGene00015731
C13B9.2	0	0	1.30133	1.08513	3.20584	1.68678	0	4.9186	0	0	0	0	1.78785	0.627807	1.68973	1.48131	1.90074	0	0	0	WBGene00015733
C13B9.3	10.878	9.99674	9.10931	7.59588	11.1136	13.2131	7.62893	21.3139	10.3647	12.5655	7.90014	8.34471	10.2801	15.0674	13.2362	10.3691	7.60297	5.86846	12.5197	14.9815	WBGene00015734
C13B9.4	0	0.869282	0.650665	0.542563	0.854891	1.12452	0	3.27906	0	0	1.12859	0	0	0.313904	1.12649	0.493769	0	0	0.963057	0	WBGene00015735
C13C12.1	0	0	0	0	0.213723	0	0	0	0	0	0	0	0	0	0	0.493769	0	0	1.92611	0	WBGene00000285
C13C12.2	0	0	0	0	0	0	0	0	0	0	0	0	0	0	0	0	0	0	0	0	WBGene00007552
C13C4.1	0	0	0	0	0	0	0	0	0	0	0	0	0	0	0	0	0	0	0	0	WBGene00007546
C13C4.2	0	0	0	0	0	0.562259	0	0	0	1.79507	0	0	0	0	0	1.48131	2.85111	1.46711	2.88917	0	WBGene00007547
C13C4.3	0	0	0	0	0	0	0	1.63953	0	0	0	0	0	0	0	0	0	0	0	0	WBGene00003726
C13C4.4	0	0	0	0	0	0.281129	11.4434	3.27906	0	6.7315	0	0	0	0	0.844866	1.48131	1.90074	2.93423	3.85223	4.49445	WBGene00007548
C13C4.5	0	0	0.325332	0	0	0	0	0	0	0	0	0	0	0	0	0	0	0	0	0	WBGene00007549
C13C4.6	0	0	0	0	0	0	0	0	0	0	0	0	0	0	0	0	0	0	0	0	WBGene00007550
C13C4.7	0	0	0	0	0	0	0	0	0	0	0	0	0	0	0	0	0	0	0	0	WBGene00007551
C13C4.8	0	0	0	0	0	0	0	0	0	0	0	0	0	0	0	0	0	0	0	0	WBGene00195250
C13D9.1	0	0	0	0	0	0	0	0	0	0	0	0	0	0	0	0	0	0	0	0	WBGene00005657
C13D9.2	0	0	0	0	0	0	0	0	0	0	0	0	0	0	0	0	0	0	0	0	WBGene00005656
C13D9.3	0	0	0	0	0	0	0	0	0	0	0	0	0	0	0	0	0	0	0	0	WBGene00005659
C13D9.4	0	0	0	0	0	0	0	0	0	0	0	0	0	0	0	0	0	0	0	0	WBGene00015736
C13D9.5	0	0	0	0	0	0	0	0	0	0	0	0	0	0	0	0	0	0	0	0	WBGene00015737
C13D9.6	0	0	0	0	0	0	0	0	0	0	0	0	0	0	0	0	0	0	0	0	WBGene00015738
C13D9.7	0	0	0	0	0	0.281129	0	0	0	0.897533	0	0	0	0	0.281622	0.493769	0	0	0	1.49815	WBGene00003573
C13D9.8	0	0	0	0	0	0	0	0	0	0	0	0	0	0	0	0	0	0	0	0	WBGene00003574
C13D9.9	0	0	0	0	0	0	0	0	0	0	0	0	0	0	0	0	0	0	0	0	WBGene00015739
C13E3.1	0	0	0	0	0	0	0	0	0	0	0	0	0	0	0	0	0	0	0	0	WBGene00015740
C13F10.1	0	0	0	0	0	0	0	0	1.8845	0	0	0	0	0.313904	0	0.987537	0	0	0	1.49815	WBGene00015741
C13F10.2	0	0.434641	1.30133	5.15435	6.41168	5.34146	0	3.27906	4.71125	4.93643	0	1.51722	1.34088	1.56952	3.09784	2.46884	1.90074	0	0	1.49815	WBGene00015742
C13F10.4	6.79874	12.1699	21.4719	19.8035	18.8076	18.2734	30.5157	36.0697	22.614	26.0285	6.77155	11.3792	19.2193	15.3813	20.84	23.2071	25.66	38.145	26.9656	31.4611	WBGene00015743
C13F10.5	4.07925	8.69282	11.3866	10.3087	7.69402	9.83953	5.7217	0	3.769	8.52656	4.51437	6.06888	7.59834	6.90588	7.60379	6.91276	6.6526	1.46711	2.88917	5.9926	WBGene00015744
C13F10.6	10.878	10.866	9.75997	9.76613	11.3273	14.3376	11.4434	16.3953	13.1915	8.52656	2.25718	9.10332	7.59834	5.02246	8.73028	6.91276	6.6526	10.2698	5.77834	2.9963	WBGene00015745
C13F10.7	6.79874	11.3007	20.8213	23.8728	22.6546	17.7112	30.5157	36.0697	30.152	20.6433	5.64296	8.34471	10.7271	14.7535	11.5465	19.257	28.5111	33.7436	20.2242	29.963	WBGene00015746
C13G3.1	0	0	0	0.813844	0	0	0	0	0.94225	0	0	0	0	0.313904	0.281622	0.493769	0.950372	1.46711	2.88917	5.9926	WBGene00007553
C13G3.2	0	0	0	0	0	0	0	0	0	0	0	0	0	0	0	0	0	0	0	0	WBGene00001991
C13G3.3	21.756	21.732	39.0399	57.7829	59.8424	58.7561	30.5157	47.5464	33.921	48.9156	23.7004	40.965	40.2265	39.238	49.0022	50.3644	44.6675	79.2242	37.5592	49.4389	WBGene00007554
C13G5.1	0	0	0	0	0	0	0	0	0	0	0	0	0	0	0	0	0	0	0	0	WBGene00000439
C13G5.2	9.51824	12.1699	13.664	14.6492	17.3115	13.2131	7.62893	8.19766	12.2492	17.9507	14.6717	11.3792	12.9619	7.21979	9.29352	10.8629	9.50372	4.40134	6.7414	4.49445	WBGene00015747
C14A11.2	0	0	0	0	0	0	0	0	0	0	0	0	0	0	0	0	0	0	0	0	WBGene00015748
C14A11.3	0	0	0.325332	0	0.213723	2.24904	1.90723	0	3.769	9.4241	0	0	0	0.313904	0.563244	5.43146	9.50372	7.33557	3.85223	5.9926	WBGene00006496
C14A11.5	0	0	0	0	0	0	0	0	0	0	0	0	0	0	0	0	0	0	0	0	WBGene00015750
C14A11.6	0	0	0	0	0	0	0	0	0	0	0	0	0	0	0	0	0	0	0	0	WBGene00015751
C14A11.7	0	0	0	0	0	0	1.90723	0	0	0	0	0	0	0	0	0	0	0	0	0	WBGene00006055
C14A11.9	0	0	0	0	0.641168	8.99614	15.2579	9.83719	11.307	11.2192	0	0	0	0	1.40811	10.3691	14.2556	10.2698	4.81529	5.9926	WBGene00050944
C14A4.1	20.3962	26.9477	21.1466	18.4471	14.3194	5.62259	5.7217	6.55813	5.6535	5.83397	18.0575	18.2066	25.0298	24.7984	14.0811	2.46884	2.85111	1.46711	0.963057	1.49815	WBGene00007555
C14A4.10	12.2377	15.6471	16.9173	18.1758	11.1136	14.3376	3.81446	4.9186	10.3647	17.0531	12.4145	12.1378	12.068	19.1481	11.5465	10.8629	5.70223	16.1383	18.2981	16.4796	WBGene00006397
C14A4.11	9.51824	7.82354	7.80798	14.3779	8.54891	8.15275	15.2579	9.83719	15.076	15.7068	4.51437	3.79305	3.12873	7.53369	9.0119	12.838	7.60297	4.40134	9.63057	7.49075	WBGene00007561
C14A4.12	0	0	0	0	0	0	0	0	0.94225	0	0	0	0	0	0	0	0	0	0	0	WBGene00007562
C14A4.13	0	0	0	0	0	0	0	0	0	0	0	0	0	0	0	0	0	0	0	0	WBGene00007563
C14A4.14	36.7132	28.6863	25.0506	16.2769	20.5174	13.4942	13.3506	11.4767	8.48025	19.297	15.8003	30.3444	21.9011	25.4262	22.5298	16.2944	19.9578	16.1383	10.5936	14.9815	WBGene00007564
C14A4.15	0	0	0	0	0	0	0	0	0	0	0	0	0	0	0	0	0	0	0	0	WBGene00005713
C14A4.2	8.15849	16.0817	10.4106	8.681	10.045	5.34146	1.90723	1.63953	5.6535	5.83397	9.02873	8.34471	7.59834	9.41711	7.04055	5.92522	1.90074	1.46711	1.92611	1.49815	WBGene00000933
C14A4.3	5.43899	6.08497	7.80798	8.681	6.6254	9.5584	9.53616	8.19766	16.9605	8.97533	1.12859	9.86193	8.49227	7.21979	11.8281	9.87537	8.55334	14.6711	11.5567	10.487	WBGene00007556
C14A4.4	20.3962	24.3399	24.3999	24.9579	23.5095	19.3979	30.5157	9.83719	23.5562	24.2334	21.4432	30.3444	21.4541	26.9957	27.5989	19.7507	16.1563	23.4738	25.0395	13.4833	WBGene00000796
C14A4.5	13.5975	5.21569	6.18131	6.78203	3.63329	5.06033	15.2579	0	2.82675	5.3852	5.64296	7.5861	6.25746	7.21979	9.0119	4.93769	7.60297	2.93423	6.7414	2.9963	WBGene00000798
C14A4.6	0	0	0	0	0	0	0	0	0	0	0	0	0	0	0	0	0	0	0	0	WBGene00007557
C14A4.7	0	0	0	0	0	0	0	0	0	0	0	0	0	0	0	0	0	0	0	0	WBGene00007558
C14A4.8	0	0	0	0	0	0	0	0	0	0	0	0	0	0	0	0	0	0	0	0	WBGene00007559
C14A4.9	0	0	0	0	0	0	0	0	0	0	0	0	0	0	0	0	0	0	0	0	WBGene00007560
C14A6.1	0	0	0	0	0	0	0	0	0	0	0	0	0	0	0	0	0	0	0	0	WBGene00007565
C14A6.12	0	0	0	0	0	0	0	0	0	0	0	0	0	0	0	0	0	0	0	0	WBGene00050955
C14A6.13	0	0	0	0	0	0	0	0	0	0	0	0	0	0	0	0	0	0	0	0	WBGene00050956
C14A6.16	0	0	0	0	0	0	0	0	0	0	0	0	0	0	0	0	0	0	0	0	WBGene00206536
C14A6.2	0	0	0	0	0	0	0	0	0	0	0	0	0	0	0	0	0	0	0	0	WBGene00007566
C14A6.3	0	0	0	0	0	0	0	0	0	0	0	0	0	0	0	0	0	0	0	0	WBGene00007567
C14A6.5	0	0	0	0	0	0	0	0	0	0	0	0	0	0	0	0	0	0	0	0	WBGene00007569
C14A6.6	0	0	0	0	0	0	0	0	0	0	0	0	0	0	0	0	0	0	0	0	WBGene00007570
C14A6.7	0	0	0	0	0	0	0	0	0	0	0	0	0	0	0	0	0	0	0	0	WBGene00007571
C14A6.8	0	0	0	0	0	0	0	0	0	0	0	0	0	0	0	0	0	0	0	0	WBGene00007572
C14B1.1	44.8717	46.0719	43.2692	55.0701	50.6523	60.724	34.3302	55.7441	79.149	75.3928	50.7866	57.6544	55.8702	38.2963	41.1168	55.3021	81.732	105.632	107.862	53.9334	WBGene00003962
C14B1.10	1.35975	1.73856	3.90399	1.08513	1.28234	1.68678	0	0	0.94225	0.897533	3.38578	0	3.57569	2.82513	1.40811	0	0.950372	1.46711	2.88917	0	WBGene00007581
C14B1.12	5.43899	9.12746	13.9893	14.3779	14.5331	10.964	11.4434	4.9186	4.71125	7.62903	9.02873	11.3792	14.7497	15.6952	11.2649	12.3442	6.6526	2.93423	4.81529	4.49445	WBGene00184990
C14B1.2	4.07925	14.7778	34.1599	40.4209	41.2485	42.7317	40.0519	50.8255	56.535	44.4279	9.02873	26.5514	37.9917	24.7984	33.2314	27.651	68.4268	76.29	71.2662	46.4426	WBGene00007573
C14B1.3	0	0.434641	0.325332	0.271281	1.28234	2.53017	0	0	0.94225	0.448767	0	0	0	0.627807	0.563244	0.493769	2.85111	0	1.92611	0	WBGene00007574
C14B1.4	4.07925	9.12746	14.64	13.5641	11.541	15.181	11.4434	18.0349	18.845	30.9649	5.64296	12.1378	11.621	12.5561	14.6443	20.7383	23.7593	11.7369	15.4089	14.9815	WBGene00006474
C14B1.5	10.878	4.78105	7.15731	4.06922	4.27445	4.7792	0	0	7.538	8.52656	5.64296	6.06888	9.83315	6.59198	4.78757	2.46884	2.85111	2.93423	4.81529	0	WBGene00007576
C14B1.6	1.35975	5.21569	5.53065	4.06922	3.63329	6.74711	1.90723	6.55813	1.8845	3.14137	1.12859	5.31027	2.68177	3.45294	6.4773	3.45638	4.75186	5.86846	4.81529	4.49445	WBGene00007577
C14B1.7	4.07925	13.0392	18.2186	17.0907	9.19008	3.93581	0	3.27906	1.8845	1.79507	12.4145	15.9308	19.6663	13.4979	8.73028	4.44392	0.950372	2.93423	0.963057	2.9963	WBGene00007578
C14B1.8	1.35975	2.1732	4.22932	6.23947	4.7019	1.96791	1.90723	3.27906	4.71125	4.48767	1.12859	3.79305	5.8105	3.45294	3.94271	5.43146	4.75186	4.40134	0.963057	1.49815	WBGene00007579
C14B1.9	6.79874	13.4739	18.8693	24.144	33.127	27.8318	24.794	29.5116	24.4985	30.9649	6.77155	18.2066	19.6663	12.5561	18.8687	24.1947	29.4615	38.145	29.8548	34.4574	WBGene00007580
C14B4.2	0	0	0	0	0	0	0	0	0	0.897533	0	0	0	0	0	0.493769	0	0	0.963057	0	WBGene00007583
C14B9.1	0	0	0.325332	1.08513	0.427445	1.40565	7.62893	6.55813	4.71125	3.14137	0	0	1.34088	0	0.844866	1.48131	5.70223	0	1.92611	7.49075	WBGene00002011
C14B9.10	23.1157	23.036	25.7013	14.9205	14.3194	14.0565	13.3506	9.83719	7.538	14.3605	25.9576	15.1722	25.0298	21.9733	11.2649	10.3691	6.6526	8.80269	8.66751	10.487	WBGene00015755
C14B9.2	1.35975	1.73856	2.60266	1.89897	1.06861	1.12452	3.81446	0	0.94225	1.79507	0	0	0	0.627807	0	0.987537	0.950372	1.46711	0	2.9963	WBGene00015752
C14B9.3	0	0	0	0	0	0	0	0	0	0	0	0	0	0	0	0	0	0	0	0	WBGene00015753
C14B9.4	43.512	36.0752	50.7518	59.9532	69.8873	60.1617	40.0519	50.8255	62.1885	47.1205	36.1149	30.3444	46.9309	44.5743	58.5774	49.3769	52.2704	66.0202	55.8573	52.4352	WBGene00004042
C14B9.6	0	0	0	0	0	3.93581	0	1.63953	0.94225	2.24383	0	0	0	0	2.25298	3.45638	5.70223	2.93423	0.963057	4.49445	WBGene00001565
C14B9.7	407.925	318.592	266.122	202.376	172.902	181.329	179.28	60.6627	50.8815	16.6044	484.166	303.444	299.017	274.98	199.67	208.37	95.0372	26.4081	20.2242	11.9852	WBGene00004433
C14B9.8	1.35975	4.34641	3.57866	6.51075	5.77051	5.62259	5.7217	8.19766	5.6535	7.62903	4.51437	4.55166	2.68177	5.65027	6.19568	4.93769	4.75186	11.7369	9.63057	2.9963	WBGene00015754
C14C10.1	0	0	0	0	0	0	0	0	0	0	0	0	0	0	0	0	0	0	0	0	WBGene00007584
C14C10.2	0	2.1732	2.27733	1.62769	1.06861	1.68678	1.90723	0	0	0.897533	1.12859	2.27583	1.78785	0.627807	1.68973	1.48131	0.950372	0	0	0	WBGene00007585
C14C10.3	24.4755	24.7745	18.5439	23.0589	19.6625	27.2696	15.2579	11.4767	16.9605	15.7068	15.8003	25.0341	16.5376	25.4262	24.5011	11.3567	22.8089	17.6054	13.4828	16.4796	WBGene00007586
C14C10.4	12.2377	8.69282	7.80798	10.0374	9.19008	5.06033	7.62893	4.9186	2.82675	9.4241	3.38578	9.86193	7.15138	10.3588	9.0119	9.3816	10.4541	8.80269	9.63057	4.49445	WBGene00007587
C14C10.5	48.951	44.3334	53.0292	65.6501	55.3542	51.1656	40.0519	88.5347	64.073	49.3643	46.2723	54.6199	40.6735	58.3861	66.1812	55.7959	57.0223	89.494	78.0076	65.9186	WBGene00007588
C14C10.6	1.35975	0.869282	1.95199	1.62769	1.49606	1.68678	1.90723	3.27906	3.769	4.0389	0	0.75861	0.446961	0.627807	0.281622	1.97507	0	1.46711	0.963057	1.49815	WBGene00007589
C14C10.7	0	0	0	0	0.213723	0	0	0	0	0	0	0	0	0	0	0	0	0	0	0	WBGene00007590
C14C11.1	0	0	0	0.271281	0.427445	0	0	0	0.94225	0	0	0	0	0	0.281622	0	0	0	0	0	WBGene00015765
C14C11.2	1.35975	4.34641	5.85598	9.76613	14.1057	10.6829	9.53616	6.55813	5.6535	15.2581	6.77155	3.03444	8.0453	5.96417	9.57515	3.95015	5.70223	5.86846	6.7414	5.9926	WBGene00015766
C14C11.3	0	0	0.325332	0	0	0.281129	0	0	0.94225	0	0	0	0	0	0	0	0	0	0	2.9963	WBGene00015767
C14C11.4	0	0	0	0	0	0	0	0	0	0	0	0	0	0	0	0	0	0	0	0	WBGene00015768
C14C11.5	0	0	0	0	0	0	0	0	0	0	0	0	0	0	0	0	0	0	0	0	WBGene00006008
C14C11.6	4.07925	7.38889	8.45864	7.05331	6.41168	6.18485	3.81446	8.19766	4.71125	4.93643	10.1573	5.31027	10.2801	7.53369	9.57515	3.45638	3.80149	2.93423	2.88917	1.49815	WBGene00003507
C14C11.7	14.9572	29.1209	31.8826	33.0963	31.8447	27.5507	30.5157	26.2325	48.997	50.2619	5.64296	12.8964	19.2193	12.5561	11.8281	17.7757	20.9082	23.4738	24.0764	25.4685	WBGene00015769
C14C11.8	0	0.434641	0	0	0	0	0	0	0	0	0	0	0	0.313904	0	0	0	0	0	0	WBGene00004104
C14C6.1	0	0	0	0	0	0	0	0	0	0	0	0	0	0	0	0	0	0	0	0	WBGene00005898
C14C6.10	0	0	0	0	0	0	0	0	0	0	0	0	0	0	0	0	0	0	0	0	WBGene00005585
C14C6.12	0	0	0	0	0	0	0	0	0	0	0	0	0	0	0	0	0	0	0	0	WBGene00015763
C14C6.13	0	0	0	0	0	0	0	0	0	0	0	0	0	0	0	0	0	0	0	0	WBGene00015764
C14C6.2	0	0	0	0	0	0	0	0	0	0	0	0	0	0	0	0	0	0	0	0	WBGene00015756
C14C6.3	0	0	0	0	0	0	0	0	0	0	0	0	0	0	0	0	0	0	0	0	WBGene00015757
C14C6.4	0	0	0	0	0	0	0	0	0	0	0	0	0	0	0	0	0	0	0	0	WBGene00015758
C14C6.5	0	0	0	0	0	0	0	0	0	0	0	0	0	0	0.563244	0.493769	0	0	0	0	WBGene00015759
C14C6.6	0	0	0	0	0	0	0	0	0	0	0	0	0	0	0	0	0	0	0	0	WBGene00015760
C14C6.7	0	0	0	0	0	0	0	0	0	0	0	0	0	0	0	0	0	0	0	0	WBGene00015761
C14C6.8	0	0	0	0	0	0	0	0	0	0	0	0	0	0	0	0	0	0	0	0	WBGene00015762
C14C6.9	0	0	0	0	0	0	0	0	0	0	0	0	0	0	0	0	0	0	0	0	WBGene00005899
C14E2.1	0	0	0	0	0	0	0	0	0	0	0	0	0	0	0	0	0	0	0	0	WBGene00015770
C14E2.11	0	0	0	0	0	0	0	0	0	0	0	0	0	0	0	0	0	0	0	0	WBGene00206378
C14E2.2	0	0	0	0	0	0	0	0	0	0	0	0	0	0	0	0	0	0	0	0	WBGene00015771
C14E2.3	0	0	0	0	0	0	0	0	0	0	0	0	0	0	0	0	0	0	0	0	WBGene00015772
C14E2.4	0	0	0	0	0	0	0	0	0	0	0	0	0	0	0	0	0	0	0	0	WBGene00015773
C14E2.5	0	0	0	0	0	0	0	0	0	0	0	0	0	0	0	0	0	0	0	0	WBGene00015774
C14E2.6	0	0	0	0	0	0	0	0	0	0	0	0	0	0	0	0	0	0	0	0	WBGene00015775
C14E2.7	0	0	0	0	0	0	0	0	0	0	0	0	0	0	0	0	0	0	0	0	WBGene00044562
C14F11.1	0	1.30392	1.95199	1.35641	5.77051	46.9486	49.588	55.7441	56.535	50.2619	0	1.51722	0	1.56952	19.9952	30.6137	36.1141	60.1517	59.7095	65.9186	WBGene00015778
C14F11.2	0	0	0.325332	0	0.213723	0.281129	1.90723	0	3.769	2.24383	0	0	0.446961	0.941711	0.281622	0.987537	0.950372	1.46711	0	1.49815	WBGene00015779
C14F11.3	0	0	0	0	0.213723	0.281129	0	0	0	0	0	0	0	0	0	0	0	0	0	0	WBGene00001803
C14F11.4	0	0	0	0.271281	0.213723	0	0	0	0.94225	0.897533	0	0	0	0.313904	0.281622	0	0	0	0.963057	1.49815	WBGene00015780
C14F11.5	0	0	0	0	0	0	0	0	0	0	0	0	0.446961	0	0	0	0	0	0	0	WBGene00002024
C14F11.6	0	0	0.325332	0	0	0.281129	0	0	0	0	0	0	0	0	0	0	0	0	0	0	WBGene00015781
C14F11.7	0	0	0	0	0	0	0	0	0	0	0	0	0	0	0	0	0	0	0	0	WBGene00015782
C14F5.1	0	0	0.650665	0	0	1.12452	5.7217	8.19766	4.71125	7.62903	1.12859	0	0	0.313904	0.281622	3.45638	1.90074	4.40134	5.77834	10.487	WBGene00015776
C14F5.2	0	0	0	0	0	0	0	0	0	0	0	0	0	0	0	0	0	0	0	0	WBGene00006980
C14F5.3	0	0	0	0.271281	0.641168	0	0	1.63953	0	0.897533	0	0	0.446961	0	0	0.987537	0	0	0	0	WBGene00006588
C14F5.4	0	0	0	0	0	0.843388	0	3.27906	4.71125	2.24383	0	0	0	0	0.844866	1.48131	0	2.93423	1.92611	2.9963	WBGene00015777
C14F5.5	0	0	0.650665	0.542563	0.213723	4.21694	7.62893	3.27906	10.3647	8.97533	0	0	0	0.313904	1.97135	2.46884	6.6526	0	7.70446	1.49815	WBGene00004774
C14H10.1	0	0	0	0.271281	0	0	0	1.63953	0	0.897533	0	0	0	0.627807	0	0	0	1.46711	0.963057	0	WBGene00007591
C14H10.2	0	0.434641	0.650665	0.271281	0.213723	0.281129	0	1.63953	0	2.6926	0	0.75861	0	0.313904	0	0	0.950372	4.40134	0	1.49815	WBGene00007592
C14H10.3	0	0	0	0	0	0	0	0	0.94225	0	0	0	0	0.313904	0	0	0	0	0	0	WBGene00007593
C14H10.4	0	0	0	0	0	0	0	0	0	0	0	0	0	0	0	0	0	0	0	0	WBGene00006135
C15A11.1	0	0	0	0	0	0	0	0	0	0	0	0	0	0	0	0	0	0	0	0	WBGene00000612
C15A11.2	0	0	0	0	0	0	0	0	0	0	0	0	0	0	0	0	0	0	0	0	WBGene00007597
C15A11.3	0	0	0	0	0	0.281129	0	0	0	0	0	0	0	0	0	0	0	0	0	0	WBGene00004944
C15A11.4	0	0	0	0	0	0	0	0	0	0	0	0	0	0	0	0	0	0	0	0	WBGene00007598
C15A11.5	0	0	0	0	0	0	0	0	0	0	0	0	0	0	0	0	0	0	0	0	WBGene00000596
C15A11.6	0	0	0	0	0	0	0	0	0	0	0	0	0	0	0	0	0	0	0	0	WBGene00000638
C15A11.7	0	0	0	0	0	0	0	0	0	0	0	0	0	0	0	0	0	0	0	0	WBGene00007599
C15A7.1	0	0	0	0	0	0	0	0	0	0	0	0	0	0	0	0	0	0	0	0	WBGene00007594
C15A7.2	0	0	0	0	0	0	0	0	0	0	0	0	0	0	0	0	0	0	0	0	WBGene00007595
C15A7.4	0	0	0	0	0	0	0	0	0	0	0	0	0	0	0	0	0	0	0	0	WBGene00045385
C15B12.1	0	0	0	0	0	0	0	0	0	0	0	0	0	0	0	0	0	0	0	0	WBGene00015783
C15B12.2	0	0	0	0	0	0	0	0	0	0	0	0	0	0	0	0	0	0	0	0	WBGene00015784
C15B12.3	0	0	0	0	0	0	0	0	0	0	0	0	0	0	0	0	0	0	0	0	WBGene00015785
C15B12.4	0	0	0	0	0	0	0	0	0	0	0	0	0	0	0	0	0	0	0	0	WBGene00015786
C15B12.5	0	0	0	0	0	0	0	0	0	0	0	0	0	0	0.281622	0	0	0	0	2.9963	WBGene00001517
C15B12.6	0	0	0	0	0	0.281129	0	0	0	0	0	0	0	0	0	0	0	0	0	0	WBGene00015787
C15B12.7	0	0	0.325332	0	0	2.24904	5.7217	0	1.8845	5.3852	0	0	0	0	0	7.40653	4.75186	1.46711	2.88917	2.9963	WBGene00000393
C15B12.8	0	0	0	0	0	0	0	0	0	0	0	0	0	0	0	0	0	0	0	0	WBGene00015788
C15B12.9	0	0	0	0	0	0	0	0	0	0	0	0	0	0	0	0	0	0	0	0	WBGene00044573
C15C6.1	0	0	0	0	0	0.562259	0	0	0	0	0	0	0	0	0	0.493769	0.950372	0	0	0	WBGene00007600
C15C6.2	0	0.434641	0	0	0	0.281129	0	0	0	0	0	0	0.446961	0	0	0	0	0	0	0	WBGene00007601
C15C6.3	0	0	1.95199	0.542563	0.427445	0.562259	0	0	0	0	0	0.75861	0.446961	0.627807	0.563244	1.97507	0.950372	0	0.963057	0	WBGene00007602
C15C6.4	4.07925	10.866	6.83198	10.58	10.045	8.15275	9.53616	13.1163	9.4225	15.7068	5.64296	9.86193	3.57569	11.6144	6.4773	8.39407	11.4045	1.46711	4.81529	5.9926	WBGene00007603
C15C7.1	0	0	0.325332	0	0	0.843388	0	3.27906	1.8845	2.24383	0	0	0	0	0.281622	1.48131	1.90074	0	0.963057	4.49445	WBGene00015789
C15C7.2	0	0	0	0	0	1.96791	7.62893	4.9186	5.6535	0	0	0	0	0.627807	1.68973	4.44392	0.950372	0	3.85223	0	WBGene00002220
C15C7.4	0	0	0	0	0	0	0	0	0	0	0	0	0	0	0	0	0	0	0	0	WBGene00015790
C15C7.5	1.35975	0	0.325332	0	0	1.12452	0	4.9186	1.8845	1.3463	0	0	0	0.627807	0.281622	6.41899	4.75186	0	6.7414	1.49815	WBGene00015791
C15C7.6	0	0	0.325332	0	0	0	0	0	0	0	0	0	0	0.313904	0	0	0	0	0	0	WBGene00015792
C15C7.7	0	0	0	0.271281	0	0.562259	3.81446	1.63953	2.82675	0.448767	0	0	0	0.313904	0.844866	0.987537	2.85111	5.86846	1.92611	0	WBGene00015793
C15C8.1	0	0	0	0	0	0	0	0	0	0	0	0	0	0	0	0	0	0	0	0	WBGene00007604
C15C8.2	0	0	0	0	0	0	0	0	0	0	0	0	0	0	0	0	0	0	0	0	WBGene00000521
C15C8.3	2.7195	0	0.325332	0	0	0	1.90723	0	0	0	0	0	0	0	0	0	0	0	0	0	WBGene00007605
C15C8.4	1.35975	4.34641	3.25332	7.59588	6.6254	8.15275	9.53616	1.63953	4.71125	8.97533	2.25718	7.5861	8.49227	2.51123	9.0119	7.40653	7.60297	10.2698	3.85223	10.487	WBGene00007606
C15C8.5	0	0	0	0	0	0	0	0	0	0	0	0	0	0	0	0	0	0	0	0	WBGene00007607
C15C8.6	0	0	0	0	0	0	0	0	0	0	0	0	0	0	0	0	0	0	0	0	WBGene00007608
C15C8.7	24.4755	23.9052	27.3279	20.0748	25.0056	18.2734	26.7013	11.4767	17.9027	17.9507	6.77155	21.2411	25.0298	19.1481	15.4892	13.3318	20.9082	22.0067	11.5567	31.4611	WBGene00007609
C15C8.8	0	0	0	0	0	0	0	0	0	0	0	0	0	0	0	0	0	0	0	0	WBGene00045460
C15F1.1	0	0	0	0	0	0	0	0	0	0	0	0	0	0	0	0	0	0	0.963057	0	WBGene00015794
C15F1.2	0	0	0	0	0	0	0	0	0.94225	0.897533	0	0	0	0	0	0	0.950372	0	0	0	WBGene00015795
C15F1.3	4.07925	3.47713	7.15731	13.0215	16.6704	21.3658	20.9796	24.593	14.1337	24.2334	4.51437	9.10332	6.25746	10.9866	21.4033	24.1947	21.8585	32.2765	28.8917	38.9519	WBGene00006605
C15F1.4	12.2377	10.866	6.18131	9.22357	11.7547	6.46598	5.7217	11.4767	5.6535	6.7315	5.64296	9.10332	7.15138	9.73102	7.60379	3.95015	10.4541	14.6711	11.5567	4.49445	WBGene00004090
C15F1.5	1.35975	0	0.650665	1.35641	0.854891	1.96791	1.90723	0	0	0	1.12859	3.03444	1.78785	1.56952	0.563244	0.987537	0	0	0	0	WBGene00015796
C15F1.6	8.15849	19.9935	23.4239	15.7343	17.739	16.8678	19.0723	18.0349	17.9027	29.1698	14.6717	23.5169	29.0525	11.3005	16.0524	25.1822	19.0074	26.4081	19.2611	26.9667	WBGene00000198
C15F1.7	44.8717	58.2419	49.4505	41.2348	42.9583	43.5751	40.0519	52.465	53.7082	54.7495	39.5007	30.3444	49.1657	58.7	48.1573	44.4392	50.3697	46.9477	85.7121	79.4019	WBGene00004930
C15F1.8	2.7195	1.73856	3.25332	1.89897	1.70978	1.40565	0	0	0.94225	0.897533	0	3.03444	2.68177	2.82513	0.844866	1.97507	0	0	0	0	WBGene00015797
C15H11.1	0	0	0	0	0	0	0	0	0	0	0	0	0	0	0	0	0	0	0	0	WBGene00007613
C15H11.10	0	0	0	0	0	0	0	0	0	0	0	0	0	0	0	0	0	0	0	0	WBGene00007618
C15H11.11	0	0.434641	0.650665	0.271281	0	0.281129	0	0	0	0	0	0	0	0.313904	0	0	0	1.46711	0	0	WBGene00007619
C15H11.13	0	0	0	0	0	0	0	0	0	0	0	0	0	0	0	0	0	0	0	0	WBGene00077576
C15H11.2	0	0	0	0	0	0	0	0	0	0	0	0	0	0	0	0	0	0	0	0	WBGene00007614
C15H11.3	1.35975	0	0.325332	1.08513	0	0	0	0	0	0.448767	1.12859	0	0	0	0	0	0	0	0	0	WBGene00003834
C15H11.4	13.5975	10.866	18.2186	23.6015	23.7232	25.0205	30.5157	22.9535	24.4985	35.9013	11.2859	20.4825	21.4541	14.7535	21.1216	21.2321	16.1563	20.5396	15.4089	20.9741	WBGene00000985
C15H11.5	10.878	12.6046	15.616	8.681	5.34307	8.99614	7.62893	6.55813	5.6535	10.7704	10.1573	9.86193	12.9619	7.21979	13.7995	8.88784	0.950372	7.33557	1.92611	4.49445	WBGene00007615
C15H11.6	8.15849	7.82354	4.87998	7.86716	6.6254	3.93581	5.7217	1.63953	2.82675	7.18027	11.2859	1.51722	8.49227	8.7893	4.50595	2.46884	1.90074	4.40134	3.85223	1.49815	WBGene00003835
C15H11.7	69.3472	66.0654	40.0159	43.6763	52.3621	46.1052	22.8868	47.5464	40.5167	57.4421	53.0438	34.1375	40.2265	82.5567	60.5487	44.4392	47.5186	51.349	50.079	47.9408	WBGene00003922
C15H11.8	4.07925	9.99674	9.10931	4.3405	8.54891	8.43388	1.90723	4.9186	7.538	8.52656	3.38578	3.79305	6.70442	5.02246	1.68973	2.46884	5.70223	1.46711	3.85223	0	WBGene00007616
C15H11.9	35.3535	36.0752	30.9066	25.2292	21.7997	19.9602	20.9796	13.1163	14.1337	12.1167	47.4009	44.758	29.9464	19.462	19.4319	15.3068	15.2059	20.5396	15.4089	5.9926	WBGene00007617
C15H7.3	0	0	0	0	0	0	0	0	0	0	0	0	0	0	0	0	0	0	0	0	WBGene00007610
C15H7.4	0	0	0	0	0	0	0	0	0	0	0	0	0	0	0	0	0	0	0	0	WBGene00007611
C15H9.1	0	0	0.325332	0	0	0	0	0	0	0	0	0	0	0	0	0	0	0	0	0	WBGene00003778
C15H9.11	0	0	0	0	0	0	0	0	0	0	0	0	0	0	0	0	0	0	0	0	WBGene00015805
C15H9.2	0	0	0	0	0	0	0	0	0	0	0	0	0	0	0	0	0	0	0	0	WBGene00015798
C15H9.3	0	0	0	0	0	0	0	0	0	0	0	0	0	0	0	0	0	0	0	0	WBGene00015799
C15H9.4	0	0	0	0	0	0	0	0	0	0	0	0	0	0	0	0.493769	0	0	0	0	WBGene00015800
C15H9.5	0	0	0	0	0	1.40565	3.81446	3.27906	0	1.3463	0	0	0	0.313904	0.281622	0.987537	0	0	1.92611	2.9963	WBGene00015801
C15H9.6	4.07925	1.30392	3.57866	1.62769	2.56467	40.4826	72.4748	44.2674	53.7082	37.6964	3.38578	3.79305	1.78785	1.88342	12.1097	46.4143	50.3697	48.4148	60.6726	35.9556	WBGene00002007
[truncated: 18,787 more rows]
